# Supplementary material for: Genomic Metrics Applied to Rhizobiales (Hyphomicrobiales): Species Reclassification, Identification of Unauthentic Genomes and False Type Strains
Source: Front Microbiol. 2021 Mar 25;12:614957. doi: 10.3389/fmicb.2021.614957 (PMC8026895; doi:10.3389/fmicb.2021.614957)
Supplement: Supplementary file 2 [file Table_1.XLSX]

## Sheet: Table S1
Table S1. Data for the genome collection employed in this work.
assembly_accession	bioproject	biosample	wgs_master	refseq_category	taxid	species_taxid	organism_name	infraspecific_name	isolate	version_status	assembly_level	release_type	genome_rep	seq_rel_date	asm_name	submitter	gbrs_paired_asm	paired_asm_comp	ftp_path	excluded_from_refseq	relation_to_type_material	Length	GC.content	Present.Markers	Completeness	Redundancy	Weighted.completeness	Weighted.redundancy	Contigs	N50	L50	N90	L90	CDs
GCF_013004495.1	PRJNA224116	SAMN08802842	JABEPH000000000.1	na	2137761	2137761	Rhizobium sp. SEMIA 4085	strain=SEMIA 4085		latest	Contig	Major	Full	2020-05-10	ASM1300449v1	Universidade Federal do Rio Grande do Sul	GCA_013004495.1	identical	ftp://ftp.ncbi.nlm.nih.gov/genomes/all/GCF/013/004/495/GCF_013004495.1_ASM1300449v1	NA	NA	6355406	59.67	104	0.9905	1.0288	0.9724	1.0553	719	14026	137	4204	446	6734
GCF_000007125.1	PRJNA224116	SAMN02603416		representative genome	224914	29459	Brucella melitensis bv. 1 str. 16M	strain=16M		latest	Complete Genome	Major	Full	2001-12-28	ASM712v1	Integrated Genomics	GCA_000007125.1	identical	ftp://ftp.ncbi.nlm.nih.gov/genomes/all/GCF/000/007/125/GCF_000007125.1_ASM712v1		assembly from type material	3294931	57.22	104	0.9905	1.0096	0.9694	1.0125	2	2117144	1	1177787	2	3152
GCF_000007505.1	PRJNA224116	SAMN02603416		representative genome	204722	29461	Brucella suis 1330	strain=1330		latest	Complete Genome	Major	Full	2004-10-13	ASM750v1	NITE/TIGR	GCA_000007505.1	identical	ftp://ftp.ncbi.nlm.nih.gov/genomes/all/GCF/000/007/505/GCF_000007505.1_ASM750v1		assembly from type material	3315175	57.25	105	1	1.0095	1	1.0121	2	2107794	1	1207381	2	3103
GCF_000009625.1	PRJNA224116	SAMD00061086		representative genome	266835	2066070	Mesorhizobium japonicum MAFF 303099	strain=MAFF 303099		latest	Complete Genome	Major	Full	2004-05-11	ASM962v1	Kazusa	GCA_000009625.1	identical	ftp://ftp.ncbi.nlm.nih.gov/genomes/all/GCF/000/009/625/GCF_000009625.1_ASM962v1		assembly from type material	7596297	62.51	104	0.9905	1.0385	0.9814	1.0607	3	7036071	1	7036071	1	7377
GCF_000010525.1	PRJNA224116	SAMD00060925		representative genome	438753	7	Azorhizobium caulinodans ORS 571	strain=ORS 571		latest	Complete Genome	Major	Full	2007-10-16	ASM1052v1	University of Tokyo	GCA_000010525.1	identical	ftp://ftp.ncbi.nlm.nih.gov/genomes/all/GCF/000/010/525/GCF_000010525.1_ASM1052v1		assembly from type material	5369772	67.32	104	0.9905	1	0.9814	1	1	5369772	1	5369772	1	4810
GCF_000011365.1	PRJNA224116	SAMD00061083		na	224911	1355477	Bradyrhizobium diazoefficiens USDA 110	strain=USDA110		latest	Complete Genome	Major	Full	2004-05-11	ASM1136v1	Kazusa	GCA_000011365.1	identical	ftp://ftp.ncbi.nlm.nih.gov/genomes/all/GCF/000/011/365/GCF_000011365.1_ASM1136v1		assembly from type material	9105828	64.06	104	0.9905	1.0096	0.9814	1.0227	1	9105828	1	9105828	1	8498
GCF_000012725.1	PRJNA224116	SAMN02598308		representative genome	323098	913	Nitrobacter winogradskyi Nb-255	strain=Nb-255		latest	Complete Genome	Major	Full	2005-09-12	ASM1272v1	DOE Joint Genome Institute	GCA_000012725.1	identical	ftp://ftp.ncbi.nlm.nih.gov/genomes/all/GCF/000/012/725/GCF_000012725.1_ASM1272v1		assembly from type material	3402093	62.05	104	0.9905	1	0.9814	1	1	3402093	1	3402093	1	3262
GCF_000013885.1	PRJNA224116	SAMN02598307		representative genome	323097	912	Nitrobacter hamburgensis X14	strain=X14		latest	Complete Genome	Major	Full	2006-04-11	ASM1388v1	DOE Joint Genome Institute	GCA_000013885.1	identical	ftp://ftp.ncbi.nlm.nih.gov/genomes/all/GCF/000/013/885/GCF_000013885.1_ASM1388v1		assembly from type material	5011522	61.62	104	0.9905	1	0.9814	1	4	4406967	1	294829	2	4887
GCF_000015445.1	PRJNA224116	SAMN02604047		representative genome	360095	774	Bartonella bacilliformis KC583	strain=KC583; ATCC 35685		latest	Complete Genome	Major	Full	2007-01-04	ASM1544v1	TIGR	GCA_000015445.1	identical	ftp://ftp.ncbi.nlm.nih.gov/genomes/all/GCF/000/015/445/GCF_000015445.1_ASM1544v1		assembly from type material	1445021	38.24	104	0.9905	1.1635	0.9814	1.0464	1	1445021	1	1445021	1	1235
GCF_000016845.1	PRJNA224116	SAMN02604024		representative genome	444178	236	Brucella ovis ATCC 25840	strain=ATCC 25840		latest	Complete Genome	Major	Full	2007-05-30	ASM1684v1	TIGR	GCA_000016845.1	identical	ftp://ftp.ncbi.nlm.nih.gov/genomes/all/GCF/000/016/845/GCF_000016845.1_ASM1684v1		assembly from type material	3275590	57.19	105	1	1.0095	1	1.0121	2	2111370	1	1164220	2	3219
GCF_000017405.1	PRJNA224116	SAMN02598421		representative genome	439375	529	Ochrobactrum anthropi ATCC 49188	strain=ATCC 49188		latest	Complete Genome	Major	Full	2007-07-12	ASM1740v1	US DOE Joint Genome Institute	GCA_000017405.1	identical	ftp://ftp.ncbi.nlm.nih.gov/genomes/all/GCF/000/017/405/GCF_000017405.1_ASM1740v1		assembly from type material	5205777	56.12	104	0.9905	1.0288	0.9814	1.0427	6	2887297	1	1895911	2	5012
GCF_000017565.1	PRJNA224116	SAMN00623055		representative genome	402881	256618	Parvibaculum lavamentivorans DS-1	strain=DS-1		latest	Complete Genome	Major	Full	2007-07-30	ASM1756v1	US DOE Joint Genome Institute (JGI-PGF)	GCA_000017565.1	identical	ftp://ftp.ncbi.nlm.nih.gov/genomes/all/GCF/000/017/565/GCF_000017565.1_ASM1756v1		assembly from type material	3914745	62.33	104	0.9905	1.0096	0.9814	1.017	1	3914745	1	3914745	1	3703
GCF_000017645.1	PRJNA224116	SAMN02598342		representative genome	78245	280	Xanthobacter autotrophicus Py2	strain=Py2		latest	Complete Genome	Major	Full	2007-07-30	ASM1764v1	US DOE Joint Genome Institute	GCA_000017645.1	identical	ftp://ftp.ncbi.nlm.nih.gov/genomes/all/GCF/000/017/645/GCF_000017645.1_ASM1764v1		assembly from type material	5625098	67.35	104	0.9905	1	0.9814	1	2	5308934	1	5308934	1	5177
GCF_000018525.1	PRJNA224116	SAMN02604295		representative genome	483179	36855	Brucella canis ATCC 23365			latest	Complete Genome	Major	Full	2007-11-29	ASM1852v1	Virginia Bioinformatics Institute	GCA_000018525.1	identical	ftp://ftp.ncbi.nlm.nih.gov/genomes/all/GCF/000/018/525/GCF_000018525.1_ASM1852v1		assembly from type material	3312769	57.24	105	1	1.0095	1	1.0121	2	2105969	1	1206800	2	3108
GCF_000019725.1	PRJNA224116	SAMN00000277		representative genome	426355	31998	Methylobacterium radiotolerans JCM 2831	strain=JCM 2831		latest	Complete Genome	Major	Full	2008-03-21	ASM1972v1	US DOE Joint Genome Institute	GCA_000019725.1	identical	ftp://ftp.ncbi.nlm.nih.gov/genomes/all/GCF/000/019/725/GCF_000019725.1_ASM1972v1		assembly from type material	6899110	71.04	103	0.981	1.0194	0.9743	1.0373	9	6077833	1	586164	2	6504
GCF_000019845.1	PRJNA224116	SAMN02598441		representative genome	395963	533	Beijerinckia indica subsp. indica ATCC 9039	strain=ATCC 9039		latest	Complete Genome	Major	Full	2008-04-11	ASM1984v1	US DOE Joint Genome Institute	GCA_000019845.1	identical	ftp://ftp.ncbi.nlm.nih.gov/genomes/all/GCF/000/019/845/GCF_000019845.1_ASM1984v1		assembly from type material	4418616	56.98	104	0.9905	1	0.9814	1	3	4170153	1	4170153	1	4021
GCF_000019945.1	PRJNA224116	SAMN00000038		representative genome	441620	223967	Methylorubrum populi BJ001	strain=BJ001		latest	Complete Genome	Major	Full	2008-04-09	ASM1994v1	US DOE Joint Genome Institute (JGI-PGF)	GCA_000019945.1	identical	ftp://ftp.ncbi.nlm.nih.gov/genomes/all/GCF/000/019/945/GCF_000019945.1_ASM1994v1		assembly from type material	5848997	69.36	103	0.981	1.0388	0.9743	1.0757	3	5800441	1	5800441	1	5446
GCF_000021365.1	PRJNA224116	SAMN02603611		na	504832	40137	Oligotropha carboxidovorans OM5	strain=OM5; ATCC 49405		latest	Complete Genome	Major	Full	2008-10-22	ASM2136v1	Mississippi State University	GCA_000021365.1	identical	ftp://ftp.ncbi.nlm.nih.gov/genomes/all/GCF/000/021/365/GCF_000021365.1_ASM2136v1		assembly from type material	3745629	62.4	104	0.9905	1	0.9814	1	1	3745629	1	3745629	1	3579
GCF_000021745.1	PRJNA224116	SAMN00000045		representative genome	395965	199596	Methylocella silvestris BL2	strain=BL2		latest	Complete Genome	Major	Full	2008-12-15	ASM2174v1	US DOE Joint Genome Institute (JGI-PGF)	GCA_000021745.1	identical	ftp://ftp.ncbi.nlm.nih.gov/genomes/all/GCF/000/021/745/GCF_000021745.1_ASM2174v1		assembly from type material	4305430	63.08	105	1	1	1	1	1	4305430	1	4305430	1	3914
GCF_000021845.1	PRJNA224116	SAMN00000037		na	440085	408	Methylorubrum extorquens CM4	strain=CM4		latest	Complete Genome	Major	Full	2008-12-19	ASM2184v1	US DOE Joint Genome Institute (JGI-PGF)	GCA_000021845.1	identical	ftp://ftp.ncbi.nlm.nih.gov/genomes/all/GCF/000/021/845/GCF_000021845.1_ASM2184v1		assembly from synonym type material	6180732	68.08	104	0.9905	1.0192	0.9998	1.039	3	5777908	1	5777908	1	5700
GCF_000022085.1	PRJNA224116	SAMN00000043		representative genome	460265	114616	Methylobacterium nodulans ORS 2060	strain=ORS 2060		latest	Complete Genome	Major	Full	2009-01-12	ASM2208v1	US DOE Joint Genome Institute (JGI-PGF)	GCA_000022085.1	identical	ftp://ftp.ncbi.nlm.nih.gov/genomes/all/GCF/000/022/085/GCF_000022085.1_ASM2208v1		assembly from type material	8839022	68.44	103	0.981	1.0291	0.9743	1.0363	8	7772460	1	487734	2	8636
GCF_000022745.1	PRJNA224116	SAMN02603148		representative genome	568815	444163	Brucella microti CCM 4915	strain=CCM 4915		latest	Complete Genome	Major	Full	2009-08-18	ASM2274v1	CNRS	GCA_000022745.1	identical	ftp://ftp.ncbi.nlm.nih.gov/genomes/all/GCF/000/022/745/GCF_000022745.1_ASM2274v1		assembly from type material	3337369	57.25	105	1	1.0095	1	1.0121	2	2117050	1	1220319	2	3092
GCF_000046705.1	PRJNA224116	SAMEA3138249		representative genome	283166	38323	Bartonella henselae str. Houston-1	strain=Houston-1		latest	Complete Genome	Major	Full	2004-06-25	ASM4670v1	Uppsala Univ.	GCA_000046705.1	identical	ftp://ftp.ncbi.nlm.nih.gov/genomes/all/GCF/000/046/705/GCF_000046705.1_ASM4670v1		assembly from type material	1931047	38.23	104	0.9905	1	0.9814	1	1	1931047	1	1931047	1	1634
GCF_000083545.1	PRJNA224116	SAMEA3138288		na	272630	408	Methylorubrum extorquens AM1	strain=DM4		latest	Complete Genome	Major	Full	2009-07-17	ASM8354v1	Genoscope	GCA_000083545.1	identical	ftp://ftp.ncbi.nlm.nih.gov/genomes/all/GCF/000/083/545/GCF_000083545.1_ASM8354v1		assembly from synonym type material	6123851	68	103	0.981	1.0194	0.9743	1.04	3	5943768	1	5943768	1	5764
GCF_000092025.1	PRJNA224116	SAMN02603108		representative genome	176299	1176649	Agrobacterium fabrum str. C58	strain=C58		latest	Complete Genome	Major	Full	2007-11-05	ASM9202v1	Cereon	GCA_000092025.1	identical	ftp://ftp.ncbi.nlm.nih.gov/genomes/all/GCF/000/092/025/GCF_000092025.1_ASM9202v1		assembly from type material	5674258	59.04	104	0.9905	1	0.9918	1	4	2841580	1	542868	3	5288
GCF_000092045.1	PRJNA224116	SAMN02603106		representative genome	347834	29449	Rhizobium etli CFN 42	strain=CFN 42		latest	Complete Genome	Major	Full	2006-03-06	ASM9204v1	Centro de Ciencias Genomicas. Universidad Nacional Autonoma de Mexico	GCA_000092045.1	identical	ftp://ftp.ncbi.nlm.nih.gov/genomes/all/GCF/000/092/045/GCF_000092045.1_ASM9204v1		assembly from type material	6530228	61.03	104	0.9905	1.0192	0.9814	1.0383	7	4381608	1	371254	4	6255
GCF_000092925.1	PRJNA224116	SAMN02598514		representative genome	639283	921	Starkeya novella DSM 506	strain=DSM 506		latest	Complete Genome	Major	Full	2010-05-27	ASM9292v1	US DOE Joint Genome Institute	GCA_000092925.1	identical	ftp://ftp.ncbi.nlm.nih.gov/genomes/all/GCF/000/092/925/GCF_000092925.1_ASM9292v1		assembly from type material	4765023	67.88	104	0.9905	1.0096	0.9814	1.0239	1	4765023	1	4765023	1	4482
GCF_000143145.1	PRJNA224116	SAMN02598499		representative genome	582899	53399	Hyphomicrobium denitrificans ATCC 51888	strain=ATCC 51888		latest	Complete Genome	Major	Full	2010-06-25	ASM14314v1	US DOE Joint Genome Institute (JGI-PGF)	GCA_000143145.1	identical	ftp://ftp.ncbi.nlm.nih.gov/genomes/all/GCF/000/143/145/GCF_000143145.1_ASM14314v1		assembly from type material	3638969	60.81	103	0.981	1.0097	0.9732	1.0262	1	3638969	1	3638969	1	3550
GCF_000153465.1	PRJNA224116	SAMN02436161	AAPJ00000000.1	representative genome	287752	651183	Aurantimonas manganoxydans SI85-9A1	strain=SI85-9A1		latest	Scaffold	Major	Full	2006-04-07	ASM15346v1	The Gordon and Betty Moore Foundation Marine Microbiology Initiative	GCA_000153465.1	identical	ftp://ftp.ncbi.nlm.nih.gov/genomes/all/GCF/000/153/465/GCF_000153465.1_ASM15346v1		assembly from type material	4326814	66.72	104	0.9905	1.0288	0.9814	1.052	22	4285343	1	4285343	1	4027
GCF_000153705.1	PRJNA224116	SAMN02436126	AATP00000000.1	representative genome	314231	217511	Fulvimarina pelagi HTCC2506	strain=HTCC2506		latest	Scaffold	Major	Full	2006-10-23	ASM15370v1	The Gordon and Betty Moore Foundation Marine Microbiology Initiative	GCA_000153705.1	identical	ftp://ftp.ncbi.nlm.nih.gov/genomes/all/GCF/000/153/705/GCF_000153705.1_ASM15370v1		assembly from type material	3806238	61.17	103	0.981	1	0.9732	1	4	3705815	1	3705815	1	3530
GCF_000154705.2	PRJNA224116	SAMN02436119	ABIA00000000.3	representative genome	411684	244596	Hoeflea phototrophica DFL-43	strain=DFL-43		latest	Chromosome	Major	Full	2014-09-24	ASM15470v2	The Gordon and Betty Moore Foundation Microbial Genome Sequencing Project	GCA_000154705.2	identical	ftp://ftp.ncbi.nlm.nih.gov/genomes/all/GCF/000/154/705/GCF_000154705.2_ASM15470v2		assembly from type material	4468465	59.8	104	0.9905	1.0096	0.9814	1.0239	1	4468465	1	4468465	1	4231
GCF_000158715.1	PRJNA224116	SAMN02595289	ACEH00000000.1	na	520456	29460	Brucella neotomae 5K33	strain=5K33		latest	Scaffold	Major	Full	2009-02-24	ASM15871v1	Broad Institute	GCA_000158715.1	identical	ftp://ftp.ncbi.nlm.nih.gov/genomes/all/GCF/000/158/715/GCF_000158715.1_ASM15871v1		assembly from type material	3329623	56.74	105	1	1.0095	1	1.0121	11	1923503	1	1194235	2	3154
GCF_000160295.1	PRJNA224116	SAMN02595311	ACJL00000000.1	na	224914	29459	Brucella melitensis bv. 1 str. 16M	strain=16M		latest	Scaffold	Major	Full	2009-09-30	ASM16029v1	Broad Institute	GCA_000160295.1	identical	ftp://ftp.ncbi.nlm.nih.gov/genomes/all/GCF/000/160/295/GCF_000160295.1_ASM16029v1		assembly from type material	3291248	56.86	105	1	1.0095	1	1.0121	15	1170554	2	531344	3	3150
GCF_000166055.1	PRJNA224116	SAMN00007427		representative genome	648757	1069	Rhodomicrobium vannielii ATCC 17100	strain=ATCC 17100		latest	Complete Genome	Major	Full	2010-11-05	ASM16605v1	US DOE Joint Genome Institute (JGI-PGF)	GCA_000166055.1	identical	ftp://ftp.ncbi.nlm.nih.gov/genomes/all/GCF/000/166/055/GCF_000166055.1_ASM16605v1		assembly from type material	4014469	62.25	104	0.9905	1.0096	0.9814	1.0214	1	4014469	1	4014469	1	3671
GCF_000176035.2	PRJNA224116	SAMN02232036		representative genome	536019	593909	Mesorhizobium opportunistum WSM2075	strain=WSM2075		latest	Complete Genome	Major	Full	2011-06-14	ASM17603v2	US DOE Joint Genome Institute (JGI-PGF)	GCA_000176035.2	identical	ftp://ftp.ncbi.nlm.nih.gov/genomes/all/GCF/000/176/035/GCF_000176035.2_ASM17603v2		assembly from type material	6884444	62.87	104	0.9905	1.0385	0.9814	1.081	1	6884444	1	6884444	1	6635
GCF_000178815.2	PRJNA224116	SAMN02441795	ADVE00000000.2	na	595536	426	Methylosinus trichosporium OB3b	strain=OB3b		latest	Contig	Major	Full	2014-01-06	ASM17881v2	US DOE Joint Genome Institute (JGI-PGF)	GCA_000178815.2	identical	ftp://ftp.ncbi.nlm.nih.gov/genomes/all/GCF/000/178/815/GCF_000178815.2_ASM17881v2		assembly from type material	4962262	65.95	103	0.981	1.0097	0.9743	1.0241	3	4496051	1	4496051	1	4482
GCF_000182645.1	PRJNA224116	SAMN02472089	ACQA00000000.1	representative genome	641118	94625	Ochrobactrum intermedium LMG 3301	strain=LMG 3301		latest	Scaffold	Major	Full	2009-06-11	ASM18264v1	Virginia Bioinformatics Institute	GCA_000182645.1	identical	ftp://ftp.ncbi.nlm.nih.gov/genomes/all/GCF/000/182/645/GCF_000182645.1_ASM18264v1		assembly from type material	4725392	57.74	104	0.9905	1.0288	0.9814	1.0576	4	2604449	1	1919951	2	4554
GCF_000182725.1	PRJNA224116	SAMN02472076	ADEZ00000000.1	representative genome	470735	1218315	Brucella inopinata BO1	strain=BO1		latest	Contig	Major	Full	2010-09-03	ASM18272v1	Virginia Bioinformatics Institute. Virginia Tech. Blacksburg. VA	GCA_000182725.1	identical	ftp://ftp.ncbi.nlm.nih.gov/genomes/all/GCF/000/182/725/GCF_000182725.1_ASM18272v1		assembly from type material	3366774	57.06	105	1	1.0095	1	1.0121	55	142339	8	56957	22	3175
GCF_000196435.1	PRJNA224116	SAMEA3138339		representative genome	382640	85701	Bartonella tribocorum CIP 105476	strain=type strain:506 = CIP 105476		latest	Complete Genome	Major	Full	2007-11-25	ASM19643v1	Department of Biochemistry and Molecular Biology. Center for Comparative Genomics and Bioinformatics Center for Infectious Disease Dynamics. Penn State University	GCA_000196435.1	identical	ftp://ftp.ncbi.nlm.nih.gov/genomes/all/GCF/000/196/435/GCF_000196435.1_ASM19643v1		assembly from type material	2642404	38.82	104	0.9905	1.0096	0.9814	1.0154	2	2619061	1	2619061	1	2309
GCF_000218565.1	PRJNA224116	SAMN02603254		representative genome	504832	40137	Oligotropha carboxidovorans OM5	strain=OM5		latest	Complete Genome	Major	Full	2011-06-15	ASM21856v1	Georg-August Universit¤t Gĥttingen	GCA_000218565.1	identical	ftp://ftp.ncbi.nlm.nih.gov/genomes/all/GCF/000/218/565/GCF_000218565.1_ASM21856v1		assembly from type material	3896074	62.33	104	0.9905	1.0096	0.9814	1.0203	3	3595748	1	3595748	1	3710
GCF_000223195.1	PRJNA224116	SAMN02604297		na	204722	29461	Brucella suis 1330	strain=1330		latest	Complete Genome	Major	Full	2011-08-10	ASM22319v1	Virginia Bioinformatics Institute	GCA_000223195.1	identical	ftp://ftp.ncbi.nlm.nih.gov/genomes/all/GCF/000/223/195/GCF_000223195.1_ASM22319v1		assembly from type material	3315163	57.25	105	1	1.0095	1	1.0121	2	2107783	1	1207380	2	3102
GCF_000230555.1	PRJNA224116	SAMN02604343		representative genome	1082931	531813	Pelagibacterium halotolerans B2	strain=B2		latest	Complete Genome	Major	Full	2011-10-14	ASM23055v1	Zhejiang University	GCA_000230555.1	identical	ftp://ftp.ncbi.nlm.nih.gov/genomes/all/GCF/000/230/555/GCF_000230555.1_ASM23055v1		assembly from type material	3948887	61.36	105	1	1.0095	1	1.0167	2	3944837	1	3944837	1	3854
GCF_000230995.2	PRJNA224116	SAMN02232035		representative genome	754035	536018	Mesorhizobium australicum WSM2073	strain=WSM2073		latest	Complete Genome	Major	Full	2012-12-28	ASM23099v3	DOE Joint Genome Institute	GCA_000230995.3	identical	ftp://ftp.ncbi.nlm.nih.gov/genomes/all/GCF/000/230/995/GCF_000230995.2_ASM23099v3		assembly from type material	6200534	62.84	104	0.9905	1.0385	0.9814	1.0834	1	6200534	1	6200534	1	5935
GCF_000236565.1	PRJNA224116	SAMN02470709	AHAM00000000.1	representative genome	1107882	475067	Mesorhizobium alhagi CCNWXJ12-2	strain=CCNWXJ12-2		latest	Contig	Major	Full	2011-12-01	ASM23656v2	Northwest A&F University	GCA_000236565.2	identical	ftp://ftp.ncbi.nlm.nih.gov/genomes/all/GCF/000/236/565/GCF_000236565.1_ASM23656v2		assembly from type material	6968952	62.64	104	0.9905	1.0288	0.9814	1.0484	375	35501	58	11021	190	7065
GCF_000250795.1	PRJNA224116	SAMN02469571	AHWC00000000.1	na	224914	29459	Brucella melitensis bv. 1 str. 16M	strain=16M		latest	Contig	Major	Full	2012-02-28	ASM25079v2	Chinese PLA Institute for Disease Control & Prevention. Academy of Military Medical Sciences	GCA_000250795.2	identical	ftp://ftp.ncbi.nlm.nih.gov/genomes/all/GCF/000/250/795/GCF_000250795.1_ASM25079v2		assembly from type material	3283081	57.24	105	1	1.0095	1	1.0121	75	83582	13	27688	36	3145
GCF_000261485.1	PRJNA224116	SAMN02469481	AJQT00000000.1	na	716928	716925	Ensifer sojae CCBAU 05684	strain=CCBAU 05684		latest	Contig	Major	Full	2012-05-03	5684	China Agricultural University	GCA_000261485.1	identical	ftp://ftp.ncbi.nlm.nih.gov/genomes/all/GCF/000/261/485/GCF_000261485.1_05684		assembly from type material	5964336	62.03	104	0.9905	1.0096	0.9918	1.0122	231	61030	29	16404	95	5705
GCF_000262405.1	PRJNA224116	SAMN02261420	AJUA00000000.1	representative genome	864069	864069	Microvirga lotononidis	strain=WSM3557		latest	Scaffold	Major	Full	2012-05-29	ASM26240v1	JGI	GCA_000262405.1	identical	ftp://ftp.ncbi.nlm.nih.gov/genomes/all/GCF/000/262/405/GCF_000262405.1_ASM26240v1		assembly from type material	7082538	63	105	1	1.019	1	1.0432	18	1785913	2	184839	8	7013
GCF_000273375.1	PRJNA224116	SAMN02472046	AKIP00000000.1	representative genome	1095900	111504	Bartonella birtlesii IBS 325	strain=IBS 325		latest	Chromosome	Major	Full	2012-08-06	ASM27337v1	URMITE	GCA_000273375.1	identical	ftp://ftp.ncbi.nlm.nih.gov/genomes/all/GCF/000/273/375/GCF_000273375.1_ASM27337v1		assembly from type material	1834009	37.11	104	0.9905	1.0096	0.9814	1.0196	1	1834009	1	1834009	1	1634
GCF_000278155.1	PRJNA224116	SAMN02596900	AILV00000000.1	representative genome	1094553	33044	Bartonella doshiae NCTC 12862 = ATCC 700133	strain=NCTC 12862		latest	Scaffold	Major	Full	2012-07-25	Bart_dosh_NCTC_12862_R18_V1	Broad Institute	GCA_000278155.1	identical	ftp://ftp.ncbi.nlm.nih.gov/genomes/all/GCF/000/278/155/GCF_000278155.1_Bart_dosh_NCTC_12862_R18_V1		assembly from type material	1810183	37.66	104	0.9905	1	0.9814	1	7	430161	2	165876	4	1575
GCF_000278215.1	PRJNA224116	SAMN02596903	AILY00000000.1	representative genome	1094556	270250	Bartonella rattimassiliensis 15908	strain=15908		latest	Scaffold	Major	Full	2012-07-25	Bart_ratt_15908_V1	Broad Institute	GCA_000278215.1	identical	ftp://ftp.ncbi.nlm.nih.gov/genomes/all/GCF/000/278/215/GCF_000278215.1_Bart_ratt_15908_V1		assembly from type material	2170653	35.08	104	0.9905	1	0.9814	1	12	439823	2	181358	6	1742
GCF_000278235.1	PRJNA224116	SAMN02596904	AILZ00000000.1	na	1094562	33047	Bartonella vinsonii subsp. arupensis OK-94-513	strain=OK-94-513		latest	Scaffold	Major	Full	2012-07-25	Bart_vins_OK-94-513_V1	Broad Institute	GCA_000278235.1	identical	ftp://ftp.ncbi.nlm.nih.gov/genomes/all/GCF/000/278/235/GCF_000278235.1_Bart_vins_OK-94-513_V1		assembly from type material	1786506	37.89	104	0.9905	1	0.9814	1	6	1167482	1	465725	2	1479
GCF_000278315.1	PRJNA224116	SAMN02596910	AIMF00000000.1	na	1094555	807	Bartonella elizabethae F9251 = ATCC 49927	strain=F9251		latest	Scaffold	Major	Full	2012-07-25	Bart_eliz_F9251_V1	Broad Institute	GCA_000278315.1	identical	ftp://ftp.ncbi.nlm.nih.gov/genomes/all/GCF/000/278/315/GCF_000278315.1_Bart_eliz_F9251_V1		assembly from type material	1978557	37.62	104	0.9905	1	0.9814	1	4	1327536	1	187210	3	1648
GCF_000280015.1	PRJNA224116	SAMN02596909	AIME00000000.1	representative genome	1094551	52764	Bartonella alsatica IBS 382	strain=IBS 382		latest	Scaffold	Major	Full	2012-07-25	Bart_alsa_IBS_382_V1	Broad Institute	GCA_000280015.1	identical	ftp://ftp.ncbi.nlm.nih.gov/genomes/all/GCF/000/280/015/GCF_000280015.1_Bart_alsa_IBS_382_V1		assembly from type material	1673902	36.27	104	0.9905	1	0.9814	1	1	1673902	1	1673902	1	1385
GCF_000283235.1	PRJNA224116	SAMN02469457	AJTV00000000.1	representative genome	1134912	134	Methylocystis parvus OBBP	strain=OBBP		latest	Contig	Major	Full	2012-07-31	MetPar_1.0	CIB-CSIC	GCA_000283235.1	identical	ftp://ftp.ncbi.nlm.nih.gov/genomes/all/GCF/000/283/235/GCF_000283235.1_MetPar_1.0		assembly from type material	4475912	63.35	105	1	1.019	1	1.0321	108	95607	18	29975	51	4333
GCF_000284375.1	PRJNA224116	SAMD00060992		representative genome	1037409	375	Bradyrhizobium japonicum USDA 6	strain=USDA 6		latest	Complete Genome	Major	Full	2011-10-31	ASM28437v1	Kyoto Sangyo University	GCA_000284375.1	identical	ftp://ftp.ncbi.nlm.nih.gov/genomes/all/GCF/000/284/375/GCF_000284375.1_ASM28437v1		assembly from type material	9207384	63.67	104	0.9905	1.0096	0.9814	1.0227	1	9207384	1	9207384	1	8701
GCF_000298315.2	PRJNA224116	SAMN02469448	AEYE00000000.2	na	990285	1120045	Rhizobium grahamii CCGE 502	strain=CCGE 502		latest	Scaffold	Major	Full	2013-06-18	ASM29831v2	Universidad Nacional Autonoma de Mex	GCA_000298315.2	identical	ftp://ftp.ncbi.nlm.nih.gov/genomes/all/GCF/000/298/315/GCF_000298315.2_ASM29831v2		assembly from type material	7146037	59.44	105	1	1.0286	1	1.0578	80	343668	9	94070	24	7030
GCF_000300335.1	PRJNA224116	SAMN02471160	AMRM00000000.1	representative genome	391937	1231180	Nitratireductor pacificus pht-3B	strain=pht-3B		latest	Contig	Major	Full	2012-09-28	ASM30033v1	The Third Institute of State Oceanic Administration (SOA)	GCA_000300335.1	identical	ftp://ftp.ncbi.nlm.nih.gov/genomes/all/GCF/000/300/335/GCF_000300335.1_ASM30033v1		assembly from type material	4466205	65.51	104	0.9905	1.0096	0.9814	1.0003	51	151309	10	64378	26	4236
GCF_000300515.1	PRJNA224116	SAMN02471165	AMSI00000000.1	representative genome	1231190	721133	Nitratireductor indicus C115	strain=C115		latest	Contig	Major	Full	2012-10-01	ASM30051v1	The Third Institute of State Oceanic Administration (SOA)	GCA_000300515.1	identical	ftp://ftp.ncbi.nlm.nih.gov/genomes/all/GCF/000/300/515/GCF_000300515.1_ASM30051v1		assembly from type material	4992479	60.85	104	0.9905	1.0288	0.9814	1.0223	75	260779	7	48076	20	4861
GCF_000308295.2	PRJNA224116	SAMEA2272295	CAJQ00000000.2	representative genome	1197906	151414	Afipia birgiae 34632	strain=34632		latest	Scaffold	Major	Full	2014-02-26	Ab_34632	ebi	GCA_000308295.2	identical	ftp://ftp.ncbi.nlm.nih.gov/genomes/all/GCF/000/308/295/GCF_000308295.2_Ab_34632		assembly from type material	5334146	60.48	104	0.9905	1.0192	0.9814	1.0274	5	2944842	1	909749	3	5173
GCF_000312525.1	PRJNA224116	SAMEA2272606	CALU00000000.1	representative genome	928210	928210	Bartonella florencae	strain=R4		latest	Scaffold	Major	Full	2012-10-03	ASM31252v1	ebi	GCA_000312525.1	identical	ftp://ftp.ncbi.nlm.nih.gov/genomes/all/GCF/000/312/525/GCF_000312525.1_ASM31252v1		assembly from type material	2053511	37.28	105	1	1	1	1	89	618824	2	158186	5	1886
GCF_000312545.1	PRJNA224116	SAMEA2272101	CALV00000000.1	representative genome	929794	1468418	Bartonella senegalensis OS02	strain=OS02		latest	Scaffold	Major	Full	2012-10-03	ASM31254v1	ebi	GCA_000312545.1	identical	ftp://ftp.ncbi.nlm.nih.gov/genomes/all/GCF/000/312/545/GCF_000312545.1_ASM31254v1		assembly from type material	2002317	37.73	104	0.9905	1.0096	0.9814	1.0002	41	1115077	1	139278	4	1699
GCF_000312565.1	PRJNA224116	SAMEA2272486	CALW00000000.2	representative genome	1205681	481139	Bartonella rattaustraliani AUST/NH4	strain=AUST/NH4		latest	Contig	Major	Full	2012-12-04	ASM31256v2	ebi	GCA_000312565.2	identical	ftp://ftp.ncbi.nlm.nih.gov/genomes/all/GCF/000/312/565/GCF_000312565.1_ASM31256v2		assembly from type material	2158445	38.79	104	0.9905	1	0.9814	1	108	52303	11	8825	47	1943
GCF_000312605.1	PRJNA224116	SAMEA2271918	CALY00000000.2	na	1094556	270250	Bartonella rattimassiliensis 15908	strain=15908		latest	Contig	Major	Full	2012-12-04	ASM31260v2	ebi	GCA_000312605.2	identical	ftp://ftp.ncbi.nlm.nih.gov/genomes/all/GCF/000/312/605/GCF_000312605.1_ASM31260v2		assembly from type material	2008186	36.78	104	0.9905	1	0.9814	1	93	62317	10	11452	40	1692
GCF_000314675.2	PRJNA224116	SAMN02596753	AGWX00000000.1	representative genome	883078	56946	Afipia broomeae ATCC 49717	strain=ATCC 49717		latest	Scaffold	Major	Full	2013-02-06	Afip_broo_ATCC_49717_V1	Broad Institute	GCA_000314675.2	identical	ftp://ftp.ncbi.nlm.nih.gov/genomes/all/GCF/000/314/675/GCF_000314675.2_Afip_broo_ATCC_49717_V1		assembly from type material	5261968	61.31	104	0.9905	1.0288	0.9814	1.0381	4	2643477	1	1017137	3	5046
GCF_000314735.2	PRJNA224116	SAMN02463900	AGWZ00000000.1	representative genome	883080	1035	Afipia felis ATCC 53690	strain=ATCC 53690		latest	Scaffold	Major	Full	2013-02-06	Afip_feli_felis_ATCC_53690_V1	Broad Institute	GCA_000314735.2	identical	ftp://ftp.ncbi.nlm.nih.gov/genomes/all/GCF/000/314/735/GCF_000314735.2_Afip_feli_felis_ATCC_53690_V1		assembly from type material	4203290	60.64	104	0.9905	1.0192	0.9814	1.0442	11	4095224	1	4095224	1	4052
GCF_000325745.1	PRJNA224116	SAMN02604174		representative genome	1215343	1273132	Liberibacter crescens BT-1	strain=BT-1		latest	Complete Genome	Major	Full	2012-12-19	ASM32574v1	University of Florida	GCA_000325745.1	identical	ftp://ftp.ncbi.nlm.nih.gov/genomes/all/GCF/000/325/745/GCF_000325745.1_ASM32574v1		assembly from type material	1504659	35.36	104	0.9905	1	0.9814	1	1	1504659	1	1504659	1	1357
GCF_000330885.1	PRJNA224116	SAMN02604105		representative genome	698761	398	Rhizobium tropici CIAT 899	strain=CIAT 899		latest	Complete Genome	Major	Full	2013-01-03	ASM33088v1	Universidad Nacional Autonoma de Mexico	GCA_000330885.1	identical	ftp://ftp.ncbi.nlm.nih.gov/genomes/all/GCF/000/330/885/GCF_000330885.1_ASM33088v1		assembly from type material	6686334	59.49	105	1	1.0286	1	1.0376	4	3837060	1	549467	3	6360
GCF_000336555.1	PRJNA224116	SAMN02463899	AGWY00000000.1	representative genome	883079	1034	Afipia clevelandensis ATCC 49720	strain=ATCC 49720		latest	Scaffold	Major	Full	2013-02-06	Afip_clev_ATCC49720_G12581_V1	Broad Institute	GCA_000336555.1	identical	ftp://ftp.ncbi.nlm.nih.gov/genomes/all/GCF/000/336/555/GCF_000336555.1_Afip_clev_ATCC49720_G12581_V1		assembly from type material	4399548	61.61	104	0.9905	1.0096	0.9814	1.017	1	4399548	1	4399548	1	4200
GCF_000341355.1	PRJNA224116	SAMN02604270		representative genome	1094489	388640	Bartonella australis Aust/NH1	strain=Aust/NH1		latest	Complete Genome	Major	Full	2013-02-20	ASM34135v1	Uppsala University	GCA_000341355.1	identical	ftp://ftp.ncbi.nlm.nih.gov/genomes/all/GCF/000/341/355/GCF_000341355.1_ASM34135v1		assembly from type material	1596490	41.84	104	0.9905	1	0.9814	1	1	1596490	1	1596490	1	1367
GCF_000344805.1	PRJNA224116	SAMD00061052		representative genome	1245469	44255	Bradyrhizobium oligotrophicum S58	strain=S58		latest	Complete Genome	Major	Full	2013-02-28	ASM34480v1	Tohoku University	GCA_000344805.1	identical	ftp://ftp.ncbi.nlm.nih.gov/genomes/all/GCF/000/344/805/GCF_000344805.1_ASM34480v1		assembly from type material	8264165	65.13	103	0.981	1.0388	0.9813	1.0466	1	8264165	1	8264165	1	7164
GCF_000350085.1	PRJNA224116	SAMEA2272539	CAUM00000000.1	representative genome	1297569	489722	Mesorhizobium metallidurans STM 2683	strain=STM 2683		latest	Contig	Major	Full	2013-03-28	ASM35008v1	Genoscope CEA	GCA_000350085.1	identical	ftp://ftp.ncbi.nlm.nih.gov/genomes/all/GCF/000/350/085/GCF_000350085.1_ASM35008v1		assembly from type material	6232533	62.45	103	0.981	1.0388	0.9678	1.0789	191	62019	31	14495	113	6061
GCF_000359745.1	PRJNA224116	SAMN02470251	AQHN00000000.1	representative genome	363754	1353277	Rhizobium freirei PRF 81	strain=PRF 81		latest	Contig	Major	Full	2013-04-10	Rhizobium sp.	Embrapa	GCA_000359745.1	identical	ftp://ftp.ncbi.nlm.nih.gov/genomes/all/GCF/000/359/745/GCF_000359745.1_Rhizobium_sp.		assembly from type material	7083871	59.93	105	1	1.0286	1	1.0121	96	246360	9	60603	30	6658
GCF_000369945.1	PRJNA224116	SAMN00839704	AQIS00000000.1	na	1169205	235	Brucella abortus 544	strain=544		latest	Scaffold	Major	Full	2013-04-19	Bruc_abor_544_V1	Broad Institute	GCA_000369945.1	identical	ftp://ftp.ncbi.nlm.nih.gov/genomes/all/GCF/000/369/945/GCF_000369945.1_Bruc_abor_544_V1		assembly from type material	3296863	57.09	105	1	1.0095	1	1.0121	3	2130625	1	1165081	2	3123
GCF_000372845.1	PRJNA224116	SAMN02256431	ARCT00000000.1	na	1132444	173366	Methylocystis rosea SV97	strain=SV97		latest	Scaffold	Major	Full	2013-04-23	ASM37284v1	DOE Joint Genome Institute	GCA_000372845.1	identical	ftp://ftp.ncbi.nlm.nih.gov/genomes/all/GCF/000/372/845/GCF_000372845.1_ASM37284v1		assembly from type material	3912050	62.5	104	0.9905	1.0385	0.9745	1.07	2	3546604	1	3546604	1	3859
GCF_000373025.1	PRJNA224116	SAMN02441721	ARDC00000000.1	na	1041138	56730	Rhizobium gallicum bv. gallicum R602sp	strain=R602sp		latest	Scaffold	Major	Full	2013-04-23	ASM37302v1	DOE Joint Genome Institute	GCA_000373025.1	identical	ftp://ftp.ncbi.nlm.nih.gov/genomes/all/GCF/000/373/025/GCF_000373025.1_ASM37302v1		assembly from type material	7220242	60.78	103	0.981	1.0194	0.9813	1.0257	38	651976	5	130918	15	6899
GCF_000374145.1	PRJNA224116	SAMN02441696	ARFG00000000.1	representative genome	1122218	217219	Neomegalonema perideroedes DSM 15528	strain=DSM 15528		latest	Scaffold	Major	Full	2013-04-23	ASM37414v1	DOE Joint Genome Institute	GCA_000374145.1	identical	ftp://ftp.ncbi.nlm.nih.gov/genomes/all/GCF/000/374/145/GCF_000374145.1_ASM37414v1		assembly from type material	3409949	67.19	104	0.9905	1.0192	0.9814	1.0207	17	1196865	2	120448	5	3034
GCF_000374525.1	PRJNA224116	SAMN02440442	ARFZ00000000.1	representative genome	1120983	340680	Amorphus coralli DSM 19760	strain=DSM 19760		latest	Scaffold	Major	Full	2013-04-23	ASM37452v1	DOE Joint Genome Institute	GCA_000374525.1	identical	ftp://ftp.ncbi.nlm.nih.gov/genomes/all/GCF/000/374/525/GCF_000374525.1_ASM37452v1		assembly from type material	4317545	67.19	104	0.9905	1.0192	0.9814	1.0232	12	605459	3	234130	7	3895
GCF_000376125.1	PRJNA224116	SAMN02441730	AQWH00000000.1	na	1122214	293089	Martelella mediterranea DSM 17316	strain=DSM 17316		latest	Contig	Major	Full	2013-04-20	ASM37612v1	DOE Joint Genome Institute	GCA_000376125.1	identical	ftp://ftp.ncbi.nlm.nih.gov/genomes/all/GCF/000/376/125/GCF_000376125.1_ASM37612v1		assembly from type material	5643744	62.41	103	0.981	1.0194	0.9732	1.0296	75	161034	11	41336	39	5194
GCF_000379145.1	PRJNA224116	SAMN02261261	ARAG00000000.1	representative genome	398525	29448	Bradyrhizobium elkanii USDA 76	strain=USDA 76		latest	Scaffold	Major	Full	2013-04-23	ASM37914v1	JGI	GCA_000379145.1	identical	ftp://ftp.ncbi.nlm.nih.gov/genomes/all/GCF/000/379/145/GCF_000379145.1_ASM37914v1		assembly from type material	9484767	63.7	103	0.981	1.0291	0.9813	1.0539	2	9116505	1	9116505	1	8964
GCF_000379605.1	PRJNA224116	SAMN02256420	ARBG00000000.1	representative genome	1041139	56731	Rhizobium giardinii bv. giardinii H152	strain=H152		latest	Scaffold	Major	Full	2013-04-23	ASM37960v1	DOE Joint Genome Institute	GCA_000379605.1	identical	ftp://ftp.ncbi.nlm.nih.gov/genomes/all/GCF/000/379/605/GCF_000379605.1_ASM37960v1		assembly from type material	6810126	60.65	105	1	1.0381	1	1.0376	190	311841	8	65419	26	6611
GCF_000380505.1	PRJNA224116	SAMN02441386	AQYH00000000.1	representative genome	1122132	363259	Kaistia granuli DSM 23481	strain=Ko04		latest	Contig	Major	Full	2013-04-23	ASM38050v1	DOE Joint Genome Institute	GCA_000380505.1	identical	ftp://ftp.ncbi.nlm.nih.gov/genomes/all/GCF/000/380/505/GCF_000380505.1_ASM38050v1		assembly from type material	4766107	65.89	103	0.981	1.0097	0.9813	1.0134	20	396348	5	217866	11	4425
GCF_000382705.1	PRJNA224116	SAMN02440500	ARQE00000000.1	representative genome	1121028	401562	Aureimonas ureilytica DSM 18598 = NBRC 106430	strain=DSM 18598		latest	Contig	Major	Full	2013-04-25	ASM38270v1	DOE Joint Genome Institute	GCA_000382705.1	identical	ftp://ftp.ncbi.nlm.nih.gov/genomes/all/GCF/000/382/705/GCF_000382705.1_ASM38270v1		assembly from type material	5087183	67.28	104	0.9905	1.0577	0.9814	1.0849	44	452612	4	65421	14	4765
GCF_000383415.1	PRJNA224116	SAMN02440966	ARTG00000000.1	representative genome	1267005	48292	Hyphomicrobium zavarzinii ATCC 27496	strain=ZV-622		latest	Scaffold	Major	Full	2013-04-26	ASM38341v1	DOE Joint Genome Institute	GCA_000383415.1	identical	ftp://ftp.ncbi.nlm.nih.gov/genomes/all/GCF/000/383/415/GCF_000383415.1_ASM38341v1		assembly from type material	4651795	63.65	104	0.9905	1.0481	0.9814	1.0173	15	666181	3	172986	9	4268
GCF_000384965.1	PRJNA224116	SAMN02472039	AGWA00000000.1	representative genome	1094491	155194	Bartonella bovis 91-4	strain=91-4		latest	Chromosome	Major	Full	2013-04-30	BBbMcIrM01	Uppsala University	GCA_000384965.1	identical	ftp://ftp.ncbi.nlm.nih.gov/genomes/all/GCF/000/384/965/GCF_000384965.1_BBbMcIrM01		assembly from type material	1624667	37.32	104	0.9905	1	0.9814	1	1	1624667	1	1624667	1	1392
GCF_000385335.1	PRJNA224116	SAMN02256400	ARWA00000000.1	representative genome	876269	876270	Methyloferula stellata AR4	strain=AR4T		latest	Contig	Major	Full	2013-04-26	ASM38533v1	DOE Joint Genome Institute	GCA_000385335.1	identical	ftp://ftp.ncbi.nlm.nih.gov/genomes/all/GCF/000/385/335/GCF_000385335.1_ASM38533v1		assembly from type material	4235448	59.54	105	1	1	1	1	1	4235448	1	4235448	1	3934
GCF_000419765.1	PRJNA224116	SAMN02440561	ATTQ00000000.1	na	1079460	57676	Rhizobium mongolense USDA 1844	strain=USDA 1844		latest	Contig	Major	Full	2013-07-09	ASM41976v1	DOE Joint Genome Institute	GCA_000419765.1	identical	ftp://ftp.ncbi.nlm.nih.gov/genomes/all/GCF/000/419/765/GCF_000419765.1_ASM41976v1		assembly from type material	7166346	59.45	105	1	1.0286	1	1.0338	96	300544	9	37399	33	7146
GCF_000421645.1	PRJNA224116	SAMN02441568	ATXK00000000.1	representative genome	1121027	182270	Aurantimonas coralicida DSM 14790	strain=DSM 14790		latest	Contig	Major	Full	2013-07-09	ASM42164v1	DOE Joint Genome Institute	GCA_000421645.1	identical	ftp://ftp.ncbi.nlm.nih.gov/genomes/all/GCF/000/421/645/GCF_000421645.1_ASM42164v1		assembly from type material	4615647	66.72	104	0.9905	1.0385	0.9814	1.052	38	316167	4	105353	13	4332
GCF_000421945.1	PRJNA224116	SAMN02469899	ASXY00000000.1	na	1336745	358	Agrobacterium radiobacter DSM 30147	strain=DSM 30147		latest	Contig	Major	Full	2013-07-10	genome	Huazhong Agricultural University	GCA_000421945.1	identical	ftp://ftp.ncbi.nlm.nih.gov/genomes/all/GCF/000/421/945/GCF_000421945.1_genome		assembly from synonym type material	7178893	59.84	70	0.6667	1.5429	0.7077	1.6195	612	23925	73	6203	300	6999
GCF_000422965.1	PRJNA224116	SAMN02440654	AUHB00000000.1	representative genome	1122963	261934	Pleomorphomonas oryzae DSM 16300	strain=DSM 16300		latest	Scaffold	Major	Full	2013-07-11	ASM42296v1	DOE Joint Genome Institute	GCA_000422965.1	identical	ftp://ftp.ncbi.nlm.nih.gov/genomes/all/GCF/000/422/965/GCF_000422965.1_ASM42296v1		assembly from type material	5230452	62.99	104	0.9905	1.0192	0.9814	1.0383	37	356878	6	139224	16	4851
GCF_000423225.1	PRJNA224116	SAMN02441508	AUHO00000000.1	representative genome	1122131	166954	Kaistia adipata DSM 17808	strain=DSM 17808		latest	Scaffold	Major	Full	2013-07-11	ASM42322v1	DOE Joint Genome Institute	GCA_000423225.1	identical	ftp://ftp.ncbi.nlm.nih.gov/genomes/all/GCF/000/423/225/GCF_000423225.1_ASM42322v1		assembly from type material	4839203	67.11	104	0.9905	1.0192	0.9814	1.0373	12	962244	2	573137	5	4525
GCF_000423365.1	PRJNA224116	SAMN02441170	AUHV00000000.1	na	1122213	454601	Maritalea myrionectae DSM 19524	strain=DSM 19524		latest	Scaffold	Major	Full	2013-07-11	ASM42336v1	DOE Joint Genome Institute	GCA_000423365.1	identical	ftp://ftp.ncbi.nlm.nih.gov/genomes/all/GCF/000/423/365/GCF_000423365.1_ASM42336v1		assembly from type material	3539530	52.61	104	0.9905	1	0.9814	1	10	1015795	2	523701	4	3463
GCF_000425185.1	PRJNA224116	SAMN02440681	AULH00000000.1	representative genome	1122962	257440	Pleomorphomonas koreensis DSM 23070	strain=DSM 23070		latest	Scaffold	Major	Full	2013-07-11	ASM42518v1	DOE Joint Genome Institute	GCA_000425185.1	identical	ftp://ftp.ncbi.nlm.nih.gov/genomes/all/GCF/000/425/185/GCF_000425185.1_ASM42518v1		assembly from type material	4620652	67.18	104	0.9905	1.0385	0.9814	1.0496	73	210737	7	44875	22	4246
GCF_000426285.1	PRJNA224116	SAMN02441532	AUFB00000000.1	representative genome	1041147	29450	Rhizobium leucaenae USDA 9039	strain=USDA 9039		latest	Scaffold	Major	Full	2013-07-11	ASM42628v1	DOE Joint Genome Institute	GCA_000426285.1	identical	ftp://ftp.ncbi.nlm.nih.gov/genomes/all/GCF/000/426/285/GCF_000426285.1_ASM42628v1		assembly from type material	6679728	59.36	104	0.9905	1.0769	0.9814	1.0622	98	214708	10	34785	39	6472
GCF_000427445.1	PRJNA224116	SAMN02441570	ATYA00000000.1	representative genome	395964	133552	Methylocapsa acidiphila B2	strain=B2		latest	Scaffold	Major	Full	2013-07-15	ASM42744v1	Joint Genome Institute	GCA_000427445.1	identical	ftp://ftp.ncbi.nlm.nih.gov/genomes/all/GCF/000/427/445/GCF_000427445.1_ASM42744v1		assembly from type material	4103433	61.84	102	0.9714	1	0.9477	1	2	3916740	1	3916740	1	3677
GCF_000427465.1	PRJNA224116	SAMN02440592	ATYB00000000.1	representative genome	935557	76745	Sinorhizobium arboris LMG 14919	strain=LMG 14919		latest	Scaffold	Major	Full	2013-07-15	ASM42746v1	JGI	GCA_000427465.1	identical	ftp://ftp.ncbi.nlm.nih.gov/genomes/all/GCF/000/427/465/GCF_000427465.1_ASM42746v1		assembly from type material	6850303	62.02	104	0.9905	1.0192	0.9998	1.0252	7	3676556	1	685926	4	6322
GCF_000429045.1	PRJNA224116	SAMN02441547	AUBC00000000.1	representative genome	1123229	552063	Salinarimonas rosea DSM 21201	strain=DSM 21201		latest	Scaffold	Major	Full	2013-07-15	ASM42904v1	DOE Joint Genome Institute	GCA_000429045.1	identical	ftp://ftp.ncbi.nlm.nih.gov/genomes/all/GCF/000/429/045/GCF_000429045.1_ASM42904v1		assembly from type material	5245321	71.77	105	1	1.019	1	1.0432	56	220202	9	51133	26	4887
GCF_000429865.1	PRJNA224116	SAMN02441550	AUCR00000000.1	representative genome	422296	1121252	Cucumibacter marinus DSM 18995	strain=DSM 18995		latest	Scaffold	Major	Full	2013-07-15	ASM42986v1	DOE Joint Genome Institute	GCA_000429865.1	identical	ftp://ftp.ncbi.nlm.nih.gov/genomes/all/GCF/000/429/865/GCF_000429865.1_ASM42986v1		assembly from type material	3713661	62.2	104	0.9905	1.0096	0.9814	1.0134	22	437622	4	182889	9	3574
GCF_000472705.1	PRJNA224116	SAMN02441124	AXAE00000000.1	representative genome	1040983	1777866	Mesorhizobium erdmanii USDA 3471	strain=USDA 3471		latest	Scaffold	Major	Full	2013-09-30	ASM47270v1	DOE Joint Genome Institute	GCA_000472705.1	identical	ftp://ftp.ncbi.nlm.nih.gov/genomes/all/GCF/000/472/705/GCF_000472705.1_ASM47270v1		assembly from type material	7023073	62.61	104	0.9905	1.0288	0.9814	1.0607	50	316419	8	77704	27	6714
GCF_000472985.1	PRJNA224116	SAMN02441114	AXAV00000000.1	na	1037409	375	Bradyrhizobium japonicum USDA 6	strain=USDA 6		latest	Scaffold	Major	Full	2013-09-30	ASM47298v1	DOE Joint Genome Institute	GCA_000472985.1	identical	ftp://ftp.ncbi.nlm.nih.gov/genomes/all/GCF/000/472/985/GCF_000472985.1_ASM47298v1		assembly from type material	9131141	63.67	104	0.9905	1.0096	0.9814	1.0227	87	328295	8	91243	29	8641
GCF_000473085.1	PRJNA224116	SAMN02440776	AXBA00000000.1	representative genome	1038858	281091	Azorhizobium doebereinerae UFLA1-100	strain=UFLA1-100		latest	Scaffold	Major	Full	2013-09-30	ASM47308v1	DOE Joint Genome Institute	GCA_000473085.1	identical	ftp://ftp.ncbi.nlm.nih.gov/genomes/all/GCF/000/473/085/GCF_000473085.1_ASM47308v1		assembly from type material	5817514	68.89	104	0.9905	1.0096	0.9814	1.0239	104	174279	12	42826	38	5341
GCF_000496075.1	PRJNA224116	SAMN02469419	AWXZ00000000.1	representative genome	631454	1358440	Lutibaculum baratangense AMV1	strain=AMV1		latest	Contig	Major	Full	2013-11-07	LuBa1.0	Centre for Cellular and Molecular Biology	GCA_000496075.1	identical	ftp://ftp.ncbi.nlm.nih.gov/genomes/all/GCF/000/496/075/GCF_000496075.1_LuBa1.0		assembly from type material	4300776	68.58	105	1	1.0095	1	1.022	44	224142	7	91308	19	4081
GCF_000503895.1	PRJNA224116	SAMN02641510		representative genome	1029756	1427356	Hyphomicrobium nitrativorans NL23	strain=NL23		latest	Complete Genome	Major	Full	2013-12-04	ASM50389v1	INRS-Institut Armand-Frappier	GCA_000503895.1	identical	ftp://ftp.ncbi.nlm.nih.gov/genomes/all/GCF/000/503/895/GCF_000503895.1_ASM50389v1		assembly from type material	3653837	63.88	102	0.9714	1.0098	0.9811	1.0002	1	3653837	1	3653837	1	3423
GCF_000518085.1	PRJNA224116	SAMN02585012	JACX00000000.1	na	1415777	33045	Bartonella grahamii ATCC 700132	strain=ATCC 700132		latest	Scaffold	Major	Full	2014-01-13	ASM51808v1	DOE Joint Genome Institute	GCA_000518085.1	identical	ftp://ftp.ncbi.nlm.nih.gov/genomes/all/GCF/000/518/085/GCF_000518085.1_ASM51808v1		assembly from type material	2198488	37.89	104	0.9905	1	0.9814	1	66	117680	6	21194	23	1888
GCF_000518105.1	PRJNA224116	SAMN02585010	JACY00000000.1	na	1408318	33047	Bartonella vinsonii subsp. berkhoffii ATCC 51672	strain=ATCC 51672		latest	Scaffold	Major	Full	2014-01-13	ASM51810v1	DOE Joint Genome Institute	GCA_000518105.1	identical	ftp://ftp.ncbi.nlm.nih.gov/genomes/all/GCF/000/518/105/GCF_000518105.1_ASM51810v1		assembly from type material	1787929	38.85	104	0.9905	1	0.9814	1	64	141204	5	17191	18	1666
GCF_000518165.1	PRJNA224116	SAMN02585007	JADB00000000.1	na	1094555	807	Bartonella elizabethae F9251 = ATCC 49927	strain=ATCC 49927		latest	Scaffold	Major	Full	2014-01-13	ASM51816v1	DOE Joint Genome Institute	GCA_000518165.1	identical	ftp://ftp.ncbi.nlm.nih.gov/genomes/all/GCF/000/518/165/GCF_000518165.1_ASM51816v1		assembly from type material	1963970	38.23	104	0.9905	1	0.9814	1	39	279953	3	33389	14	1663
GCF_000518185.1	PRJNA224116	SAMN02585005	JADC00000000.1	na	1408425	56426	Bartonella clarridgeiae ATCC 51734	strain=ATCC 51734		latest	Scaffold	Major	Full	2014-01-13	ASM51818v1	DOE Joint Genome Institute	GCA_000518185.1	identical	ftp://ftp.ncbi.nlm.nih.gov/genomes/all/GCF/000/518/185/GCF_000518185.1_ASM51818v1		assembly from type material	1492589	35.59	104	0.9905	1	0.9814	1	17	254734	3	47924	7	1238
GCF_000518585.1	PRJNA224116	SAMN02584975	JADW00000000.1	na	1367849	160699	Agrobacterium larrymoorei AF3.10 = ATCC 51759	strain=ATCC 51759		latest	Scaffold	Major	Full	2014-01-13	ASM51858v1	DOE Joint Genome Institute	GCA_000518585.1	identical	ftp://ftp.ncbi.nlm.nih.gov/genomes/all/GCF/000/518/585/GCF_000518585.1_ASM51858v1		assembly from type material	5163333	57.19	105	1	1	1	1	74	152898	10	31718	38	4910
GCF_000518665.1	PRJNA224116	SAMN02584970	JAEA00000000.1	representative genome	1336243	217168	Microvirga flocculans ATCC BAA-817	strain=ATCC BAA-817		latest	Scaffold	Major	Full	2014-01-13	ASM51866v1	DOE Joint Genome Institute	GCA_000518665.1	identical	ftp://ftp.ncbi.nlm.nih.gov/genomes/all/GCF/000/518/665/GCF_000518665.1_ASM51866v1		assembly from type material	4029781	64.26	105	1	1.0095	1	1.0235	30	282207	6	64579	14	3844
GCF_000518785.1	PRJNA224116	SAMN02584964	JAEG00000000.1	representative genome	1336235	448181	Rhizobium selenitireducens ATCC BAA-1503	strain=ATCC BAA-1503		latest	Scaffold	Major	Full	2014-01-13	ASM51878v1	DOE Joint Genome Institute	GCA_000518785.1	identical	ftp://ftp.ncbi.nlm.nih.gov/genomes/all/GCF/000/518/785/GCF_000518785.1_ASM51878v1		assembly from type material	4976687	63.49	104	0.9905	1.0096	0.9998	1.0255	29	500130	4	125287	13	4717
GCF_000526895.1	PRJNA224116	SAMN02585002	JAGY00000000.1	na	1094553	33044	Bartonella doshiae NCTC 12862 = ATCC 700133	strain=ATCC 700133		latest	Contig	Major	Full	2014-01-14	ASM52689v1	DOE Joint Genome Institute	GCA_000526895.1	identical	ftp://ftp.ncbi.nlm.nih.gov/genomes/all/GCF/000/526/895/GCF_000526895.1_ASM52689v1		assembly from type material	1765051	37.86	104	0.9905	1	0.9814	1	39	117444	6	28099	16	1569
GCF_000577275.2	PRJNA224116	SAMEA3138925	CBYB000000000.1	representative genome	348824	348824	Rhizobium favelukesii	strain=LPU83		latest	Chromosome	Major	Full	2014-02-11	LPU83	CEBITEC	GCA_000577275.2	identical	ftp://ftp.ncbi.nlm.nih.gov/genomes/all/GCF/000/577/275/GCF_000577275.2_LPU83		assembly from type material	7569648	59.65	103	0.981	1.0291	0.9813	1.0383	62	4195305	1	759787	3	7699
GCF_000615975.1	PRJNA224116	SAMD00013635	BAMP00000000.1	representative genome	1231185	204799	Nitratireductor aquibiodomus NL21 = JCM 21793	strain=JCM 21793		latest	Contig	Major	Full	2014-03-31	ASM61597v1	The University of Tokyo	GCA_000615975.1	identical	ftp://ftp.ncbi.nlm.nih.gov/genomes/all/GCF/000/615/975/GCF_000615975.1_ASM61597v1		assembly from type material	4516452	61.34	102	0.9714	1.0196	0.9553	1.0021	207	40247	34	12274	113	5027
GCF_000621665.1	PRJNA224116	SAMN02744004	JHXQ00000000.1	representative genome	1370122	78527	Rhizobium undicola ORS 992 = ATCC 700741	strain=ATCC 700741		latest	Scaffold	Major	Full	2014-04-08	ASM62166v1	DOE Joint Genome Institute	GCA_000621665.1	identical	ftp://ftp.ncbi.nlm.nih.gov/genomes/all/GCF/000/621/665/GCF_000621665.1_ASM62166v1		assembly from type material	4133860	59.32	103	0.981	1.0097	0.9813	1.0239	49	170604	7	56094	22	3724
GCF_000636015.1	PRJNA224116	SAMN02375020	JFZJ00000000.1	representative genome	858455	1202716	Rhodomicrobium udaipurense JA643	strain=JA643		latest	Contig	Major	Full	2014-04-22	ASM63601v1	University of Hyderabad	GCA_000636015.1	identical	ftp://ftp.ncbi.nlm.nih.gov/genomes/all/GCF/000/636/015/GCF_000636015.1_ASM63601v1		assembly from type material	3631113	62.47	104	0.9905	1.0096	0.9814	1.0239	256	26179	43	7773	148	3487
GCF_000662035.2	PRJNA224116	SAMN02427356	AZBH00000000.2	na	520457	120577	Brucella ceti B1/94	strain=B1/94		latest	Contig	Major	Full	2014-07-15	Bceti2.0	Smi	GCA_000662035.2	identical	ftp://ftp.ncbi.nlm.nih.gov/genomes/all/GCF/000/662/035/GCF_000662035.2_Bceti2.0		assembly from type material	3272897	57.25	102	0.9714	1.0196	0.9739	1.0193	206	29208	36	9036	111	3367
GCF_000688235.1	PRJNA224116	SAMN02743896	JHYO00000000.1	representative genome	1123355	64973	Terasakiella pusilla DSM 6293	strain=DSM 6293		latest	Contig	Major	Full	2014-04-08	ASM68823v1	DOE Joint Genome Institute	GCA_000688235.1	identical	ftp://ftp.ncbi.nlm.nih.gov/genomes/all/GCF/000/688/235/GCF_000688235.1_ASM68823v1		assembly from type material	4053560	50.02	105	1	1	1	1	85	130826	12	33457	36	3978
GCF_000688515.1	PRJNA224116	SAMN02743903	JHZK00000000.1	representative genome	1120956	209897	Afifella pfennigii DSM 17143	strain=DSM 17143		latest	Scaffold	Major	Full	2014-04-08	ASM68851v1	DOE Joint Genome Institute	GCA_000688515.1	identical	ftp://ftp.ncbi.nlm.nih.gov/genomes/all/GCF/000/688/515/GCF_000688515.1_ASM68851v1		assembly from type material	3872586	66.6	105	1	1.0095	1	1.0001	60	102055	10	28970	34	3738
GCF_000696095.1	PRJNA224116	SAMD00016801	BAYX00000000.1	na	1220581	359	Agrobacterium rhizogenes NBRC 13257	strain=NBRC 13257		latest	Contig	Major	Full	2014-05-17	ASM69609v1	National Institute of Technology and Evaluation	GCA_000696095.1	identical	ftp://ftp.ncbi.nlm.nih.gov/genomes/all/GCF/000/696/095/GCF_000696095.1_ASM69609v1		assembly from type material	7044473	59.91	105	1	1.0476	1	1.0582	53	475718	7	107464	19	6599
GCF_000697965.2	PRJNA224116	SAMN02781308		representative genome	106592	106592	Ensifer adhaerens	strain=Casida A		latest	Complete Genome	Major	Full	2016-06-16	ASM69796v2	University of Arizona	GCA_000697965.2	identical	ftp://ftp.ncbi.nlm.nih.gov/genomes/all/GCF/000/697/965/GCF_000697965.2_ASM69796v2		assembly from type material	7267502	62.32	104	0.9905	1.0288	0.9998	1.0396	3	4071185	1	1459374	3	6840
GCF_000705355.1	PRJNA224116	SAMN02743500	JMQK00000000.1	representative genome	1496690	1496690	Rhizobium marinum	strain=MGL06		latest	Contig	Major	Full	2014-06-12	SOAPdenovo for version 1.05 of Rhizobium marinus MGL06	85303	GCA_000705355.1	identical	ftp://ftp.ncbi.nlm.nih.gov/genomes/all/GCF/000/705/355/GCF_000705355.1_SOAPdenovo_for_version_1.05_of_Rhizobium_marinus_MGL06		assembly from type material	5061979	63.03	105	1	1.019	1	1.0432	87	182654	8	53691	28	4933
GCF_000706625.1	PRJNA224116	SAMN00778953	AHPL00000000.1	representative genome	1134510	92181	Bartonella koehlerae C-29	strain=C-29		latest	Scaffold	Major	Full	2014-06-17	Bart_koeh_C29_V1	Broad Institute	GCA_000706625.1	identical	ftp://ftp.ncbi.nlm.nih.gov/genomes/all/GCF/000/706/625/GCF_000706625.1_Bart_koeh_C29_V1		assembly from type material	1747106	37.43	104	0.9905	1	0.9814	1	3	1737518	1	1737518	1	1460
GCF_000706645.1	PRJNA224116	SAMN00778952	AHPK00000000.1	representative genome	685782	395923	Bartonella rochalimae ATCC BAA-1498	strain=ATCC BAA-1498		latest	Scaffold	Major	Full	2014-06-17	Bart_roch_BMGH_V1	Broad Institute	GCA_000706645.1	identical	ftp://ftp.ncbi.nlm.nih.gov/genomes/all/GCF/000/706/645/GCF_000706645.1_Bart_roch_BMGH_V1		assembly from type material	1534143	35.05	104	0.9905	1	0.9814	1	3	1097474	1	411078	2	1298
GCF_000712255.1	PRJNA224116	SAMN02427357	AZBJ00000000.2	na	520456	29460	Brucella neotomae 5K33	strain=5K33		latest	Contig	Major	Full	2014-07-15	Bneotomae2.0	Smi	GCA_000712255.2	identical	ftp://ftp.ncbi.nlm.nih.gov/genomes/all/GCF/000/712/255/GCF_000712255.1_Bneotomae2.0		assembly from type material	3289681	57.23	104	0.9905	1.0288	0.9998	1.0404	177	34109	30	10700	96	3357
GCF_000722615.1	PRJNA224116	SAMN02864219	JOKI00000000.1	representative genome	1509405	1509405	Pseudorhizobium pelagicum	strain=R1-200B4		latest	Contig	Major	Full	2014-07-07	ASM72261v1	University Miguel Hernandez	GCA_000722615.1	identical	ftp://ftp.ncbi.nlm.nih.gov/genomes/all/GCF/000/722/615/GCF_000722615.1_ASM72261v1		assembly from type material	5134606	62.81	105	1	1.0381	1	1.0922	62	184300	11	39949	33	4968
GCF_000731315.1	PRJNA224116	SAMEA3139073		representative genome	1028800	399	Neorhizobium galegae bv. orientalis str. HAMBI 540	strain=HAMBI 540		latest	Complete Genome	Major	Full	2014-06-25	RG540_Ch_pA	UH	GCA_000731315.1	identical	ftp://ftp.ncbi.nlm.nih.gov/genomes/all/GCF/000/731/315/GCF_000731315.1_RG540_Ch_pA		assembly from type material	6455027	61.23	102	0.9714	1.0196	0.972	1.0229	2	4647962	1	1807065	2	6172
GCF_000732195.1	PRJNA224116	SAMN02840656	JNNU00000000.1	representative genome	690585	690585	Rhizobium vignae	strain=CCBAU 05176		latest	Contig	Major	Full	2014-07-21	ASM73219v1	85303	GCA_000732195.1	identical	ftp://ftp.ncbi.nlm.nih.gov/genomes/all/GCF/000/732/195/GCF_000732195.1_ASM73219v1		assembly from type material	6343049	61.62	104	0.9905	1.0192	0.9998	1.0324	84	328448	7	69534	23	6102
GCF_000739695.1	PRJNA224116	SAMD00017759	BBIO00000000.1	representative genome	1333998	1333998	Tepidicaulis marinus	strain=MA2		latest	Contig	Major	Full	2014-07-15	ASM73969v1	National Institute of Advanced Industrial Science and Technology. Japan	GCA_000739695.1	identical	ftp://ftp.ncbi.nlm.nih.gov/genomes/all/GCF/000/739/695/GCF_000739695.1_ASM73969v1		assembly from type material	3475736	61.1	104	0.9905	1	0.9814	1	46	167542	7	56410	20	3372
GCF_000739935.1	PRJNA224116	SAMD00016892	BBJU00000000.1	representative genome	1368415	28099	Agrobacterium rubi TR3 = NBRC 13261	strain=NBRC 13261		latest	Contig	Major	Full	2014-08-02	ASM73993v1	National Institute of Technology and Evaluation	GCA_000739935.1	identical	ftp://ftp.ncbi.nlm.nih.gov/genomes/all/GCF/000/739/935/GCF_000739935.1_ASM73993v1		assembly from type material	5293384	57.29	103	0.981	1	0.9813	1	56	178389	10	60264	27	5000
GCF_000740335.1	PRJNA224116	SAMN02795942		na	36855	36855	Brucella canis	strain=RM6/66		latest	Complete Genome	Major	Full	2014-08-15	ASM74033v1	Los Alamos National Laboratory	GCA_000740335.1	identical	ftp://ftp.ncbi.nlm.nih.gov/genomes/all/GCF/000/740/335/GCF_000740335.1_ASM74033v1		assembly from type material	3312751	57.24	105	1	1.0095	1	1.0121	2	2105950	1	1206801	2	3114
GCF_000740415.1	PRJNA224116	SAMN02795970		na	224914	29459	Brucella melitensis bv. 1 str. 16M	strain=16M		latest	Complete Genome	Major	Full	2014-08-15	ASM74041v1	Los Alamos National Laboratory	GCA_000740415.1	identical	ftp://ftp.ncbi.nlm.nih.gov/genomes/all/GCF/000/740/415/GCF_000740415.1_ASM74041v1		assembly from type material	3294775	57.22	105	1	1.0095	1	1.0121	2	2116984	1	1177791	2	3140
GCF_000742005.1	PRJNA224116	SAMN02777545	JMUC00000000.1	na	204722	29461	Brucella suis 1330	strain=1330		latest	Scaffold	Major	Full	2014-08-19	ASM74200v1	Los Alamos National Laboratory	GCA_000742005.1	identical	ftp://ftp.ncbi.nlm.nih.gov/genomes/all/GCF/000/742/005/GCF_000742005.1_ASM74200v1		assembly from type material	3296001	57.25	105	1	1.0095	1	1.0121	2	2099556	1	1196445	2	3105
GCF_000742255.1	PRJNA224116	SAMN02768006	JMSC00000000.1	representative genome	520456	29460	Brucella neotomae 5K33	strain=5K33		latest	Scaffold	Major	Full	2014-08-19	ASM74225v1	Los Alamos National Laboratory	GCA_000742255.1	identical	ftp://ftp.ncbi.nlm.nih.gov/genomes/all/GCF/000/742/255/GCF_000742255.1_ASM74225v1		assembly from type material	3329464	57.22	105	1	1.0095	1	1.0121	1	3329464	1	3329464	1	3196
GCF_000743575.1	PRJNA224116	SAMN02983206	JQGC00000000.1	representative genome	46914	46914	Devosia riboflavina	strain=IFO13584		latest	Contig	Major	Full	2014-08-25	ASM74357v1	Agriculture and Agri-Food Canada	GCA_000743575.1	identical	ftp://ftp.ncbi.nlm.nih.gov/genomes/all/GCF/000/743/575/GCF_000743575.1_ASM74357v1		assembly from type material	5052234	61.83	104	0.9905	1.0192	0.9814	1.017	113	209083	8	66269	24	5001
GCF_000745425.1	PRJNA224116	SAMN02910383	JQJH00000000.1	representative genome	231434	231434	Beijerinckia mobilis	strain=UQM 1969		latest	Scaffold	Major	Full	2014-08-28	ASM74542v1	DOE Joint Genome Institute	GCA_000745425.1	identical	ftp://ftp.ncbi.nlm.nih.gov/genomes/all/GCF/000/745/425/GCF_000745425.1_ASM74542v1		assembly from type material	4320537	57.21	105	1	1	1	1	57	193954	7	39782	25	3835
GCF_000746085.1	PRJNA224116	SAMN02746022	JQKO00000000.1	representative genome	663610	663610	Methylocapsa aurea	strain=KYG		latest	Scaffold	Major	Full	2014-08-28	ASM74608v1	DOE Joint Genome Institute	GCA_000746085.1	identical	ftp://ftp.ncbi.nlm.nih.gov/genomes/all/GCF/000/746/085/GCF_000746085.1_ASM74608v1		assembly from type material	3971247	61.33	105	1	1.0095	1	1.022	34	227045	6	63783	18	3580
GCF_000757795.1	PRJNA224116	SAMN03075686		representative genome	693986	334852	Methylobacterium oryzae CBMB20	strain=CBMB20		latest	Complete Genome	Major	Full	2014-09-25	ASM75779v1	KRIBB	GCA_000757795.1	identical	ftp://ftp.ncbi.nlm.nih.gov/genomes/all/GCF/000/757/795/GCF_000757795.1_ASM75779v1		assembly from type material	6286629	69.77	104	0.9905	1.0288	0.9745	1.0588	1	6286629	1	6286629	1	5806
GCF_000828475.1	PRJNA224116	SAMD00019677		representative genome	1384459	1384459	Methyloceanibacter caenitepidi	strain=Gela4		latest	Complete Genome	Major	Full	2015-01-06	ASM82847v1	National Institute of Advanced Industrial Science and Technology. Japan	GCA_000828475.1	identical	ftp://ftp.ncbi.nlm.nih.gov/genomes/all/GCF/000/828/475/GCF_000828475.1_ASM82847v1		assembly from type material	3424964	62.84	103	0.981	1	0.956	1	1	3424964	1	3424964	1	3294
GCF_000949865.1	PRJNA224116	SAMN03266536	JWJH00000000.1	representative genome	1368418	1035271	Rhizobium nepotum 39/7	strain=39/7		latest	Contig	Major	Full	2015-03-10	ASM94986v1	University of Belgrade. Faculty of Agriculture	GCA_000949865.1	identical	ftp://ftp.ncbi.nlm.nih.gov/genomes/all/GCF/000/949/865/GCF_000949865.1_ASM94986v1		assembly from type material	5328872	59.12	105	1	1	1	1	79	219533	9	29240	29	5006
GCF_000960975.1	PRJNA224116	SAMN03284753		representative genome	1486262	1486262	Martelella endophytica	strain=YC6887		latest	Complete Genome	Major	Full	2015-03-24	ASM96097v1	Gyeonsang National university	GCA_000960975.1	identical	ftp://ftp.ncbi.nlm.nih.gov/genomes/all/GCF/000/960/975/GCF_000960975.1_ASM96097v1		assembly from type material	4817335	62.14	103	0.981	1.0097	0.9813	1.0239	1	4817335	1	4817335	1	4459
GCF_000969415.1	PRJNA224116	SAMN03383337	JZEX00000000.1	representative genome	443610	443610	Devosia geojensis	strain=BD-c194		latest	Contig	Major	Full	2015-04-06	ASM96941v1	Agriculture and Agri-Food Canada	GCA_000969415.1	identical	ftp://ftp.ncbi.nlm.nih.gov/genomes/all/GCF/000/969/415/GCF_000969415.1_ASM96941v1		assembly from type material	4465063	65.92	104	0.9905	1	0.9814	1	207	57874	22	15866	78	4337
GCF_000969445.1	PRJNA224116	SAMN03383426	JZEY00000000.1	representative genome	429727	429727	Devosia chinhatensis	strain=IPL18		latest	Contig	Major	Full	2015-04-06	ASM96944v1	Agriculture and Agri-Food Canada	GCA_000969445.1	identical	ftp://ftp.ncbi.nlm.nih.gov/genomes/all/GCF/000/969/445/GCF_000969445.1_ASM96944v1		assembly from type material	3497719	62.35	105	1	1.019	1	1.0001	98	2139066	1	1309546	2	3397
GCF_000970435.1	PRJNA224116	SAMN03431279	LAJF00000000.1	representative genome	1121477	288995	Devosia limi DSM 17137	strain=DSM 17137		latest	Contig	Major	Full	2015-04-07	ASM97043v1	Agriculture and Agri-Food Canada	GCA_000970435.1	identical	ftp://ftp.ncbi.nlm.nih.gov/genomes/all/GCF/000/970/435/GCF_000970435.1_ASM97043v1		assembly from type material	4474336	62.71	104	0.9905	1.0192	0.9814	1.0178	158	131891	12	35532	38	4320
GCF_000970455.1	PRJNA224116	SAMN03431281	LAJG00000000.1	representative genome	361041	361041	Devosia soli	strain=GH2-10		latest	Contig	Major	Full	2015-04-07	ASM97045v1	Agriculture and Agri-Food Canada	GCA_000970455.1	identical	ftp://ftp.ncbi.nlm.nih.gov/genomes/all/GCF/000/970/455/GCF_000970455.1_ASM97045v1		assembly from type material	4136371	60.98	105	1	1.019	1	1.0172	48	378020	4	113675	10	4079
GCF_000970465.2	PRJNA224116	SAMN03431276	LAJE00000000.2	representative genome	1116389	408174	Devosia insulae DS-56	strain=DS-56		latest	Contig	Major	Full	2016-09-29	ASM97046v2	Agriculture and Agri-Food Canada	GCA_000970465.2	identical	ftp://ftp.ncbi.nlm.nih.gov/genomes/all/GCF/000/970/465/GCF_000970465.2_ASM97046v2		assembly from type material	5750119	65.26	105	1	1.019	1	1.0139	410	23675	71	6506	245	5695
GCF_000971275.1	PRJNA224116	SAMN03448634	LAPV00000000.1	representative genome	728005	728005	Devosia psychrophila	strain=Cr7-05		latest	Contig	Major	Full	2015-04-09	ASM97127v1	Agriculture and Agri-Food Canada	GCA_000971275.1	identical	ftp://ftp.ncbi.nlm.nih.gov/genomes/all/GCF/000/971/275/GCF_000971275.1_ASM97127v1		assembly from type material	4519556	61.09	105	1	1.0095	1	1.021	239	70191	19	15074	70	4602
GCF_000971295.1	PRJNA224116	SAMN03448481	LANJ00000000.1	representative genome	1293439	1293439	Devosia epidermidihirudinis	strain=E84		latest	Contig	Major	Full	2015-04-09	ASM97129v1	Agriculture and Agri-Food Canada	GCA_000971295.1	identical	ftp://ftp.ncbi.nlm.nih.gov/genomes/all/GCF/000/971/295/GCF_000971295.1_ASM97129v1		assembly from type material	3859784	61.08	104	0.9905	1.0096	0.9814	1.0134	47	309791	4	120442	11	3757
GCF_001006805.1	PRJNA224116	SAMEA3246152	CDSD00000000.1	representative genome	1033741	1033741	Microvirga massiliensis	strain=JC119		latest	Scaffold	Major	Full	2015-05-01	Microvirga massiliensis JC119	URMITE	GCA_001006805.1	identical	ftp://ftp.ncbi.nlm.nih.gov/genomes/all/GCF/001/006/805/GCF_001006805.1_Microvirga_massiliensis_JC119		assembly from type material	9172134	61.35	105	1	1.0571	1	1.0623	50	423941	7	122945	19	8974
GCF_001017175.1	PRJNA224116	SAMN03652542	LCYG00000000.1	representative genome	1225564	1225564	Microvirga vignae	strain=BR3299		latest	Scaffold	Major	Full	2015-06-01	ASM101717v1	Embrapa Agrobiologia	GCA_001017175.1	identical	ftp://ftp.ncbi.nlm.nih.gov/genomes/all/GCF/001/017/175/GCF_001017175.1_ASM101717v1		assembly from type material	6472445	61.05	105	1	1.0286	1	1.0465	165	99306	19	15544	83	6601
GCF_001043885.1	PRJNA224116	SAMN03282444	JXOD00000000.1	representative genome	1295136	427683	Methylobacterium platani JCM 14648	strain=JCM 14648		latest	Contig	Major	Full	2015-06-30	ASM104388v1	CSIR-Institute of Microbial Technology	GCA_001043885.1	identical	ftp://ftp.ncbi.nlm.nih.gov/genomes/all/GCF/001/043/885/GCF_001043885.1_ASM104388v1		assembly from type material	6851766	71.07	103	0.981	1.0291	0.9743	1.0512	554	23491	87	7494	277	6519
GCF_001043895.1	PRJNA224116	SAMN03217758	JTHF00000000.1	representative genome	1775910	1775910	Methylobacterium indicum	strain=SE2.11		latest	Contig	Major	Full	2015-06-30	ASM104389v1	CSIR-Institute of Microbial Technology	GCA_001043895.1	identical	ftp://ftp.ncbi.nlm.nih.gov/genomes/all/GCF/001/043/895/GCF_001043895.1_ASM104389v1		assembly from type material	6921653	70.41	101	0.9619	1.0099	0.928	1.024	506	28044	77	7378	253	6549
GCF_001043915.1	PRJNA224116	SAMN03401149	LABX00000000.1	na	270351	270351	Methylobacterium aquaticum	strain=DSM 16371		latest	Contig	Major	Full	2015-06-30	ASM104391v1	CSIR-Institute of Microbial Technology	GCA_001043915.1	identical	ftp://ftp.ncbi.nlm.nih.gov/genomes/all/GCF/001/043/915/GCF_001043915.1_ASM104391v1		assembly from type material	7425331	69.88	101	0.9619	1.0495	0.9413	1.0559	512	32100	75	9510	237	6961
GCF_001043955.1	PRJNA224116	SAMN03406606	LABZ00000000.1	representative genome	1187852	1187852	Methylobacterium tarhaniae	strain=DSM 25844		latest	Contig	Major	Full	2015-06-30	ASM104395v1	CSIR-Institute of Microbial Technology	GCA_001043955.1	identical	ftp://ftp.ncbi.nlm.nih.gov/genomes/all/GCF/001/043/955/GCF_001043955.1_ASM104395v1		assembly from type material	6743422	70.41	101	0.9619	1.0099	0.9649	1.0231	483	35164	61	9618	198	6348
GCF_001043975.1	PRJNA224116	SAMN03406604	LABY00000000.1	representative genome	298794	298794	Methylobacterium variabile	strain=DSM 16961		latest	Contig	Major	Full	2015-06-30	ASM104397v1	CSIR-Institute of Microbial Technology	GCA_001043975.1	identical	ftp://ftp.ncbi.nlm.nih.gov/genomes/all/GCF/001/043/975/GCF_001043975.1_ASM104397v1		assembly from type material	7433592	70.73	101	0.9619	1.0297	0.9597	1.0406	562	32726	71	8905	227	7204
GCF_001050155.1	PRJNA224116	SAMN03768409	LFVY00000000.1	representative genome	1670619	1670619	Nitratireductor soli	strain=ZZ-1		latest	Contig	Major	Full	2015-07-08	ASM105015v1	Zaozhuang University	GCA_001050155.1	identical	ftp://ftp.ncbi.nlm.nih.gov/genomes/all/GCF/001/050/155/GCF_001050155.1_ASM105015v1		assembly from type material	5125657	64.1	103	0.981	1.0097	0.9732	1.0003	60	245950	8	88984	21	4918
GCF_001050495.1	PRJNA224116	SAMEA3146248	CAHM00000000.1	na	1033741	1033741	Microvirga massiliensis		JC119	latest	Contig	Major	Full	2013-10-09	ASM105049v1	URMITE CNRS UMR 6236 IRD 198	GCA_001050495.1	identical	ftp://ftp.ncbi.nlm.nih.gov/genomes/all/GCF/001/050/495/GCF_001050495.1_ASM105049v1		assembly from type material	9043523	62.62	105	1	1.0571	1	1.0623	474	49785	55	9075	217	9123
GCF_001187535.1	PRJNA224116	SAMN03779945	LFIO00000000.1	representative genome	1671795	1671795	Rhizobium ecuadorense	strain=CNPSO 671		latest	Contig	Major	Full	2015-07-27	ASM118753v1	Embrapa Soja	GCA_001187535.1	identical	ftp://ftp.ncbi.nlm.nih.gov/genomes/all/GCF/001/187/535/GCF_001187535.1_ASM118753v1		assembly from type material	7383497	61.01	103	0.981	1.0583	0.9813	1.1221	1891	130817	16	13034	83	8290
GCF_001189235.2	PRJNA224116	SAMN03782074	LFIP00000000.2	representative genome	630921	630921	Bradyrhizobium embrapense	strain=SEMIA 6208		latest	Contig	Major	Full	2016-05-09	ASM118923v2	Embrapa Soja	GCA_001189235.2	identical	ftp://ftp.ncbi.nlm.nih.gov/genomes/all/GCF/001/189/235/GCF_001189235.2_ASM118923v2		assembly from type material	8267832	63.98	104	0.9905	1.0577	0.9814	1.0992	36	809967	4	139684	12	7736
GCF_001189245.1	PRJNA224116	SAMN03782120	LFIQ00000000.1	representative genome	280333	280333	Bradyrhizobium pachyrhizi	strain=PAC 48		latest	Scaffold	Major	Full	2015-07-30	ASM118924v1	Embrapa Soja	GCA_001189245.1	identical	ftp://ftp.ncbi.nlm.nih.gov/genomes/all/GCF/001/189/245/GCF_001189245.1_ASM118924v1		assembly from type material	8711973	63.72	103	0.981	1.0388	0.9539	1.0555	124	202254	15	59385	45	8250
GCF_001189845.1	PRJNA224116	SAMN03784761	LFLZ00000000.1	representative genome	312253	312253	Bradyrhizobium tropiciagri	strain=SEMIA 6148		latest	Contig	Major	Full	2015-07-31	ASM118984v1	Embrapa Soja	GCA_001189845.1	identical	ftp://ftp.ncbi.nlm.nih.gov/genomes/all/GCF/001/189/845/GCF_001189845.1_ASM118984v1		assembly from type material	9767314	63.49	103	0.981	1.0777	0.9647	1.0956	189	111450	28	28427	94	9391
GCF_001238275.1	PRJNA224116	SAMN03890369	LGTB00000000.1	representative genome	1654716	1654716	Bradyrhizobium viridifuturi	strain=SEMIA 690		latest	Contig	Major	Full	2015-08-05	ASM123827v1	Embrapa Soja	GCA_001238275.1	identical	ftp://ftp.ncbi.nlm.nih.gov/genomes/all/GCF/001/238/275/GCF_001238275.1_ASM123827v1		assembly from type material	8811922	64.02	104	0.9905	1.0577	0.9814	1.0964	152	138766	22	50014	58	8844
GCF_001281405.1	PRJNA224116	SAMN02803869		representative genome	1318743	1318743	Bartonella ancashensis	strain=20.00		latest	Complete Genome	Major	Full	2015-09-14	ASM128140v1	Walter Reed Army Institute of Research	GCA_001281405.1	identical	ftp://ftp.ncbi.nlm.nih.gov/genomes/all/GCF/001/281/405/GCF_001281405.1_ASM128140v1		assembly from type material	1467695	38.42	104	0.9905	1	0.9814	1	1	1467695	1	1467695	1	1255
GCF_001305515.1	PRJNA224116	SAMN03703222	LJYW00000000.1	representative genome	665126	665126	Prosthecomicrobium hirschii	strain=16		latest	Scaffold	Major	Full	2015-10-01	ASM130551v1	University of Missouri	GCA_001305515.1	identical	ftp://ftp.ncbi.nlm.nih.gov/genomes/all/GCF/001/305/515/GCF_001305515.1_ASM130551v1		assembly from type material	6484983	68.61	104	0.9905	1	0.9814	1	6	6323789	1	6323789	1	5765
GCF_001402875.1	PRJNA224116	SAMN04123293		representative genome	1079	1079	Blastochloris viridis	strain=ATCC 19567		latest	Complete Genome	Major	Full	2015-10-22	ASM140287v1	Institute for Basic Science	GCA_001402875.1	identical	ftp://ftp.ncbi.nlm.nih.gov/genomes/all/GCF/001/402/875/GCF_001402875.1_ASM140287v1		assembly from type material	3724841	67.93	104	0.9905	1	0.9814	1	1	3724841	1	3724841	1	3271
GCF_001418005.1	PRJNA224116	SAMN03840667	LIOL00000000.1	representative genome	363953	363953	Chelatococcus sambhunathii	strain=DSM 18167		latest	Scaffold	Major	Full	2015-10-28	ASM141800v1	Joint Genome Institute	GCA_001418005.1	identical	ftp://ftp.ncbi.nlm.nih.gov/genomes/all/GCF/001/418/005/GCF_001418005.1_ASM141800v1		assembly from type material	4373820	67.75	105	1	1.019	1	1.0242	35	426134	4	84745	13	4169
GCF_001440035.1	PRJNA224116	SAMN04088902	LJYG00000000.1	representative genome	989370	989370	Bradyrhizobium manausense	strain=BR 3351		latest	Scaffold	Major	Full	2015-11-06	ABySSBR3351v1	Embrapa Agrobiologia	GCA_001440035.1	identical	ftp://ftp.ncbi.nlm.nih.gov/genomes/all/GCF/001/440/035/GCF_001440035.1_ABySSBR3351v1		assembly from type material	9145311	62.78	103	0.981	1.0291	0.9763	1.0654	127	225542	13	47046	51	8735
GCF_001440395.1	PRJNA224116	SAMN02689491	LLXZ00000000.1	representative genome	280332	280332	Bradyrhizobium jicamae	strain=PAC68		latest	Scaffold	Major	Full	2015-11-06	ASM144039v1	UPM	GCA_001440395.1	identical	ftp://ftp.ncbi.nlm.nih.gov/genomes/all/GCF/001/440/395/GCF_001440395.1_ASM144039v1		assembly from type material	8738846	62.22	104	0.9905	1.0385	0.9814	1.0765	235	84855	32	22567	108	8497
GCF_001440405.1	PRJNA224116	SAMN02688507	LLXX00000000.1	representative genome	1518501	1518501	Bradyrhizobium valentinum	strain=LmjM3		latest	Scaffold	Major	Full	2015-11-06	ASM144040v1	UPM	GCA_001440405.1	identical	ftp://ftp.ncbi.nlm.nih.gov/genomes/all/GCF/001/440/405/GCF_001440405.1_ASM144040v1		assembly from type material	8845258	61.78	104	0.9905	1.0385	0.9814	1.0487	242	72962	36	20266	121	8740
GCF_001440415.1	PRJNA224116	SAMN02689496	LLYA00000000.1	representative genome	1300035	1300035	Bradyrhizobium retamae	strain=Ro19		latest	Contig	Major	Full	2015-11-06	ASM144041v1	UPM	GCA_001440415.1	identical	ftp://ftp.ncbi.nlm.nih.gov/genomes/all/GCF/001/440/415/GCF_001440415.1_ASM144041v1		assembly from type material	8466225	61.86	103	0.981	1.0388	0.9813	1.0726	235	131222	17	18991	74	8344
GCF_001440475.1	PRJNA224116	SAMN02689497	LLYB00000000.1	na	722472	722472	Bradyrhizobium lablabi	strain=CCBAU 23086		latest	Scaffold	Major	Full	2015-11-06	ASM144047v1	UPM	GCA_001440475.1	identical	ftp://ftp.ncbi.nlm.nih.gov/genomes/all/GCF/001/440/475/GCF_001440475.1_ASM144047v1		assembly from type material	8817291	62.49	104	0.9905	1.0288	0.9814	1.033	135	160353	17	33805	67	8553
GCF_001461695.1	PRJNA224116	SAMN04301590	AUTC00000000.1	na	1230631	380	Sinorhizobium fredii USDA 205	strain=USDA 205		latest	Contig	Major	Full	2015-12-07	ASM146169v1	Huazhong Agricultural University	GCA_001461695.1	identical	ftp://ftp.ncbi.nlm.nih.gov/genomes/all/GCF/001/461/695/GCF_001461695.1_ASM146169v1		assembly from type material	6579820	62.31	103	0.981	1.0194	0.9813	1.0191	209	102976	17	18039	75	6285
GCF_001463825.1	PRJNA224116	SAMD00028746	BBWN00000000.1	na	182270	182270	Aurantimonas coralicida	strain=DSM 14790		latest	Contig	Major	Full	2015-11-09	ASM146382v1	Graduate School of Life Sciences. Tohoku University	GCA_001463825.1	identical	ftp://ftp.ncbi.nlm.nih.gov/genomes/all/GCF/001/463/825/GCF_001463825.1_ASM146382v1		assembly from type material	4603216	66.73	104	0.9905	1.0385	0.9814	1.052	93	181777	8	38492	28	4358
GCF_001463845.1	PRJNA224116	SAMD00028750	BBWO00000000.1	na	217511	217511	Fulvimarina pelagi	strain=DSM 15513		latest	Contig	Major	Full	2015-11-09	ASM146384v1	Graduate School of Life Sciences. Tohoku University	GCA_001463845.1	identical	ftp://ftp.ncbi.nlm.nih.gov/genomes/all/GCF/001/463/845/GCF_001463845.1_ASM146384v1		assembly from type material	3770082	61.25	103	0.981	1	0.9732	1	61	313774	5	106810	13	3522
GCF_001463865.1	PRJNA224116	SAMD00028747	BBWP00000000.1	na	287752	651183	Aurantimonas manganoxydans SI85-9A1	strain=DSM 21871		latest	Contig	Major	Full	2015-11-09	ASM146386v1	Graduate School of Life Sciences. Tohoku University	GCA_001463865.1	identical	ftp://ftp.ncbi.nlm.nih.gov/genomes/all/GCF/001/463/865/GCF_001463865.1_ASM146386v1		assembly from type material	4248252	66.79	104	0.9905	1.0288	0.9814	1.052	94	161406	9	29349	37	3969
GCF_001463885.1	PRJNA224116	SAMD00028748	BBWQ00000000.1	representative genome	370622	370622	Aureimonas altamirensis	strain=DSM 21988		latest	Contig	Major	Full	2015-11-09	ASM146388v1	Graduate School of Life Sciences. Tohoku University	GCA_001463885.1	identical	ftp://ftp.ncbi.nlm.nih.gov/genomes/all/GCF/001/463/885/GCF_001463885.1_ASM146388v1		assembly from type material	4187548	64.85	104	0.9905	1.0288	0.9814	1.052	32	305097	6	73064	15	3964
GCF_001463905.1	PRJNA224116	SAMD00028696	BBWR00000000.1	representative genome	424757	424757	Aureimonas frigidaquae	strain=JCM 14755		latest	Contig	Major	Full	2015-11-09	ASM146390v1	Graduate School of Life Sciences. Tohoku University	GCA_001463905.1	identical	ftp://ftp.ncbi.nlm.nih.gov/genomes/all/GCF/001/463/905/GCF_001463905.1_ASM146390v1		assembly from type material	4098233	66.08	104	0.9905	1.0192	0.9814	1.035	30	256739	5	160206	13	3832
GCF_001463945.1	PRJNA224116	SAMD00028749	BBWT00000000.1	na	1121028	401562	Aureimonas ureilytica DSM 18598 = NBRC 106430	strain=NBRC 106430		latest	Contig	Major	Full	2015-11-09	ASM146394v1	Graduate School of Life Sciences. Tohoku University	GCA_001463945.1	identical	ftp://ftp.ncbi.nlm.nih.gov/genomes/all/GCF/001/463/945/GCF_001463945.1_ASM146394v1		assembly from type material	5097296	67.26	104	0.9905	1.0577	0.9814	1.0849	106	157113	11	35758	39	4803
GCF_001517345.1	PRJNA224116	SAMN03840667	CYHC00000000.1	na	363953	363953	Chelatococcus sambhunathii	strain=DSM 18167		latest	Scaffold	Major	Full	2016-01-13	JGI assembly	DOE - Joint Genome Institute	GCA_001517345.1	identical	ftp://ftp.ncbi.nlm.nih.gov/genomes/all/GCF/001/517/345/GCF_001517345.1_JGI_assembly		assembly from type material	4373820	67.75	105	1	1.019	1	1.0242	35	426134	4	84745	13	4169
GCF_001525625.2	PRJNA224116	SAMN03996256	LRIJ00000000.2	na	283166	38323	Bartonella henselae str. Houston-1	strain=FDAARGOS_175		latest	Contig	Major	Full	2018-01-19	ASM152562v2	University of Maryland School of Medicine Institute for Genome Sciences (IGS) - sequencing center	GCA_001525625.2	identical	ftp://ftp.ncbi.nlm.nih.gov/genomes/all/GCF/001/525/625/GCF_001525625.2_ASM152562v2		assembly from type material	2014752	38.25	104	0.9905	1.0288	0.9814	1.0244	2	1979779	1	1979779	1	1702
GCF_001541305.1	PRJNA224116	SAMN04226578	LMVJ00000000.1	na	358	358	Agrobacterium tumefaciens	strain=NCPPB 3001		latest	Contig	Major	Full	2016-01-26	ASM154130v1	Monash University Malaysia	GCA_001541305.1	identical	ftp://ftp.ncbi.nlm.nih.gov/genomes/all/GCF/001/541/305/GCF_001541305.1_ASM154130v1		assembly from synonym type material	5497300	59.35	105	1	1	1	1	22	480726	3	155155	11	5228
GCF_001541315.1	PRJNA224116	SAMN04223554	LMVK00000000.1	na	1183423	358	Agrobacterium tumefaciens str. B6	strain=B6		latest	Contig	Major	Full	2016-01-26	ASM154131v1	Monash University Malaysia	GCA_001541315.1	identical	ftp://ftp.ncbi.nlm.nih.gov/genomes/all/GCF/001/541/315/GCF_001541315.1_ASM154131v1		assembly from synonym type material	5657766	59.31	105	1	1	1	1	52	254976	6	87341	21	5410
GCF_001541345.2	PRJNA224116	SAMN04223557	LMVL00000000.2	na	373	373	Agrobacterium vitis	strain=NCPPB 3554		latest	Scaffold	Major	Full	2018-07-23	ASM154134v2	Monash University Malaysia	GCA_001541345.2	identical	ftp://ftp.ncbi.nlm.nih.gov/genomes/all/GCF/001/541/345/GCF_001541345.2_ASM154134v2		assembly from type material	5754491	57.55	103	0.981	1	0.9813	1	22	999201	3	200897	9	5161
GCF_001542405.1	PRJNA224116	SAMN04259806	LNCD00000000.1	representative genome	1864509	1864509	Rhizobium altiplani	strain=BR 10423		latest	Scaffold	Major	Full	2016-01-28	ASM154240v1	Embrapa Agrobiologia	GCA_001542405.1	identical	ftp://ftp.ncbi.nlm.nih.gov/genomes/all/GCF/001/542/405/GCF_001542405.1_ASM154240v1		assembly from type material	8099863	59.47	104	0.9905	1.0385	0.9998	1.0886	152	121201	21	30417	69	7977
GCF_001542415.1	PRJNA224116	SAMN04262301	LNCU00000000.1	na	1755647	1755647	Bradyrhizobium macuxiense	strain=BR 10303		latest	Scaffold	Major	Full	2016-01-28	ASM154241v1	Embrapa Agrobiologia	GCA_001542415.1	identical	ftp://ftp.ncbi.nlm.nih.gov/genomes/all/GCF/001/542/415/GCF_001542415.1_ASM154241v1		assembly from type material	8722143	63.19	104	0.9905	1.0288	0.9814	1.0539	137	173122	19	37731	64	8202
GCF_001548155.2	PRJNA224116	SAMD00029041		na	1079	1079	Blastochloris viridis	strain=DSM 133		latest	Complete Genome	Minor	Full	2016-02-24	BV133_assembly_1.0	Tokyo Institute of Technology	GCA_001548155.2	identical	ftp://ftp.ncbi.nlm.nih.gov/genomes/all/GCF/001/548/155/GCF_001548155.2_BV133_assembly_1.0		assembly from type material	3726627	67.93	104	0.9905	1	0.9814	1	1	3726627	1	3726627	1	3271
GCF_001558695.1	PRJNA224116	SAMN04280999	LNTU00000000.1	representative genome	1494590	1494590	Paramesorhizobium deserti	strain=A-3-E		latest	Contig	Major	Full	2016-02-11	ASM155869v1	Beijing Institute of Microbiology and Epidemiology	GCA_001558695.1	identical	ftp://ftp.ncbi.nlm.nih.gov/genomes/all/GCF/001/558/695/GCF_001558695.1_ASM155869v1		assembly from type material	5482214	60.93	104	0.9905	1.0096	0.9814	1.0123	41	693742	3	152965	10	5174
GCF_001559035.2	PRJNA224116	SAMN03996253		na	774	774	Bartonella bacilliformis	strain=FDAARGOS_174		latest	Complete Genome	Major	Full	2018-01-29	ASM155903v2	University of Maryland School of Medicine Institute for Genome Sciences (IGS) - sequencing center	GCA_001559035.2	identical	ftp://ftp.ncbi.nlm.nih.gov/genomes/all/GCF/001/559/035/GCF_001559035.2_ASM155903v2		assembly from type material	1443410	38.24	104	0.9905	1.1635	0.9814	1.0464	1	1443410	1	1443410	1	1235
GCF_001605015.1	PRJNA224116	SAMN04589126		representative genome	83263	83263	Aminobacter aminovorans	strain=KCTC 2477		latest	Complete Genome	Major	Full	2016-03-31	ASM160501v1	KCTC (Korean Collection for Type Cultures)	GCA_001605015.1	identical	ftp://ftp.ncbi.nlm.nih.gov/genomes/all/GCF/001/605/015/GCF_001605015.1_ASM160501v1		assembly from type material	6890726	63.14	104	0.9905	1.0288	0.9814	1.0277	5	5623946	1	451547	3	6666
GCF_001641335.1	PRJNA224116	SAMN04549886	LVEM00000000.1	representative genome	1803665	1803665	Bradyrhizobium stylosanthis	strain=BR 446		latest	Contig	Major	Full	2016-05-10	ASM164133v1	Embrapa Soja	GCA_001641335.1	identical	ftp://ftp.ncbi.nlm.nih.gov/genomes/all/GCF/001/641/335/GCF_001641335.1_ASM164133v1		assembly from type material	8801717	64.55	104	0.9905	1.0288	0.9814	1.0439	22	1501053	3	237570	7	8135
GCF_001641635.1	PRJNA224116	SAMN04448272	LUUB00000000.1	representative genome	1505087	1505087	Bradyrhizobium centrolobii	strain=BR 10245		latest	Scaffold	Major	Full	2016-05-10	ASM164163v1	Embrapa Agrobiologia	GCA_001641635.1	identical	ftp://ftp.ncbi.nlm.nih.gov/genomes/all/GCF/001/641/635/GCF_001641635.1_ASM164163v1		assembly from type material	10111113	63.19	104	0.9905	1.0577	0.9814	1.1206	133	140269	22	42276	75	9545
GCF_001641695.1	PRJNA224116	SAMN04457964	LSEF00000000.1	representative genome	1497615	1497615	Bradyrhizobium neotropicale	strain=BR 10247		latest	Scaffold	Major	Full	2016-05-10	ASM164169v1	Embrapa Agrobiologia	GCA_001641695.1	identical	ftp://ftp.ncbi.nlm.nih.gov/genomes/all/GCF/001/641/695/GCF_001641695.1_ASM164169v1		assembly from type material	8679329	63.57	104	0.9905	1.0288	0.9814	1.071	125	154093	19	42996	61	8152
GCF_001642675.1	PRJNA224116	SAMN03573437		representative genome	224911	1355477	Bradyrhizobium diazoefficiens USDA 110	strain=USDA 110		latest	Complete Genome	Major	Full	2016-05-12	ASM164267v1	University of Florida	GCA_001642675.1	identical	ftp://ftp.ncbi.nlm.nih.gov/genomes/all/GCF/001/642/675/GCF_001642675.1_ASM164267v1		assembly from type material	9106064	64.06	104	0.9905	1.0192	0.9814	1.0507	1	9106064	1	9106064	1	8493
GCF_001650025.1	PRJNA224116	SAMN04413744	LVVY00000000.1	representative genome	1770058	1770058	Devosia elaeis	strain=S37		latest	Contig	Major	Full	2016-05-23	De novo	University of Malaya	GCA_001650025.1	identical	ftp://ftp.ncbi.nlm.nih.gov/genomes/all/GCF/001/650/025/GCF_001650025.1_De_novo		assembly from type material	3878148	64.06	105	1	1.0095	1	1.0235	151	65520	17	21456	57	3795
GCF_001651855.1	PRJNA224116	SAMN04274562	LNQC00000000.1	na	194963	194963	Sinorhizobium americanum	strain=CFNEI 156		latest	Contig	Major	Full	2016-05-25	ASM165185v1	Ensifer americanum CFNEI 156T	GCA_001651855.1	identical	ftp://ftp.ncbi.nlm.nih.gov/genomes/all/GCF/001/651/855/GCF_001651855.1_ASM165185v1		assembly from type material	6653547	62.27	104	0.9905	1.0192	0.9998	1.0376	82	207808	12	48323	38	6201
GCF_001651865.1	PRJNA224116	SAMN04274561	LPUX00000000.1	representative genome	1472378	1472378	Ensifer glycinis	strain=CCBAU 23380		latest	Contig	Major	Full	2016-05-25	ASM165186v1	Mesorhizobium mediterraneum CCBAU 01399	GCA_001651865.1	identical	ftp://ftp.ncbi.nlm.nih.gov/genomes/all/GCF/001/651/865/GCF_001651865.1_ASM165186v1		assembly from type material	6039294	62.42	105	1	1.0286	1	1.0173	68	461421	4	93197	12	5607
GCF_001651875.1	PRJNA224116	SAMN04274563	LNQB00000000.1	representative genome	36856	36856	Sinorhizobium saheli	strain=LMG 7837		latest	Scaffold	Major	Full	2016-05-25	ASM165187v1	Ensifer saheli LMG 7837T	GCA_001651875.1	identical	ftp://ftp.ncbi.nlm.nih.gov/genomes/all/GCF/001/651/875/GCF_001651875.1_ASM165187v1		assembly from type material	5994348	63.6	104	0.9905	1.0192	0.9998	1.0386	102	115043	13	31663	49	5554
GCF_001653715.1	PRJNA224116	SAMN04631760	LWHQ00000000.1	na	427683	427683	Methylobacterium platani	strain=PMB02		latest	Scaffold	Major	Full	2016-05-31	ASM165371v1	Korea Institute of Bioscience and Biotechnology	GCA_001653715.1	identical	ftp://ftp.ncbi.nlm.nih.gov/genomes/all/GCF/001/653/715/GCF_001653715.1_ASM165371v1		assembly from type material	7023890	71.1	103	0.981	1.0291	0.9743	1.0512	150	126707	17	36738	59	6507
GCF_001687365.1	PRJNA224116	SAMN03877108	LGLV00000000.1	representative genome	1612624	1612624	Pararhizobium polonicum	strain=F5.1		latest	Contig	Major	Full	2016-07-19	ASM168736v1	Research Institute of Horticulture	GCA_001687365.1	identical	ftp://ftp.ncbi.nlm.nih.gov/genomes/all/GCF/001/687/365/GCF_001687365.1_ASM168736v1		assembly from type material	6265340	61.02	104	0.9905	1.0192	0.9814	1.0176	31	274998	7	162430	18	5858
GCF_001693385.1	PRJNA224116	SAMN05230120		representative genome	1274631	1274631	Bradyrhizobium icense	strain=LMTR 13		latest	Complete Genome	Major	Full	2016-07-25	ASM169338v1	Universidad Nacional Agraria La Molina	GCA_001693385.1	identical	ftp://ftp.ncbi.nlm.nih.gov/genomes/all/GCF/001/693/385/GCF_001693385.1_ASM169338v1		assembly from type material	8322773	62.03	104	0.9905	1.0385	0.9814	1.0865	1	8322773	1	8322773	1	7965
GCF_001693515.2	PRJNA224116	SAMN05230119		representative genome	190148	190148	Bradyrhizobium paxllaeri	strain=LMTR 21		latest	Complete Genome	Major	Full	2019-08-26	ASM169351v2	Universidad Nacional Agraria La Molina	GCA_001693515.2	identical	ftp://ftp.ncbi.nlm.nih.gov/genomes/all/GCF/001/693/515/GCF_001693515.2_ASM169351v2		assembly from type material	8377719	62.51	104	0.9905	1.0288	0.9814	1.0452	1	8377719	1	8377719	1	7901
GCF_001703635.1	PRJNA224116	SAMN04364335	LQZT00000000.1	representative genome	1480615	1480615	Hoeflea olei	strain=JC234		latest	Scaffold	Major	Full	2016-08-11	ASM170363v1	UoH	GCA_001703635.1	identical	ftp://ftp.ncbi.nlm.nih.gov/genomes/all/GCF/001/703/635/GCF_001703635.1_ASM170363v1		assembly from type material	4723612	65.54	104	0.9905	1.0096	0.9814	1.0203	50	357799	5	67560	18	4387
GCF_001708935.1	PRJNA224116	SAMN04915608	MASI00000000.1	representative genome	1177755	1177755	Methyloligella halotolerans	strain=VKM B-2706		latest	Contig	Major	Full	2016-08-19	Meth_hal_C2_1.0	G.K.Skryabin IBPM PAS	GCA_001708935.1	identical	ftp://ftp.ncbi.nlm.nih.gov/genomes/all/GCF/001/708/935/GCF_001708935.1_Meth_hal_C2_1.0		assembly from type material	3191628	63.56	103	0.981	1.0194	0.9664	1.0153	26	388255	3	108016	9	3185
GCF_001720135.1	PRJNA224116	SAMN04912030	MCRJ00000000.1	representative genome	1439726	1439726	Methylobrevis pamukkalensis	strain=PK2		latest	Contig	Major	Full	2016-09-06	MpPK2_01	G.K.Skryabin IBPM PAS	GCA_001720135.1	identical	ftp://ftp.ncbi.nlm.nih.gov/genomes/all/GCF/001/720/135/GCF_001720135.1_MpPK2_01		assembly from type material	4380693	68.9	101	0.9619	1.0594	0.9718	1.0311	348	28482	50	7346	155	4702
GCF_001723275.1	PRJNA224116	SAMN05006708	LYBW00000000.1	na	1752398	1752398	Ensifer alkalisoli	strain=YIC4027		latest	Scaffold	Major	Full	2016-09-12	ASM172327v1	Yantai Institute of Coastal Zone Research.Chinese Academy of Sciences	GCA_001723275.1	identical	ftp://ftp.ncbi.nlm.nih.gov/genomes/all/GCF/001/723/275/GCF_001723275.1_ASM172327v1		assembly from type material	5973319	62.23	104	0.9905	1.0192	0.9814	1.0383	66	283564	6	57784	25	5561
GCF_001723285.1	PRJNA224116	SAMN04328993	LPWG00000000.1	representative genome	1774968	1774968	Methyloceanibacter methanicus	strain=R-67174		latest	Contig	Major	Full	2016-09-12	ASM172328v1	Ghent University	GCA_001723285.1	identical	ftp://ftp.ncbi.nlm.nih.gov/genomes/all/GCF/001/723/285/GCF_001723285.1_ASM172328v1		assembly from type material	3139022	63.98	100	0.9524	1.01	0.9107	1.0241	14	384508	4	154136	9	3219
GCF_001723295.1	PRJNA224116	SAMN04328996	LPWD00000000.1	representative genome	1774971	1774971	Methyloceanibacter marginalis	strain=R-67177		latest	Contig	Major	Full	2016-09-12	ASM172329v1	Ghent University	GCA_001723295.1	identical	ftp://ftp.ncbi.nlm.nih.gov/genomes/all/GCF/001/723/295/GCF_001723295.1_ASM172329v1		assembly from type material	2997425	63.48	95	0.9048	1.0316	0.8782	1.0293	470	9322	96	3151	318	3784
GCF_001723305.1	PRJNA224116	SAMN04328994	LPWF00000000.1	representative genome	1774969	1774969	Methyloceanibacter superfactus	strain=R-67175		latest	Contig	Major	Full	2016-09-12	ASM172330v1	Ghent University	GCA_001723305.1	identical	ftp://ftp.ncbi.nlm.nih.gov/genomes/all/GCF/001/723/305/GCF_001723305.1_ASM172330v1		assembly from type material	3100099	64.53	98	0.9333	1.0102	0.8961	1.0245	38	144349	8	42543	22	3368
GCF_001723355.1	PRJNA224116	SAMN04328995	LPWE00000000.1	representative genome	1774970	1774970	Methyloceanibacter stevinii	strain=R-67176		latest	Contig	Major	Full	2016-09-12	ASM172335v1	Ghent University	GCA_001723355.1	identical	ftp://ftp.ncbi.nlm.nih.gov/genomes/all/GCF/001/723/355/GCF_001723355.1_ASM172335v1		assembly from type material	3216104	63.07	101	0.9619	1	0.9557	1	14	530069	3	155117	8	3335
GCF_001741865.1	PRJNA224116	SAMN05730837		representative genome	1526658	1526658	Bosea vaviloviae	strain=Vaf18		latest	Complete Genome	Major	Full	2016-09-21	ASM174186v1	All-Russia Research Institute for Agricultural Microbiology	GCA_001741865.1	identical	ftp://ftp.ncbi.nlm.nih.gov/genomes/all/GCF/001/741/865/GCF_001741865.1_ASM174186v1		assembly from type material	6713548	65.41	103	0.981	1.0097	0.9813	1.026	2	6373793	1	6373793	1	6231
GCF_001885585.1	PRJNA224116	SAMN04486996	LSRP00000000.1	representative genome	1798805	1798805	Pararhizobium antarcticum	strain=NAQVI 59		latest	Contig	Major	Full	2016-11-23	ASM188558v1	University of Copenhagen	GCA_001885585.1	identical	ftp://ftp.ncbi.nlm.nih.gov/genomes/all/GCF/001/885/585/GCF_001885585.1_ASM188558v1		assembly from type material	5457546	60.67	105	1	1.0286	1	1.0121	161	108393	16	20958	61	5225
GCF_001889605.1	PRJNA224116	SAMN06054042		representative genome	1670800	1670800	Mesorhizobium oceanicum	strain=B7		latest	Complete Genome	Major	Full	2016-12-06	ASM188960v1	Zhejiang University	GCA_001889605.1	identical	ftp://ftp.ncbi.nlm.nih.gov/genomes/all/GCF/001/889/605/GCF_001889605.1_ASM188960v1		assembly from type material	5324561	65.06	103	0.981	1.0097	0.9813	1.0224	2	5158483	1	5158483	1	5189
GCF_001927285.1	PRJNA224116	SAMN06172149	MSIG00000000.1	representative genome	1709001	1709001	Mongoliimonas terrestris	strain=MIMtkB18		latest	Contig	Major	Full	2016-12-31	ASM192728v1	Inner Mongolia Agricultural University	GCA_001927285.1	identical	ftp://ftp.ncbi.nlm.nih.gov/genomes/all/GCF/001/927/285/GCF_001927285.1_ASM192728v1		assembly from type material	5098595	69.57	104	0.9905	1.0288	0.9814	1.0679	94	350373	6	47780	21	4503
GCF_001931685.1	PRJNA224116	SAMN05958284	MOOY00000000.1	representative genome	1856850	1856850	Rhizobium arenae	strain=MIM27		latest	Contig	Major	Full	2017-01-04	ASM193168v1	Applied and Environmental Microbiology	GCA_001931685.1	identical	ftp://ftp.ncbi.nlm.nih.gov/genomes/all/GCF/001/931/685/GCF_001931685.1_ASM193168v1		assembly from type material	4939617	59.82	104	0.9905	1.0288	0.9814	1.061	43	491638	5	134628	11	4719
GCF_001936175.1	PRJNA224116	SAMN04433067		representative genome	418223	418223	Methylobacterium phyllosphaerae	strain=CBMB27		latest	Complete Genome	Major	Full	2017-01-05	ASM193617v1	Chungbuk National University	GCA_001936175.1	identical	ftp://ftp.ncbi.nlm.nih.gov/genomes/all/GCF/001/936/175/GCF_001936175.1_ASM193617v1		assembly from type material	6316624	69.57	104	0.9905	1.0288	0.9745	1.0588	4	6083998	1	6083998	1	5797
GCF_001938945.1	PRJNA224116	SAMN05832038	MKIO00000000.1	representative genome	1672749	1672749	Rhizobium rhizosphaerae	strain=MH17		latest	Scaffold	Major	Full	2017-01-06	ASM193894v1	Chinese Academy of Agricultural Sciences	GCA_001938945.1	identical	ftp://ftp.ncbi.nlm.nih.gov/genomes/all/GCF/001/938/945/GCF_001938945.1_ASM193894v1		assembly from type material	5537226	64.49	104	0.9905	1.0385	0.9814	1.0622	48	237867	8	104302	21	4867
GCF_001938985.1	PRJNA224116	SAMN05832037	MKIN00000000.1	representative genome	887144	887144	Rhizobium taibaishanense	strain=14971		latest	Scaffold	Major	Full	2017-01-06	ASM193898v1	Chinese Academy of Agricultural Sciences	GCA_001938985.1	identical	ftp://ftp.ncbi.nlm.nih.gov/genomes/all/GCF/001/938/985/GCF_001938985.1_ASM193898v1		assembly from type material	5418020	59.27	102	0.9714	1.0196	0.9627	1.0508	28	465074	4	145902	10	4879
GCF_001939045.1	PRJNA224116	SAMN05829247	MKIM00000000.1	representative genome	1867956	1867956	Rhizobium oryziradicis	strain=N19		latest	Scaffold	Major	Full	2017-01-06	ASM193904v1	Chinese Academy of Agricultural Sciences	GCA_001939045.1	identical	ftp://ftp.ncbi.nlm.nih.gov/genomes/all/GCF/001/939/045/GCF_001939045.1_ASM193904v1		assembly from type material	5156254	55.13	103	0.981	1.0097	0.9722	1.0125	33	473739	4	103885	12	4714
GCF_001952075.1	PRJNA224116	SAMN04505058	LXYU00000000.1	na	1686310	1686310	Bartonella apis	strain=PEB0122		latest	Contig	Major	Full	2017-01-13	ASM195207v1	University of Lausanne	GCA_001952075.1	identical	ftp://ftp.ncbi.nlm.nih.gov/genomes/all/GCF/001/952/075/GCF_001952075.1_ASM195207v1		assembly from type material	2603122	45.45	104	0.9905	1	0.9814	1	16	566086	2	500662	4	2194
GCF_001953055.1	PRJNA224116	SAMN06199440		representative genome	2712698	2712698	Salaquimonas pukyongi	strain=RR3-28		latest	Complete Genome	Major	Full	2017-01-17	ASM195305v1	Pukyong National University	GCA_001953055.1	identical	ftp://ftp.ncbi.nlm.nih.gov/genomes/all/GCF/001/953/055/GCF_001953055.1_ASM195305v1		assembly from type material	3357577	58.59	104	0.9905	1.0481	0.9814	1.0835	1	3357577	1	3357577	1	3260
GCF_001982635.1	PRJNA224116	SAMN05826124	MKFI00000000.1	representative genome	1904807	1904807	Bradyrhizobium mercantei	strain=SEMIA 6399		latest	Contig	Major	Full	2017-02-01	ASM198263v1	Embrapa	GCA_001982635.1	identical	ftp://ftp.ncbi.nlm.nih.gov/genomes/all/GCF/001/982/635/GCF_001982635.1_ASM198263v1		assembly from type material	8842857	63.99	104	0.9905	1.0865	0.9814	1.0787	72	1006110	4	259995	10	8140
GCF_002000045.1	PRJNA224116	SAMN06309512	MUXO00000000.1	na	1335061	1335061	Rhizobium flavum	strain=YW14		latest	Scaffold	Major	Full	2017-02-15	ASM200004v1	DSMZ	GCA_002000045.1	identical	ftp://ftp.ncbi.nlm.nih.gov/genomes/all/GCF/002/000/045/GCF_002000045.1_ASM200004v1		assembly from type material	4659099	61.54	105	1	1.019	1	1.0167	52	488073	4	61484	12	4562
GCF_002008165.1	PRJNA224116	SAMN06094799	MRDM00000000.1	representative genome	1076926	1076926	Rhizobium laguerreae	strain=FB206		latest	Contig	Major	Full	2017-02-28	ASM200816v1	Northeast institute of Geography and Agroecology. Chinese Academy of Sciences	GCA_002008165.1	identical	ftp://ftp.ncbi.nlm.nih.gov/genomes/all/GCF/002/008/165/GCF_002008165.1_ASM200816v1		assembly from type material	7323210	60.78	103	0.981	1.0194	0.9813	1.0383	33	515701	5	267849	12	7113
GCF_002008215.1	PRJNA224116	SAMN06074341	MRDG00000000.1	na	358	358	Agrobacterium tumefaciens	strain=LMG 140		latest	Contig	Major	Full	2017-02-28	ASM200821v1	Northeast institute of Geography and Agroecology. Chinese Academy of Sciences	GCA_002008215.1	identical	ftp://ftp.ncbi.nlm.nih.gov/genomes/all/GCF/002/008/215/GCF_002008215.1_ASM200821v1		assembly from synonym type material	5491420	59.34	105	1	1	1	1	22	480635	4	154829	11	5226
GCF_002008225.1	PRJNA224116	SAMN06091695	MRDH00000000.1	na	1183413	1183413	Agrobacterium salinitolerans	strain=YIC 5082		latest	Scaffold	Major	Full	2017-02-28	ASM200822v1	Northeast institute of Geography and Agroecology. Chinese Academy of Sciences	GCA_002008225.1	identical	ftp://ftp.ncbi.nlm.nih.gov/genomes/all/GCF/002/008/225/GCF_002008225.1_ASM200822v1		assembly from type material	4990461	59.31	104	0.9905	1.0096	0.9918	1.0257	40	259577	6	71219	19	4634
GCF_002008275.1	PRJNA224116	SAMN06074345	MRDJ00000000.1	na	648995	648995	Rhizobium pusense	strain=NRCPB10		latest	Scaffold	Major	Full	2017-02-28	ASM200827v1	Northeast institute of Geography and Agroecology. Chinese Academy of Sciences	GCA_002008275.1	identical	ftp://ftp.ncbi.nlm.nih.gov/genomes/all/GCF/002/008/275/GCF_002008275.1_ASM200827v1		assembly from type material	5271321	59.24	104	0.9905	1.0192	0.9918	1.0236	29	286695	5	120369	15	5058
GCF_002008365.1	PRJNA224116	SAMN06094796	MRDL00000000.1	na	754774	384	Rhizobium leguminosarum bv. viciae USDA 2370	strain=USDA 2370		latest	Contig	Major	Full	2017-02-28	ASM200836v1	Northeast institute of Geography and Agroecology. Chinese Academy of Sciences	GCA_002008365.1	identical	ftp://ftp.ncbi.nlm.nih.gov/genomes/all/GCF/002/008/365/GCF_002008365.1_ASM200836v1		assembly from type material	7811012	60.58	103	0.981	1.0194	0.9813	1.0257	72	432378	6	72450	21	7445
GCF_002022685.1	PRJNA224116	SAMN06213864		representative genome	687861	165694	Bartonella schoenbuchensis R1	strain=R1		latest	Chromosome	Major	Full	2017-03-07	ASM202268v1	University of Basel	GCA_002022685.1	identical	ftp://ftp.ncbi.nlm.nih.gov/genomes/all/GCF/002/022/685/GCF_002022685.1_ASM202268v1		assembly from type material	1728487	37.84	104	0.9905	1.0192	0.9814	1.007	2	1672726	1	1672726	1	1641
GCF_002043005.1	PRJNA224116	SAMN02441730		representative genome	1122214	293089	Martelella mediterranea DSM 17316	strain=MACL11		latest	Complete Genome	Major	Full	2017-03-20	ASM204300v1	Leibniz Institute DSMZ	GCA_002043005.1	identical	ftp://ftp.ncbi.nlm.nih.gov/genomes/all/GCF/002/043/005/GCF_002043005.1_ASM204300v1		assembly from type material	5693067	62.41	103	0.981	1.0194	0.9732	1.0296	4	4671477	1	593079	2	5201
GCF_002068095.1	PRJNA224116	SAMN04849207	LWIG00000000.1	na	1399419	1399419	Bradyrhizobium sacchari	strain=p9-20		latest	Scaffold	Major	Full	2017-03-22	ASM206809v1	Embrapa Agrobiologia	GCA_002068095.1	identical	ftp://ftp.ncbi.nlm.nih.gov/genomes/all/GCF/002/068/095/GCF_002068095.1_ASM206809v1		assembly from type material	8698798	63.74	104	0.9905	1.0288	0.9814	1.0425	69	314112	8	88312	29	8158
GCF_002075885.1	PRJNA224116	SAMN05526244	MDET00000000.1	representative genome	1873176	1873176	Pseudaminobacter manganicus	strain=JH-7		latest	Contig	Major	Full	2017-03-31	ASM207588v1	Huazhong Agricultural University	GCA_002075885.1	identical	ftp://ftp.ncbi.nlm.nih.gov/genomes/all/GCF/002/075/885/GCF_002075885.1_ASM207588v1		assembly from type material	4842937	61.19	104	0.9905	1.0385	0.9814	1.0554	60	152861	11	40013	31	4722
GCF_002119765.1	PRJNA224116	SAMN06886414		representative genome	1235591	1235591	Pseudorhodoplanes sinuspersici	strain=RIPI110		latest	Complete Genome	Major	Full	2017-05-09	ASM211976v1	Research institute of petroleum industry	GCA_002119765.1	identical	ftp://ftp.ncbi.nlm.nih.gov/genomes/all/GCF/002/119/765/GCF_002119765.1_ASM211976v1		assembly from type material	5971615	60.32	104	0.9905	1.0288	0.9814	1.0669	1	5971615	1	5971615	1	5795
GCF_002204185.1	PRJNA224116	SAMN06555453	MXPU00000000.1	na	1967781	1967781	Rhizobium esperanzae	strain=CNPSo 668		latest	Contig	Major	Full	2017-06-21	ASM220418v1	Embrapa	GCA_002204185.1	identical	ftp://ftp.ncbi.nlm.nih.gov/genomes/all/GCF/002/204/185/GCF_002204185.1_ASM220418v1		assembly from type material	6294057	61.06	104	0.9905	1.0288	0.9814	1.0383	77	239649	9	76954	25	6085
GCF_002238045.1	PRJNA224116	SAMN06678465	NBYO00000000.1	representative genome	1876515	1876515	Notoacmeibacter marinus	strain=XMTR2A4		latest	Contig	Major	Full	2017-08-01	ASM223804v1	Zhaobin Huang	GCA_002238045.1	identical	ftp://ftp.ncbi.nlm.nih.gov/genomes/all/GCF/002/238/045/GCF_002238045.1_ASM223804v1		assembly from type material	3292184	61.52	104	0.9905	1	0.9814	1	3	1694787	1	710765	3	3125
GCF_002252445.1	PRJNA224116	SAMN07258021	NNRJ00000000.1	representative genome	571255	571255	Ochrobactrum thiophenivorans	strain=DSM 7216		latest	Contig	Major	Full	2017-08-15	ASM225244v1	Intercollegiate Faculty of Biotechnology UG&MUG	GCA_002252445.1	identical	ftp://ftp.ncbi.nlm.nih.gov/genomes/all/GCF/002/252/445/GCF_002252445.1_ASM225244v1		assembly from type material	4364783	51.64	104	0.9905	1.0192	0.9814	1.0176	77	168659	5	34587	26	4151
GCF_002252475.1	PRJNA224116	SAMN07258022	NNRK00000000.1	representative genome	571254	571254	Ochrobactrum rhizosphaerae	strain=PR17		latest	Contig	Major	Full	2017-08-15	ASM225247v1	Intercollegiate Faculty of Biotechnology UG&MUG	GCA_002252475.1	identical	ftp://ftp.ncbi.nlm.nih.gov/genomes/all/GCF/002/252/475/GCF_002252475.1_ASM225247v1		assembly from type material	4904011	53.01	104	0.9905	1.0385	0.9814	1.0415	36	440158	4	88472	14	4638
GCF_002252505.1	PRJNA224116	SAMN07258023	NNRL00000000.1	representative genome	94627	94627	Ochrobactrum grignonense	strain=OgA9a		latest	Contig	Major	Full	2017-08-15	ASM225250v1	Intercollegiate Faculty of Biotechnology UG&MUG	GCA_002252505.1	identical	ftp://ftp.ncbi.nlm.nih.gov/genomes/all/GCF/002/252/505/GCF_002252505.1_ASM225250v1		assembly from type material	4838271	54.14	104	0.9905	1.0288	0.9814	1.0294	169	259681	6	90072	16	4688
GCF_002252525.1	PRJNA224116	SAMN07258024	NNRM00000000.1	na	419475	419475	Ochrobactrum pseudogrignonense	strain=CCUG 30717		latest	Contig	Major	Full	2017-08-15	ASM225252v1	Intercollegiate Faculty of Biotechnology UG&MUG	GCA_002252525.1	identical	ftp://ftp.ncbi.nlm.nih.gov/genomes/all/GCF/002/252/525/GCF_002252525.1_ASM225252v1		assembly from type material	5531562	53.99	105	1	1.019	1	1.0356	53	250510	8	87546	23	5329
GCF_002252535.1	PRJNA224116	SAMN07259926	NNRN00000000.1	representative genome	255457	255457	Ochrobactrum lupini	strain=LUP21		latest	Contig	Major	Full	2017-08-15	ASM225253v1	Intercollegiate Faculty of Biotechnology UG&MUG	GCA_002252535.1	identical	ftp://ftp.ncbi.nlm.nih.gov/genomes/all/GCF/002/252/535/GCF_002252535.1_ASM225253v1		assembly from type material	5582813	56.34	104	0.9905	1.0192	0.9814	1.0294	65	209686	8	62102	27	5384
GCF_002266435.2	PRJNA224116	SAMN07448754		representative genome	1404768	1404768	Bradyrhizobium amphicarpaeae	strain=39S1MB		latest	Complete Genome	Major	Full	2018-05-22	ASM226643v2	Ottawa Research and Development Center	GCA_002266435.2	identical	ftp://ftp.ncbi.nlm.nih.gov/genomes/all/GCF/002/266/435/GCF_002266435.2_ASM226643v2		assembly from type material	7044517	64.66	103	0.981	1.0097	0.9813	1.0227	1	7044517	1	7044517	1	6536
GCF_002266465.2	PRJNA224116	SAMN07448748		representative genome	1404367	1404367	Bradyrhizobium symbiodeficiens	strain=85S1MB		latest	Complete Genome	Major	Full	2018-05-22	ASM226646v2	Ottawa Research and Development Center	GCA_002266465.2	identical	ftp://ftp.ncbi.nlm.nih.gov/genomes/all/GCF/002/266/465/GCF_002266465.2_ASM226646v2		assembly from type material	7039503	64.27	103	0.981	1.0097	0.9813	1.0227	1	7039503	1	7039503	1	6586
GCF_002270415.1	PRJNA224116	SAMN07357070	NNRI00000000.1	representative genome	1300294	1300294	Mesorhizobium sophorae	strain=ICMP 19535		latest	Contig	Major	Full	2017-08-25	ASM227041v1	Murdoch University	GCA_002270415.1	identical	ftp://ftp.ncbi.nlm.nih.gov/genomes/all/GCF/002/270/415/GCF_002270415.1_ASM227041v1		assembly from type material	8049106	62.22	104	0.9905	1.0385	0.9814	1.0607	24	666711	4	126304	13	7667
GCF_002278035.1	PRJNA224116	SAMN07259827		representative genome	271865	271865	Ochrobactrum quorumnocens	strain=A44		latest	Complete Genome	Major	Full	2017-08-30	ASM227803v1	Intercollegiate Faculty of Biotechnology UG&MUG	GCA_002278035.1	identical	ftp://ftp.ncbi.nlm.nih.gov/genomes/all/GCF/002/278/035/GCF_002278035.1_ASM227803v1		assembly from type material	5645291	53.16	104	0.9905	1.0288	0.9814	1.0583	4	2008185	2	1032012	3	5363
GCF_002278135.2	PRJNA224116	SAMN07448707		representative genome	931866	931866	Bradyrhizobium ottawaense	strain=OO99		latest	Complete Genome	Major	Full	2018-05-22	ASM227813v2	Ottawa Research and Development Center	GCA_002278135.2	identical	ftp://ftp.ncbi.nlm.nih.gov/genomes/all/GCF/002/278/135/GCF_002278135.2_ASM227813v2		assembly from type material	8606328	63.83	103	0.981	1.0291	0.9813	1.0489	1	8606328	1	8606328	1	8012
GCF_002284535.1	PRJNA224116	SAMN07259541	NPKH00000000.1	representative genome	2014805	2014805	Mesorhizobium wenxiniae	strain=WYCCWR 10195		latest	Scaffold	Major	Full	2017-08-31	ASM228453v1	Zhengzhou University of Light Industry	GCA_002284535.1	identical	ftp://ftp.ncbi.nlm.nih.gov/genomes/all/GCF/002/284/535/GCF_002284535.1_ASM228453v1		assembly from type material	6681850	61.88	104	0.9905	1.0481	0.9814	1.0607	43	386068	6	155064	16	6562
GCF_002284575.1	PRJNA224116	SAMN07259767	NPKJ00000000.1	representative genome	241416	241416	Mesorhizobium temperatum	strain=SDW018		latest	Contig	Major	Full	2017-08-31	ASM228457v1	Zhengzhou University of Light Industry	GCA_002284575.1	identical	ftp://ftp.ncbi.nlm.nih.gov/genomes/all/GCF/002/284/575/GCF_002284575.1_ASM228457v1		assembly from type material	7165358	61.9	104	0.9905	1.0288	0.9814	1.0607	77	254929	10	51941	40	6985
GCF_002288525.1	PRJNA224116	SAMN07445560		representative genome	716928	716925	Ensifer sojae CCBAU 05684	strain=CCBAU 05684		latest	Complete Genome	Major	Full	2017-09-08	ASM228852v1	China Agricultural University	GCA_002288525.1	identical	ftp://ftp.ncbi.nlm.nih.gov/genomes/all/GCF/002/288/525/GCF_002288525.1_ASM228852v1		assembly from type material	6094027	62.03	104	0.9905	1.0096	0.9918	1.0122	3	3672259	1	2011513	2	5697
GCF_002355335.1	PRJNA224116	SAMD00039968		representative genome	1333996	1333996	Variibacter gotjawalensis	strain=GJW-30		latest	Complete Genome	Major	Full	2015-11-20	ASM235533v1	Korea Research Institute of Bioscience and Biotechnology (KRIBB)	GCA_002355335.1	identical	ftp://ftp.ncbi.nlm.nih.gov/genomes/all/GCF/002/355/335/GCF_002355335.1_ASM235533v1		assembly from type material	4586237	62.23	104	0.9905	1.0192	0.9814	1.0216	1	4586237	1	4586237	1	4441
GCF_002529485.1	PRJNA224116	SAMN07646571	NWQG00000000.1	representative genome	2037900	2037900	Mesorhizobium sanjuanii	strain=BSA136		latest	Contig	Major	Full	2017-10-11	ASM252948v1	Instituto de Biotecnologia y Biologia Molecular	GCA_002529485.1	identical	ftp://ftp.ncbi.nlm.nih.gov/genomes/all/GCF/002/529/485/GCF_002529485.1_ASM252948v1		assembly from type material	6399702	62.49	104	0.9905	1.0385	0.9814	1.0383	343	35232	55	10652	183	6240
GCF_002531855.1	PRJNA224116	SAMN07627168	NWSY00000000.1	na	1538159	1538159	Rhizobium hidalgonense	strain=FH14		latest	Contig	Major	Full	2017-10-12	ASM253185v1	Northwest A&F University	GCA_002531855.1	identical	ftp://ftp.ncbi.nlm.nih.gov/genomes/all/GCF/002/531/855/GCF_002531855.1_ASM253185v1		assembly from type material	7268818	60.83	103	0.981	1	0.9813	1	139	181699	13	34761	41	7039
GCF_002727065.1	PRJNA224116	SAMN07809790	PDVP00000000.1	representative genome	1982044	1982044	Zhengella mangrovi	strain=X9-2-2		latest	Contig	Major	Full	2017-10-26	ASM272706v1	Xiamen University	GCA_002727065.1	identical	ftp://ftp.ncbi.nlm.nih.gov/genomes/all/GCF/002/727/065/GCF_002727065.1_ASM272706v1		assembly from type material	5066330	65.02	104	0.9905	1.0288	0.9814	1.0337	76	225635	6	86089	20	4796
GCF_002741015.1	PRJNA224116	SAMN05413551		representative genome	1882682	1882682	Microvirga ossetica	strain=V5/3m		latest	Complete Genome	Major	Full	2016-08-05	ASM274101v1	ARRIAM	GCA_002741015.1	identical	ftp://ftp.ncbi.nlm.nih.gov/genomes/all/GCF/002/741/015/GCF_002741015.1_ASM274101v1		assembly from type material	9631051	62.67	105	1	1.0286	1	1.0218	6	5843140	1	712299	4	9601
GCF_002750855.1	PRJNA224116	SAMN07653193	NWUC00000000.1	representative genome	2037914	2037914	Pararhizobium haloflavum	strain=XC0140		latest	Contig	Major	Full	2017-11-05	ASM275085v1	Zhejiang University	GCA_002750855.1	identical	ftp://ftp.ncbi.nlm.nih.gov/genomes/all/GCF/002/750/855/GCF_002750855.1_ASM275085v1		assembly from type material	4176578	62.38	104	0.9905	1.0481	0.9814	1.0383	36	365947	4	115651	10	4129
GCF_002752655.1	PRJNA224116	SAMN07735646		representative genome	595536	426	Methylosinus trichosporium OB3b	strain=OB3b		latest	Complete Genome	Major	Full	2017-11-06	ASM275265v1	University of Waterloo	GCA_002752655.1	identical	ftp://ftp.ncbi.nlm.nih.gov/genomes/all/GCF/002/752/655/GCF_002752655.1_ASM275265v1		assembly from type material	5183433	65.79	103	0.981	1.0097	0.9743	1.0241	4	4508832	1	285280	2	4709
GCF_002759055.1	PRJNA224116	SAMN07836923	PELK00000000.1	na	2038277	2038277	Methylobacterium frigidaeris	strain=IER25-16		latest	Scaffold	Major	Full	2017-11-07	ASM275905v1	Chung-Ang University	GCA_002759055.1	identical	ftp://ftp.ncbi.nlm.nih.gov/genomes/all/GCF/002/759/055/GCF_002759055.1_ASM275905v1		assembly from type material	6395331	70.42	96	0.9143	1.0417	0.893	1.0415	1670	5448	346	1698	1189	7210
GCF_002764115.1	PRJNA224116	SAMN05946057		representative genome	1867719	1867719	Phyllobacterium zundukense	strain=Tri-48; RCAM 03910		latest	Complete Genome	Major	Full	2017-11-13	ASM276411v1	ARRIAM	GCA_002764115.1	identical	ftp://ftp.ncbi.nlm.nih.gov/genomes/all/GCF/002/764/115/GCF_002764115.1_ASM276411v1		assembly from type material	6208009	57.22	104	0.9905	1.0192	0.9814	1.026	6	3950702	1	533425	4	6222
GCF_002770725.1	PRJNA224116	SAMN07510660	NQVN00000000.1	representative genome	2023338	2023338	Pleomorphomonas carboxyditropha	strain=SVCO-16		latest	Contig	Major	Full	2017-11-14	ASM277072v1	Arizona State University	GCA_002770725.1	identical	ftp://ftp.ncbi.nlm.nih.gov/genomes/all/GCF/002/770/725/GCF_002770725.1_ASM277072v1		assembly from type material	5888031	66.36	104	0.9905	1.0288	0.9814	1.0471	80	192889	8	48044	29	5394
GCF_002795245.1	PRJNA224116	SAMN08035463	PGVG00000000.1	representative genome	1419263	1419263	Bradyrhizobium forestalis	strain=INPA54B		latest	Scaffold	Major	Full	2017-11-22	ASM279524v1	Universidade Federal de Lavras	GCA_002795245.1	identical	ftp://ftp.ncbi.nlm.nih.gov/genomes/all/GCF/002/795/245/GCF_002795245.1_ASM279524v1		assembly from type material	8252029	63.85	104	0.9905	1.0288	0.9814	1.0302	183	169127	15	36031	54	7601
GCF_002844595.1	PRJNA224116	SAMN08166494	PJNW00000000.1	na	1166257	1166257	Pleomorphomonas diazotrophica	strain=R5-392		latest	Contig	Major	Full	2017-12-18	ASM284459v1	Arizona State University	GCA_002844595.1	identical	ftp://ftp.ncbi.nlm.nih.gov/genomes/all/GCF/002/844/595/GCF_002844595.1_ASM284459v1		assembly from type material	4526482	65.07	104	0.9905	1	0.9814	1	40	310367	4	104502	15	4228
GCF_002866925.1	PRJNA224116	SAMN08281243	PKUQ00000000.1	representative genome	2067669	2067669	Cohaesibacter celericrescens	strain=H1304		latest	Contig	Major	Full	2018-01-08	ASM286692v1	Shandong University	GCA_002866925.1	identical	ftp://ftp.ncbi.nlm.nih.gov/genomes/all/GCF/002/866/925/GCF_002866925.1_ASM286692v1		assembly from type material	5015406	50.79	95	0.9048	1.0632	0.9684	1.1036	59	425421	5	47327	21	4564
GCF_002879535.1	PRJNA224116	SAMN08321006	PNOT00000000.2	representative genome	537601	537601	Mesorhizobium intechi	strain=BD68		latest	Contig	Major	Full	2019-07-25	ASM287953v2	Instituto de Biotecnologia y Biologia Molecular	GCA_002879535.2	identical	ftp://ftp.ncbi.nlm.nih.gov/genomes/all/GCF/002/879/535/GCF_002879535.1_ASM287953v2		assembly from type material	6581278	63.1	103	0.981	1.0291	0.9592	1.0621	393	28806	65	7307	237	6472
GCF_002893625.1	PRJNA224116	SAMN08238713	PKMZ00000000.1	representative genome	2066697	2066697	Mangrovicella endophytica	strain=5T4P-12-1		latest	Contig	Major	Full	2018-01-19	ASM289362v1	BGI-Shenzhen	GCA_002893625.1	identical	ftp://ftp.ncbi.nlm.nih.gov/genomes/all/GCF/002/893/625/GCF_002893625.1_ASM289362v1		assembly from type material	4432295	66.54	104	0.9905	1.0192	0.9814	1.035	35	569830	3	105633	12	4087
GCF_002896715.1	PRJNA224116	SAMN07981493	PGEL00000000.1	na	2052828	2052828	Agrobacterium bohemicum	strain=R90		latest	Contig	Major	Full	2018-01-22	ASM289671v1	Institute of Biotechnology CAS	GCA_002896715.1	identical	ftp://ftp.ncbi.nlm.nih.gov/genomes/all/GCF/002/896/715/GCF_002896715.1_ASM289671v1		assembly from type material	4713153	56.23	102	0.9714	1	0.972	1	30	344460	5	135583	13	4505
GCF_002914525.1	PRJNA224116	SAMN04302100	LODW00000000.1	representative genome	1538159	1538159	Rhizobium hidalgonense	strain=FH14		latest	Contig	Major	Full	2018-02-02	ASM291452v1	Instituo Politecnico Nacional	GCA_002914525.1	identical	ftp://ftp.ncbi.nlm.nih.gov/genomes/all/GCF/002/914/525/GCF_002914525.1_ASM291452v1		assembly from type material	7268818	60.83	103	0.981	1	0.9813	1	139	181699	13	34761	41	7039
GCF_002915175.1	PRJNA224116	SAMN07689694	NXEJ00000000.1	representative genome	1972867	1972867	Agrobacterium rosae	strain=NCPPB 1650		latest	Scaffold	Major	Full	2018-02-02	ASM291517v1	Julius Kuehn-Institut. Federal Research Centre for Cultivated Plants (JKI). EP	GCA_002915175.1	identical	ftp://ftp.ncbi.nlm.nih.gov/genomes/all/GCF/002/915/175/GCF_002915175.1_ASM291517v1		assembly from type material	5464393	56.53	103	0.981	1.0291	0.9813	1.0556	23	504403	5	235142	11	5213
GCF_002930635.1	PRJNA224116	SAMN08464135	PSNV00000000.1	representative genome	2083279	2083279	Kaistia algarum	strain=LYH11		latest	Contig	Major	Full	2018-02-17	ASM293063v1	Chung-Ang University	GCA_002930635.1	identical	ftp://ftp.ncbi.nlm.nih.gov/genomes/all/GCF/002/930/635/GCF_002930635.1_ASM293063v1		assembly from type material	6214553	61.03	104	0.9905	1.2019	0.9814	1.1927	598	270095	6	2158	159	5939
GCF_002937075.1	PRJNA224116	SAMN07156352	NHSJ00000000.1	representative genome	333368	333368	Rhodoblastus sphagnicola	strain=DSM 16996		latest	Scaffold	Major	Full	2018-02-21	ASM293707v1	GEOMAR Helmholtz Centre for Ocean Research Kiel	GCA_002937075.1	identical	ftp://ftp.ncbi.nlm.nih.gov/genomes/all/GCF/002/937/075/GCF_002937075.1_ASM293707v1		assembly from type material	5092596	63.92	104	0.9905	1	0.9814	1	141	67061	24	16167	82	4817
GCF_002937135.1	PRJNA224116	SAMN07534998	NRRJ00000000.1	na	1074	1074	Rhodoblastus acidophilus	strain=DSM 137		latest	Contig	Major	Full	2018-02-21	ASM293713v1	GEOMAR Helmholtz Centre for Ocean Research Kiel	GCA_002937135.1	identical	ftp://ftp.ncbi.nlm.nih.gov/genomes/all/GCF/002/937/135/GCF_002937135.1_ASM293713v1		assembly from type material	4736832	65.19	104	0.9905	1	0.9814	1	93	120665	10	29646	37	4477
GCF_002968575.1	PRJNA224116	SAMN08554966	PVBM00000000.1	representative genome	67774	67774	Neorhizobium huautlense	strain=DSM 21817		latest	Contig	Major	Full	2018-03-05	ASM296857v1	Centre for Plant Biotechnology and Genomics UPM-INIA	GCA_002968575.1	identical	ftp://ftp.ncbi.nlm.nih.gov/genomes/all/GCF/002/968/575/GCF_002968575.1_ASM296857v1		assembly from type material	5725939	60.04	105	1	1.0095	1	1.0255	146	186797	10	42882	34	5551
GCF_002968635.1	PRJNA224116	SAMN08554967	PVBN00000000.1	representative genome	528178	528178	Neorhizobium alkalisoli	strain=DSM 21826		latest	Contig	Major	Full	2018-03-05	ASM296863v1	Centre for Plant Biotechnology and Genomics UPM-INIA	GCA_002968635.1	identical	ftp://ftp.ncbi.nlm.nih.gov/genomes/all/GCF/002/968/635/GCF_002968635.1_ASM296863v1		assembly from type material	5869725	60.31	105	1	1.019	1	1.0392	68	390987	6	157354	15	5681
GCF_002980495.1	PRJNA224116	SAMN08612570	PVBR00000000.1	representative genome	2670329	2670329	Phyllobacterium phragmitis	strain=1N-3		latest	Contig	Major	Full	2018-03-07	ASM298049v1	Chinese Academy of Forestry	GCA_002980495.1	identical	ftp://ftp.ncbi.nlm.nih.gov/genomes/all/GCF/002/980/495/GCF_002980495.1_ASM298049v1		assembly from type material	5625008	60.1	104	0.9905	1.0192	0.9814	1.0362	139	200258	9	55453	29	5428
GCF_002980555.1	PRJNA224116	SAMN08612627	PVBT00000000.1	na	28101	28101	Phyllobacterium myrsinacearum	strain=DSM 5892		latest	Contig	Major	Full	2018-03-07	ASM298055v1	Chinese Academy of Forestry	GCA_002980555.1	identical	ftp://ftp.ncbi.nlm.nih.gov/genomes/all/GCF/002/980/555/GCF_002980555.1_ASM298055v1		assembly from type material	5437700	59.32	104	0.9905	1.0096	0.9814	1.0017	44	782320	3	230101	9	5203
GCF_003010935.1	PRJNA224116	SAMN08010943	PGGN00000000.1	representative genome	1149773	1149773	Phyllobacterium endophyticum	strain=PEPV15		latest	Contig	Major	Full	2018-03-19	ASM301093v1	ARRIAM	GCA_003010935.1	identical	ftp://ftp.ncbi.nlm.nih.gov/genomes/all/GCF/003/010/935/GCF_003010935.1_ASM301093v1		assembly from type material	5512535	57	104	0.9905	1.0096	0.9814	1.0214	12	1246797	2	268386	6	5320
GCF_003010955.1	PRJNA224116	SAMN08010942	PGGO00000000.1	representative genome	314235	314235	Phyllobacterium brassicacearum	strain=STM 196		latest	Contig	Major	Full	2018-03-19	ASM301095v1	ARRIAM	GCA_003010955.1	identical	ftp://ftp.ncbi.nlm.nih.gov/genomes/all/GCF/003/010/955/GCF_003010955.1_ASM301095v1		assembly from type material	5793994	57.32	104	0.9905	1.0096	0.9814	1.026	87	192543	10	59196	30	5895
GCF_003010965.1	PRJNA224116	SAMN08010944	PGGM00000000.1	representative genome	1520277	1520277	Phyllobacterium sophorae	strain=CCBAU 03422		latest	Contig	Major	Full	2018-03-19	ASM301096v1	ARRIAM	GCA_003010965.1	identical	ftp://ftp.ncbi.nlm.nih.gov/genomes/all/GCF/003/010/965/GCF_003010965.1_ASM301096v1		assembly from type material	6358399	57.04	104	0.9905	1.0096	0.9814	1.026	49	289216	6	134328	18	6309
GCF_003012705.1	PRJNA224116	SAMN08708030	PXYL00000000.1	na	1295366	1295366	Mesorhizobium soli	strain=JCM 19897		latest	Contig	Major	Full	2018-03-20	ASM301270v1	Chinese Academy of Forestry	GCA_003012705.1	identical	ftp://ftp.ncbi.nlm.nih.gov/genomes/all/GCF/003/012/705/GCF_003012705.1_ASM301270v1		assembly from type material	6267176	62.57	104	0.9905	1.0096	0.9814	1.026	118	336579	7	51601	25	6024
GCF_003012745.1	PRJNA224116	SAMN08707968	PXYK00000000.1	representative genome	2116701	2116701	Mesorhizobium ephedrae	strain=6GN-30		latest	Contig	Major	Full	2018-03-20	ASM301274v1	Chinese Academy of Forestry	GCA_003012745.1	identical	ftp://ftp.ncbi.nlm.nih.gov/genomes/all/GCF/003/012/745/GCF_003012745.1_ASM301274v1		assembly from type material	6112273	66.43	104	0.9905	1.0288	0.9814	1.0383	115	165777	13	52424	37	5817
GCF_003024595.1	PRJNA224116	SAMN08731602	PYJP00000000.1	representative genome	69974	69974	Mesorhizobium plurifarium	strain=LMG 11892		latest	Contig	Major	Full	2018-03-28	ASM302459v1	Univ Estadual Paulista UNESP/FCAV	GCA_003024595.1	identical	ftp://ftp.ncbi.nlm.nih.gov/genomes/all/GCF/003/024/595/GCF_003024595.1_ASM302459v1		assembly from type material	4422102	62.38	105	1	1.2	1	1.1446	35	459292	4	95772	12	4122
GCF_003024615.1	PRJNA224116	SAMN08731601	PYJO00000000.1	na	381	381	Mesorhizobium loti	strain=LMG 6125		latest	Contig	Major	Full	2018-03-28	ASM302461v1	Univ Estadual Paulista UNESP/FCAV	GCA_003024615.1	identical	ftp://ftp.ncbi.nlm.nih.gov/genomes/all/GCF/003/024/615/GCF_003024615.1_ASM302461v1		assembly from type material	4879191	62.62	103	0.981	1.1748	0.9979	1.1806	52	285730	6	54681	22	4650
GCF_003034915.1	PRJNA224116	SAMN08802955	PZJX00000000.1	representative genome	1776423	1776423	Mesorhizobium helmanticense	strain=CSLC115N		latest	Contig	Major	Full	2018-04-05	ASM303491v1	Instituto de Biotecnologia y Biologia Molecular	GCA_003034915.1	identical	ftp://ftp.ncbi.nlm.nih.gov/genomes/all/GCF/003/034/915/GCF_003034915.1_ASM303491v1		assembly from type material	6879637	62.42	104	0.9905	1.0385	0.9814	1.0607	145	181688	14	31975	43	6588
GCF_003046475.1	PRJNA224116	SAMN08769590	PZZZ00000000.1	representative genome	28320	28320	Mycoplana dimorpha	strain=DSM 7138		latest	Scaffold	Major	Full	2018-04-09	ASM304647v1	DOE Joint Genome Institute	GCA_003046475.1	identical	ftp://ftp.ncbi.nlm.nih.gov/genomes/all/GCF/003/046/475/GCF_003046475.1_ASM304647v1		assembly from type material	4592697	64.52	104	0.9905	1.0096	0.9814	1.026	22	583305	4	163296	9	4226
GCF_003049685.1	PRJNA224116	SAMN08800193	PYSY00000000.2	na	571256	571256	Ochrobactrum pituitosum	strain=CCUG 50899		latest	Contig	Major	Full	2018-06-26	ASM304968v2	Intercollegiate Faculty of Biotechnology UG&MUG	GCA_003049685.2	identical	ftp://ftp.ncbi.nlm.nih.gov/genomes/all/GCF/003/049/685/GCF_003049685.1_ASM304968v2		assembly from type material	5518186	53.42	104	0.9905	1.0865	0.9814	1.1275	10	1723726	2	161918	4	5535
GCF_003053845.1	PRJNA224116	SAMN08776944	QAYG00000000.1	representative genome	665038	665038	Breoghania corrubedonensis	strain=DSM 23382		latest	Contig	Major	Full	2018-04-17	ASM305384v1	DOE Joint Genome Institute	GCA_003053845.1	identical	ftp://ftp.ncbi.nlm.nih.gov/genomes/all/GCF/003/053/845/GCF_003053845.1_ASM305384v1		assembly from type material	5331589	63.62	104	0.9905	1.0192	0.9814	1.0224	21	403143	3	178018	11	4689
GCF_003056345.1	PRJNA224116	SAMN08781060	PYWB00000000.1	representative genome	1173082	1173082	Devosia submarina	strain=JCM 18935		latest	Contig	Major	Full	2018-04-18	ASM305634v1	Zhejiang Wanli University	GCA_003056345.1	identical	ftp://ftp.ncbi.nlm.nih.gov/genomes/all/GCF/003/056/345/GCF_003056345.1_ASM305634v1		assembly from type material	3980379	60.41	105	1	1.0381	1	1.0816	45	328865	5	92843	13	3903
GCF_003056405.1	PRJNA224116	SAMN08781054	PYVZ00000000.1	representative genome	2079253	2079253	Devosia indica	strain=IO390501		latest	Scaffold	Major	Full	2018-04-18	ASM305640v1	Zhejiang Wanli University	GCA_003056405.1	identical	ftp://ftp.ncbi.nlm.nih.gov/genomes/all/GCF/003/056/405/GCF_003056405.1_ASM305640v1		assembly from type material	3953940	61.91	105	1	1	1	1	69	156929	8	68509	21	3895
GCF_003058325.1	PRJNA224116	SAMN08828928		representative genome	2051553	2051553	Methylobacterium currus	strain=PR1016A		latest	Chromosome	Major	Full	2018-04-21	ASM305832v1	Korea university	GCA_003058325.1	identical	ftp://ftp.ncbi.nlm.nih.gov/genomes/all/GCF/003/058/325/GCF_003058325.1_ASM305832v1		assembly from type material	7745135	70.19	103	0.981	1.0194	0.9743	1.04	5	6553813	1	974845	2	7130
GCF_003058385.1	PRJNA224116	SAMN08929321	QBLB00000000.1	na	754774	384	Rhizobium leguminosarum bv. viciae USDA 2370	strain=USDA 2370		latest	Contig	Major	Full	2018-04-21	ASM305838v1	UPM	GCA_003058385.1	identical	ftp://ftp.ncbi.nlm.nih.gov/genomes/all/GCF/003/058/385/GCF_003058385.1_ASM305838v1		assembly from type material	7851935	60.57	103	0.981	1.0194	0.9813	1.0257	108	413138	5	61813	24	7517
GCF_003096615.1	PRJNA224116	SAMN08769567	QEKZ00000000.1	representative genome	410	410	Methylobacterium organophilum	strain=DSM 760		latest	Scaffold	Major	Full	2018-05-07	ASM309661v1	DOE Joint Genome Institute	GCA_003096615.1	identical	ftp://ftp.ncbi.nlm.nih.gov/genomes/all/GCF/003/096/615/GCF_003096615.1_ASM309661v1		assembly from type material	6750984	71.38	103	0.981	1.0291	0.9743	1.0545	85	170701	12	45874	40	6345
GCF_003113265.1	PRJNA224116	SAMN08554708	PUIV00000000.1	representative genome	428	428	Methylosinus sporium	strain=DSM 17706		latest	Contig	Major	Full	2018-05-10	ASM311326v1	Radboud University	GCA_003113265.1	identical	ftp://ftp.ncbi.nlm.nih.gov/genomes/all/GCF/003/113/265/GCF_003113265.1_ASM311326v1		assembly from type material	3785845	65.24	104	0.9905	1	0.9998	1	55	96528	11	38136	35	3537
GCF_003122325.1	PRJNA224116	SAMN09039335	QFBC00000000.1	representative genome	2182425	2182425	Rhizobium album	strain=NS-104		latest	Contig	Major	Full	2018-05-13	ASM312232v1	Nanjing Agricultural University	GCA_003122325.1	identical	ftp://ftp.ncbi.nlm.nih.gov/genomes/all/GCF/003/122/325/GCF_003122325.1_ASM312232v1		assembly from type material	6868712	61.93	104	0.9905	1.0385	0.9883	1.0718	62	302817	7	77397	22	6630
GCF_003148475.1	PRJNA224116	SAMN08770120	QGGG00000000.1	representative genome	93369	93369	Pseudaminobacter salicylatoxidans	strain=DSM 6986		latest	Scaffold	Major	Full	2018-05-22	ASM314847v1	DOE Joint Genome Institute	GCA_003148475.1	identical	ftp://ftp.ncbi.nlm.nih.gov/genomes/all/GCF/003/148/475/GCF_003148475.1_ASM314847v1		assembly from type material	4836797	62.67	104	0.9905	1.0481	0.9814	1.0436	43	232367	7	64731	21	4698
GCF_003148495.1	PRJNA224116	SAMN08775555	QGGH00000000.1	na	381	381	Mesorhizobium loti	strain=DSM 2626		latest	Scaffold	Major	Full	2018-05-22	ASM314849v1	DOE Joint Genome Institute	GCA_003148495.1	identical	ftp://ftp.ncbi.nlm.nih.gov/genomes/all/GCF/003/148/495/GCF_003148495.1_ASM314849v1		assembly from type material	7451806	62.35	104	0.9905	1.0481	0.9814	1.081	52	607128	4	107788	18	7267
GCF_003149475.2	PRJNA224116	SAMN09039181	QFWV00000000.2	representative genome	2184161	2184161	Oceaniradius stylonematis	strain=StC1		latest	Scaffold	Major	Full	2018-10-02	ASM314947v2	Chung-Ang university	GCA_003149475.2	identical	ftp://ftp.ncbi.nlm.nih.gov/genomes/all/GCF/003/149/475/GCF_003149475.2_ASM314947v2		assembly from type material	3581627	64.74	102	0.9714	1	0.9802	1	23	444929	3	213772	7	3505
GCF_003173715.1	PRJNA224116	SAMN09235291		representative genome	2202825	2202825	Methylobacterium durans	strain=17SD2-17		latest	Complete Genome	Major	Full	2018-05-29	ASM317371v1	Seoul Women's University	GCA_003173715.1	identical	ftp://ftp.ncbi.nlm.nih.gov/genomes/all/GCF/003/173/715/GCF_003173715.1_ASM317371v1		assembly from type material	6788375	68.74	103	0.981	1.0097	0.9743	1.0228	1	6788375	1	6788375	1	6791
GCF_003173755.1	PRJNA224116	SAMN09235361		representative genome	2202827	2202827	Methylobacterium terrae	strain=17Sr1-28		latest	Complete Genome	Major	Full	2018-05-29	ASM317375v1	Seoul Women's University	GCA_003173755.1	identical	ftp://ftp.ncbi.nlm.nih.gov/genomes/all/GCF/003/173/755/GCF_003173755.1_ASM317375v1		assembly from type material	6162702	71.56	100	0.9524	1.01	0.9528	1.0233	1	6162702	1	6162702	1	5627
GCF_003182235.1	PRJNA224116	SAMN09065088	QGTP00000000.1	na	28101	28101	Phyllobacterium myrsinacearum	strain=IAM 13584		latest	Scaffold	Major	Full	2018-05-31	ASM318223v1	DOE Joint Genome Institute	GCA_003182235.1	identical	ftp://ftp.ncbi.nlm.nih.gov/genomes/all/GCF/003/182/235/GCF_003182235.1_ASM318223v1		assembly from type material	5420195	59.32	104	0.9905	1.0096	0.9814	1.0017	32	326763	5	89690	17	5192
GCF_003182275.1	PRJNA224116	SAMN09074944	QGTR00000000.1	representative genome	274592	274592	Hoeflea marina	strain=DSM 16791		latest	Scaffold	Major	Full	2018-05-31	ASM318227v1	DOE Joint Genome Institute	GCA_003182275.1	identical	ftp://ftp.ncbi.nlm.nih.gov/genomes/all/GCF/003/182/275/GCF_003182275.1_ASM318227v1		assembly from type material	5261965	64.95	103	0.981	1	0.9722	1	21	911015	3	199314	7	4799
GCF_003201475.1	PRJNA224116	SAMN08769589	QJJK00000000.1	representative genome	28210	28210	Chelatococcus asaccharovorans	strain=DSM 6462		latest	Scaffold	Major	Full	2018-06-07	ASM320147v1	DOE Joint Genome Institute	GCA_003201475.1	identical	ftp://ftp.ncbi.nlm.nih.gov/genomes/all/GCF/003/201/475/GCF_003201475.1_ASM320147v1		assembly from type material	7254611	63.99	103	0.981	1	0.9497	1	40	476980	6	139748	17	6679
GCF_003205195.1	PRJNA224116	SAMN09298572	QJRY00000000.1	representative genome	1986026	1986026	Rhizobium wuzhouense	strain=W44		latest	Contig	Major	Full	2018-06-10	ASM320519v1	South China Agricultural University	GCA_003205195.1	identical	ftp://ftp.ncbi.nlm.nih.gov/genomes/all/GCF/003/205/195/GCF_003205195.1_ASM320519v1		assembly from type material	4933972	61.62	103	0.981	1.0194	0.9813	1.0123	32	493163	4	124082	10	4751
GCF_003217235.1	PRJNA224116	SAMN08775270	QJTF00000000.1	representative genome	314237	314237	Phyllobacterium leguminum	strain=ORS 1419		latest	Scaffold	Major	Full	2018-06-12	ASM321723v1	DOE Joint Genome Institute	GCA_003217235.1	identical	ftp://ftp.ncbi.nlm.nih.gov/genomes/all/GCF/003/217/235/GCF_003217235.1_ASM321723v1		assembly from type material	3737298	59.84	104	0.9905	1	0.9814	1	68	139063	9	35337	28	3601
GCF_003217325.1	PRJNA224116	SAMN05877808	QJTI00000000.1	representative genome	99655	99655	Rhodopseudomonas faecalis	strain=JCM 11668		latest	Scaffold	Major	Full	2018-06-12	ASM321732v1	DOE Joint Genome Institute	GCA_003217325.1	identical	ftp://ftp.ncbi.nlm.nih.gov/genomes/all/GCF/003/217/325/GCF_003217325.1_ASM321732v1		assembly from type material	4068611	64.23	104	0.9905	1	0.9814	1	62	151163	10	50081	28	3740
GCF_003234965.1	PRJNA224116	SAMN09236930	QKVK00000000.1	representative genome	2650924	2650924	Aestuariivirga litoralis	strain=KCTC 52945		latest	Contig	Major	Full	2018-06-18	ASM323496v1	Sun Yat-sen University. SYSU	GCA_003234965.1	identical	ftp://ftp.ncbi.nlm.nih.gov/genomes/all/GCF/003/234/965/GCF_003234965.1_ASM323496v1		assembly from type material	4231275	65.47	104	0.9905	1.0288	0.9814	1.0607	26	365037	4	114671	10	4026
GCF_003240565.1	PRJNA224116	SAMN07689692	PCDQ00000000.1	representative genome	2041385	2041385	Rhizobium tumorigenes	strain=1078		latest	Contig	Major	Full	2018-06-18	ASM324056v1	Julius Kuehn-Institut. Federal Research Centre for Cultivated Plants (JKI). EP	GCA_003240565.1	identical	ftp://ftp.ncbi.nlm.nih.gov/genomes/all/GCF/003/240/565/GCF_003240565.1_ASM324056v1		assembly from type material	5899412	59.99	104	0.9905	1.0192	0.9814	1.0257	129	286636	6	33195	28	5607
GCF_003240585.1	PRJNA224116	SAMN07689693	PCDP00000000.1	representative genome	484088	484088	Rhizobium tubonense	strain=CCBAU 85046		latest	Contig	Major	Full	2018-06-18	ASM324058v1	Julius Kuehn-Institut. Federal Research Centre for Cultivated Plants (JKI). EP	GCA_003240585.1	identical	ftp://ftp.ncbi.nlm.nih.gov/genomes/all/GCF/003/240/585/GCF_003240585.1_ASM324058v1		assembly from type material	6540512	59.27	104	0.9905	1.0288	0.9814	1.0337	85	177535	8	57073	33	6388
GCF_003258765.1	PRJNA224116	SAMN07423845	NPET00000000.1	na	1074	1074	Rhodoblastus acidophilus	strain=DSM 137		latest	Scaffold	Major	Full	2018-06-20	ASM325876v1	Indiana University	GCA_003258765.1	identical	ftp://ftp.ncbi.nlm.nih.gov/genomes/all/GCF/003/258/765/GCF_003258765.1_ASM325876v1		assembly from type material	4723883	65.2	104	0.9905	1	0.9814	1	246	47948	32	13156	102	4566
GCF_003258805.1	PRJNA224116	SAMN07423869	NPEU00000000.1	representative genome	29408	29408	Rhodoplanes elegans	strain=DSM 11907		latest	Scaffold	Major	Full	2018-06-20	ASM325880v1	Indiana University	GCA_003258805.1	identical	ftp://ftp.ncbi.nlm.nih.gov/genomes/all/GCF/003/258/805/GCF_003258805.1_ASM325880v1		assembly from type material	6502640	69.43	104	0.9905	1.0288	0.9814	1.0355	1103	11051	167	2960	603	6483
GCF_003258835.1	PRJNA224116	SAMN07424250	NPEV00000000.1	representative genome	34017	34017	Rhodobium orientis	strain=DSM 11290		latest	Scaffold	Major	Full	2018-06-20	ASM325883v1	Indiana University	GCA_003258835.1	identical	ftp://ftp.ncbi.nlm.nih.gov/genomes/all/GCF/003/258/835/GCF_003258835.1_ASM325883v1		assembly from type material	5189386	65.37	104	0.9905	1.0288	0.9814	1.0628	244	70567	22	22440	67	4794
GCF_003258855.1	PRJNA224116	SAMN07424629	NPEW00000000.1	na	444923	444923	Rhodoplanes piscinae	strain=DSM 19946		latest	Scaffold	Major	Full	2018-06-20	ASM325885v1	Indiana University	GCA_003258855.1	identical	ftp://ftp.ncbi.nlm.nih.gov/genomes/all/GCF/003/258/855/GCF_003258855.1_ASM325885v1		assembly from type material	5370996	70.15	104	0.9905	1.0481	0.9814	1.0582	880	15387	103	3977	367	5435
GCF_003258865.1	PRJNA224116	SAMN07424630	NPEX00000000.1	representative genome	29409	29409	Rhodoplanes roseus	strain=DSM 5909		latest	Scaffold	Major	Full	2018-06-20	ASM325886v1	Indiana University	GCA_003258865.1	identical	ftp://ftp.ncbi.nlm.nih.gov/genomes/all/GCF/003/258/865/GCF_003258865.1_ASM325886v1		assembly from type material	6879536	69.29	104	0.9905	1.0385	0.9814	1.057	1040	19390	103	4414	387	6824
GCF_003258905.1	PRJNA224116	SAMN03080610	NPBC00000000.1	na	1120955	1080	Afifella marina DSM 2698	strain=DSM 2698		latest	Scaffold	Major	Full	2018-06-20	ASM325890v1	Indiana University	GCA_003258905.1	identical	ftp://ftp.ncbi.nlm.nih.gov/genomes/all/GCF/003/258/905/GCF_003258905.1_ASM325890v1		assembly from type material	3969073	63.24	103	0.981	1.0097	0.9732	1.0004	59	212236	7	83770	17	3693
GCF_003259955.1	PRJNA224116	SAMN08769262	QLMK00000000.1	representative genome	1293442	1293442	Falsochrobactrum ovis	strain=DSM 26720		latest	Scaffold	Major	Full	2018-06-21	ASM325995v1	DOE Joint Genome Institute	GCA_003259955.1	identical	ftp://ftp.ncbi.nlm.nih.gov/genomes/all/GCF/003/259/955/GCF_003259955.1_ASM325995v1		assembly from type material	3271822	50.66	104	0.9905	1.0192	0.9814	1.0362	39	187524	4	40284	18	3153
GCF_003289945.1	PRJNA224116	SAMN09456072	QMBP00000000.1	representative genome	1209954	1209954	Mesorhizobium hawassense	strain=AC99b		latest	Contig	Major	Full	2018-07-06	ASM328994v1	Empresa Brasileira de Pesquisa Agropecuaria	GCA_003289945.1	identical	ftp://ftp.ncbi.nlm.nih.gov/genomes/all/GCF/003/289/945/GCF_003289945.1_ASM328994v1		assembly from type material	7338563	63.34	104	0.9905	1.0288	0.9814	1.0607	71	303349	8	74984	25	7001
GCF_003314995.1	PRJNA224116	SAMN09074870	QNRH00000000.1	representative genome	354351	354351	Pseudochrobactrum asaccharolyticum	strain=DSM 25619		latest	Scaffold	Major	Full	2018-07-12	ASM331499v1	DOE Joint Genome Institute	GCA_003314995.1	identical	ftp://ftp.ncbi.nlm.nih.gov/genomes/all/GCF/003/314/995/GCF_003314995.1_ASM331499v1		assembly from type material	4649592	50.81	105	1	1.019	1	1.0235	39	641676	3	79515	11	4259
GCF_003315135.1	PRJNA224116	SAMN09074757	QNRK00000000.1	representative genome	1473586	1473586	Roseiarcus fermentans	strain=DSM 24875		latest	Scaffold	Major	Full	2018-07-12	ASM331513v1	DOE Joint Genome Institute	GCA_003315135.1	identical	ftp://ftp.ncbi.nlm.nih.gov/genomes/all/GCF/003/315/135/GCF_003315135.1_ASM331513v1		assembly from type material	6792213	68.23	105	1	1.019	1	1.0444	91	145054	17	50699	47	6206
GCF_003324485.1	PRJNA224116	SAMN09580333	QODK00000000.1	representative genome	2211145	2211145	Cohaesibacter intestini	strain=YE-B6		latest	Contig	Major	Full	2018-07-16	ASM332448v1	Third Institute of Oceanography. State Oceanic Administration	GCA_003324485.1	identical	ftp://ftp.ncbi.nlm.nih.gov/genomes/all/GCF/003/324/485/GCF_003324485.1_ASM332448v1		assembly from type material	4789803	55.57	104	0.9905	1.0096	0.9814	1.0123	27	1119155	2	187534	7	4253
GCF_003332305.1	PRJNA224116	SAMN09517645	QOIO00000000.1	representative genome	670291	670291	Microvirga aerophila	strain=DSM 21344		latest	Contig	Major	Full	2018-07-20	ASM333230v1	Guangdong institute of Microbiology	GCA_003332305.1	identical	ftp://ftp.ncbi.nlm.nih.gov/genomes/all/GCF/003/332/305/GCF_003332305.1_ASM333230v1		assembly from type material	6003377	62.05	105	1	1.019	1	1.0432	184	101852	21	15662	76	6112
GCF_003335045.1	PRJNA224116	SAMN09662771	QOZG00000000.1	representative genome	1899321	1899321	Phyllobacterium salinisoli	strain=LLAN61		latest	Contig	Major	Full	2018-07-21	ASM333504v1	Chinese Academy of Forestry	GCA_003335045.1	identical	ftp://ftp.ncbi.nlm.nih.gov/genomes/all/GCF/003/335/045/GCF_003335045.1_ASM333504v1		assembly from type material	5058279	59.87	104	0.9905	1.0096	0.9814	1.0003	188	502790	5	30703	17	5032
GCF_003337575.1	PRJNA224116	SAMN08775269	QPJM00000000.1	representative genome	314236	314236	Phyllobacterium bourgognense	strain=31-25a		latest	Scaffold	Major	Full	2018-07-24	ASM333757v1	DOE Joint Genome Institute	GCA_003337575.1	identical	ftp://ftp.ncbi.nlm.nih.gov/genomes/all/GCF/003/337/575/GCF_003337575.1_ASM333757v1		assembly from type material	5618596	56.44	104	0.9905	1	0.9814	1	61	228269	7	48041	24	5592
GCF_003337715.1	PRJNA224116	SAMN09074871	QPIX00000000.1	representative genome	1197950	1197950	Ciceribacter lividus	strain=DSM 25528		latest	Scaffold	Major	Full	2018-07-24	ASM333771v1	DOE Joint Genome Institute	GCA_003337715.1	identical	ftp://ftp.ncbi.nlm.nih.gov/genomes/all/GCF/003/337/715/GCF_003337715.1_ASM333771v1		assembly from type material	4521451	63.2	103	0.981	1	0.9813	1	32	334985	5	115969	13	4280
GCF_003347665.1	PRJNA224116	SAMN08972775	QDGA00000000.1	representative genome	2078013	2078013	Microvirga calopogonii	strain=CCBAU 65841		latest	Scaffold	Major	Full	2018-07-31	ASM334766v1	Southwest Forestry University	GCA_003347665.1	identical	ftp://ftp.ncbi.nlm.nih.gov/genomes/all/GCF/003/347/665/GCF_003347665.1_ASM334766v1		assembly from type material	7413381	62.47	105	1	1.0762	1	1.0604	249	85556	22	12872	124	7379
Methylorubrum extorquens	PRJNA224116	SAMN09064736	QQBB00000000.1	representative genome	186651	186651	Microvirga subterranea	strain=DSM 14364		latest	Scaffold	Major	Full	2018-07-31	ASM335053v1	DOE Joint Genome Institute	GCA_003350535.1	identical	ftp://ftp.ncbi.nlm.nih.gov/genomes/all/GCF/003/350/535/GCF_003350535.1_ASM335053v1		assembly from type material	5147802	65.13	105	1	1.0286	1	1.0432	36	519753	4	86701	13	4899
GCF_003367395.1	PRJNA224116	SAMN09742692		representative genome	331696	331696	Pseudolabrys taiwanensis	strain=CC-BB4		latest	Chromosome	Major	Full	2018-08-08	ASM336739v1	Korea Institute of Geoscience and Mineral Resources	GCA_003367395.1	identical	ftp://ftp.ncbi.nlm.nih.gov/genomes/all/GCF/003/367/395/GCF_003367395.1_ASM336739v1		assembly from type material	5593741	64.39	103	0.981	1.0194	0.9732	1.0477	1	5593741	1	5593741	1	5286
GCF_003385925.1	PRJNA224116	SAMN05892882	QRDT00000000.1	na	999699	999699	Rhodopseudomonas pentothenatexigens	strain=JA575		latest	Scaffold	Major	Full	2018-08-14	ASM338592v1	DOE Joint Genome Institute	GCA_003385925.1	identical	ftp://ftp.ncbi.nlm.nih.gov/genomes/all/GCF/003/385/925/GCF_003385925.1_ASM338592v1		assembly from type material	5383361	65.97	103	0.981	1.0097	0.9813	1.0227	69	194650	11	43698	35	4904
GCF_003387225.1	PRJNA224116	SAMN09064159	QUMO00000000.1	na	569860	569860	Methylovirgula ligni	strain=BW863		latest	Scaffold	Major	Full	2018-08-14	ASM338722v1	DOE Joint Genome Institute	GCA_003387225.1	identical	ftp://ftp.ncbi.nlm.nih.gov/genomes/all/GCF/003/387/225/GCF_003387225.1_ASM338722v1		assembly from type material	3292724	62.29	104	0.9905	1	0.9745	1	8	931588	2	207767	5	3184
GCF_003403015.1	PRJNA224116	SAMN09780445	QURL00000000.1	representative genome	2293836	2293836	Fulvimarina endophytica	strain=85		latest	Contig	Major	Full	2018-08-18	ASM340301v1	Research Center for Medicine & Biology	GCA_003403015.1	identical	ftp://ftp.ncbi.nlm.nih.gov/genomes/all/GCF/003/403/015/GCF_003403015.1_ASM340301v1		assembly from type material	4372088	65.43	104	0.9905	1.0096	0.9814	1.0227	28	586967	4	152059	9	3937
GCF_003403035.1	PRJNA224116	SAMN09789026	QURN00000000.1	representative genome	2294114	2294114	Mesorhizobium denitrificans	strain=LA-28		latest	Contig	Major	Full	2018-08-18	ASM340303v1	Hankyong National University	GCA_003403035.1	identical	ftp://ftp.ncbi.nlm.nih.gov/genomes/all/GCF/003/403/035/GCF_003403035.1_ASM340303v1		assembly from type material	4375801	58.44	104	0.9905	1	0.9814	1	45	248341	6	60200	18	4232
GCF_003547145.1	PRJNA224116	SAMN09934861	QWVU00000000.1	na	1076	1076	Rhodopseudomonas palustris	strain=R1		latest	Scaffold	Major	Full	2018-09-12	ASM354714v1	Bellevue University	GCA_003547145.1	identical	ftp://ftp.ncbi.nlm.nih.gov/genomes/all/GCF/003/547/145/GCF_003547145.1_ASM354714v1		assembly from synonym type material	5308236	64.94	103	0.981	1.0097	0.9813	1.0311	122	90178	19	22464	62	4855
GCF_003550175.1	PRJNA224116	SAMN06265363	QXDF00000000.1	representative genome	933063	933063	Dichotomicrobium thermohalophilum	strain=DSM 5002		latest	Contig	Major	Full	2018-09-12	ASM355017v1	DOE Joint Genome Institute	GCA_003550175.1	identical	ftp://ftp.ncbi.nlm.nih.gov/genomes/all/GCF/003/550/175/GCF_003550175.1_ASM355017v1		assembly from type material	2988045	64.29	105	1	1.0095	1	1.022	7	2150849	1	195270	3	2776
GCF_003574465.1	PRJNA224116	SAMN09644085	QOWC00000000.1	representative genome	1697972	1697972	Methylobacterium crusticola	strain=MIMD6		latest	Scaffold	Major	Full	2018-09-18	ASM357446v1	inner mongolia ariculture university	GCA_003574465.1	identical	ftp://ftp.ncbi.nlm.nih.gov/genomes/all/GCF/003/574/465/GCF_003574465.1_ASM357446v1		assembly from type material	7502080	73.03	104	0.9905	1.0288	0.9998	1.0539	463	33995	69	9293	225	7079
GCF_003574655.1	PRJNA224116	SAMN09580698	QNUM00000000.1	representative genome	1162980	1162980	Cohaesibacter haloalkalitolerans	strain=JC131		latest	Contig	Major	Full	2018-09-18	ASM357465v1	Third Institute of Oceanography. State Oceanic Administration	GCA_003574655.1	identical	ftp://ftp.ncbi.nlm.nih.gov/genomes/all/GCF/003/574/655/GCF_003574655.1_ASM357465v1		assembly from type material	5014206	57.07	104	0.9905	1.0096	0.9814	1.0123	24	551965	4	96180	10	4411
GCF_003583935.1	PRJNA224116	SAMN10037319	QYRN00000000.1	representative genome	2320271	2320271	Aureimonas flava	strain=M2BS4Y-1		latest	Contig	Major	Full	2018-09-20	ASM358393v1	Research Center for Medicine & Biology	GCA_003583935.1	identical	ftp://ftp.ncbi.nlm.nih.gov/genomes/all/GCF/003/583/935/GCF_003583935.1_ASM358393v1		assembly from type material	4090174	70.02	104	0.9905	1.0385	0.9814	1.0823	26	424277	4	84669	11	3865
GCF_003601975.1	PRJNA224116	SAMN10038457	QZWZ00000000.1	representative genome	1300307	1300307	Mesorhizobium waimense	strain=ICMP19557		latest	Contig	Major	Full	2018-10-01	ASM360197v1	Murdoch University	GCA_003601975.1	identical	ftp://ftp.ncbi.nlm.nih.gov/genomes/all/GCF/003/601/975/GCF_003601975.1_ASM360197v1		assembly from type material	8154593	62.38	104	0.9905	1.0288	0.9814	1.0607	290	169793	15	29934	63	8078
GCF_003601985.1	PRJNA224116	SAMN10038530	QZXA00000000.1	representative genome	1777867	1777867	Mesorhizobium jarvisii	strain=LMG 28313		latest	Contig	Major	Full	2018-10-01	ASM360198v1	Murdoch University	GCA_003601985.1	identical	ftp://ftp.ncbi.nlm.nih.gov/genomes/all/GCF/003/601/985/GCF_003601985.1_ASM360198v1		assembly from type material	6635082	63.19	104	0.9905	1.0192	0.9814	1.0383	48	451958	6	110708	16	6489
GCF_003610435.1	PRJNA224116	SAMN09074966	RAQD00000000.1	na	1235591	1235591	Pseudorhodoplanes sinuspersici	strain=CECT 8374		latest	Contig	Major	Full	2018-10-02	ASM361043v1	DOE Joint Genome Institute	GCA_003610435.1	identical	ftp://ftp.ncbi.nlm.nih.gov/genomes/all/GCF/003/610/435/GCF_003610435.1_ASM361043v1		assembly from type material	5963372	60.32	104	0.9905	1.0288	0.9814	1.0669	16	1007672	2	478408	5	5798
GCF_003627755.1	PRJNA224116	SAMN10118526		representative genome	1312183	1312183	Rhizobium jaguaris	strain=CCGE525		latest	Complete Genome	Major	Full	2018-10-09	ASM362775v1	Center for Genomic Sciences	GCA_003627755.1	identical	ftp://ftp.ncbi.nlm.nih.gov/genomes/all/GCF/003/627/755/GCF_003627755.1_ASM362775v1		assembly from type material	8025568	59.43	104	0.9905	1.0673	0.9814	1.0828	4	4575315	1	550563	3	7614
GCF_003664555.1	PRJNA224116	SAMN10187550	RCHH00000000.1	representative genome	2448455	2448455	Ochrobactrum soli	strain=BO-7		latest	Contig	Major	Full	2018-10-16	ASM366455v1	Hankyong National University	GCA_003664555.1	identical	ftp://ftp.ncbi.nlm.nih.gov/genomes/all/GCF/003/664/555/GCF_003664555.1_ASM366455v1		assembly from type material	5024120	57.16	104	0.9905	1.0192	0.9814	1.0362	48	359264	5	54517	21	4745
GCF_003667445.1	PRJNA224116	SAMN10232499	RCTF00000000.1	representative genome	60216	60216	Xanthobacter tagetidis	strain=ATCC 700314		latest	Contig	Major	Full	2018-10-21	ASM366744v1	maclea_lab	GCA_003667445.1	identical	ftp://ftp.ncbi.nlm.nih.gov/genomes/all/GCF/003/667/445/GCF_003667445.1_ASM366744v1		assembly from type material	4945221	69.48	104	0.9905	1.0192	0.9814	1.0463	87	229695	8	96058	22	4550
GCF_003668555.1	PRJNA224116	SAMN10220050	RCWN00000000.1	representative genome	2670375	2670375	Notoacmeibacter ruber	strain=M2BS9Y-3-1		latest	Contig	Major	Full	2018-10-22	ASM366855v1	Research Center for Medicine & Biology	GCA_003668555.1	identical	ftp://ftp.ncbi.nlm.nih.gov/genomes/all/GCF/003/668/555/GCF_003668555.1_ASM366855v1		assembly from type material	3254790	60.04	104	0.9905	1	0.9814	1	4	3023540	1	3023540	1	3090
GCF_003722355.1	PRJNA224116	SAMN09908883	QWDD00000000.1	representative genome	369798	369798	Methylocystis hirsuta	strain=CSC1		latest	Contig	Major	Full	2018-11-13	ASM372235v1	University of Valladolid	GCA_003722355.1	identical	ftp://ftp.ncbi.nlm.nih.gov/genomes/all/GCF/003/722/355/GCF_003722355.1_ASM372235v1		assembly from type material	4213043	62.43	104	0.9905	1.0481	0.9745	1.0504	4	3776027	1	260028	2	4179
GCF_003863365.1	PRJNA224116	SAMN10482962	RQXT00000000.1	representative genome	425306	425306	Mesorhizobium tamadayense	strain=DSM 28320		latest	Contig	Major	Full	2018-12-04	ASM386336v1	Beijing Academy of Agriculture and Forestry Science	GCA_003863365.1	identical	ftp://ftp.ncbi.nlm.nih.gov/genomes/all/GCF/003/863/365/GCF_003863365.1_ASM386336v1		assembly from type material	7534097	63.16	104	0.9905	1.0673	0.9814	1.071	303	99038	22	28391	74	7419
GCF_003934165.1	PRJNA224116	SAMN10373289	RKST00000000.1	representative genome	1851146	1851146	Pseudaminobacter arsenicus	strain=CB3		latest	Scaffold	Major	Full	2018-12-11	ASM393416v1	China University of Geosciences	GCA_003934165.1	identical	ftp://ftp.ncbi.nlm.nih.gov/genomes/all/GCF/003/934/165/GCF_003934165.1_ASM393416v1		assembly from type material	5448824	58.76	104	0.9905	1.0288	0.9814	1.0552	107	241998	7	34012	29	5096
GCF_003938655.1	PRJNA224116	SAMN10387321	RJJT00000000.1	representative genome	574561	574561	Rhizobium pisi	strain=DSM 30132		latest	Contig	Major	Full	2018-12-11	ASM393865v1	North West Agriculture and Forestry University	GCA_003938655.1	identical	ftp://ftp.ncbi.nlm.nih.gov/genomes/all/GCF/003/938/655/GCF_003938655.1_ASM393865v1		assembly from type material	6677025	60.97	105	1	1.0286	1	1.0376	72	283356	10	63350	31	6487
GCF_003939025.1	PRJNA224116	SAMN10390643	RQIH00000000.1	representative genome	1535245	1535245	Rhizobium sophoriradicis	strain=CCBAU 03470		latest	Contig	Major	Full	2018-12-11	ASM393902v1	North West Agriculture and Forestry University	GCA_003939025.1	identical	ftp://ftp.ncbi.nlm.nih.gov/genomes/all/GCF/003/939/025/GCF_003939025.1_ASM393902v1		assembly from type material	6665510	61.29	104	0.9905	1.0192	0.9814	1.0414	68	297932	9	87175	23	6394
GCF_003952725.1	PRJNA224116	SAMN10095205		representative genome	2341112	2341112	Georhizobium profundi	strain=WS11		latest	Complete Genome	Major	Full	2018-12-18	ASM395272v1	Shanghai Ocean University	GCA_003952725.1	identical	ftp://ftp.ncbi.nlm.nih.gov/genomes/all/GCF/003/952/725/GCF_003952725.1_ASM395272v1		assembly from type material	4356607	62.3	104	0.9905	1.0192	0.9814	1.017	1	4356607	1	4356607	1	4196
GCF_003966715.1	PRJNA224116	SAMD00131669		representative genome	2233851	2233851	Blastochloris tepida	strain=GI		latest	Complete Genome	Major	Full	2018-08-29	ASM396671v1	National Institute of Genetics	GCA_003966715.1	identical	ftp://ftp.ncbi.nlm.nih.gov/genomes/all/GCF/003/966/715/GCF_003966715.1_ASM396671v1		assembly from type material	3949390	68.3	104	0.9905	1	0.9814	1	1	3949390	1	3949390	1	3524
GCF_003970795.1	PRJNA224116	SAMN10531474	RWKW00000000.1	representative genome	2495581	2495581	Mesorhizobium carbonis	strain=B2.3		latest	Contig	Major	Full	2018-12-16	ASM397079v1	China University of Petroleum (East China)	GCA_003970795.1	identical	ftp://ftp.ncbi.nlm.nih.gov/genomes/all/GCF/003/970/795/GCF_003970795.1_ASM397079v1		assembly from type material	5345954	66.04	103	0.981	1.0194	0.9813	1.017	188	60530	26	14864	92	5087
GCF_003985125.1	PRJNA224116	SAMN10387098	RJJV00000000.1	na	396	396	Rhizobium phaseoli	strain=ATCC 14482		latest	Scaffold	Major	Full	2018-12-28	ASM398512v1	North West Agriculture and Forestry University	GCA_003985125.1	identical	ftp://ftp.ncbi.nlm.nih.gov/genomes/all/GCF/003/985/125/GCF_003985125.1_ASM398512v1		assembly from type material	6652103	61.36	104	0.9905	1.0288	0.9814	1.0617	80	270414	8	51124	30	6365
GCF_003985135.1	PRJNA224116	SAMN10386394	RJJU00000000.1	representative genome	573179	573179	Rhizobium fabae	strain=CCBAU 33202		latest	Scaffold	Major	Full	2018-12-28	ASM398513v1	North West Agriculture and Forestry University	GCA_003985135.1	identical	ftp://ftp.ncbi.nlm.nih.gov/genomes/all/GCF/003/985/135/GCF_003985135.1_ASM398513v1		assembly from type material	6611877	61.06	105	1	1.0381	1	1.0376	41	379018	7	133830	18	6408
GCF_003985145.1	PRJNA224116	SAMN10370526	RIBW00000000.1	representative genome	1184720	1184720	Rhizobium anhuiense	strain=CCBAU 23252		latest	Scaffold	Major	Full	2018-12-28	ASM398514v1	North West Agriculture and Forestry University	GCA_003985145.1	identical	ftp://ftp.ncbi.nlm.nih.gov/genomes/all/GCF/003/985/145/GCF_003985145.1_ASM398514v1		assembly from type material	7122203	61.13	103	0.981	1.0097	0.9813	1.0123	44	321130	6	100566	20	6709
GCF_003985155.1	PRJNA224116	SAMN10390720	RJTH00000000.1	representative genome	634290	634290	Rhizobium vallis	strain=CCBAU 65647		latest	Scaffold	Major	Full	2018-12-28	ASM398515v1	North West Agriculture and Forestry University	GCA_003985155.1	identical	ftp://ftp.ncbi.nlm.nih.gov/genomes/all/GCF/003/985/155/GCF_003985155.1_ASM398515v1		assembly from type material	7115113	60.77	104	0.9905	1.0385	0.9814	1.0657	62	440881	5	77642	17	6778
GCF_003992625.1	PRJNA224116	SAMN10659958	RZMW00000000.1	representative genome	2029865	2029865	Pelagibacterium lentulum	strain=B2		latest	Scaffold	Major	Full	2019-01-04	ASM399262v1	Second Institute of Oceanography. State Oceanic Administration	GCA_003992625.1	identical	ftp://ftp.ncbi.nlm.nih.gov/genomes/all/GCF/003/992/625/GCF_003992625.1_ASM399262v1		assembly from type material	4105996	57.67	104	0.9905	1.0096	0.9814	1.017	49	199196	7	41281	25	4093
GCF_003992665.1	PRJNA224116	SAMN10659957	RZMX00000000.1	representative genome	2185280	2185280	Pelagibacterium montanilacus	strain=CCL18		latest	Scaffold	Major	Full	2019-01-04	ASM399266v1	Second Institute of Oceanography. State Oceanic Administration	GCA_003992665.1	identical	ftp://ftp.ncbi.nlm.nih.gov/genomes/all/GCF/003/992/665/GCF_003992665.1_ASM399266v1		assembly from type material	3842394	64.12	105	1	1	1	1	59	185944	7	40824	21	3676
GCF_003993795.1	PRJNA224116	SAMN10537679	RWKV00000000.1	representative genome	2496029	2496029	Aquabacter cavernae	strain=Sn-9-2		latest	Scaffold	Major	Full	2019-01-04	ASM399379v1	State Key Laboratory for Conservation and Utilization of Bio-Resources in Yunnan	GCA_003993795.1	identical	ftp://ftp.ncbi.nlm.nih.gov/genomes/all/GCF/003/993/795/GCF_003993795.1_ASM399379v1		assembly from type material	4516483	67.49	104	0.9905	1.0096	0.9814	1.0224	19	512308	3	129084	8	3968
GCF_003994485.1	PRJNA224116	SAMN10662543	RZNJ00000000.1	representative genome	1783274	1783274	Arsenicitalea aurantiaca	strain=42-50		latest	Contig	Major	Full	2019-01-05	ASM399448v1	China University of Geosciences	GCA_003994485.1	identical	ftp://ftp.ncbi.nlm.nih.gov/genomes/all/GCF/003/994/485/GCF_003994485.1_ASM399448v1		assembly from type material	3686775	65.43	104	0.9905	1	0.9814	1	22	573327	3	150849	7	3544
GCF_004023665.1	PRJNA224116	SAMN10696590	SAUF00000000.1	representative genome	1909496	1909496	Afifella aestuarii	strain=JA968		latest	Contig	Major	Full	2019-01-15	ASM402366v1	JNTUH	GCA_004023665.1	identical	ftp://ftp.ncbi.nlm.nih.gov/genomes/all/GCF/004/023/665/GCF_004023665.1_ASM402366v1		assembly from type material	3918627	63.47	104	0.9905	1	0.9814	1	13	1220390	2	885564	3	3648
GCF_004103825.1	PRJNA224116	SAMN10618166	RYFI00000000.1	representative genome	405005	405005	Hansschlegelia zhihuaiae	strain=S 113		latest	Scaffold	Major	Full	2019-01-23	ASM410382v1	nanjing agricultural university	GCA_004103825.1	identical	ftp://ftp.ncbi.nlm.nih.gov/genomes/all/GCF/004/103/825/GCF_004103825.1_ASM410382v1		assembly from type material	4621517	68.21	104	0.9905	1.0192	0.9745	1.0322	61	189455	9	61154	25	4371
GCF_004114425.1	PRJNA224116	SAMN10259397	RDQF00000000.1	representative genome	1549949	1549949	Bradyrhizobium vignae	strain=LMG 28791		latest	Scaffold	Major	Full	2019-01-25	ASM411442v1	China Agricultural University	GCA_004114425.1	identical	ftp://ftp.ncbi.nlm.nih.gov/genomes/all/GCF/004/114/425/GCF_004114425.1_ASM411442v1		assembly from type material	8175609	63.21	104	0.9905	1.0288	0.9814	1.0383	156	130263	21	31992	73	7761
GCF_004114535.1	PRJNA224116	SAMN03459137	LBJC00000000.1	representative genome	1325118	1325118	Bradyrhizobium nanningense	strain=CCBAU 53390		latest	Scaffold	Major	Full	2019-01-25	ASM411453v1	China Agricultural University	GCA_004114535.1	identical	ftp://ftp.ncbi.nlm.nih.gov/genomes/all/GCF/004/114/535/GCF_004114535.1_ASM411453v1		assembly from type material	8290088	63.43	104	0.9905	1.0288	0.9814	1.033	82	296098	9	80114	28	7747
GCF_004114915.1	PRJNA224116	SAMN02418808		representative genome	1325115	1325115	Bradyrhizobium guangxiense	strain=CCBAU 53363		latest	Complete Genome	Major	Full	2019-01-28	ASM411491v1	China Agricultural University	GCA_004114915.1	identical	ftp://ftp.ncbi.nlm.nih.gov/genomes/all/GCF/004/114/915/GCF_004114915.1_ASM411491v1		assembly from type material	8200121	63.91	104	0.9905	1.0096	0.9814	1.0227	2	7220948	1	979173	2	7797
GCF_004114935.1	PRJNA224116	SAMN03459138		representative genome	1325107	1325107	Bradyrhizobium zhanjiangense	strain=CCBAU 51778		latest	Complete Genome	Major	Full	2019-01-28	ASM411493v1	China Agricultural University	GCA_004114935.1	identical	ftp://ftp.ncbi.nlm.nih.gov/genomes/all/GCF/004/114/935/GCF_004114935.1_ASM411493v1		assembly from type material	9342022	62.94	104	0.9905	1.0192	0.9814	1.0381	1	9342022	1	9342022	1	8858
GCF_004114955.1	PRJNA224116	SAMN03459144		representative genome	1325095	1325095	Bradyrhizobium guangzhouense	strain=CCBAU 51670		latest	Complete Genome	Major	Full	2019-01-28	ASM411495v1	China Agricultural University	GCA_004114955.1	identical	ftp://ftp.ncbi.nlm.nih.gov/genomes/all/GCF/004/114/955/GCF_004114955.1_ASM411495v1		assembly from type material	8138177	63.39	104	0.9905	1.0192	0.9814	1.0397	2	7158886	1	979291	2	7655
GCF_004114975.1	PRJNA224116	SAMN02415993		representative genome	1325090	1325090	Bradyrhizobium guangdongense	strain=CCBAU 51649		latest	Complete Genome	Major	Full	2019-01-28	ASM411497v1	China Agricultural University	GCA_004114975.1	identical	ftp://ftp.ncbi.nlm.nih.gov/genomes/all/GCF/004/114/975/GCF_004114975.1_ASM411497v1		assembly from type material	8437991	63.26	104	0.9905	1.0192	0.9814	1.0229	2	7456045	1	981946	2	8042
GCF_004135935.1	PRJNA224116	SAMN08095357		representative genome	569860	569860	Methylovirgula ligni	strain=BW863		latest	Complete Genome	Major	Full	2019-02-04	ASM413593v1	Chungbuk National University	GCA_004135935.1	identical	ftp://ftp.ncbi.nlm.nih.gov/genomes/all/GCF/004/135/935/GCF_004135935.1_ASM413593v1		assembly from type material	3298588	62.31	104	0.9905	1	0.9745	1	1	3298588	1	3298588	1	3186
GCF_004137085.1	PRJNA224116	SAMN09781800	QYBC00000000.1	representative genome	2316527	2316527	Lichenibacterium ramalinae	strain=RmlP001		latest	Scaffold	Major	Full	2019-02-04	ASM413708v1	Research Center of Biotechnology RAS	GCA_004137085.1	identical	ftp://ftp.ncbi.nlm.nih.gov/genomes/all/GCF/004/137/085/GCF_004137085.1_ASM413708v1		assembly from type material	5801291	70.8	105	1	1.0286	1	1.0344	76	216247	10	47490	28	5393
GCF_004137685.1	PRJNA224116	SAMN09781801	QYBB00000000.1	representative genome	2316528	2316528	Lichenibacterium minor	strain=RmlP026		latest	Contig	Major	Full	2019-02-05	ASM413768v1	Research Center of Biotechnology RAS	GCA_004137685.1	identical	ftp://ftp.ncbi.nlm.nih.gov/genomes/all/GCF/004/137/685/GCF_004137685.1_ASM413768v1		assembly from type material	5916175	70.51	105	1	1.0381	1	1.059	199	127675	14	21479	61	5678
GCF_004216635.1	PRJNA224116	SAMN10866394	SGWU00000000.1	na	1333996	1333996	Variibacter gotjawalensis	strain=DSM 29671		latest	Scaffold	Major	Full	2019-02-20	ASM421663v1	DOE Joint Genome Institute	GCA_004216635.1	identical	ftp://ftp.ncbi.nlm.nih.gov/genomes/all/GCF/004/216/635/GCF_004216635.1_ASM421663v1		assembly from type material	4586032	62.23	104	0.9905	1.0192	0.9814	1.0216	2	3920140	1	665892	2	4445
GCF_004216655.1	PRJNA224116	SAMN10864818	SGXB00000000.1	representative genome	28101	28101	Phyllobacterium myrsinacearum	strain=DSM 5893		latest	Scaffold	Major	Full	2019-02-20	ASM421665v1	DOE Joint Genome Institute	GCA_004216655.1	identical	ftp://ftp.ncbi.nlm.nih.gov/genomes/all/GCF/004/216/655/GCF_004216655.1_ASM421665v1		assembly from synonym type material	5590798	59.21	104	0.9905	1.0096	0.9814	1.0017	18	713135	3	320388	8	5353
GCF_004217385.1	PRJNA224116	SAMN10866329	SHLH00000000.1	na	28101	28101	Phyllobacterium myrsinacearum	strain=DSM 5892		latest	Scaffold	Major	Full	2019-02-20	ASM421738v1	DOE Joint Genome Institute	GCA_004217385.1	identical	ftp://ftp.ncbi.nlm.nih.gov/genomes/all/GCF/004/217/385/GCF_004217385.1_ASM421738v1		assembly from type material	5424106	59.32	104	0.9905	1.0096	0.9814	1.0017	17	1327176	2	302773	7	5179
GCF_004323635.1	PRJNA224116	SAMN10908461		na	2528642	2528642	Lichenihabitans psoromatis	strain=PAMC 29148		latest	Complete Genome	Major	Full	2019-03-04	ASM432363v1	KOREA POLAR RESEARCH INSTITUTE	GCA_004323635.1	identical	ftp://ftp.ncbi.nlm.nih.gov/genomes/all/GCF/004/323/635/GCF_004323635.1_ASM432363v1		assembly from type material	4836481	63.07	104	0.9905	1.0385	0.9998	1.0599	3	4645778	1	4645778	1	4576
GCF_004328075.1	PRJNA224116	SAMN10986326	SJFN00000000.1	representative genome	1549641	1549641	Siculibacillus lacustris	strain=SA-279		latest	Contig	Major	Full	2019-03-05	ASM432807v1	Eotvos Lorand University	GCA_004328075.1	identical	ftp://ftp.ncbi.nlm.nih.gov/genomes/all/GCF/004/328/075/GCF_004328075.1_ASM432807v1		assembly from type material	5020870	69.24	103	0.981	1.0291	0.9804	1.0373	99	120665	14	35372	44	4540
GCF_004331955.1	PRJNA224116	SAMN11037189		representative genome	1852022	1852022	Roseitalea porphyridii	strain=MA7-20		latest	Complete Genome	Major	Full	2019-03-07	ASM433195v1	Chung-Ang University	GCA_004331955.1	identical	ftp://ftp.ncbi.nlm.nih.gov/genomes/all/GCF/004/331/955/GCF_004331955.1_ASM433195v1		assembly from type material	3539672	66.56	104	0.9905	1	0.9814	1	1	3539672	1	3539672	1	3412
GCF_004339465.1	PRJNA224116	SAMN10866377	SMFY00000000.1	representative genome	100	100	Ancylobacter aquaticus	strain=DSM 101		latest	Contig	Major	Full	2019-03-11	ASM433946v1	DOE Joint Genome Institute	GCA_004339465.1	identical	ftp://ftp.ncbi.nlm.nih.gov/genomes/all/GCF/004/339/465/GCF_004339465.1_ASM433946v1		assembly from type material	4831989	67.02	104	0.9905	1	0.9814	1	11	1391578	2	281314	5	4432
GCF_004341645.1	PRJNA224116	SAMN10363400	SLZO00000000.1	na	83263	83263	Aminobacter aminovorans	strain=DSM 7048		latest	Scaffold	Major	Full	2019-03-11	ASM434164v1	DOE Joint Genome Institute	GCA_004341645.1	identical	ftp://ftp.ncbi.nlm.nih.gov/genomes/all/GCF/004/341/645/GCF_004341645.1_ASM434164v1		assembly from type material	5848363	63.19	104	0.9905	1.0192	0.9814	1.026	29	467483	5	105341	14	5668
GCF_004341885.1	PRJNA224116	SAMN10866395	SLVX00000000.1	representative genome	323621	323621	Shinella granuli	strain=DSM 18401		latest	Scaffold	Major	Full	2019-03-11	ASM434188v1	DOE Joint Genome Institute	GCA_004341885.1	identical	ftp://ftp.ncbi.nlm.nih.gov/genomes/all/GCF/004/341/885/GCF_004341885.1_ASM434188v1		assembly from type material	6590828	65.03	104	0.9905	1.0192	0.9998	1.0376	97	209456	9	40188	32	6317
GCF_004342915.1	PRJNA224116	SAMN10866396	SLWL00000000.1	representative genome	659006	659006	Camelimonas lactis	strain=DSM 22958		latest	Contig	Major	Full	2019-03-11	ASM434291v1	DOE Joint Genome Institute	GCA_004342915.1	identical	ftp://ftp.ncbi.nlm.nih.gov/genomes/all/GCF/004/342/915/GCF_004342915.1_ASM434291v1		assembly from type material	4176633	66.29	104	0.9905	1.0096	0.9814	1.0239	53	207571	6	57463	19	3618
GCF_004346185.1	PRJNA224116	SAMN10362896	SMAI00000000.1	representative genome	933073	933073	Aquabacter spiritensis	strain=DSM 9035		latest	Scaffold	Major	Full	2019-03-11	ASM434618v1	DOE Joint Genome Institute	GCA_004346185.1	identical	ftp://ftp.ncbi.nlm.nih.gov/genomes/all/GCF/004/346/185/GCF_004346185.1_ASM434618v1		assembly from type material	5162879	67.56	104	0.9905	1.0096	0.9814	1.017	52	274730	6	108176	18	4645
GCF_004346195.1	PRJNA224116	SAMN10363316	SMAK00000000.1	representative genome	747076	747076	Tepidamorphus gemmatus	strain=DSM 19345		latest	Scaffold	Major	Full	2019-03-11	ASM434619v1	DOE Joint Genome Institute	GCA_004346195.1	identical	ftp://ftp.ncbi.nlm.nih.gov/genomes/all/GCF/004/346/195/GCF_004346195.1_ASM434619v1		assembly from type material	3781903	67.59	104	0.9905	1.0096	0.9814	1.0008	32	380665	4	75366	13	3564
GCF_004348265.1	PRJNA224116	SAMN11087661	SMNT00000000.1	representative genome	2488750	2488750	Methylobacterium segetis	strain=17J42-1		latest	Contig	Major	Full	2019-03-13	ASM434826v1	College of Agriculture and Life Sciences. Kyungpook National University	GCA_004348265.1	identical	ftp://ftp.ncbi.nlm.nih.gov/genomes/all/GCF/004/348/265/GCF_004348265.1_ASM434826v1		assembly from type material	5591199	70.18	104	0.9905	1.0192	0.9745	1.0458	256	42399	43	11699	133	5437
GCF_004354915.1	PRJNA224116	SAMN11102717	SMSI00000000.1	representative genome	877384	877384	Pseudohoeflea suaedae	strain=YC6898		latest	Contig	Major	Full	2019-03-18	ASM435491v1	Chung-Ang University	GCA_004354915.1	identical	ftp://ftp.ncbi.nlm.nih.gov/genomes/all/GCF/004/354/915/GCF_004354915.1_ASM435491v1		assembly from type material	3772164	62.54	103	0.981	1.0194	0.9813	1.0362	21	2102496	1	363614	4	3525
GCF_004358025.1	PRJNA224116	SAMN11109654	SMTL00000000.1	representative genome	2547961	2547961	Rhizobium deserti	strain=SPY-1		latest	Contig	Major	Full	2019-03-19	ASM435802v1	Chinese Academy of Forestry	GCA_004358025.1	identical	ftp://ftp.ncbi.nlm.nih.gov/genomes/all/GCF/004/358/025/GCF_004358025.1_ASM435802v1		assembly from type material	4747674	59.96	102	0.9714	1.0294	0.972	1.0569	29	1157938	2	220106	7	4591
GCF_004362745.1	PRJNA224116	SAMN10362898	SNXY00000000.1	representative genome	1920512	1920512	Oharaeibacter diazotrophicus	strain=DSM 102969		latest	Contig	Major	Full	2019-03-22	ASM436274v1	DOE Joint Genome Institute	GCA_004362745.1	identical	ftp://ftp.ncbi.nlm.nih.gov/genomes/all/GCF/004/362/745/GCF_004362745.1_ASM436274v1		assembly from type material	4991892	71.61	104	0.9905	1	0.9814	1	14	810054	2	230511	6	4507
GCF_004363175.1	PRJNA224116	SAMN04488141	SNYR00000000.1	representative genome	483324	483324	Maritalea mobilis	strain=CGMCC 1.7002		latest	Scaffold	Major	Full	2019-03-22	ASM436317v1	DOE Joint Genome Institute	GCA_004363175.1	identical	ftp://ftp.ncbi.nlm.nih.gov/genomes/all/GCF/004/363/175/GCF_004363175.1_ASM436317v1		assembly from type material	3467317	51.36	105	1	1.019	1	1.0298	7	968542	2	712641	3	3388
GCF_004363725.1	PRJNA224116	SAMN09064520	SNZF00000000.1	representative genome	69279	69279	Aquamicrobium defluvii	strain=DSM 11603		latest	Scaffold	Major	Full	2019-03-22	ASM436372v1	DOE Joint Genome Institute	GCA_004363725.1	identical	ftp://ftp.ncbi.nlm.nih.gov/genomes/all/GCF/004/363/725/GCF_004363725.1_ASM436372v1		assembly from type material	4522399	63.14	104	0.9905	1.0096	0.9814	1.017	91	132816	12	33066	38	4423
GCF_004363955.1	PRJNA224116	SAMN10866397	SNZR00000000.1	representative genome	1339210	1339210	Enterovirga rhinocerotis	strain=DSM 25903		latest	Contig	Major	Full	2019-03-22	ASM436395v1	DOE Joint Genome Institute	GCA_004363955.1	identical	ftp://ftp.ncbi.nlm.nih.gov/genomes/all/GCF/004/363/955/GCF_004363955.1_ASM436395v1		assembly from type material	5166770	68.54	105	1	1	1	1	20	1032375	2	245878	6	4874
GCF_004365425.1	PRJNA224116	SAMN10864780	SODG00000000.1	representative genome	1136135	1136135	Rhizobium azibense	strain=23C2		latest	Scaffold	Major	Full	2019-03-22	ASM436542v1	DOE Joint Genome Institute	GCA_004365425.1	identical	ftp://ftp.ncbi.nlm.nih.gov/genomes/all/GCF/004/365/425/GCF_004365425.1_ASM436542v1		assembly from type material	7371895	59.53	105	1	1.0381	1	1.0548	54	287997	10	90166	29	7217
GCF_004458765.1	PRJNA224116	SAMN11254547	SPJX00000000.1	representative genome	1682650	1682650	Microvirga pakistanensis	strain=NCCP-1258		latest	Contig	Major	Full	2019-03-27	ASM445876v1	Southwest Forestry University	GCA_004458765.1	identical	ftp://ftp.ncbi.nlm.nih.gov/genomes/all/GCF/004/458/765/GCF_004458765.1_ASM445876v1		assembly from type material	5764046	63.29	105	1	1.0857	1	1.0847	723	239978	9	37356	31	5930
GCF_004519335.1	PRJNA224116	SAMN11174978	SOZD00000000.1	representative genome	2558362	2558362	Jiella endophytica	strain=CBS5Q-3		latest	Contig	Major	Full	2019-03-27	ASM451933v1	Research Center for Medicine & Biology	GCA_004519335.1	identical	ftp://ftp.ncbi.nlm.nih.gov/genomes/all/GCF/004/519/335/GCF_004519335.1_ASM451933v1		assembly from type material	5252418	66.51	104	0.9905	1.2115	0.9814	1.0406	28	669366	3	85583	9	4795
GCF_004801285.1	PRJNA224116	SAMN11382006	SSNY00000000.1	representative genome	2675109	2675109	Mesorhizobium composti	strain=CC-YTH430		latest	Contig	Major	Full	2019-04-20	ASM480128v1	Nation Chung Hsing University	GCA_004801285.1	identical	ftp://ftp.ncbi.nlm.nih.gov/genomes/all/GCF/004/801/285/GCF_004801285.1_ASM480128v1		assembly from type material	4653540	65.18	104	0.9905	1.0288	0.9814	1.0517	36	314054	5	91962	14	4432
GCF_004802635.2	PRJNA224116	SAMN11168656		representative genome	391905	391905	Methylocystis heyeri	strain=H2		latest	Complete Genome	Major	Full	2019-11-20	ASM480263v2	Federal Research Centre Fundamentals of Biotechnology of RAS	GCA_004802635.2	identical	ftp://ftp.ncbi.nlm.nih.gov/genomes/all/GCF/004/802/635/GCF_004802635.2_ASM480263v2		assembly from type material	4727788	63.02	103	0.981	1.0194	0.9743	1.036	3	4551947	1	4551947	1	4261
GCF_004912135.1	PRJNA224116	SAMN11458655	STGU00000000.1	representative genome	538378	1368430	Rhizobium rosettiformans W3	strain=W3		latest	Contig	Major	Full	2019-04-24	ASM491213v1	Beijing Academy of Agriculture and Forestry Science	GCA_004912135.1	identical	ftp://ftp.ncbi.nlm.nih.gov/genomes/all/GCF/004/912/135/GCF_004912135.1_ASM491213v1		assembly from type material	4977406	61.64	104	0.9905	1.0385	0.9998	1.0189	86	288344	6	46371	20	4884
GCF_004912165.1	PRJNA224116	SAMN11458668	STGV00000000.1	representative genome	1210932	1210932	Rhizobium ipomoeae	strain=shin9-1		latest	Contig	Major	Full	2019-04-24	ASM491216v1	Beijing Academy of Agriculture and Forestry Science	GCA_004912165.1	identical	ftp://ftp.ncbi.nlm.nih.gov/genomes/all/GCF/004/912/165/GCF_004912165.1_ASM491216v1		assembly from type material	4385529	60.4	105	1	1.0095	1	1.0121	23	545072	3	256943	7	4177
GCF_005145045.1	PRJNA224116	SAMN11489445		representative genome	160699	160699	Agrobacterium larrymoorei	strain=CFBP5473		latest	Complete Genome	Major	Full	2019-05-05	ASM514504v1	Academia Sinica	GCA_005145045.1	identical	ftp://ftp.ncbi.nlm.nih.gov/genomes/all/GCF/005/145/045/GCF_005145045.1_ASM514504v1		assembly from type material	5259126	57.2	105	1	1	1	1	4	2968843	1	404101	3	4935
GCF_005871085.1	PRJNA224116	SAMN11493719	VAUP00000000.1	na	280	280	Xanthobacter autotrophicus	strain=DSM 432		latest	Scaffold	Major	Full	2019-05-28	ASM587108v1	State Key Laboratory for Conservation and Utilization of Bio-Resources in Yunnan	GCA_005871085.1	identical	ftp://ftp.ncbi.nlm.nih.gov/genomes/all/GCF/005/871/085/GCF_005871085.1_ASM587108v1		assembly from type material	5013287	67.55	104	0.9905	1.0192	0.9814	1.0409	42	381522	5	114038	14	4493
GCF_005924265.1	PRJNA224116	SAMN11835397	VCLB00000000.1	representative genome	2583532	2583532	Martelella lutilitoris	strain=GH2-6		latest	Contig	Major	Full	2019-06-03	ASM592426v1	BioPS Co.. Ltd.	GCA_005924265.1	identical	ftp://ftp.ncbi.nlm.nih.gov/genomes/all/GCF/005/924/265/GCF_005924265.1_ASM592426v1		assembly from type material	4447501	61.96	103	0.981	1.0194	0.9732	1.0485	18	402005	5	243178	10	4029
GCF_005938105.1	PRJNA224116	SAMN11855631	VCPE00000000.1	na	419474	419474	Ochrobactrum haematophilum	strain=CCUG 38531		latest	Contig	Major	Full	2019-06-03	ASM593810v1	Hankyong National University	GCA_005938105.1	identical	ftp://ftp.ncbi.nlm.nih.gov/genomes/all/GCF/005/938/105/GCF_005938105.1_ASM593810v1		assembly from type material	5503262	56.67	104	0.9905	1.0096	0.9814	1.0134	55	276154	7	78121	20	5202
GCF_006335145.1	PRJNA224116	SAMN11959953	VDMN00000000.1	representative genome	1395944	1395944	Rhizobium smilacinae	strain=PTYR-5		latest	Contig	Major	Full	2019-06-12	ASM633514v1	Chinese Academy of Forestry	GCA_006335145.1	identical	ftp://ftp.ncbi.nlm.nih.gov/genomes/all/GCF/006/335/145/GCF_006335145.1_ASM633514v1		assembly from type material	6006051	59	105	1	1.0286	1	1.0551	29	864686	2	207448	8	5701
GCF_006376675.1	PRJNA224116	SAMN11998268	VEWK00000000.1	representative genome	867683	867683	Ochrobactrum pecoris	strain=08RB2639		latest	Contig	Major	Full	2019-06-16	ASM637667v1	Sichuan University	GCA_006376675.1	identical	ftp://ftp.ncbi.nlm.nih.gov/genomes/all/GCF/006/376/675/GCF_006376675.1_ASM637667v1		assembly from type material	5057340	55.94	104	0.9905	1.0192	0.9814	1.0362	61	283806	5	69482	16	4891
GCF_006443685.1	PRJNA224116	SAMN12058266	VFYP00000000.1	representative genome	2589807	2589807	Rhizobium glycinendophyticum	strain=CL12		latest	Contig	Major	Full	2019-06-24	ASM644368v1	guangdong institute of microbiology	GCA_006443685.1	identical	ftp://ftp.ncbi.nlm.nih.gov/genomes/all/GCF/006/443/685/GCF_006443685.1_ASM644368v1		assembly from type material	4843317	61.09	104	0.9905	1.0096	0.9998	1.0255	16	2995531	1	166916	5	4630
GCF_006476605.1	PRJNA224116	SAMN11998090	VEWJ00000000.1	representative genome	215590	215590	Ochrobactrum gallinifaecis	strain=ISO 196		latest	Scaffold	Major	Full	2019-06-24	ASM647660v1	Sichuan University	GCA_006476605.1	identical	ftp://ftp.ncbi.nlm.nih.gov/genomes/all/GCF/006/476/605/GCF_006476605.1_ASM647660v1		assembly from type material	3742416	50.97	104	0.9905	1.0096	0.9814	1.0123	37	373399	5	53381	15	3503
GCF_006539605.1	PRJNA224116	SAMD00097544	BJNI00000000.1	na	380	380	Sinorhizobium fredii	strain=NBRC 14780		latest	Contig	Major	Full	2019-06-12	ASM653960v1	National Institute of Technology and Evaluation	GCA_006539605.1	identical	ftp://ftp.ncbi.nlm.nih.gov/genomes/all/GCF/006/539/605/GCF_006539605.1_ASM653960v1		assembly from type material	6563371	62.32	103	0.981	1.0097	0.9813	1.0123	276	58055	32	15702	119	6210
GCF_006539645.1	PRJNA224116	SAMD00097546	BJNK00000000.1	na	375	375	Bradyrhizobium japonicum	strain=NBRC 14783		latest	Contig	Major	Full	2019-06-12	ASM653964v1	National Institute of Technology and Evaluation	GCA_006539645.1	identical	ftp://ftp.ncbi.nlm.nih.gov/genomes/all/GCF/006/539/645/GCF_006539645.1_ASM653964v1		assembly from type material	9096562	63.69	104	0.9905	1.0096	0.9814	1.0227	177	168333	15	37185	60	8607
GCF_006539665.1	PRJNA224116	SAMD00097547	BJNL00000000.1	na	29448	29448	Bradyrhizobium elkanii	strain=NBRC 14791		latest	Contig	Major	Full	2019-06-12	ASM653966v1	National Institute of Technology and Evaluation	GCA_006539665.1	identical	ftp://ftp.ncbi.nlm.nih.gov/genomes/all/GCF/006/539/665/GCF_006539665.1_ASM653966v1		assembly from type material	9260234	63.74	103	0.981	1.0291	0.9813	1.0539	289	107583	26	21151	102	8819
GCF_007002985.1	PRJNA224116	SAMN10888982	SGOG00000000.1	na	359	359	Agrobacterium rhizogenes	strain=LMG150		latest	Contig	Major	Full	2019-07-15	ASM700298v1	Institute for Agricultural and Fisheries and Food Research (ILVO)	GCA_007002985.1	identical	ftp://ftp.ncbi.nlm.nih.gov/genomes/all/GCF/007/002/985/GCF_007002985.1_ASM700298v1		assembly from type material	7054120	59.91	105	1	1.0667	1	1.0582	72	423091	7	114024	18	6625
GCF_007474605.1	PRJNA224116	SAMN12123267	VHKL00000000.1	representative genome	987056	987056	Rhodoligotrophos appendicifer	strain=120-1		latest	Contig	Major	Full	2019-07-25	ASM747460v1	University of Jinan	GCA_007474605.1	identical	ftp://ftp.ncbi.nlm.nih.gov/genomes/all/GCF/007/474/605/GCF_007474605.1_ASM747460v1		assembly from type material	5593515	61.1	102	0.9714	1.0196	0.9495	1.0503	33	478873	5	82717	13	5252
GCF_007827505.1	PRJNA224116	SAMN05421918	VISO00000000.1	representative genome	1079460	57676	Rhizobium mongolense USDA 1844	strain=USDA 1844		latest	Contig	Major	Full	2019-08-02	ASM782750v1	DOE Joint Genome Institute	GCA_007827505.1	identical	ftp://ftp.ncbi.nlm.nih.gov/genomes/all/GCF/007/827/505/GCF_007827505.1_ASM782750v1		assembly from type material	7295545	59.5	105	1	1.0286	1	1.0338	3	4253754	1	834182	3	7151
GCF_007827695.1	PRJNA224116	SAMN11512017	VITA00000000.1	na	110321	110321	Sinorhizobium medicae	strain=USDA1037		latest	Scaffold	Major	Full	2019-08-02	ASM782769v1	DOE Joint Genome Institute	GCA_007827695.1	identical	ftp://ftp.ncbi.nlm.nih.gov/genomes/all/GCF/007/827/695/GCF_007827695.1_ASM782769v1		assembly from type material	6534206	61.16	103	0.981	1.0291	0.9813	1.0597	68	242490	8	57734	26	6304
GCF_007830205.1	PRJNA224116	SAMN02927912	VLKL00000000.1	representative genome	993502	993502	Bradyrhizobium daqingense	strain=CGMCC 1.10947		latest	Scaffold	Major	Full	2019-08-02	ASM783020v1	DOE Joint Genome Institute	GCA_007830205.1	identical	ftp://ftp.ncbi.nlm.nih.gov/genomes/all/GCF/007/830/205/GCF_007830205.1_ASM783020v1		assembly from type material	7889191	63.72	104	0.9905	1.0096	0.9814	1.0227	107	276349	10	38665	37	7535
GCF_007830635.1	PRJNA224116	SAMN02927902	VLLA00000000.1	representative genome	990078	990078	Bradyrhizobium huanghuaihaiense	strain=CGMCC 1.10948		latest	Scaffold	Major	Full	2019-08-02	ASM783063v1	DOE Joint Genome Institute	GCA_007830635.1	identical	ftp://ftp.ncbi.nlm.nih.gov/genomes/all/GCF/007/830/635/GCF_007830635.1_ASM783063v1		assembly from type material	9226856	63.92	104	0.9905	1.0385	0.9814	1.0468	101	244862	11	51010	38	8715
GCF_007859655.1	PRJNA224116	SAMN12358552		representative genome	400770	400770	Devosia ginsengisoli	strain=Gsoil 520		latest	Complete Genome	Major	Full	2019-08-07	ASM785965v1	Hankyong National University	GCA_007859655.1	identical	ftp://ftp.ncbi.nlm.nih.gov/genomes/all/GCF/007/859/655/GCF_007859655.1_ASM785965v1		assembly from type material	4480314	63.66	104	0.9905	1.0096	0.9814	1.026	1	4480314	1	4480314	1	4396
GCF_007991055.1	PRJNA224116	SAMD00169741	BJXP00000000.1	na	31998	31998	Methylobacterium radiotolerans	strain=NBRC 15690		latest	Contig	Major	Full	2019-07-31	ASM799105v1	National Institute of Technology and Evaluation	GCA_007991055.1	identical	ftp://ftp.ncbi.nlm.nih.gov/genomes/all/GCF/007/991/055/GCF_007991055.1_ASM799105v1		assembly from type material	6791170	71.1	103	0.981	1.0097	0.9743	1.0228	170	101294	22	25555	76	6508
GCF_007991675.1	PRJNA224116	SAMD00171867	BJYU00000000.1	na	670291	670291	Microvirga aerophila	strain=NBRC 106136		latest	Contig	Major	Full	2019-07-31	ASM799167v1	National Institute of Technology and Evaluation Biological Resource Center	GCA_007991675.1	identical	ftp://ftp.ncbi.nlm.nih.gov/genomes/all/GCF/007/991/675/GCF_007991675.1_ASM799167v1		assembly from type material	7363484	61.62	105	1	1.0571	1	1.044	629	43211	42	5031	233	7778
GCF_007992095.1	PRJNA224116	SAMD00172651	BJZP00000000.1	representative genome	1118451	1118451	Rhizobium naphthalenivorans	strain=NBRC 107585		latest	Contig	Major	Full	2019-07-31	ASM799209v1	National Institute of Technology and Evaluation Biological Resource Center	GCA_007992095.1	identical	ftp://ftp.ncbi.nlm.nih.gov/genomes/all/GCF/007/992/095/GCF_007992095.1_ASM799209v1		assembly from type material	4956527	61.15	104	0.9905	1	0.9998	1	139	151263	10	32811	33	4716
GCF_007992175.1	PRJNA224116	SAMD00172656	BJZT00000000.1	representative genome	1176176	1176176	Methylobacterium haplocladii	strain=NBRC 107714		latest	Contig	Major	Full	2019-07-31	ASM799217v1	National Institute of Technology and Evaluation Biological Resource Center	GCA_007992175.1	identical	ftp://ftp.ncbi.nlm.nih.gov/genomes/all/GCF/007/992/175/GCF_007992175.1_ASM799217v1		assembly from type material	4636856	67.57	103	0.981	1	0.9743	1	104	103530	17	41481	43	4390
GCF_007992195.1	PRJNA224116	SAMD00172657	BJZU00000000.1	representative genome	944322	944322	Methylobacterium oxalidis	strain=NBRC 107715		latest	Contig	Major	Full	2019-07-31	ASM799219v1	National Institute of Technology and Evaluation Biological Resource Center	GCA_007992195.1	identical	ftp://ftp.ncbi.nlm.nih.gov/genomes/all/GCF/007/992/195/GCF_007992195.1_ASM799219v1		assembly from type material	6288989	69.96	103	0.981	1.0097	0.9743	1.0228	343	50037	36	9274	145	6212
GCF_007992215.1	PRJNA224116	SAMD00172658	BJZV00000000.1	representative genome	1010610	1010610	Methylobacterium gnaphalii	strain=NBRC 107716		latest	Contig	Major	Full	2019-07-31	ASM799221v1	National Institute of Technology and Evaluation Biological Resource Center	GCA_007992215.1	identical	ftp://ftp.ncbi.nlm.nih.gov/genomes/all/GCF/007/992/215/GCF_007992215.1_ASM799221v1		assembly from type material	4778267	65.97	103	0.981	1.0194	0.9743	1.0469	120	165443	10	21020	37	4736
GCF_008000755.1	PRJNA224116	SAMN12233448		representative genome	1447062	1447062	Youhaiella tibetensis	strain=fig4		latest	Complete Genome	Major	Full	2019-08-16	ASM800075v1	Academy of National Food and Strategic Reserves Administration	GCA_008000755.1	identical	ftp://ftp.ncbi.nlm.nih.gov/genomes/all/GCF/008/000/755/GCF_008000755.1_ASM800075v1		assembly from type material	4430734	64.8	104	0.9905	1.0192	0.9814	1.0442	1	4430734	1	4430734	1	4322
GCF_008123425.1	PRJNA224116	SAMN12600330	VSSS00000000.1	representative genome	515499	515499	Bradyrhizobium rifense	strain=CTAW71		latest	Scaffold	Major	Full	2019-08-28	ASM812342v1	LMU Munich	GCA_008123425.1	identical	ftp://ftp.ncbi.nlm.nih.gov/genomes/all/GCF/008/123/425/GCF_008123425.1_ASM812342v1		assembly from type material	9952932	63.02	104	0.9905	1.0288	0.9814	1.0608	140	152866	22	50042	68	9506
GCF_008123515.1	PRJNA224116	SAMN12600325	VSSR00000000.1	representative genome	515489	515489	Bradyrhizobium cytisi	strain=CTAW11		latest	Contig	Major	Full	2019-08-28	ASM812351v1	LMU Munich	GCA_008123515.1	identical	ftp://ftp.ncbi.nlm.nih.gov/genomes/all/GCF/008/123/515/GCF_008123515.1_ASM812351v1		assembly from type material	8854489	63.16	104	0.9905	1.0385	0.9814	1.0896	186	126158	22	35919	69	8451
GCF_008180215.1	PRJNA224116	SAMN12634823	VSZT00000000.1	na	1149773	1149773	Phyllobacterium endophyticum	strain=PEPV15		latest	Scaffold	Major	Full	2019-08-31	ASM818021v1	Universidad de Salamanca	GCA_008180215.1	identical	ftp://ftp.ncbi.nlm.nih.gov/genomes/all/GCF/008/180/215/GCF_008180215.1_ASM818021v1		assembly from type material	5505652	56.99	104	0.9905	1.0096	0.9814	1.0214	15	1026827	2	222495	7	5333
GCF_008630065.1	PRJNA224116	SAMN12713635	VWPL00000000.1	representative genome	50712	50712	Blastochloris sulfoviridis	strain=DSM 729		latest	Contig	Major	Full	2019-09-20	ASM863006v1	Bellevue University	GCA_008630065.1	identical	ftp://ftp.ncbi.nlm.nih.gov/genomes/all/GCF/008/630/065/GCF_008630065.1_ASM863006v1		assembly from type material	3845334	68.13	104	0.9905	1	0.9814	1	91	108240	12	28377	40	3374
GCF_008641065.1	PRJNA224116	SAMN12587484	VTRS00000000.1	na	2604328	2604328	Rhabdaerophilum calidifontis	strain=SYSU G02060		latest	Contig	Major	Full	2019-09-23	ASM864106v1	Sun Yat-sen University	GCA_008641065.1	identical	ftp://ftp.ncbi.nlm.nih.gov/genomes/all/GCF/008/641/065/GCF_008641065.1_ASM864106v1		assembly from type material	3086309	68.26	104	0.9905	1	0.9814	1	19	379575	3	116601	9	2868
GCF_008757455.1	PRJNA224116	SAMN11658404	VCMV00000000.1	representative genome	2580413	2580413	Microvirga brassicacearum	strain=CDVBN77		latest	Scaffold	Major	Full	2019-09-30	ASM875745v1	University of Salamanca	GCA_008757455.1	identical	ftp://ftp.ncbi.nlm.nih.gov/genomes/all/GCF/008/757/455/GCF_008757455.1_ASM875745v1		assembly from type material	5220401	62.26	104	0.9905	1.0096	0.9807	1.0239	82	150733	10	37377	37	5001
GCF_008801385.1	PRJNA224116	SAMN12697597	VZPW00000000.1	na	358	358	Agrobacterium tumefaciens	strain=CCUG 3354		latest	Contig	Major	Full	2019-10-01	ASM880138v1	University of Gothenburg - CCUG	GCA_008801385.1	identical	ftp://ftp.ncbi.nlm.nih.gov/genomes/all/GCF/008/801/385/GCF_008801385.1_ASM880138v1		assembly from synonym type material	5500217	59.35	105	1	1	1	1	27	480729	4	194884	10	5233
GCF_008801705.1	PRJNA224116	SAMN12697579	VZPE00000000.1	na	571256	571256	Ochrobactrum pituitosum	strain=CCUG 50899		latest	Contig	Major	Full	2019-10-01	ASM880170v1	University of Gothenburg - CCUG	GCA_008801705.1	identical	ftp://ftp.ncbi.nlm.nih.gov/genomes/all/GCF/008/801/705/GCF_008801705.1_ASM880170v1		assembly from type material	5170436	53.45	104	0.9905	1.0865	0.9814	1.0847	60	382153	5	93161	14	4995
GCF_008801715.1	PRJNA224116	SAMN12697581	VZPG00000000.1	representative genome	354352	354352	Pseudochrobactrum saccharolyticum	strain=CCUG 33852		latest	Contig	Major	Full	2019-10-01	ASM880171v1	University of Gothenburg - CCUG	GCA_008801715.1	identical	ftp://ftp.ncbi.nlm.nih.gov/genomes/all/GCF/008/801/715/GCF_008801715.1_ASM880171v1		assembly from type material	3762651	51.45	104	0.9905	1	0.9814	1	12	748633	2	303037	5	3378
GCF_008802405.1	PRJNA224116	SAMN12817691	VZDO00000000.1	representative genome	2615207	2615207	Aureimonas leprariae	strain=YIM 132180		latest	Contig	Major	Full	2019-10-01	ASM880240v1	Yunnan Institute of Microbiology	GCA_008802405.1	identical	ftp://ftp.ncbi.nlm.nih.gov/genomes/all/GCF/008/802/405/GCF_008802405.1_ASM880240v1		assembly from type material	4779519	68.42	104	0.9905	1.0192	0.9814	1.0486	40	213101	7	69251	22	4625
GCF_008806385.1	PRJNA224116	SAMN12818495	VZZK00000000.1	representative genome	553447	553447	Methylobacterium soli	strain=YIM 48816		latest	Scaffold	Major	Full	2019-10-02	ASM880638v1	Yunnan University	GCA_008806385.1	identical	ftp://ftp.ncbi.nlm.nih.gov/genomes/all/GCF/008/806/385/GCF_008806385.1_ASM880638v1		assembly from type material	6648145	68.53	103	0.981	1.0583	0.9743	1.0829	111	134260	15	30339	51	6469
GCF_008932115.1	PRJNA224116	SAMN12900461		representative genome	244734	244734	Bradyrhizobium betae	strain=PL7HG1		latest	Complete Genome	Major	Full	2019-10-09	ASM893211v1	Agriculture and Agri-Food Canada	GCA_008932115.1	identical	ftp://ftp.ncbi.nlm.nih.gov/genomes/all/GCF/008/932/115/GCF_008932115.1_ASM893211v1		assembly from type material	7419402	64.36	103	0.981	1.0194	0.9813	1.0538	2	7150095	1	7150095	1	7104
GCF_008932245.1	PRJNA224116	SAMN10600730		representative genome	1752398	1752398	Ensifer alkalisoli	strain=YIC4027		latest	Complete Genome	Major	Full	2019-10-09	ASM893224v1	Yantai Institute of Coastal Zone Research. Chinese Academy of Sciences Beijing	GCA_008932245.1	identical	ftp://ftp.ncbi.nlm.nih.gov/genomes/all/GCF/008/932/245/GCF_008932245.1_ASM893224v1		assembly from type material	6128433	62.24	104	0.9905	1.0096	0.9814	1.026	3	3690234	1	1981775	2	5743
GCF_008932295.1	PRJNA224116	SAMN12821298	WBWA00000000.1	representative genome	94626	94626	Ochrobactrum tritici	strain=LMG 18957		latest	Contig	Major	Full	2019-10-09	ASM893229v1	INRA - Institut National de la Recherche Agronomique	GCA_008932295.1	identical	ftp://ftp.ncbi.nlm.nih.gov/genomes/all/GCF/008/932/295/GCF_008932295.1_ASM893229v1		assembly from type material	5203002	55.9	104	0.9905	1.0192	0.9814	1.0362	153	142456	10	51590	34	5181
GCF_009498475.1	PRJNA224116	SAMN09762216	QSNU00000000.1	na	358	358	Agrobacterium tumefaciens	strain=ICMP 5856T		latest	Scaffold	Major	Full	2019-10-29	ASM949847v1	The New Zealand Institute for Plant and Food Research Ltd	GCA_009498475.1	identical	ftp://ftp.ncbi.nlm.nih.gov/genomes/all/GCF/009/498/475/GCF_009498475.1_ASM949847v1		assembly from type material	5817773	59.22	105	1	1	1	1	47	270595	6	102670	18	5556
GCF_009599935.1	PRJNA224116	SAMN00766392	WIRH00000000.1	na	110321	110321	Sinorhizobium medicae	strain=A321		latest	Scaffold	Major	Full	2019-11-05	ASM959993v1	Medicago Hapmap Project	GCA_009599935.1	identical	ftp://ftp.ncbi.nlm.nih.gov/genomes/all/GCF/009/599/935/GCF_009599935.1_ASM959993v1		assembly from type material	7161183	60.97	103	0.981	1.0291	0.9813	1.0597	221	155931	14	16207	63	7021
GCF_009601385.1	PRJNA224116	SAMN00766436	WISX00000000.1	na	382	382	Sinorhizobium meliloti	strain=USDA1002		latest	Scaffold	Major	Full	2019-11-05	ASM960138v1	Medicago Hapmap Project	GCA_009601385.1	identical	ftp://ftp.ncbi.nlm.nih.gov/genomes/all/GCF/009/601/385/GCF_009601385.1_ASM960138v1		assembly from type material	7532486	61.98	104	0.9905	1.0288	0.9998	1.0611	359	51743	43	10148	162	7448
GCF_009601405.1	PRJNA224116	SAMN00766438	WISZ00000000.1	na	380	380	Sinorhizobium fredii	strain=USDA205		latest	Contig	Major	Full	2019-11-05	ASM960140v1	Medicago Hapmap Project	GCA_009601405.1	identical	ftp://ftp.ncbi.nlm.nih.gov/genomes/all/GCF/009/601/405/GCF_009601405.1_ASM960140v1		assembly from type material	7152016	62.15	103	0.981	1.0097	0.9813	1.0123	255	74219	28	13721	110	6823
GCF_009720755.1	PRJNA224116	SAMN13286682	WNKV00000000.1	representative genome	200615	200615	Rhodoplanes serenus	strain=DSM 18633		latest	Contig	Major	Full	2019-11-30	ASM972075v1	Bellevue University	GCA_009720755.1	identical	ftp://ftp.ncbi.nlm.nih.gov/genomes/all/GCF/009/720/755/GCF_009720755.1_ASM972075v1		assembly from type material	5501108	70.27	104	0.9905	1.0096	0.9814	1.0008	51	262047	8	101277	22	4986
GCF_009811675.1	PRJNA224116	SAMD00116537	BGJY00000000.1	na	428	428	Methylosinus sporium	strain=DSM 17706		latest	Contig	Major	Full	2019-12-11	ASM981167v1	National Institute of Advanced Industrial Science and Technology	GCA_009811675.1	identical	ftp://ftp.ncbi.nlm.nih.gov/genomes/all/GCF/009/811/675/GCF_009811675.1_ASM981167v1		assembly from type material	4435731	64.79	104	0.9905	1	0.9998	1	114	162935	7	33243	29	4107
GCF_009826855.1	PRJNA224116	SAMN13679872	WUML00000000.1	na	352475	352475	Shinella zoogloeoides	strain=DSM 287		latest	Contig	Major	Full	2020-01-01	ASM982685v1	Beijing Academy of Agriculture and Forestry Science	GCA_009826855.1	identical	ftp://ftp.ncbi.nlm.nih.gov/genomes/all/GCF/009/826/855/GCF_009826855.1_ASM982685v1		assembly from type material	4735477	64.52	104	0.9905	1.0192	0.9998	1.0288	101	166671	8	33635	29	4543
GCF_009827055.1	PRJNA224116	SAMN13679416	WUMK00000000.1	representative genome	417745	417745	Shinella kummerowiae	strain=CCBAU 25048		latest	Contig	Major	Full	2020-01-01	ASM982705v1	Beijing Academy of Agriculture and Forestry Science	GCA_009827055.1	identical	ftp://ftp.ncbi.nlm.nih.gov/genomes/all/GCF/009/827/055/GCF_009827055.1_ASM982705v1		assembly from type material	6349068	62.9	104	0.9905	1.0192	0.9998	1.0376	42	525742	5	112123	13	6009
GCF_009830105.1	PRJNA224116	SAMN13684129	WURB00000000.1	representative genome	1128670	1128670	Microvirga makkahensis	strain=KCTC 23863		latest	Contig	Major	Full	2020-01-04	ASM983010v1	Sun Yat-sen University. SYSU	GCA_009830105.1	identical	ftp://ftp.ncbi.nlm.nih.gov/genomes/all/GCF/009/830/105/GCF_009830105.1_ASM983010v1		assembly from type material	5580646	63.1	105	1	1.0381	1	1.066	94	257062	8	40677	34	5439
GCF_009910475.1	PRJNA224116	SAMN13753500	WXYQ00000000.1	representative genome	1712261	1712261	Pyruvatibacter mobilis	strain=GYP-11		latest	Contig	Major	Full	2020-01-21	ASM991047v1	Guangxi University	GCA_009910475.1	identical	ftp://ftp.ncbi.nlm.nih.gov/genomes/all/GCF/009/910/475/GCF_009910475.1_ASM991047v1		assembly from type material	3319072	63.95	104	0.9905	1	0.9814	1	23	450942	4	107196	9	3062
GCF_010500835.1	PRJNA224116	SAMN13781258	JAAAMJ000000000.1	representative genome	2047720	2047720	Aurantimonas aggregata	strain=KCTC 52919		latest	Scaffold	Major	Full	2020-02-12	ASM1050083v1	Zhejiang Wanli University	GCA_010500835.1	identical	ftp://ftp.ncbi.nlm.nih.gov/genomes/all/GCF/010/500/835/GCF_010500835.1_ASM1050083v1		assembly from type material	4861770	66.54	104	0.9905	1	0.9814	1	95	186498	7	32746	29	4690
GCF_010669125.1	PRJNA224116	SAMN14048691		representative genome	1745854	1745854	Ancylobacter pratisalsi	strain=DSM 102029		latest	Complete Genome	Major	Full	2020-02-17	ASM1066912v1	Shanghai Jiao Tong University	GCA_010669125.1	identical	ftp://ftp.ncbi.nlm.nih.gov/genomes/all/GCF/010/669/125/GCF_010669125.1_ASM1066912v1		assembly from type material	4778271	65.93	104	0.9905	1.0096	0.9814	1.0239	2	4618530	1	4618530	1	4434
GCF_011045115.1	PRJNA224116	SAMN14167761	JAAKZG000000000.1	representative genome	1776730	1776730	Mesorhizobium zhangyense	strain=CGMCC 1.15528		latest	Contig	Major	Full	2020-03-01	ASM1104511v1	Beijing Academy of Agriculture and Forestry Science	GCA_011045115.1	identical	ftp://ftp.ncbi.nlm.nih.gov/genomes/all/GCF/011/045/115/GCF_011045115.1_ASM1104511v1		assembly from type material	6357320	61.33	104	0.9905	1.0192	0.9814	1.026	64	551741	5	82674	19	6067
GCF_011045125.1	PRJNA224116	SAMN14167759	JAAKZF000000000.1	representative genome	475069	475069	Mesorhizobium camelthorni	strain=CCNWXJ 40-4		latest	Contig	Major	Full	2020-03-01	ASM1104512v1	Beijing Academy of Agriculture and Forestry Science	GCA_011045125.1	identical	ftp://ftp.ncbi.nlm.nih.gov/genomes/all/GCF/011/045/125/GCF_011045125.1_ASM1104512v1		assembly from type material	7298447	62.39	104	0.9905	1.0096	0.9814	1.026	346	74213	25	10829	118	7305
GCF_011045155.1	PRJNA224116	SAMN14167780	JAAKZH000000000.1	na	240521	240521	Rhizobium daejeonense	strain=CCBAU10050		latest	Contig	Major	Full	2020-03-01	ASM1104515v1	Beijing Academy of Agriculture and Forestry Science	GCA_011045155.1	identical	ftp://ftp.ncbi.nlm.nih.gov/genomes/all/GCF/011/045/155/GCF_011045155.1_ASM1104515v1		assembly from type material	5118252	60.48	104	0.9905	1.0192	0.9814	1.0239	25	726499	3	140999	10	4835
GCF_011317445.1	PRJNA224116	SAMN13402805	JAAAPL000000000.1	na	449973	449973	Chelativorans multitrophicus	strain=DSM 9103		latest	Contig	Major	Full	2020-03-16	ASM1131744v1	University of Jinan	GCA_011317445.1	identical	ftp://ftp.ncbi.nlm.nih.gov/genomes/all/GCF/011/317/445/GCF_011317445.1_ASM1131744v1		assembly from type material	4821260	61.02	104	0.9905	1.0288	0.9814	1.017	15	778588	2	148303	6	4602
GCF_011317485.1	PRJNA224116	SAMN13675212	WUJM00000000.1	na	1920512	1920512	Oharaeibacter diazotrophicus	strain=SM30		latest	Contig	Major	Full	2020-03-16	ASM1131748v1	University of Jinan	GCA_011317485.1	identical	ftp://ftp.ncbi.nlm.nih.gov/genomes/all/GCF/011/317/485/GCF_011317485.1_ASM1131748v1		assembly from type material	4884710	71.44	104	0.9905	1.0096	0.9814	1.0196	810	10438	135	2880	473	5102
GCF_011317505.1	PRJNA224116	SAMN13394551	WUJL00000000.1	na	449974	449974	Chelativorans oligotrophicus	strain=LPM-4		latest	Contig	Major	Full	2020-03-16	ASM1131750v1	University of Jinan	GCA_011317505.1	identical	ftp://ftp.ncbi.nlm.nih.gov/genomes/all/GCF/011/317/505/GCF_011317505.1_ASM1131750v1		assembly from type material	4798186	61.05	104	0.9905	1.0288	0.9814	1.017	20	838228	3	181522	8	4614
GCF_011761465.1	PRJNA224116	SAMN12025102	JAASRT000000000.1	na	1333996	1333996	Variibacter gotjawalensis	strain=CECT 8514		latest	Scaffold	Major	Full	2020-03-27	ASM1176146v1	DOE Joint Genome Institute	GCA_011761465.1	identical	ftp://ftp.ncbi.nlm.nih.gov/genomes/all/GCF/011/761/465/GCF_011761465.1_ASM1176146v1		assembly from type material	4585075	62.23	104	0.9905	1.0192	0.9814	1.0216	2	3919183	1	665892	2	4445
GCF_900045375.1	PRJNA224116	SAMEA3722810	FCNL00000000.1	na	1183423	358	Agrobacterium tumefaciens str. B6	strain=B6		latest	Scaffold	Major	Full	2017-03-23	AHY_PRJEB12187_v1	Genoscope CEA	GCA_900045375.1	identical	ftp://ftp.ncbi.nlm.nih.gov/genomes/all/GCF/900/045/375/GCF_900045375.1_AHY_PRJEB12187_v1		assembly from synonym type material	5845831	59.07	105	1	1	1	1	4	2080173	2	664626	3	5569
GCF_900094545.1	PRJNA224116	SAMN04487813	FMAH00000000.1	representative genome	411945	411945	Rhizobium miluonense	strain=HAMBI 2971		latest	Scaffold	Major	Full	2016-08-04	IMG-taxon 2617270742 annotated assembly	DOE - JOINT GENOME INSTITUTE	GCA_900094545.1	identical	ftp://ftp.ncbi.nlm.nih.gov/genomes/all/GCF/900/094/545/GCF_900094545.1_IMG-taxon_2617270742_annotated_assembly		assembly from type material	6808054	59.68	105	1	1.0667	1	1.0376	103	114032	18	37061	57	6477
GCF_900094555.1	PRJNA224116	SAMN04487811	FMAC00000000.1	representative genome	52131	52131	Rhizobium hainanense	strain=CCBAU 57015		latest	Scaffold	Major	Full	2017-01-11	IMG-taxon 2615840609 annotated assembly	DOE - JOINT GENOME INSTITUTE	GCA_900094555.1	identical	ftp://ftp.ncbi.nlm.nih.gov/genomes/all/GCF/900/094/555/GCF_900094555.1_IMG-taxon_2615840609_annotated_assembly		assembly from type material	7252624	59.64	105	1	1.0286	1	1.0376	31	569803	5	117378	16	6780
GCF_900094565.1	PRJNA224116	SAMN04487812	FMAF00000000.1	representative genome	293958	293958	Rhizobium lusitanum	strain=P1-7		latest	Scaffold	Major	Full	2016-08-05	IMG-taxon 2615840626 annotated assembly	DOE - JOINT GENOME INSTITUTE	GCA_900094565.1	identical	ftp://ftp.ncbi.nlm.nih.gov/genomes/all/GCF/900/094/565/GCF_900094565.1_IMG-taxon_2615840626_annotated_assembly		assembly from type material	7921970	59.63	105	1	1.0476	1	1.0376	79	220014	9	48294	37	7600
GCF_900094575.1	PRJNA224116	SAMN04487810	FMAE00000000.1	representative genome	108015	108015	Bradyrhizobium yuanmingense	strain=CCBAU 10071		latest	Scaffold	Major	Full	2016-08-05	IMG-taxon 2617270741 annotated assembly	DOE - JOINT GENOME INSTITUTE	GCA_900094575.1	identical	ftp://ftp.ncbi.nlm.nih.gov/genomes/all/GCF/900/094/575/GCF_900094575.1_IMG-taxon_2617270741_annotated_assembly		assembly from type material	8201522	63.77	104	0.9905	1.0288	0.9814	1.0229	108	804802	5	37101	17	7852
GCF_900094585.1	PRJNA224116	SAMN04487814	FMAG00000000.1	representative genome	410764	410764	Rhizobium multihospitium	strain=HAMBI 2975		latest	Scaffold	Major	Full	2016-08-04	IMG-taxon 2615840698 annotated assembly	DOE - JOINT GENOME INSTITUTE	GCA_900094585.1	identical	ftp://ftp.ncbi.nlm.nih.gov/genomes/all/GCF/900/094/585/GCF_900094585.1_IMG-taxon_2615840698_annotated_assembly		assembly from type material	7319877	59.78	105	1	1.0571	1	1.0582	19	951609	4	170784	11	6862
GCF_900094605.1	PRJNA224116	SAMN04487809	FMAI00000000.1	representative genome	1761772	1761772	Bradyrhizobium shewense	strain=ERR11		latest	Scaffold	Major	Full	2016-08-05	IMG-taxon 2617270735 annotated assembly	DOE - JOINT GENOME INSTITUTE	GCA_900094605.1	identical	ftp://ftp.ncbi.nlm.nih.gov/genomes/all/GCF/900/094/605/GCF_900094605.1_IMG-taxon_2617270735_annotated_assembly		assembly from type material	9163226	63.22	104	0.9905	1.0288	0.9814	1.0488	102	278998	11	53703	39	8629
GCF_900094625.1	PRJNA224116	SAMN04487815	FMAJ00000000.1	representative genome	1138170	1138170	Rhizobium aethiopicum	strain=HBR26		latest	Scaffold	Major	Full	2016-08-04	IMG-taxon 2615840624 annotated assembly	DOE - JOINT GENOME INSTITUTE	GCA_900094625.1	identical	ftp://ftp.ncbi.nlm.nih.gov/genomes/all/GCF/900/094/625/GCF_900094625.1_IMG-taxon_2615840624_annotated_assembly		assembly from type material	6557588	61.07	104	0.9905	1.0288	0.9814	1.0337	62	391165	6	56648	23	6270
GCF_900099775.1	PRJNA224116	SAMN02927900	FMTM00000000.1	representative genome	158890	158890	Rhizobium loessense	strain=CGMCC 1.3401		latest	Scaffold	Major	Full	2016-10-13	IMG-taxon 2596583570 annotated assembly	DOE - JOINT GENOME INSTITUTE	GCA_900099775.1	identical	ftp://ftp.ncbi.nlm.nih.gov/genomes/all/GCF/900/099/775/GCF_900099775.1_IMG-taxon_2596583570_annotated_assembly		assembly from type material	6728492	59.63	104	0.9905	1.0192	0.9918	1.0341	32	484887	4	112264	15	6518
GCF_900099905.1	PRJNA224116	SAMN05428953	FNEE00000000.1	representative genome	1004279	1004279	Mesorhizobium muleiense	strain=CGMCC 1.11022		latest	Scaffold	Major	Full	2016-10-21	IMG-taxon 2675903064 annotated assembly	DOE - JOINT GENOME INSTITUTE	GCA_900099905.1	identical	ftp://ftp.ncbi.nlm.nih.gov/genomes/all/GCF/900/099/905/GCF_900099905.1_IMG-taxon_2675903064_annotated_assembly		assembly from type material	6809960	62.26	104	0.9905	1.0288	0.9814	1.0607	61	257857	8	70708	29	6563
GCF_900100155.1	PRJNA224116	SAMN05660859	FMTP00000000.1	representative genome	177413	177413	Ancylobacter rudongensis	strain=CGMCC 1.1761		latest	Contig	Major	Full	2016-10-13	IMG-taxon 2596583652 annotated assembly	DOE - JOINT GENOME INSTITUTE	GCA_900100155.1	identical	ftp://ftp.ncbi.nlm.nih.gov/genomes/all/GCF/900/100/155/GCF_900100155.1_IMG-taxon_2596583652_annotated_assembly		assembly from type material	4505084	67.85	104	0.9905	1.0192	0.9814	1.0495	18	664556	3	170331	9	4154
GCF_900100455.1	PRJNA224116	SAMN05421742	FNCV00000000.1	representative genome	83401	83401	Roseospirillum parvum	strain=930I		latest	Scaffold	Major	Full	2016-10-21	IMG-taxon 2675903017 annotated assembly	DOE - JOINT GENOME INSTITUTE	GCA_900100455.1	identical	ftp://ftp.ncbi.nlm.nih.gov/genomes/all/GCF/900/100/455/GCF_900100455.1_IMG-taxon_2675903017_annotated_assembly		assembly from type material	3497210	69.89	105	1	1.0095	1	1.022	37	337174	4	63550	12	3075
GCF_900100665.1	PRJNA224116	SAMN04487974	FNCS00000000.1	representative genome	440168	440168	Pelagibacterium luteolum	strain=CGMCC 1.10267		latest	Scaffold	Major	Full	2016-10-21	IMG-taxon 2617270882 annotated assembly	DOE - JOINT GENOME INSTITUTE	GCA_900100665.1	identical	ftp://ftp.ncbi.nlm.nih.gov/genomes/all/GCF/900/100/665/GCF_900100665.1_IMG-taxon_2617270882_annotated_assembly		assembly from type material	4296818	60.41	104	0.9905	1	0.9807	1	50	210288	5	50033	22	4290
GCF_900102105.1	PRJNA224116	SAMN05421750	FNBB00000000.1	na	648995	648995	Rhizobium pusense	strain=LMG 25623		latest	Scaffold	Major	Full	2016-10-21	IMG-taxon 2671180227 annotated assembly	DOE - JOINT GENOME INSTITUTE	GCA_900102105.1	identical	ftp://ftp.ncbi.nlm.nih.gov/genomes/all/GCF/900/102/105/GCF_900102105.1_IMG-taxon_2671180227_annotated_assembly		assembly from type material	5283618	59.23	104	0.9905	1.0192	0.9918	1.0236	28	405057	4	120246	14	5067
GCF_900102135.1	PRJNA224116	SAMN02927923	FMVJ00000000.1	representative genome	549386	549386	Microvirga guangxiensis	strain=CGMCC 1.7666		latest	Scaffold	Major	Full	2016-10-17	IMG-taxon 2596583582 annotated assembly	DOE - JOINT GENOME INSTITUTE	GCA_900102135.1	identical	ftp://ftp.ncbi.nlm.nih.gov/genomes/all/GCF/900/102/135/GCF_900102135.1_IMG-taxon_2596583582_annotated_assembly		assembly from type material	4721732	61.4	105	1	1.0476	1	1.044	34	407384	5	104115	15	4531
GCF_900102525.1	PRJNA224116	SAMN05421844	FNBZ00000000.1	representative genome	1036780	1036780	Bosea robiniae	strain=DSM 26672		latest	Contig	Major	Full	2016-10-21	IMG-taxon 2675903146 annotated assembly	DOE - JOINT GENOME INSTITUTE	GCA_900102525.1	identical	ftp://ftp.ncbi.nlm.nih.gov/genomes/all/GCF/900/102/525/GCF_900102525.1_IMG-taxon_2675903146_annotated_assembly		assembly from type material	5279103	66.34	103	0.981	1	0.9813	1	21	568074	4	236884	9	5006
GCF_900102695.1	PRJNA224116	SAMN03080610	FMVW00000000.1	representative genome	1120955	1080	Afifella marina DSM 2698	strain=DSM 2698		latest	Contig	Major	Full	2016-10-17	IMG-taxon 2595699009 annotated assembly	DOE - JOINT GENOME INSTITUTE	GCA_900102695.1	identical	ftp://ftp.ncbi.nlm.nih.gov/genomes/all/GCF/900/102/695/GCF_900102695.1_IMG-taxon_2595699009_annotated_assembly		assembly from type material	3963421	63.25	103	0.981	1	0.9732	1	24	411663	3	118601	10	3688
GCF_900103325.1	PRJNA224116	SAMN02927914	FMXM00000000.1	representative genome	1165689	1165689	Mesorhizobium qingshengii	strain=CGMCC 1.12097		latest	Scaffold	Major	Full	2016-10-21	IMG-taxon 2596583656 annotated assembly	DOE - JOINT GENOME INSTITUTE	GCA_900103325.1	identical	ftp://ftp.ncbi.nlm.nih.gov/genomes/all/GCF/900/103/325/GCF_900103325.1_IMG-taxon_2596583656_annotated_assembly		assembly from type material	7063626	62.63	104	0.9905	1.0385	0.9814	1.0586	121	254545	9	48844	30	6849
GCF_900103445.1	PRJNA224116	SAMN05216360	FNHS00000000.1	representative genome	582672	582672	Methylobacterium phyllostachyos	strain=BL47		latest	Scaffold	Major	Full	2016-10-21	IMG-taxon 2651870120 annotated assembly	DOE - JOINT GENOME INSTITUTE	GCA_900103445.1	identical	ftp://ftp.ncbi.nlm.nih.gov/genomes/all/GCF/900/103/445/GCF_900103445.1_IMG-taxon_2651870120_annotated_assembly		assembly from type material	6015046	68.7	104	0.9905	1.0288	0.9745	1.0363	47	305152	8	81298	21	5790
GCF_900104305.1	PRJNA224116	SAMN04488061	FNJC00000000.1	representative genome	418854	418854	Filomicrobium insigne	strain=CGMCC 1.6497		latest	Scaffold	Major	Full	2016-10-21	IMG-taxon 2617270918 annotated assembly	DOE - JOINT GENOME INSTITUTE	GCA_900104305.1	identical	ftp://ftp.ncbi.nlm.nih.gov/genomes/all/GCF/900/104/305/GCF_900104305.1_IMG-taxon_2617270918_annotated_assembly		assembly from type material	3847194	57.4	103	0.981	1.0194	0.9732	1.0477	10	912011	2	219225	5	3638
GCF_900104485.1	PRJNA224116	SAMN02982931	FMXQ00000000.1	representative genome	665467	665467	Bauldia litoralis	strain=ATCC 35022		latest	Contig	Major	Full	2016-10-21	IMG-taxon 2597490370 annotated assembly	DOE - JOINT GENOME INSTITUTE	GCA_900104485.1	identical	ftp://ftp.ncbi.nlm.nih.gov/genomes/all/GCF/900/104/485/GCF_900104485.1_IMG-taxon_2597490370_annotated_assembly		assembly from type material	5094548	65.76	102	0.9714	1.0392	0.9547	1.0502	29	463599	4	173196	11	4772
GCF_900108245.1	PRJNA224116	SAMN04488115	FNUY00000000.1	representative genome	1036778	1036778	Bosea lathyri	strain=DSM 26656		latest	Scaffold	Major	Full	2016-10-24	IMG-taxon 2622736433 annotated assembly	DOE - JOINT GENOME INSTITUTE	GCA_900108245.1	identical	ftp://ftp.ncbi.nlm.nih.gov/genomes/all/GCF/900/108/245/GCF_900108245.1_IMG-taxon_2622736433_annotated_assembly		assembly from type material	5918613	64.79	102	0.9714	1.0098	0.9627	1.0265	25	399699	5	92488	15	5507
GCF_900108425.1	PRJNA224116	SAMEA4501419	FNXB00000000.1	representative genome	501024	501024	Rhizobium tibeticum		CCBAU85039	latest	Contig	Major	Full	2016-11-16	Tibet	CEBITEC	GCA_900108425.1	identical	ftp://ftp.ncbi.nlm.nih.gov/genomes/all/GCF/900/108/425/GCF_900108425.1_Tibet		assembly from type material	6912941	59.71	103	0.981	1.0291	0.9813	1.0383	167	153141	15	23708	54	6925
GCF_900109605.1	PRJNA224116	SAMN04487976	FOAM00000000.1	na	464029	464029	Rhizobium oryzae	strain=CGMCC 1.7048		latest	Scaffold	Major	Full	2016-10-31	IMG-taxon 2617270885 annotated assembly	DOE - JOINT GENOME INSTITUTE	GCA_900109605.1	identical	ftp://ftp.ncbi.nlm.nih.gov/genomes/all/GCF/900/109/605/GCF_900109605.1_IMG-taxon_2617270885_annotated_assembly		assembly from type material	5388788	62.78	103	0.981	1.0388	0.9813	1.0564	52	225653	8	83507	22	4797
GCF_900110205.1	PRJNA224116	SAMN05216228	FOCV00000000.1	na	501024	501024	Rhizobium tibeticum	strain=CGMCC 1.7071		latest	Scaffold	Major	Full	2016-11-17	IMG-taxon 2671180023 annotated assembly	DOE - JOINT GENOME INSTITUTE	GCA_900110205.1	identical	ftp://ftp.ncbi.nlm.nih.gov/genomes/all/GCF/900/110/205/GCF_900110205.1_IMG-taxon_2671180023_annotated_assembly		assembly from type material	7065782	59.64	103	0.981	1.0291	0.9813	1.0383	166	152901	15	20261	56	7137
GCF_900110435.1	PRJNA224116	SAMN05444123	FODT00000000.1	representative genome	1513892	1513892	Rhodopseudomonas pseudopalustris	strain=DSM 123		latest	Scaffold	Major	Full	2016-10-31	IMG-taxon 2671180228 annotated assembly	DOE - JOINT GENOME INSTITUTE	GCA_900110435.1	identical	ftp://ftp.ncbi.nlm.nih.gov/genomes/all/GCF/900/110/435/GCF_900110435.1_IMG-taxon_2671180228_annotated_assembly		assembly from type material	5272456	64.61	104	0.9905	1	0.9814	1	28	409479	5	134532	14	4826
GCF_900112505.1	PRJNA224116	SAMN04488059	FOMB00000000.1	na	728005	728005	Devosia psychrophila	strain=CGMCC 1.10210		latest	Scaffold	Major	Full	2016-11-02	IMG-taxon 2617270931 annotated assembly	DOE - JOINT GENOME INSTITUTE	GCA_900112505.1	identical	ftp://ftp.ncbi.nlm.nih.gov/genomes/all/GCF/900/112/505/GCF_900112505.1_IMG-taxon_2617270931_annotated_assembly		assembly from type material	4328295	61.17	105	1	1.0095	1	1.021	85	117720	11	26366	39	4288
GCF_900113465.1	PRJNA224116	SAMN05192567	FOPK00000000.1	na	418223	418223	Methylobacterium phyllosphaerae	strain=CBMB27		latest	Scaffold	Major	Full	2016-11-05	IMG-taxon 2651870129 annotated assembly	DOE - JOINT GENOME INSTITUTE	GCA_900113465.1	identical	ftp://ftp.ncbi.nlm.nih.gov/genomes/all/GCF/900/113/465/GCF_900113465.1_IMG-taxon_2651870129_annotated_assembly		assembly from type material	6203749	69.6	104	0.9905	1.0481	0.9745	1.0588	81	187673	13	51646	37	5823
GCF_900113485.1	PRJNA224116	SAMN05192565	FOPM00000000.1	representative genome	582675	582675	Methylobacterium gossipiicola	strain=Gh-105		latest	Scaffold	Major	Full	2016-11-02	IMG-taxon 2651870128 annotated assembly	DOE - JOINT GENOME INSTITUTE	GCA_900113485.1	identical	ftp://ftp.ncbi.nlm.nih.gov/genomes/all/GCF/900/113/485/GCF_900113485.1_IMG-taxon_2651870128_annotated_assembly		assembly from type material	4524655	68.68	103	0.981	1.0194	0.9743	1.04	77	141167	9	35875	31	4229
GCF_900113935.1	PRJNA224116	SAMN03080618	FORF00000000.1	representative genome	1121003	561088	Aquamicrobium aerolatum DSM 21857	strain=DSM 21857		latest	Scaffold	Major	Full	2016-11-02	IMG-taxon 2595699008 annotated assembly	DOE - JOINT GENOME INSTITUTE	GCA_900113935.1	identical	ftp://ftp.ncbi.nlm.nih.gov/genomes/all/GCF/900/113/935/GCF_900113935.1_IMG-taxon_2595699008_annotated_assembly		assembly from type material	3640212	60.06	104	0.9905	1	0.9814	1	49	170747	8	37892	24	3536
GCF_900114255.1	PRJNA224116	SAMN04488498	FOSL00000000.1	representative genome	335020	335020	Mesorhizobium albiziae	strain=DSM 21822		latest	Scaffold	Major	Full	2019-09-12	IMG-taxon 2616644812 annotated assembly	DOE - JOINT GENOME INSTITUTE	GCA_900114255.1	identical	ftp://ftp.ncbi.nlm.nih.gov/genomes/all/GCF/900/114/255/GCF_900114255.1_IMG-taxon_2616644812_annotated_assembly		assembly from type material	6273155	62.08	104	0.9905	1.0192	0.9814	1.0499	92	246691	8	32367	34	6178
GCF_900114285.1	PRJNA224116	SAMN05444581	FOSN00000000.1	representative genome	1612308	1612308	Methylocapsa palsarum	strain=NE2		latest	Contig	Major	Full	2016-11-02	IMG-taxon 2675903028 annotated assembly	DOE - JOINT GENOME INSTITUTE	GCA_900114285.1	identical	ftp://ftp.ncbi.nlm.nih.gov/genomes/all/GCF/900/114/285/GCF_900114285.1_IMG-taxon_2675903028_annotated_assembly		assembly from type material	4105299	61.74	105	1	1.0095	1	1.0121	78	219649	7	30218	23	3826
GCF_900114375.1	PRJNA224116	SAMN04488125	FOSV00000000.1	representative genome	414703	414703	Methylorubrum salsuginis	strain=CGMCC 1.6474		latest	Scaffold	Major	Full	2016-11-02	IMG-taxon 2617270908 annotated assembly	DOE - JOINT GENOME INSTITUTE	GCA_900114375.1	identical	ftp://ftp.ncbi.nlm.nih.gov/genomes/all/GCF/900/114/375/GCF_900114375.1_IMG-taxon_2617270908_annotated_assembly		assembly from type material	5323773	69.61	103	0.981	1.0194	0.9743	1.0469	64	174813	9	53039	29	5041
GCF_900114535.1	PRJNA224116	SAMN05192568	FOTK00000000.1	representative genome	582667	582667	Methylobacterium pseudosasicola	strain=BL36		latest	Scaffold	Major	Full	2016-11-05	IMG-taxon 2654588108 annotated assembly	DOE - JOINT GENOME INSTITUTE	GCA_900114535.1	identical	ftp://ftp.ncbi.nlm.nih.gov/genomes/all/GCF/900/114/535/GCF_900114535.1_IMG-taxon_2654588108_annotated_assembly		assembly from type material	6845277	68.37	103	0.981	1.0388	0.9743	1.0886	129	133435	16	24801	56	6799
GCF_900114935.1	PRJNA224116	SAMN05192571	FOUQ00000000.1	representative genome	1166257	1166257	Pleomorphomonas diazotrophica	strain=R5-392		latest	Scaffold	Major	Full	2019-09-11	IMG-taxon 2651870105 annotated assembly	DOE - JOINT GENOME INSTITUTE	GCA_900114935.1	identical	ftp://ftp.ncbi.nlm.nih.gov/genomes/all/GCF/900/114/935/GCF_900114935.1_IMG-taxon_2651870105_annotated_assembly		assembly from type material	4521864	65.06	104	0.9905	1	0.9814	1	24	308834	5	109225	14	4222
GCF_900115225.1	PRJNA224116	SAMN04488056	FOVR00000000.1	representative genome	655353	655353	Cohaesibacter marisflavi	strain=CGMCC 1.9157		latest	Scaffold	Major	Full	2016-11-02	IMG-taxon 2617270874 annotated assembly	DOE - JOINT GENOME INSTITUTE	GCA_900115225.1	identical	ftp://ftp.ncbi.nlm.nih.gov/genomes/all/GCF/900/115/225/GCF_900115225.1_IMG-taxon_2617270874_annotated_assembly		assembly from type material	5339722	53.8	103	0.981	1.0194	0.9622	1.0354	41	284617	5	95246	17	4842
GCF_900116175.1	PRJNA224116	SAMN04488557	FPCH00000000.1	representative genome	51670	51670	Hyphomicrobium facile	strain=DSM 1565		latest	Contig	Major	Full	2016-11-02	IMG-taxon 2636416034 annotated assembly	DOE - JOINT GENOME INSTITUTE	GCA_900116175.1	identical	ftp://ftp.ncbi.nlm.nih.gov/genomes/all/GCF/900/116/175/GCF_900116175.1_IMG-taxon_2636416034_annotated_assembly		assembly from type material	4425354	59.97	103	0.981	1.0194	0.9732	1.0315	5	1323007	2	319346	4	4154
GCF_900116545.1	PRJNA224116	SAMN05216456	FPCK00000000.1	representative genome	429728	429728	Devosia crocina	strain=IPL20		latest	Scaffold	Major	Full	2016-11-02	IMG-taxon 2675903690 annotated assembly	DOE - JOINT GENOME INSTITUTE	GCA_900116545.1	identical	ftp://ftp.ncbi.nlm.nih.gov/genomes/all/GCF/900/116/545/GCF_900116545.1_IMG-taxon_2675903690_annotated_assembly		assembly from type material	3724570	61.33	104	0.9905	1.0096	0.9807	1.0227	6	1963998	1	440006	4	3610
GCF_900116675.1	PRJNA224116	SAMN05192541	FPBQ00000000.1	representative genome	858423	858423	Bradyrhizobium arachidis	strain=LMG 26795		latest	Scaffold	Major	Full	2016-11-05	IMG-taxon 2654588141 annotated assembly	DOE - JOINT GENOME INSTITUTE	GCA_900116675.1	identical	ftp://ftp.ncbi.nlm.nih.gov/genomes/all/GCF/900/116/675/GCF_900116675.1_IMG-taxon_2654588141_annotated_assembly		assembly from type material	9793799	63.62	104	0.9905	1.0192	0.9814	1.0486	98	213844	12	70254	43	9325
GCF_900119845.1	PRJNA224116	SAMN02983003	FPKU00000000.1	representative genome	665118	665118	Devosia enhydra	strain=ATCC 23634		latest	Scaffold	Major	Full	2016-11-20	IMG-taxon 2596583700 annotated assembly	DOE - JOINT GENOME INSTITUTE	GCA_900119845.1	identical	ftp://ftp.ncbi.nlm.nih.gov/genomes/all/GCF/900/119/845/GCF_900119845.1_IMG-taxon_2596583700_annotated_assembly		assembly from type material	4221709	65.63	105	1	1.0095	1	1.0222	5	1164472	2	781909	3	4017
GCF_900128975.1	PRJNA224116	SAMN02745223	FQVC00000000.1	na	1121477	288995	Devosia limi DSM 17137	strain=DSM 17137		latest	Scaffold	Major	Full	2016-12-03	IMG-taxon 2582580747 annotated assembly	DOE - JOINT GENOME INSTITUTE	GCA_900128975.1	identical	ftp://ftp.ncbi.nlm.nih.gov/genomes/all/GCF/900/128/975/GCF_900128975.1_IMG-taxon_2582580747_annotated_assembly		assembly from type material	4297655	62.71	104	0.9905	1.0192	0.9814	1.0178	25	302432	5	86749	15	4108
GCF_900129325.1	PRJNA224116	SAMN02745157	FQUP00000000.1	representative genome	1122133	446684	Kaistia soli DSM 19436	strain=DSM 19436		latest	Scaffold	Major	Full	2016-12-03	IMG-taxon 2582581302 annotated assembly	DOE - JOINT GENOME INSTITUTE	GCA_900129325.1	identical	ftp://ftp.ncbi.nlm.nih.gov/genomes/all/GCF/900/129/325/GCF_900129325.1_IMG-taxon_2582581302_annotated_assembly		assembly from type material	5237791	64.5	105	1	1.0095	1	1.0235	15	857843	2	201350	7	4937
GCF_900141975.1	PRJNA224116	SAMN02745911	FQZC00000000.1	na	1121026	370622	Aureimonas altamirensis DSM 21988	strain=DSM 21988		latest	Scaffold	Major	Full	2016-12-03	IMG-taxon 2585427611 annotated assembly	DOE - JOINT GENOME INSTITUTE	GCA_900141975.1	identical	ftp://ftp.ncbi.nlm.nih.gov/genomes/all/GCF/900/141/975/GCF_900141975.1_IMG-taxon_2585427611_annotated_assembly		assembly from type material	4190965	64.84	104	0.9905	1.0288	0.9814	1.052	11	1054710	2	358910	5	3953
GCF_900148505.1	PRJNA224116	SAMN02745172	FRXO00000000.1	representative genome	1123029	433840	Pseudoxanthobacter soli DSM 19599	strain=DSM 19599		latest	Scaffold	Major	Full	2016-12-10	IMG-taxon 2585428043 annotated assembly	DOE - JOINT GENOME INSTITUTE	GCA_900148505.1	identical	ftp://ftp.ncbi.nlm.nih.gov/genomes/all/GCF/900/148/505/GCF_900148505.1_IMG-taxon_2585428043_annotated_assembly		assembly from type material	5165242	67.84	104	0.9905	1	0.9814	1	27	567156	4	123251	12	4336
GCF_900167365.1	PRJNA224116	SAMN05428963	FUXL00000000.1	representative genome	1365950	1365950	Consotaella salsifontis	strain=USBA 369		latest	Scaffold	Major	Full	2017-03-04	IMG-taxon 2657245368 annotated assembly	DOE - JOINT GENOME INSTITUTE	GCA_900167365.1	identical	ftp://ftp.ncbi.nlm.nih.gov/genomes/all/GCF/900/167/365/GCF_900167365.1_IMG-taxon_2657245368_annotated_assembly		assembly from type material	4652084	64.3	104	0.9905	1.0577	0.9814	1.0893	33	278522	6	95080	19	4304
GCF_900168195.1	PRJNA224116	SAMN05660750	FUYX00000000.1	representative genome	53254	53254	Bosea thiooxidans	strain=DSM 9653		latest	Contig	Major	Full	2017-03-08	IMG-taxon 2595698224 annotated assembly	DOE - JOINT GENOME INSTITUTE	GCA_900168195.1	identical	ftp://ftp.ncbi.nlm.nih.gov/genomes/all/GCF/900/168/195/GCF_900168195.1_IMG-taxon_2595698224_annotated_assembly		assembly from type material	5369373	67.38	104	0.9905	1	0.9998	1	34	257505	6	93956	18	5074
GCF_900176465.1	PRJNA224116	SAMN06297251	FWXR00000000.1	representative genome	937218	937218	Fulvimarina manganoxydans	strain=CGMCC 1.10972		latest	Contig	Major	Full	2017-04-08	IMG-taxon 2718217637 annotated assembly	DOE - JOINT GENOME INSTITUTE	GCA_900176465.1	identical	ftp://ftp.ncbi.nlm.nih.gov/genomes/all/GCF/900/176/465/GCF_900176465.1_IMG-taxon_2718217637_annotated_assembly		assembly from type material	4827577	62.89	104	0.9905	1.0288	0.9814	1.0636	55	152022	9	55095	28	4473
GCF_900177655.1	PRJNA224116	SAMN06295905	FXWK00000000.1	representative genome	1096929	1096929	Devosia lucknowensis	strain=L15		latest	Contig	Major	Full	2017-05-13	IMG-taxon 2708742467 annotated assembly	DOE - JOINT GENOME INSTITUTE	GCA_900177655.1	identical	ftp://ftp.ncbi.nlm.nih.gov/genomes/all/GCF/900/177/655/GCF_900177655.1_IMG-taxon_2708742467_annotated_assembly		assembly from type material	3719665	62.85	104	0.9905	1	0.9918	1	3	2536685	1	1177509	2	3604
GCF_900185775.1	PRJNA224116	SAMEA104113790	FYAY00000000.1	representative genome	1820002	1820002	Bartonella mastomydis	strain=008		latest	Scaffold	Major	Full	2019-05-31	PRJEB21083	URMITE	GCA_900185775.1	identical	ftp://ftp.ncbi.nlm.nih.gov/genomes/all/GCF/900/185/775/GCF_900185775.1_PRJEB21083		assembly from type material	2045026	38.43	104	0.9905	1	0.9814	1	12	1231970	1	646707	2	1682
GCF_900187365.1	PRJNA224116	SAMN06265338	FYDG00000000.1	representative genome	1074	1074	Rhodoblastus acidophilus	strain=DSM 137		latest	Contig	Major	Full	2017-06-24	IMG-taxon 2724679731 annotated assembly	DOE - JOINT GENOME INSTITUTE	GCA_900187365.1	identical	ftp://ftp.ncbi.nlm.nih.gov/genomes/all/GCF/900/187/365/GCF_900187365.1_IMG-taxon_2724679731_annotated_assembly		assembly from type material	4711496	65.23	104	0.9905	1	0.9814	1	74	348697	4	33192	20	4428
GCF_900215605.1	PRJNA224116	SAMN06265368	OBEL00000000.1	representative genome	372072	372072	Cohaesibacter gelatinilyticus	strain=DSM 18289		latest	Scaffold	Major	Full	2017-09-28	IMG-taxon 2728369261 annotated assembly	DOE - JOINT GENOME INSTITUTE	GCA_900215605.1	identical	ftp://ftp.ncbi.nlm.nih.gov/genomes/all/GCF/900/215/605/GCF_900215605.1_IMG-taxon_2728369261_annotated_assembly		assembly from type material	5198252	50.47	104	0.9905	1.0192	0.9814	1.0463	15	764773	2	234875	7	4793
GCF_900218015.1	PRJNA224116	SAMN05892882	UFQQ00000000.1	representative genome	999699	999699	Rhodopseudomonas pentothenatexigens	strain=JA575		latest	Scaffold	Major	Full	2018-07-17	IMG-taxon 2740891836 annotated assembly	DOE - JOINT GENOME INSTITUTE	GCA_900218015.1	identical	ftp://ftp.ncbi.nlm.nih.gov/genomes/all/GCF/900/218/015/GCF_900218015.1_IMG-taxon_2740891836_annotated_assembly		assembly from type material	5383361	65.97	103	0.981	1.0097	0.9813	1.0227	69	194650	11	43698	35	4903
GCF_900220975.1	PRJNA224116	SAMN05892877	OBQD00000000.1	representative genome	908946	908946	Rhizobium subbaraonis	strain=JC85		latest	Scaffold	Major	Full	2017-09-28	IMG-taxon 2740891857 annotated assembly	DOE - JOINT GENOME INSTITUTE	GCA_900220975.1	identical	ftp://ftp.ncbi.nlm.nih.gov/genomes/all/GCF/900/220/975/GCF_900220975.1_IMG-taxon_2740891857_annotated_assembly		assembly from type material	6576489	63.07	104	0.9905	1.0481	0.9998	1.044	85	280913	9	48409	30	6280
GCF_900220985.1	PRJNA224116	SAMN05877838	OCPC00000000.1	representative genome	714899	714899	Hoeflea halophila	strain=KCTC 23107		latest	Scaffold	Major	Full	2017-09-28	IMG-taxon 2740891889 annotated assembly	DOE - JOINT GENOME INSTITUTE	GCA_900220985.1	identical	ftp://ftp.ncbi.nlm.nih.gov/genomes/all/GCF/900/220/985/GCF_900220985.1_IMG-taxon_2740891889_annotated_assembly		assembly from type material	4192799	61.06	104	0.9905	1	0.9814	1	16	673033	2	354200	6	3928
GCF_900231165.1	PRJNA224116	SAMEA104312995		representative genome	1482074	1482074	Hartmannibacter diazotrophicus	strain=E19T		latest	Complete Genome	Major	Full	2017-10-25	HDIA1	JLU	GCA_900231165.1	identical	ftp://ftp.ncbi.nlm.nih.gov/genomes/all/GCF/900/231/165/GCF_900231165.1_HDIA1		assembly from type material	5449775	63.97	104	0.9905	1.0192	0.9814	1.0427	2	5327443	1	5327443	1	4989
GCF_900234795.1	PRJNA224116	SAMEA104358467		representative genome	408	408	Methylorubrum extorquens	strain=TK 0001		latest	Complete Genome	Major	Full	2017-12-20	TK0001_PRJEB23178_v1	Genoscope CEA	GCA_900234795.1	identical	ftp://ftp.ncbi.nlm.nih.gov/genomes/all/GCF/900/234/795/GCF_900234795.1_TK0001_PRJEB23178_v1		assembly from type material	5715512	68.29	103	0.981	1.0194	0.9743	1.0325	1	5715512	1	5715512	1	5433
GCF_900445155.1	PRJNA224116	SAMEA4556071	UFSI00000000.1	na	1035	1035	Afipia felis	strain=NCTC12499		latest	Contig	Major	Full	2018-08-08	52067_E01	SC	GCA_900445155.1	identical	ftp://ftp.ncbi.nlm.nih.gov/genomes/all/GCF/900/445/155/GCF_900445155.1_52067_E01		assembly from type material	4195257	60.72	104	0.9905	1.0192	0.9814	1.0442	2	4132564	1	4132564	1	4049
GCF_900445235.1	PRJNA224116	SAMEA101156668	UFSM00000000.1	na	83263	83263	Aminobacter aminovorans	strain=NCTC10684		latest	Contig	Major	Full	2018-08-08	53618_D01	SC	GCA_900445235.1	identical	ftp://ftp.ncbi.nlm.nih.gov/genomes/all/GCF/900/445/235/GCF_900445235.1_53618_D01		assembly from type material	5886880	63.19	104	0.9905	1.0192	0.9814	1.026	5	4995958	1	420426	2	5655
GCF_900445535.1	PRJNA224116	SAMEA104281645	UFTF00000000.1	na	33044	33044	Bartonella doshiae	strain=NCTC12862		latest	Contig	Major	Full	2018-08-07	57948_H01	SC	GCA_900445535.1	identical	ftp://ftp.ncbi.nlm.nih.gov/genomes/all/GCF/900/445/535/GCF_900445535.1_57948_H01		assembly from type material	1844489	38	104	0.9905	1.0192	0.9814	1.0416	2	1832875	1	1832875	1	1602
GCF_900445635.1	PRJNA224116	SAMEA44539168	UFTD00000000.1	na	33045	33045	Bartonella grahamii	strain=NCTC12860		latest	Contig	Major	Full	2018-07-25	51184_C02	SC	GCA_900445635.1	identical	ftp://ftp.ncbi.nlm.nih.gov/genomes/all/GCF/900/445/635/GCF_900445635.1_51184_C02		assembly from type material	2385853	38.18	104	0.9905	1.0096	0.9814	1.0225	5	1314855	1	1036897	2	2086
GCF_900446005.1	PRJNA224116	SAMEA104307684	UFTU00000000.1	na	235	235	Brucella abortus	strain=NCTC10093		latest	Contig	Major	Full	2018-08-07	58116_B01	SC	GCA_900446005.1	identical	ftp://ftp.ncbi.nlm.nih.gov/genomes/all/GCF/900/446/005/GCF_900446005.1_58116_B01		assembly from type material	3281432	57.23	105	1	1.0095	1	1.0121	2	2121370	1	1160062	2	3137
GCF_900446125.1	PRJNA224116	SAMEA104210778	UIGH00000000.1	na	29460	29460	Brucella neotomae	strain=NCTC10084		latest	Contig	Major	Full	2018-08-07	57572_C01	SC	GCA_900446125.1	identical	ftp://ftp.ncbi.nlm.nih.gov/genomes/all/GCF/900/446/125/GCF_900446125.1_57572_C01		assembly from type material	3329628	57.23	105	1	1.0095	1	1.0121	2	2130919	1	1198709	2	3151
GCF_900446135.1	PRJNA224116	SAMEA104307685	UFUD00000000.1	na	236	236	Brucella ovis	strain=NCTC10512		latest	Contig	Major	Full	2018-08-07	58116_C01	SC	GCA_900446135.1	identical	ftp://ftp.ncbi.nlm.nih.gov/genomes/all/GCF/900/446/135/GCF_900446135.1_58116_C01		assembly from type material	3283386	57.2	105	1	1.0095	1	1.0121	2	2119174	1	1164212	2	3231
GCF_900454225.1	PRJNA224116	SAMEA3146534	UGSH00000000.1	na	94625	94625	Ochrobactrum intermedium	strain=NCTC12171		latest	Contig	Major	Full	2018-08-01	34576_H01	SC	GCA_900454225.1	identical	ftp://ftp.ncbi.nlm.nih.gov/genomes/all/GCF/900/454/225/GCF_900454225.1_34576_H01		assembly from type material	4727886	57.74	104	0.9905	1.0192	0.9814	1.0362	3	2608764	1	2059340	2	4490
GCF_900454235.1	PRJNA224116	SAMEA3146533	UGSA00000000.1	na	529	529	Ochrobactrum anthropi	strain=NCTC12168		latest	Contig	Major	Full	2018-08-01	34576_A02	SC	GCA_900454235.1	identical	ftp://ftp.ncbi.nlm.nih.gov/genomes/all/GCF/900/454/235/GCF_900454235.1_34576_A02		assembly from type material	5239764	56.12	104	0.9905	1.0288	0.9814	1.0427	5	2887299	1	1953062	2	5128
GCF_900460605.1	PRJNA224116	SAMEA104307694	UFTY00000000.1	na	29461	29461	Brucella suis	strain=NCTC10316		latest	Contig	Major	Full	2018-08-07	58116_D02	SC	GCA_900460605.1	identical	ftp://ftp.ncbi.nlm.nih.gov/genomes/all/GCF/900/460/605/GCF_900460605.1_58116_D02		assembly from type material	3315136	57.25	105	1	1.0095	1	1.0121	2	2107764	1	1207372	2	3112
GCF_902141855.1	PRJNA224116	SAMEA5673091	CABFVH000000000.1	representative genome	560405	560405	Methylobacterium dankookense	strain=SW08-7		latest	Contig	Major	Full	2019-07-31	SW08-7	UVEG	GCA_902141855.1	identical	ftp://ftp.ncbi.nlm.nih.gov/genomes/all/GCF/902/141/855/GCF_902141855.1_SW08-7		assembly from type material	6149484	70.42	103	0.981	1.0291	0.9743	1.0683	132	107029	18	25454	61	5932
GCF_902150025.1	PRJNA224116	SAMEA5731259	CABFVS000000000.1	representative genome	929795	929795	Bartonella massiliensis	strain=OS09		latest	Contig	Major	Full	2019-07-03	PRJEB33160	URMITE	GCA_902150025.1	identical	ftp://ftp.ncbi.nlm.nih.gov/genomes/all/GCF/902/150/025/GCF_902150025.1_PRJEB33160		assembly from type material	2277694	37.76	104	0.9905	1	0.9814	1	91	107397	8	23231	28	1925
GCF_902153235.1	PRJNA224116	SAMEA5739409	CABFWE000000000.1	representative genome	1233081	1233081	Rhizobium halotolerans	strain=AB21		latest	Scaffold	Major	Full	2019-07-08	JP120.1	UNIVERSITY COLLEGE LONDON	GCA_902153235.1	identical	ftp://ftp.ncbi.nlm.nih.gov/genomes/all/GCF/902/153/235/GCF_902153235.1_JP120.1		assembly from type material	4701665	61.68	105	1	1.019	1	1.0167	20	778372	2	226497	7	4590
GCF_902153245.1	PRJNA224116	SAMEA5739410	CABFWF000000000.1	representative genome	1191678	1191678	Rhizobium endolithicum	strain=JC140		latest	Scaffold	Major	Full	2019-07-08	JP121.1	UNIVERSITY COLLEGE LONDON	GCA_902153245.1	identical	ftp://ftp.ncbi.nlm.nih.gov/genomes/all/GCF/902/153/245/GCF_902153245.1_JP121.1		assembly from type material	4187687	62.73	105	1	1.0095	1	1.0255	20	452093	4	199750	9	4128
GCF_902162175.1	PRJNA224116	SAMEA5757390	CABGUM000000000.1	na	1457016	1457016	Bartonella saheliensis	strain=077		latest	Scaffold	Major	Full	2019-07-11	PRJEB33358	URMITE	GCA_902162175.1	identical	ftp://ftp.ncbi.nlm.nih.gov/genomes/all/GCF/902/162/175/GCF_902162175.1_PRJEB33358		assembly from type material	2258762	38.36	90	0.8571	1.1333	0.8198	1.1681	131	62476	10	7650	54	1987
GCF_902502825.1	PRJNA224116	SAMEA104296051		representative genome	1335061	1335061	Rhizobium flavum	strain=YW14		latest	Complete Genome	Major	Full	2019-10-22	E03_1.2	UNIVERSITY COLLEGE LONDON	GCA_902502825.1	identical	ftp://ftp.ncbi.nlm.nih.gov/genomes/all/GCF/902/502/825/GCF_902502825.1_E03_1.2		assembly from type material	4749058	61.54	105	1	1.019	1	1.0167	5	4055910	1	227935	2	4602
Ga0394399_contigs	NA	NA	NA	NA	NA	NA	NA	NA	NA	NA	NA	NA	NA	NA	NA	NA	NA	NA	NA	NA	NA	6785777	61.35	104	0.9905	1.0192	0.9998	1.0386	73	423565	7	78741	21	6394

## Sheet: Table S2
Table S2. SILVA SSU r138 assignment for the 16S rRNA sequences extracted from genomes.
Access	Name	16S rRNA gene locus tag	SILVA SSU r138 assignment			Sequence
			Order	Family	Genus
Ga0394399	Ensifer terangae SEMIA 6460	Ga0394399_39:401-1883(+)	Rhizobiaceae	Ensifer	Rhizobiales	CTTGAGAGTTTGATCCTGGCTCAGAACGAACGCTGGCGGCAGGCTTAACACATGCAAGTCGAGCGCGTAGCAATACGAGCGGCAGACGGGTGAGTAACGCGTGGGAATCTACCCTTTTCTACGGAATAACGCAGGGAAACTTGTGCTAATACCGTATACGCCCTTTTGGGGAAAGATTTATCGGAGAAGGATGAGCCCGCGTTGGATTAGCTAGTTGGTGGGGTAAAGGCCTACCAAGGCGACGATCCATAGCTGGTCTGAGAGGATGATCAGCCACATTGGGACTGAGACACGGCCCAAACTCCTACGGGAGGCAGCAGTGGGGAATATTGGACAATGGGCGCAAGCCTGATCCAGCCATGCCGCGTGAGTGATGAAGGCCCTAGGGTTGTAAAGCTC…
GCF_000007125.1	Brucella melitensis 16M	BME_RS01910	Rhizobiaceae	Brucella	Rhizobiales	TCAACTTGAGAGTTTGATCCTGGCTCAGAACGAACGCTGGCGGCAGGCTTAACACATGCAAGTCGAGCGCCCCGCAAGGGGAGCGGCAGACGGGTGAGTAACGCGTGGGAACGTACCATTTGCTACGGAATAACTCAGGGAAACTTGTGCTAATACCGTATGTGCCCTTCGGGGGAAAGATTTATCGGCAAATGATCGGCCCGCGTTGGATTAGCTAGTTGGTGGGGTAAAGGCTCACCAAGGCGACGATCCATAGCTGGTCTGAGAGGATGATCAGCCACACTGGGACTGAGACACGGCCCAGACTCCTACGGGAGGCAGCAGTGGGGAATATTGGACAATGGGCGCAAGCCTGATCCAGCCATGCCGCGTGAGTGATGAAGGCCCTAGGGTTGTAAA…
GCF_000007125.1	Brucella melitensis 16M	BME_RS00940	Rhizobiaceae	Brucella	Rhizobiales	TCAACTTGAGAGTTTGATCCTGGCTCAGAACGAACGCTGGCGGCAGGCTTAACACATGCAAGTCGAGCGCCCCGCAAGGGGAGCGGCAGACGGGTGAGTAACGCGTGGGAACGTACCATTTGCTACGGAATAACTCAGGGAAACTTGTGCTAATACCGTATGTGCCCTTCGGGGGAAAGATTTATCGGCAAATGATCGGCCCGCGTTGGATTAGCTAGTTGGTGGGGTAAAGGCTCACCAAGGCGACGATCCATAGCTGGTCTGAGAGGATGATCAGCCACACTGGGACTGAGACACGGCCCAGACTCCTACGGGAGGCAGCAGTGGGGAATATTGGACAATGGGCGCAAGCCTGATCCAGCCATGCCGCGTGAGTGATGAAGGCCCTAGGGTTGTAAA…
GCF_000007125.1	Brucella melitensis 16M	BME_RS11060	Rhizobiaceae	Brucella	Rhizobiales	TCAACTTGAGAGTTTGATCCTGGCTCAGAACGAACGCTGGCGGCAGGCTTAACACATGCAAGTCGAGCGCCCCGCAAGGGGAGCGGCAGACGGGTGAGTAACGCGTGGGAACGTACCATTTGCTACGGAATAACTCAGGGAAACTTGTGCTAATACCGTATGTGCCCTTCGGGGGAAAGATTTATCGGCAAATGATCGGCCCGCGTTGGATTAGCTAGTTGGTGGGGTAAAGGCTCACCAAGGCGACGATCCATAGCTGGTCTGAGAGGATGATCAGCCACACTGGGACTGAGACACGGCCCAGACTCCTACGGGAGGCAGCAGTGGGGAATATTGGACAATGGGCGCAAGCCTGATCCAGCCATGCCGCGTGAGTGATGAAGGCCCTAGGGTTGTAAA…
GCF_000007505.1	Brucella suis 1330	BR_RS15325	Rhizobiaceae	Brucella	Rhizobiales	TCAACTTGAGAGTTTGATCCTGGCTCAGAACGAACGCTGGCGGCAGGCTTAACACATGCAAGTCGAGCGCCCCGCAAGGGGAGCGGCAGACGGGTGAGTAACGCGTGGGAACGTACCATTTGCTACGGAATAACTCAGGGAAACTTGTGCTAATACCGTATGTGCCCTTCGGGGGAAAGATTTATCGGCAAATGATCGGCCCGCGTTGGATTAGCTAGTTGGTGGGGTAAAGGCTCACCAAGGCGACGATCCATAGCTGGTCTGAGAGGATGATCAGCCACACTGGGACTGAGACACGGCCCAGACTCCTACGGGAGGCAGCAGTGGGGAATATTGGACAATGGGCGCAAGCCTGATCCAGCCATGCCGCGTGAGTGATGAAGGCCCTAGGGTTGTAAA…
GCF_000007505.1	Brucella suis 1330	BR_RS07585	Rhizobiaceae	Brucella	Rhizobiales	TCAACTTGAGAGTTTGATCCTGGCTCAGAACGAACGCTGGCGGCAGGCTTAACACATGCAAGTCGAGCGCCCCGCAAGGGGAGCGGCAGACGGGTGAGTAACGCGTGGGAACGTACCATTTGCTACGGAATAACTCAGGGAAACTTGTGCTAATACCGTATGTGCCCTTCGGGGGAAAGATTTATCGGCAAATGATCGGCCCGCGTTGGATTAGCTAGTTGGTGGGGTAAAGGCTCACCAAGGCGACGATCCATAGCTGGTCTGAGAGGATGATCAGCCACACTGGGACTGAGACACGGCCCAGACTCCTACGGGAGGCAGCAGTGGGGAATATTGGACAATGGGCGCAAGCCTGATCCAGCCATGCCGCGTGAGTGATGAAGGCCCTAGGGTTGTAAA…
GCF_000007505.1	Brucella suis 1330	BR_RS08575	Rhizobiaceae	Brucella	Rhizobiales	TCAACTTGAGAGTTTGATCCTGGCTCAGAACGAACGCTGGCGGCAGGCTTAACACATGCAAGTCGAGCGCCCCGCAAGGGGAGCGGCAGACGGGTGAGTAACGCGTGGGAACGTACCATTTGCTACGGAATAACTCAGGGAAACTTGTGCTAATACCGTATGTGCCCTTCGGGGGAAAGATTTATCGGCAAATGATCGGCCCGCGTTGGATTAGCTAGTTGGTGGGGTAAAGGCTCACCAAGGCGACGATCCATAGCTGGTCTGAGAGGATGATCAGCCACACTGGGACTGAGACACGGCCCAGACTCCTACGGGAGGCAGCAGTGGGGAATATTGGACAATGGGCGCAAGCCTGATCCAGCCATGCCGCGTGAGTGATGAAGGCCCTAGGGTTGTAAA…
GCF_000009625.1	Mesorhizobium japonicum MAFF 303099	MAFF_RS14440	Rhizobiaceae	Mesorhizobium	Rhizobiales	AACTTGAGAGTTTGATCCTGGCTCAGAACGAACGCTGGCGGCAGGCTTAACACATGCAAGTCGAGCGCCCCGCAAGGGGAGCGGCAGACGGGTGAGTAACGCGTGGGAATCTACCCATCTCTACGGAACAACTCCGGGAAACTGGAGCTAATACCGTATACGTCCTTTTGGAGAAAGATTTATCGGAGATGGATGAGCCCGCGTTGGATTAGCTAGTTGGTGGGGTAATGGCCTACCAAGGCGACGATCCATAGCTGGTCTGAGAGGATGATCAGCCACACTGGGACTGAGACACGGCCCAGACTCCTACGGGAGGCAGCAGTGGGGAATATTGGACAATGGGCGCAAGCCTGATCCAGCCATGCCGCGTGAGTGATGAAGGCCCTAGGGTTGTAAAGC…
GCF_000009625.1	Mesorhizobium japonicum MAFF 303099	MAFF_RS14480	Rhizobiaceae	Mesorhizobium	Rhizobiales	AACTTGAGAGTTTGATCCTGGCTCAGAACGAACGCTGGCGGCAGGCTTAACACATGCAAGTCGAGCGCCCCGCAAGGGGAGCGGCAGACGGGTGAGTAACGCGTGGGAATCTACCCATCTCTACGGAACAACTCCGGGAAACTGGAGCTAATACCGTATACGTCCTTTTGGAGAAAGATTTATCGGAGATGGATGAGCCCGCGTTGGATTAGCTAGTTGGTGGGGTAATGGCCTACCAAGGCGACGATCCATAGCTGGTCTGAGAGGATGATCAGCCACACTGGGACTGAGACACGGCCCAGACTCCTACGGGAGGCAGCAGTGGGGAATATTGGACAATGGGCGCAAGCCTGATCCAGCCATGCCGCGTGAGTGATGAAGGCCCTAGGGTTGTAAAGC…
GCF_000010525.1	Azorhizobium caulinodans ORS 571	AZC_RS22750	Xanthobacteraceae	Azorhizobium	Rhizobiales	CAACTTGAGAGTTTGATCCTGGCTCAGAGCGAACGCTGGCGGCAGGCCTAACACATGCAAGTCGAGCGCCCAGCAATGGGAGCGGCAGACGGGTGAGTAACGCGTGGGGATGTGCCCAATGGTGCGGAATAACCCAGGGAAACTTGGATTAATACCGCATGTGCCCTTCGGGGGAAAGATTTATCGCCATTGGATCAACCCGCGTCTGATTAGCTAGTTGGTGAGGTAAAGGCTCACCAAGGCGACGATCAGTAGCTGGTCTGAGAGGATGATCAGCCACACTGGGACTGAGACACGGCCCAGACTCCTACGGGAGGCAGCAGTGGGGAATATTGGACAATGGGCGCAAGCCTGATCCAGCCATGCCGCGTGAGTGATGAAGGCCTTAGGGTTGTAAAG…
GCF_000010525.1	Azorhizobium caulinodans ORS 571	AZC_RS03110	Xanthobacteraceae	Azorhizobium	Rhizobiales	CAACTTGAGAGTTTGATCCTGGCTCAGAGCGAACGCTGGCGGCAGGCCTAACACATGCAAGTCGAGCGCCCAGCAATGGGAGCGGCAGACGGGTGAGTAACGCGTGGGGATGTGCCCAATGGTGCGGAATAACCCAGGGAAACTTGGATTAATACCGCATGTGCCCTTCGGGGGAAAGATTTATCGCCATTGGATCAACCCGCGTCTGATTAGCTAGTTGGTGAGGTAAAGGCTCACCAAGGCGACGATCAGTAGCTGGTCTGAGAGGATGATCAGCCACACTGGGACTGAGACACGGCCCAGACTCCTACGGGAGGCAGCAGTGGGGAATATTGGACAATGGGCGCAAGCCTGATCCAGCCATGCCGCGTGAGTGATGAAGGCCTTAGGGTTGTAAAG…
GCF_000010525.1	Azorhizobium caulinodans ORS 571	AZC_RS21540	Xanthobacteraceae	Azorhizobium	Rhizobiales	CAACTTGAGAGTTTGATCCTGGCTCAGAGCGAACGCTGGCGGCAGGCCTAACACATGCAAGTCGAGCGCCCAGCAATGGGAGCGGCAGACGGGTGAGTAACGCGTGGGGATGTGCCCAATGGTGCGGAATAACCCAGGGAAACTTGGATTAATACCGCATGTGCCCTTCGGGGGAAAGATTTATCGCCATTGGATCAACCCGCGTCTGATTAGCTAGTTGGTGAGGTAAAGGCTCACCAAGGCGACGATCAGTAGCTGGTCTGAGAGGATGATCAGCCACACTGGGACTGAGACACGGCCCAGACTCCTACGGGAGGCAGCAGTGGGGAATATTGGACAATGGGCGCAAGCCTGATCCAGCCATGCCGCGTGAGTGATGAAGGCCTTAGGGTTGTAAAG…
GCF_000011365.1	Bradyrhizobium diazoefficiens USDA 110	BJA_RS07170	Xanthobacteraceae	Bradyrhizobium	Rhizobiales	TCCAACTTGAGAGTTTGATCCTGGCTCAGAGCGAACGCTGGCGGCAGGCTTAACACATGCAAGTCGAGCGGGCGTAGCAATACGTCAGCGGCAGACGGGTGAGTAACGCGTGGGAACGTACCTTTTGGTTCGGAACAACACAGGGAAACTTGTGCTAATACCGGATAAGCCCTTACGGGGAAAGATTTATCGCCGAAAGATCGGCCCGCGTCTGATTAGCTAGTTGGTAGGGTAACGGCCTACCAAGGCGACGATCAGTAGCTGGTCTGAGAGGATGATCAGCCACATTGGGACTGAGACACGGCCCAAACTCCTACGGGAGGCAGCAGTGGGGAATATTGGACAATGGGGGCAACCCTGATCCAGCCATGCCGCGTGAGTGATGAAGGCCCTAGGGTT…
GCF_000012725.1	Nitrobacter winogradskyi Nb-255	NWI_RS02945	Xanthobacteraceae	Nitrobacter	Rhizobiales	TCCAACTTGAGAGTTTGATCCTGGCTCAGAGCGAACGCTGGCGGCAGGCTTAACACATGCAAGTCGAACGGGCGTAGCAATACGTCAGTGGCAGACGGGTGAGTAACGCGTGGGAACGTACCTTTTGGTTCGGAACAACCCAGGGAAACTTGGGCTAATACCGGATAAGCCCTTACGGGGAAAGATTTATCGCCGAAAGATCGGCCCGCGTCTGATTAGCTTGTTGGTGAGGTAACGGCTCACCAAGGCGACGATCAGTAGCTGGTCTGAGAGGATGATCAGCCACATTGGGACTGAGACACGGCCCAAACTCCTACGGGAGGCAGCAGTGGGGAATATTGGACAATGGGCGCAAGCCTGATCCAGCCATGCCGCGTGAGTGATGAAGGCCCTAGGGTT…
GCF_000013885.1	Nitrobacter hamburgensis X14	NHAM_RS03415	Xanthobacteraceae	Nitrobacter	Rhizobiales	TCCAACTTGAGAGTTTGATCCTGGCTCAGAGCGAACGCTGGCGGCAGGCTTAACACATGCAAGTCGAACGGGCGTAGCAATACGTCAGTGGCAGACGGGTGAGTAACACGTGGGAACGTACCTTTTGGTTCGGAACAACTGAGGGAAACTTCAGCTAATACCGGATAAGCCCTTACGGGGAAAGATTTATCGCCGAAAGATCGGCCCGCGTCTGATTAGCTTGTTGGTGAGGTAATGGCTCACCAAGGCGACGATCAGTAGCTGGTCTGAGAGGATGATCAGCCACATTGGGACTGAGACACGGCCCAAACTCCTACGGGAGGCAGCAGTGGGGAATATTGGACAATGGGCGAAAGCCTGATCCAGCCATGCCGCGTGAGTGATGAAGGCCCTAGGGTT…
GCF_000015445.1	Bartonella bacilliformis KC583	BARBAKC583_RS01260	Rhizobiaceae	Bartonella	Rhizobiales	TCAACTTGAGAGTTTGATCCTGGCTCAGAACGAACGCTGGCGGCAGGCTTAACACATGCAAGTCGAGCGCACTCTTTTTGAGTGAGCGGCAGACGGGTGAGTAACGCGTGGGAATCTACCCATCTCTACGGAATAACACAGAGAAATTTGTGCTAATACCGTATACGTCCTTCGGGAGAAAGATTTATCGGAGATGGATGAGCCCGCGTTGGATTAGCTAGTTGGTGAGGTAACGGCCCACCAAGGCGACGATCCATAGCTGGTCTGAGAGGATGATCAGCCACACTGGGACTGAGACACGGCCCAGACTCCTACGGGAGGCAGCAGTGGGGAATATTGGACAATGGGGGCAACCCTGATCCAGCCATGCCGCGTGAGTGATGAAGGCCTTAGGGTTGT…
GCF_000015445.1	Bartonella bacilliformis KC583	BARBAKC583_RS05270	Rhizobiaceae	Bartonella	Rhizobiales	TCAACTTGAGAGTTTGATCCTGGCTCAGAACGAACGCTGGCGGCAGGCTTAACACATGCAAGTCGAGCGCACTCTTTTTGAGTGAGCGGCAGACGGGTGAGTAACGCGTGGGAATCTACCCATCTCTACGGAATAACACAGAGAAATTTGTGCTAATACCGTATACGTCCTTCGGGAGAAAGATTTATCGGAGATGGATGAGCCCGCGTTGGATTAGCTAGTTGGTGAGGTAACGGCCCACCAAGGCGACGATCCATAGCTGGTCTGAGAGGATGATCAGCCACACTGGGACTGAGACACGGCCCAGACTCCTACGGGAGGCAGCAGTGGGGAATATTGGACAATGGGGGCAACCCTGATCCAGCCATGCCGCGTGAGTGATGAAGGCCTTAGGGTTGT…
GCF_000016845.1	Brucella ovis ATCC 25840	BOV_RS08810	Rhizobiaceae	Brucella	Rhizobiales	TCAACTTGAGAGTTTGATCCTGGCTCAGAACGAACGCTGGCGGCAGGCTTAACACATGCAAGTCGAGCGCCCCGCAAGGGGAGCGGCAGACGGGTGAGTAACGCGTGGGAACGTACCATTTGCTACGGAATAACTCAGGGAAACTTGTGCTAATACCGTATGTGCCCTTCGGGGGAAAGATTTATCGGCAAATGATCGGCCCGCGTTGGATTAGCTAGTTGGTGGGGTAAAGGCTCACCAAGGCGACGATCCATAGCTGGTCTGAGAGGATGATCAGCCACACTGGGACTGAGACACGGCCCAGACTCCTACGGGAGGCAGCAGTGGGGAATATTGGACAATGGGCGCAAGCCTGATCCAGCCATGCCGCGTGAGTGATGAAGGCCCTAGGGTTGTAAA…
GCF_000016845.1	Brucella ovis ATCC 25840	BOV_RS15535	Rhizobiaceae	Brucella	Rhizobiales	TCAACTTGAGAGTTTGATCCTGGCTCAGAACGAACGCTGGCGGCAGGCTTAACACATGCAAGTCGAGCGCCCCGCAAGGGGAGCGGCAGACGGGTGAGTAACGCGTGGGAACGTACCATTTGCTACGGAATAACTCAGGGAAACTTGTGCTAATACCGTATGTGCCCTTCGGGGGAAAGATTTATCGGCAAATGATCGGCCCGCGTTGGATTAGCTAGTTGGTGGGGTAAAGGCTCACCAAGGCGACGATCCATAGCTGGTCTGAGAGGATGATCAGCCACACTGGGACTGAGACACGGCCCAGACTCCTACGGGAGGCAGCAGTGGGGAATATTGGACAATGGGCGCAAGCCTGATCCAGCCATGCCGCGTGAGTGATGAAGGCCCTAGGGTTGTAAA…
GCF_000016845.1	Brucella ovis ATCC 25840	BOV_RS07810	Rhizobiaceae	Brucella	Rhizobiales	TCAACTTGAGAGTTTGATCCTGGCTCAGAACGAACGCTGGCGGCAGGCTTAACACATGCAAGTCGAGCGCCCCGCAAGGGGAGCGGCAGACGGGTGAGTAACGCGTGGGAACGTACCATTTGCTACGGAATAACTCAGGGAAACTTGTGCTAATACCGTATGTGCCCTTCGGGGGAAAGATTTATCGGCAAATGATCGGCCCGCGTTGGATTAGCTAGTTGGTGGGGTAAAGGCTCACCAAGGCGACGATCCATAGCTGGTCTGAGAGGATGATCAGCCACACTGGGACTGAGACACGGCCCAGACTCCTACGGGAGGCAGCAGTGGGGAATATTGGACAATGGGCGCAAGCCTGATCCAGCCATGCCGCGTGAGTGATGAAGGCCCTAGGGTTGTAAA…
GCF_000017405.1	Ochrobactrum anthropi ATCC 49188	OANT_RS21525	Rhizobiaceae	Ochrobactrum	Rhizobiales	TCAACTTGAGAGTTTGATCCTGGCTCAGAACGAACGCTGGCGGCAGGCTTAACACATGCAAGTCGAGCGCCCCGCAAGGGGAGCGGCAGACGGGTGAGTAACGCGTGGGAACGTACCTTTTGCTACGGAATAACTCAGGGAAACTTGTGCTAATACCGTATGTGCCCTTCGGGGGAAAGATTTATCGGCAAAGGATCGGCCCGCGTTGGATTAGCTAGTTGGTGAGGTAAAGGCTCACCAAGGCGACGATCCATAGCTGGTCTGAGAGGATGATCAGCCACACTGGGACTGAGACACGGCCCAGACTCCTACGGGAGGCAGCAGTGGGGAATATTGGACAATGGGCGCAAGCCTGATCCAGCCATGCCGCGTGAGTGATGAAGGCCCTAGGGTTGTAAA…
GCF_000017405.1	Ochrobactrum anthropi ATCC 49188	OANT_RS05370	Rhizobiaceae	Ochrobactrum	Rhizobiales	TCAACTTGAGAGTTTGATCCTGGCTCAGAACGAACGCTGGCGGCAGGCTTAACACATGCAAGTCGAGCGCCCCGCAAGGGGAGCGGCAGACGGGTGAGTAACGCGTGGGAACGTACCTTTTGCTACGGAATAACTCAGGGAAACTTGTGCTAATACCGTATGTGCCCTTCGGGGGAAAGATTTATCGGCAAAGGATCGGCCCGCGTTGGATTAGCTAGTTGGTGAGGTAAAGGCTCACCAAGGCGACGATCCATAGCTGGTCTGAGAGGATGATCAGCCACACTGGGACTGAGACACGGCCCAGACTCCTACGGGAGGCAGCAGTGGGGAATATTGGACAATGGGCGCAAGCCTGATCCAGCCATGCCGCGTGAGTGATGAAGGCCCTAGGGTTGTAAA…
GCF_000017405.1	Ochrobactrum anthropi ATCC 49188	OANT_RS06565	Rhizobiaceae	Ochrobactrum	Rhizobiales	TCAACTTGAGAGTTTGATCCTGGCTCAGAACGAACGCTGGCGGCAGGCTTAACACATGCAAGTCGAGCGCCCCGCAAGGGGAGCGGCAGACGGGTGAGTAACGCGTGGGAACGTACCTTTTGCTACGGAATAACTCAGGGAAACTTGTGCTAATACCGTATGTGCCCTTCGGGGGAAAGATTTATCGGCAAAGGATCGGCCCGCGTTGGATTAGCTAGTTGGTGAGGTAAAGGCTCACCAAGGCGACGATCCATAGCTGGTCTGAGAGGATGATCAGCCACACTGGGACTGAGACACGGCCCAGACTCCTACGGGAGGCAGCAGTGGGGAATATTGGACAATGGGCGCAAGCCTGATCCAGCCATGCCGCGTGAGTGATGAAGGCCCTAGGGTTGTAAA…
GCF_000017405.1	Ochrobactrum anthropi ATCC 49188	OANT_RS16210	Rhizobiaceae	Ochrobactrum	Rhizobiales	TCAACTTGAGAGTTTGATCCTGGCTCAGAACGAACGCTGGCGGCAGGCTTAACACATGCAAGTCGAGCGCCCCGCAAGGGGAGCGGCAGACGGGTGAGTAACGCGTGGGAACGTACCTTTTGCTACGGAATAACTCAGGGAAACTTGTGCTAATACCGTATGTGCCCTTCGGGGGAAAGATTTATCGGCAAAGGATCGGCCCGCGTTGGATTAGCTAGTTGGTGAGGTAAAGGCTCACCAAGGCGACGATCCATAGCTGGTCTGAGAGGATGATCAGCCACACTGGGACTGAGACACGGCCCAGACTCCTACGGGAGGCAGCAGTGGGGAATATTGGACAATGGGCGCAAGCCTGATCCAGCCATGCCGCGTGAGTGATGAAGGCCCTAGGGTTGTAAA…
GCF_000017565.1	Parvibaculum lavamentivorans DS-1	PLAV_RS08875	Parvibaculaceae	Parvibaculum	Parvibaculales	TCAACTTGAGAGTTTGATCCTGGCTCAGAACGAACGCTGGCGGCAGGCTTAACACATGCAAGTCGAACGCCCTCTTCGGAGGGAGTGGCAGACGGGTGAGTAACACGTGGGAACCTACCTAGGGGTACGGAATAACTCGGGGAAACTCGTGCTAATACCGTATACGACCTTCGGGTGAAAGATTTATCGCCCCTAGATGGGCCCGCGCTGGATTAGCTAGTTGGTGGGGTAAAAGCCTACCAAGGCGACGATCCATAGCTGGTCTGAGAGGATGATCAGCCACACTGGGACTGAGACACGGCCCAGACTCCTACGGGAGGCAGCAGTGGGGAATCTTGGACAATGGGGGAAACCCTGATCCAGCCATGCCGCGTGAGTGATGAAGGCCTTAGGGTTGTA…
GCF_000017645.1	Xanthobacter autotrophicus Py2	XAUT_RS04545	Xanthobacteraceae	Xanthobacter	Rhizobiales	AACTTGAGAGTTTGATCCTGGCTCAGAGCGAACGCTGGCGGCAGGCCTAACACATGCAAGTCGAGCGCCCAGCAATGGGAGCGGCAGACGGGTGAGTAACACGTGGGGATCTACCCAATGGTACGGAATAACCCAGGGAAACTTGGACTAATACCGTATGTGCCCTTCGGGGGAAAGATTTATCGCCATTGGATGAACCCGCGTCGGATTAGCTAGTTGGTGAGGTAAAGGCTCACCAAGGCGACGATCCGTAGCTGGTCTGAGAGGATGATCAGCCACACTGGGACTGAGACACGGCCCAGACTCCTACGGGAGGCAGCAGTGGGGAATATTGGACAATGGGCGCAAGCCTGATCCAGCCATGCCGCGTGAGTGATGAAGGCCTTAGGGTTGTAAAGC…
GCF_000017645.1	Xanthobacter autotrophicus Py2	XAUT_RS09565	Xanthobacteraceae	Xanthobacter	Rhizobiales	AACTTGAGAGTTTGATCCTGGCTCAGAGCGAACGCTGGCGGCAGGCCTAACACATGCAAGTCGAGCGCCCAGCAATGGGAGCGGCAGACGGGTGAGTAACACGTGGGGATCTACCCAATGGTACGGAATAACCCAGGGAAACTTGGACTAATACCGTATGTGCCCTTCGGGGGAAAGATTTATCGCCATTGGATGAACCCGCGTCGGATTAGCTAGTTGGTGAGGTAAAGGCTCACCAAGGCGACGATCCGTAGCTGGTCTGAGAGGATGATCAGCCACACTGGGACTGAGACACGGCCCAGACTCCTACGGGAGGCAGCAGTGGGGAATATTGGACAATGGGCGCAAGCCTGATCCAGCCATGCCGCGTGAGTGATGAAGGCCTTAGGGTTGTAAAGC…
GCF_000018525.1	Brucella canis ATCC 23365	BCAN_RS15345	Rhizobiaceae	Brucella	Rhizobiales	TTCAACTTGAGAGTTTGATCCTGGCTCAGAACGAACGCTGGCGGCAGGCTTAACACATGCAAGTCGAGCGCCCCGCAAGGGGAGCGGCAGACGGGTGAGTAACGCGTGGGAACGTACCATTTGCTACGGAATAACTCAGGGAAACTTGTGCTAATACCGTATGTGCCCTTCGGGGGAAAGATTTATCGGCAAATGATCGGCCCGCGTTGGATTAGCTAGTTGGTGGGGTAAAGGCTCACCAAGGCGACGATCCATAGCTGGTCTGAGAGGATGATCAGCCACACTGGGACTGAGACACGGCCCAGACTCCTACGGGAGGCAGCAGTGGGGAATATTGGACAATGGGCGCAAGCCTGATCCAGCCATGCCGCGTGAGTGATGAAGGCCCTAGGGTTGTAA…
GCF_000018525.1	Brucella canis ATCC 23365	BCAN_RS07620	Rhizobiaceae	Brucella	Rhizobiales	TTCAACTTGAGAGTTTGATCCTGGCTCAGAACGAACGCTGGCGGCAGGCTTAACACATGCAAGTCGAGCGCCCCGCAAGGGGAGCGGCAGACGGGTGAGTAACGCGTGGGAACGTACCATTTGCTACGGAATAACTCAGGGAAACTTGTGCTAATACCGTATGTGCCCTTCGGGGGAAAGATTTATCGGCAAATGATCGGCCCGCGTTGGATTAGCTAGTTGGTGGGGTAAAGGCTCACCAAGGCGACGATCCATAGCTGGTCTGAGAGGATGATCAGCCACACTGGGACTGAGACACGGCCCAGACTCCTACGGGAGGCAGCAGTGGGGAATATTGGACAATGGGCGCAAGCCTGATCCAGCCATGCCGCGTGAGTGATGAAGGCCCTAGGGTTGTAA…
GCF_000018525.1	Brucella canis ATCC 23365	BCAN_RS08605	Rhizobiaceae	Brucella	Rhizobiales	TTCAACTTGAGAGTTTGATCCTGGCTCAGAACGAACGCTGGCGGCAGGCTTAACACATGCAAGTCGAGCGCCCCGCAAGGGGAGCGGCAGACGGGTGAGTAACGCGTGGGAACGTACCATTTGCTACGGAATAACTCAGGGAAACTTGTGCTAATACCGTATGTGCCCTTCGGGGGAAAGATTTATCGGCAAATGATCGGCCCGCGTTGGATTAGCTAGTTGGTGGGGTAAAGGCTCACCAAGGCGACGATCCATAGCTGGTCTGAGAGGATGATCAGCCACACTGGGACTGAGACACGGCCCAGACTCCTACGGGAGGCAGCAGTGGGGAATATTGGACAATGGGCGCAAGCCTGATCCAGCCATGCCGCGTGAGTGATGAAGGCCCTAGGGTTGTAA…
GCF_000019725.1	Methylobacterium radiotolerans JCM 2831	MRAD2831_RS53840	Beijerinckiaceae	Methylobacterium-Methylorubrum	Rhizobiales	GTGATCGGCCAGATCAATCTCTTCAACGTGAGAGTTTGATCCTGGCTCAGAGCGAACGCTGGCGGCAGGCTTAACACATGCAAGTCGAGCGGGCCCTTCGGGGTCAGCGGCGGACGGGTGAGTAACGCGTGGGAACGTGCCTTCTGGTTCGGAATAACCCTGGGAAACTAGGGCTAATACCGGATACGCCCTTTTGGGGAAAGGTTTACTGCCGGAAGATCGGCCCGCGTCTGATTAGCTAGTTGGTGGGGTAACGGCCTACCAAGGCGACGATCAGTAGCTGGTCTGAGAGGATGATCAGCCACACTGGGACTGAGACACGGCCCAGACTCCTACGGGAGGCAGCAGTGGGGAATATTGGACAATGGGCGCAAGCCTGATCCAGCCATGCCGCGTGAG…
GCF_000019725.1	Methylobacterium radiotolerans JCM 2831	MRAD2831_RS39465	Beijerinckiaceae	Methylobacterium-Methylorubrum	Rhizobiales	GTGATCGGCCAGATCAATCTCTTCAACGTGAGAGTTTGATCCTGGCTCAGAGCGAACGCTGGCGGCAGGCTTAACACATGCAAGTCGAGCGGGCCCTTCGGGGTCAGCGGCGGACGGGTGAGTAACGCGTGGGAACGTGCCTTCTGGTTCGGAATAACCCTGGGAAACTAGGGCTAATACCGGATACGCCCTTTTGGGGAAAGGTTTACTGCCGGAAGATCGGCCCGCGTCTGATTAGCTAGTTGGTGGGGTAACGGCCTACCAAGGCGACGATCAGTAGCTGGTCTGAGAGGATGATCAGCCACACTGGGACTGAGACACGGCCCAGACTCCTACGGGAGGCAGCAGTGGGGAATATTGGACAATGGGCGCAAGCCTGATCCAGCCATGCCGCGTGAG…
GCF_000019725.1	Methylobacterium radiotolerans JCM 2831	MRAD2831_RS43840	Beijerinckiaceae	Methylobacterium-Methylorubrum	Rhizobiales	GTGATCGGCCAGATCAATCTCTTCAACGTGAGAGTTTGATCCTGGCTCAGAGCGAACGCTGGCGGCAGGCTTAACACATGCAAGTCGAGCGGGCCCTTCGGGGTCAGCGGCGGACGGGTGAGTAACGCGTGGGAACGTGCCTTCTGGTTCGGAATAACCCTGGGAAACTAGGGCTAATACCGGATACGCCCTTTTGGGGAAAGGTTTACTGCCGGAAGATCGGCCCGCGTCTGATTAGCTAGTTGGTGGGGTAACGGCCTACCAAGGCGACGATCAGTAGCTGGTCTGAGAGGATGATCAGCCACACTGGGACTGAGACACGGCCCAGACTCCTACGGGAGGCAGCAGTGGGGAATATTGGACAATGGGCGCAAGCCTGATCCAGCCATGCCGCGTGAG…
GCF_000019725.1	Methylobacterium radiotolerans JCM 2831	MRAD2831_RS49280	Beijerinckiaceae	Methylobacterium-Methylorubrum	Rhizobiales	GTGATCGGCCAGATCAATCTCTTCAACGTGAGAGTTTGATCCTGGCTCAGAGCGAACGCTGGCGGCAGGCTTAACACATGCAAGTCGAGCGGGCCCTTCGGGGTCAGCGGCGGACGGGTGAGTAACGCGTGGGAACGTGCCTTCTGGTTCGGAATAACCCTGGGAAACTAGGGCTAATACCGGATACGCCCTTTTGGGGAAAGGTTTACTGCCGGAAGATCGGCCCGCGTCTGATTAGCTAGTTGGTGGGGTAACGGCCTACCAAGGCGACGATCAGTAGCTGGTCTGAGAGGATGATCAGCCACACTGGGACTGAGACACGGCCCAGACTCCTACGGGAGGCAGCAGTGGGGAATATTGGACAATGGGCGCAAGCCTGATCCAGCCATGCCGCGTGAG…
GCF_000019725.1	Methylobacterium radiotolerans JCM 2831	MRAD2831_RS61125	Beijerinckiaceae	Methylobacterium-Methylorubrum	Rhizobiales	TTGTGATCAGCTTAGATCAATCTCTTCAATGTGAGAGTTTGATCCTGGCTCAGAGCGAACGCTGGCGGCAGGCTTAACACATGCAAGTCGAGCGGGCCCTTCGGGGTCAGCGGCGGACGGGTGAGTAACGCGTGGGAACGTGCCTTCTGGTTCGGAATAACCCTGGGAAACTAGGGCTAATACCGGATACGCCCTTTTGGGGAAAGGTTTACTGCCGGAAGATCGGCCCGCGTCTGATTAGCTAGTTGGTGGGGTAACGGCCTACCAAGGCGACGATCAGTAGCTGGTCTGAGAGGATGATCAGCCACACTGGGACTGAGACACGGCCCAGACTCCTACGGGAGGCAGCAGTGGGGAATATTGGACAATGGGCGCAAGCCTGATCCAGCCATGCCGCGT…
GCF_000019725.1	Methylobacterium radiotolerans JCM 2831	MRAD2831_RS62805	Beijerinckiaceae	Methylobacterium-Methylorubrum	Rhizobiales	TTGTGATCAGCTTAGATCAATCTCTTCAACGTGAGAGTTTGATCCTGGCTCAGAGCGAACGCTGGCGGCAGGCTTAACACATGCAAGTCGAGCGGGCCCTTCGGGGTCAGCGGCGGACGGGTGAGTAACGCGTGGGAACGTGCCTTCTGGTTCGGAATAACCCTGGGAAACTAGGGCTAATACCGGATACGCCCTTTTGGGGAAAGGTTTACTGCCGGAAGATCGGCCCGCGTCTGATTAGCTAGTTGGTGGGGTAACGGCCTACCAAGGCGACGATCAGTAGCTGGTCTGAGAGGATGATCAGCCACACTGGGACTGAGACACGGCCCAGACTCCTACGGGAGGCAGCAGTGGGGAATATTGGACAATGGGCGCAAGCCTGATCCAGCCATGCCGCGT…
GCF_000019845.1	Beijerinckia indica subsp. indica ATCC 9039	BIND_RS17585	Beijerinckiaceae	Beijerinckia	Rhizobiales	AACTTGAGAGTTTGATCCTGGCTCAGAACGAACGCTGGCGGCAGGCCTAACACATGCAAGTCGAACGCTGTAGCAATACGGAGTGGCAGACGGGTGAGTAACACGTGGGAACATACCCTTTGGTTCGGAATAACTCAGGGAAACTTGGGCTAATACCGGATACGCCCTACGGGGGAAAGATTTATTGCCGAAGGATTGGCCCGCGTCTGATTAGCTAGTTGGTGAGGTAATGGCTCACCAAGGCGACGATCAGTAGCTGGTCTGAGAGGATGATCAGCCACATTGGGACTGAGACACGGCCCAAACTCCTACGGGAGGCAGCAGTGGGGAATATTGGACAATGGGCGCAAGCCTGATCCAGCCATGCCGCGTGAGTGATGAAGGCCTTAGGGTTGTAAA…
GCF_000019845.1	Beijerinckia indica subsp. indica ATCC 9039	BIND_RS03100	Beijerinckiaceae	Beijerinckia	Rhizobiales	AACTTGAGAGTTTGATCCTGGCTCAGAACGAACGCTGGCGGCAGGCCTAACACATGCAAGTCGAACGCTGTAGCAATACGGAGTGGCAGACGGGTGAGTAACACGTGGGAACATACCCTTTGGTTCGGAATAACTCAGGGAAACTTGGGCTAATACCGGATACGCCCTACGGGGGAAAGATTTATTGCCGAAGGATTGGCCCGCGTCTGATTAGCTAGTTGGTGAGGTAATGGCTCACCAAGGCGACGATCAGTAGCTGGTCTGAGAGGATGATCAGCCACATTGGGACTGAGACACGGCCCAAACTCCTACGGGAGGCAGCAGTGGGGAATATTGGACAATGGGCGCAAGCCTGATCCAGCCATGCCGCGTGAGTGATGAAGGCCTTAGGGTTGTAAA…
GCF_000019845.1	Beijerinckia indica subsp. indica ATCC 9039	BIND_RS15205	Beijerinckiaceae	Beijerinckia	Rhizobiales	AACTTGAGAGTTTGATCCTGGCTCAGAACGAACGCTGGCGGCAGGCCTAACACATGCAAGTCGAACGCCGTAGCAATACGGAGTGGCAGACGGGTGAGTAACACGTGGGAACATACCCTTTGGTTCGGAATAACTCAGGGAAACTTGGGCTAATACCGGATACGCCCTACGGGGGAAAGATTTATTGCCGAAGGATTGGCCCGCGTCTGATTAGCTAGTTGGTGAGGTAATGGCTCACCAAGGCGACGATCAGTAGCTGGTCTGAGAGGATGATCAGCCACATTGGGACTGAGACACGGCCCAAACTCCTACGGGAGGCAGCAGTGGGGAATATTGGACAATGGGCGCAAGCCTGATCCAGCCATGCCGCGTGAGTGATGAAGGCCTTAGGGTTGTAAA…
GCF_000019945.1	Methylorubrum populi BJ001	MPOP_RS06610	Beijerinckiaceae	Methylobacterium-Methylorubrum	Rhizobiales	CTCCGTTTATGTTGTGATCAGCTGAGATCAACTCTTCAACTTGAGAGTTTGATCCTGGCTCAGAGCGAACGCTGGCGGCAGGCTTAACACATGCAAGTCGAACGGGCTTCTTCGGAAGTCAGTGGCAGACGGGTGAGTAACACGTGGGAACGTGCCCTTCGGTTCGGAATAACTCAGGGAAACTTGAGCTAATACCGGATACGCCCTTATGGGGAAAGGTTTACTGCCGAAGGATCGGCCCGCGTCTGATTAGCTTGTTGGTGGGGTAACGGCCTACCAAGGCGACGATCAGTAGCTGGTCTGAGAGGATGATCAGCCACACTGGGACTGAGACACGGCCCAGACTCCTACGGGAGGCAGCAGTGGGGAATATTGGACAATGGGCGCAAGCCTGATCCA…
GCF_000019945.1	Methylorubrum populi BJ001	MPOP_RS02790	Beijerinckiaceae	Methylobacterium-Methylorubrum	Rhizobiales	CTCCGTTTATGTTGTGATCAGCTGAGATCAACTCTTCAACTTGAGAGTTTGATCCTGGCTCAGAGCGAACGCTGGCGGCAGGCTTAACACATGCAAGTCGAACGGGCTTCTTCGGAAGTCAGTGGCAGACGGGTGAGTAACACGTGGGAACGTGCCCTTCGGTTCGGAATAACTCAGGGAAACTTGAGCTAATACCGGATACGCCCTTACGGGGAAAGGTTTACTGCCGAAGGATCGGCCCGCGTCTGATTAGCTTGTTGGTGGGGTAACGGCCTACCAAGGCGACGATCAGTAGCTGGTCTGAGAGGATGATCAGCCACACTGGGACTGAGACACGGCCCAGACTCCTACGGGAGGCAGCAGTGGGGAATATTGGACAATGGGCGCAAGCCTGATCCA…
GCF_000019945.1	Methylorubrum populi BJ001	MPOP_RS03580	Beijerinckiaceae	Methylobacterium-Methylorubrum	Rhizobiales	CTCCGTTTATGTTGTGATCAGCTGAGATCAACTCTTCAACTTGAGAGTTTGATCCTGGCTCAGAGCGAACGCTGGCGGCAGGCTTAACACATGCAAGTCGAACGGGCTTCTTCGGAAGTCAGTGGCAGACGGGTGAGTAACACGTGGGAACGTGCCCTTCGGTTCGGAATAACTCAGGGAAACTTGAGCTAATACCGGATACGCCCTTACGGGGAAAGGTTTACTGCCGAAGGATCGGCCCGCGTCTGATTAGCTTGTTGGTGGGGTAACGGCCTACCAAGGCGACGATCAGTAGCTGGTCTGAGAGGATGATCAGCCACACTGGGACTGAGACACGGCCCAGACTCCTACGGGAGGCAGCAGTGGGGAATATTGGACAATGGGCGCAAGCCTGATCCA…
GCF_000019945.1	Methylorubrum populi BJ001	MPOP_RS04810	Beijerinckiaceae	Methylobacterium-Methylorubrum	Rhizobiales	CTCCGTTTATGTTGTGATCAGCTGAGATCAACTCTTCAACTTGAGAGTTTGATCCTGGCTCAGAGCGAACGCTGGCGGCAGGCTTAACACATGCAAGTCGAACGGGCTTCTTCGGAAGTCAGTGGCAGACGGGTGAGTAACACGTGGGAACGTGCCCTTCGGTTCGGAATAACTCAGGGAAACTTGAGCTAATACCGGATACGCCCTTACGGGGAAAGGTTTACTGCCGAAGGATCGGCCCGCGTCTGATTAGCTTGTTGGTGGGGTAACGGCCTACCAAGGCGACGATCAGTAGCTGGTCTGAGAGGATGATCAGCCACACTGGGACTGAGACACGGCCCAGACTCCTACGGGAGGCAGCAGTGGGGAATATTGGACAATGGGCGCAAGCCTGATCCA…
GCF_000019945.1	Methylorubrum populi BJ001	MPOP_RS06725	Beijerinckiaceae	Methylobacterium-Methylorubrum	Rhizobiales	CTCCGTTTATGTTGTGATCAGCTGAGATCAACTCTTCAACTTGAGAGTTTGATCCTGGCTCAGAGCGAACGCTGGCGGCAGGCTTAACACATGCAAGTCGAACGGGCTTCTTCGGAAGTCAGTGGCAGACGGGTGAGTAACACGTGGGAACGTGCCCTTCGGTTCGGAATAACTCAGGGAAACTTGAGCTAATACCGGATACGCCCTTACGGGGAAAGGTTTACTGCCGAAGGATCGGCCCGCGTCTGATTAGCTTGTTGGTGGGGTAACGGCCTACCAAGGCGACGATCAGTAGCTGGTCTGAGAGGATGATCAGCCACACTGGGACTGAGACACGGCCCAGACTCCTACGGGAGGCAGCAGTGGGGAATATTGGACAATGGGCGCAAGCCTGATCCA…
GCF_000021365.1	Oligotropha carboxidovorans OM5	OCAR_RS03690	Xanthobacteraceae	Oligotropha	Rhizobiales	TCCAACTTGAGAGTTTGATCCTGGCTCAGAGCGAACGCTGGCGGCAGGCTTAACACATGCAAGTCGAACGGGCGTAGCAATACGTCAGTGGCAGACGGGTGAGTATCGCGTGGGAACGTACCTTTTGGTTCGGAACAACACAGGGAAACTTGTGCTAATACCGAATAAGCCCTTACGGGGAAAGATTTATCGCCGAAAGATCGGCCCGCGTCTGATTAGCTTGTTGGTGAGGTAACGGCTCACCAAGGCGACGATCAGTAGCTGGTCTGAGAGGATGATCAGCCACATTGGGACTGAGACACGGCCCAAACTCCTACGGGAGGCAGCAGTGGGGAATATTGGACAATGGGCGAAAGCCTGATCCAGCCATGCCGCGTGAGTGATGAAGGCCCTAGGGTT…
GCF_000021745.1	Methylocella silvestris BL2	MSIL_RS11545	Beijerinckiaceae	Methylocella	Rhizobiales	CAACTTGAGAGTTTGATCCTGGCTCAGAACGAACGCTGGCGGCAGGCCTAACACATGCAAGTCGAACGCTGTAGCAATACAGAGTGGCAGACGGGTGAGTAACACGTGGGAACATACCCTTCGGTTCGGAACAACTCAGGGAAACTTGAGCTAATACCGGATACGCCCTTTGGGGGAAAGATTTATCGCCGAAGGATTGGCCCGCGTCTGATTAGCTAGTTGGCGGGGTAATGGCCCACCAAGGCGACGATCAGTAGCTGGTCTGAGAGGATGATCAGCCACATTGGGACTGAGACACGGCCCAAACTCCTACGGGAGGCAGCAGTGGGGAATATTGGACAATGGGCGCAAGCCTGATCCAGCCATGCCGCGTGAGTGATGAAGGCCTTAGGGTTGTAA…
GCF_000021745.1	Methylocella silvestris BL2	MSIL_RS09050	Beijerinckiaceae	Methylocella	Rhizobiales	CAACTTGAGAGTTTGATCCTGGCTCAGAACGAACGCTGGCGGCAGGCCTAACACATGCAAGTCGAACGCTGTAGCAATACAGAGTGGCAGACGGGTGAGTAACACGTGGGAACATACCCTTCGGTTCGGAACAACTCAGGGAAACTTGAGCTAATACCGGATACGCCCTTTGGGGGAAAGATTTATCGCCGAAGGATTGGCCCGCGTCTGATTAGCTAGTTGGCGGGGTAATGGCCCACCAAGGCGACGATCAGTAGCTGGTCTGAGAGGATGATCAGCCACATTGGGACTGAGACACGGCCCAAACTCCTACGGGAGGCAGCAGTGGGGAATATTGGACAATGGGCGCAAGCCTGATCCAGCCATGCCGCGTGAGTGATGAAGGCCTTAGGGTTGTAA…
GCF_000021845.1	Methylorubrum extorquens CM4	MCHL_RS07540	Beijerinckiaceae	Methylobacterium-Methylorubrum	Rhizobiales	CTCCGTTTATGTTGTGATCAGCTGAGATCAACTCTTCAACTTGAGAGTTTGATCCTGGCTCAGAGCGAACGCTGGCGGCAGGCTTAACACATGCAAGTCGAACGGGCACCTTCGGGTGTCAGTGGCAGACGGGTGAGTAACACGTGGGAACGTACCCTTCGGTTCGGAATAACTCAGGGAAACTTGAGCTAATACCGGATACGCCCTTATGGGGAAAGGTTTACTGCCGAAGGATCGGCCCGCGTCTGATTAGCTTGTTGGTGGGGTAACGGCCTACCAAGGCGACGATCAGTAGCTGGTCTGAGAGGATGATCAGCCACACTGGGACTGAGACACGGCCCAGACTCCTACGGGAGGCAGCAGTGGGGAATATTGGACAATGGGCGCAAGCCTGATCCA…
GCF_000021845.1	Methylorubrum extorquens CM4	MCHL_RS02790	Beijerinckiaceae	Methylobacterium-Methylorubrum	Rhizobiales	CTCCGTTTATGTTGTGATCAGCTGAGATCAACTCTTCAACTTGAGAGTTTGATCCTGGCTCAGAGCGAACGCTGGCGGCAGGCTTAACACATGCAAGTCGAACGGGCACCTTCGGGTGTCAGTGGCAGACGGGTGAGTAACACGTGGGAACGTACCCTTCGGTTCGGAATAACTCAGGGAAACTTGAGCTAATACCGGATACGCCCTTATGGGGAAAGGTTTACTGCCGAAGGATCGGCCCGCGTCTGATTAGCTTGTTGGTGGGGTAACGGCCTACCAAGGCGACGATCAGTAGCTGGTCTGAGAGGATGATCAGCCACACTGGGACTGAGACACGGCCCAGACTCCTACGGGAGGCAGCAGTGGGGAATATTGGACAATGGGCGCAAGCCTGATCCA…
GCF_000021845.1	Methylorubrum extorquens CM4	MCHL_RS03605	Beijerinckiaceae	Methylobacterium-Methylorubrum	Rhizobiales	CTCCGTTTATGTTGTGATCAGCTGAGATCAACTCTTCAACTTGAGAGTTTGATCCTGGCTCAGAGCGAACGCTGGCGGCAGGCTTAACACATGCAAGTCGAACGGGCACCTTCGGGTGTCAGTGGCAGACGGGTGAGTAACACGTGGGAACGTACCCTTCGGTTCGGAATAACTCAGGGAAACTTGAGCTAATACCGGATACGCCCTTATGGGGAAAGGTTTACTGCCGAAGGATCGGCCCGCGTCTGATTAGCTTGTTGGTGGGGTAACGGCCTACCAAGGCGACGATCAGTAGCTGGTCTGAGAGGATGATCAGCCACACTGGGACTGAGACACGGCCCAGACTCCTACGGGAGGCAGCAGTGGGGAATATTGGACAATGGGCGCAAGCCTGATCCA…
GCF_000021845.1	Methylorubrum extorquens CM4	MCHL_RS03715	Beijerinckiaceae	Methylobacterium-Methylorubrum	Rhizobiales	CTCCGTTTATGTTGTGATCAGCTGAGATCAACTCTTCAACTTGAGAGTTTGATCCTGGCTCAGAGCGAACGCTGGCGGCAGGCTTAACACATGCAAGTCGAACGGGCACCTTCGGGTGTCAGTGGCAGACGGGTGAGTAACACGTGGGAACGTACCCTTCGGTTCGGAATAACTCAGGGAAACTTGAGCTAATACCGGATACGCCCTTATGGGGAAAGGTTTACTGCCGAAGGATCGGCCCGCGTCTGATTAGCTTGTTGGTGGGGTAACGGCCTACCAAGGCGACGATCAGTAGCTGGTCTGAGAGGATGATCAGCCACACTGGGACTGAGACACGGCCCAGACTCCTACGGGAGGCAGCAGTGGGGAATATTGGACAATGGGCGCAAGCCTGATCCA…
GCF_000021845.1	Methylorubrum extorquens CM4	MCHL_RS05505	Beijerinckiaceae	Methylobacterium-Methylorubrum	Rhizobiales	CTCCGTTTATGTTGTGATCAGCTGAGATCAACTCTTCAACTTGAGAGTTTGATCCTGGCTCAGAGCGAACGCTGGCGGCAGGCTTAACACATGCAAGTCGAACGGGCACCTTCGGGTGTCAGTGGCAGACGGGTGAGTAACACGTGGGAACGTACCCTTCGGTTCGGAATAACTCAGGGAAACTTGAGCTAATACCGGATACGCCCTTATGGGGAAAGGTTTACTGCCGAAGGATCGGCCCGCGTCTGATTAGCTTGTTGGTGGGGTAACGGCCTACCAAGGCGACGATCAGTAGCTGGTCTGAGAGGATGATCAGCCACACTGGGACTGAGACACGGCCCAGACTCCTACGGGAGGCAGCAGTGGGGAATATTGGACAATGGGCGCAAGCCTGATCCA…
GCF_000022085.1	Methylobacterium nodulans ORS 2060	MNOD_RS10060	Beijerinckiaceae	Methylobacterium-Methylorubrum	Rhizobiales	TTGTGATCGAGCGTTTTGAGGTCAGCTCTTCAAGGTGAGAGTTTGATCCTGGCTCAGAGCGAACGCTGGCGGCAGGCTTAACACATGCAAGTCGAGCGGGCCCTGCGGGGTCAGCGGCAGACGGGTGAGTAACGCGTGGGAACGTGCCCTTCGGTTCGGAACAACCCTGGGAAACTAGGGCTAATACCGGATACGTCCGCAAGGAGAAAGGCTTGACTGCCGAAGGATCGGCCCGCGTCTGATTAGCTGGTTGGTGGGGTAACGGCTCACCAAGGCGACGATCAGTAGCTGGTCTGAGAGGATGATCAGCCACACTGGGACTGAGACACGGCCCAGACTCCTACGGGAGGCAGCAGTGGGGAATATTGGACAATGGGCGCAAGCCTGATCCAGCCATGC…
GCF_000022085.1	Methylobacterium nodulans ORS 2060	MNOD_RS17525	Beijerinckiaceae	Methylobacterium-Methylorubrum	Rhizobiales	TTGTGATCGAGCGTTTTGAGGTCAGCTCTTCAAGGTGAGAGTTTGATCCTGGCTCAGAGCGAACGCTGGCGGCAGGCTTAACACATGCAAGTCGAGCGGGCCCTGCGGGGTCAGCGGCAGACGGGTGAGTAACGCGTGGGAACGTGCCCTTCGGTTCGGAACAACCCTGGGAAACTAGGGCTAATACCGGATACGTCCGCAAGGAGAAAGGCTTGACTGCCGAAGGATCGGCCCGCGTCTGATTAGCTGGTTGGTGGGGTAACGGCTCACCAAGGCGACGATCAGTAGCTGGTCTGAGAGGATGATCAGCCACACTGGGACTGAGACACGGCCCAGACTCCTACGGGAGGCAGCAGTGGGGAATATTGGACAATGGGCGCAAGCCTGATCCAGCCATGC…
GCF_000022085.1	Methylobacterium nodulans ORS 2060	MNOD_RS17650	Beijerinckiaceae	Methylobacterium-Methylorubrum	Rhizobiales	TTGTGATCGAGCGTTTTGAGGTCAGCTCTTCAAGGTGAGAGTTTGATCCTGGCTCAGAGCGAACGCTGGCGGCAGGCTTAACACATGCAAGTCGAGCGGGCCCTGCGGGGTCAGCGGCAGACGGGTGAGTAACGCGTGGGAACGTGCCCTTCGGTTCGGAACAACCCTGGGAAACTAGGGCTAATACCGGATACGTCCGCAAGGAGAAAGGCTTGACTGCCGAAGGATCGGCCCGCGTCTGATTAGCTGGTTGGTGGGGTAACGGCTCACCAAGGCGACGATCAGTAGCTGGTCTGAGAGGATGATCAGCCACACTGGGACTGAGACACGGCCCAGACTCCTACGGGAGGCAGCAGTGGGGAATATTGGACAATGGGCGCAAGCCTGATCCAGCCATGC…
GCF_000022085.1	Methylobacterium nodulans ORS 2060	MNOD_RS00935	Beijerinckiaceae	Methylobacterium-Methylorubrum	Rhizobiales	TTGTGATCGAGCGTTTTGAGGTCAGCTCTTCAAGGTGAGAGTTTGATCCTGGCTCAGAGCGAACGCTGGCGGCAGGCTTAACACATGCAAGTCGAGCGGGCCCTGCGGGGTCAGCGGCAGACGGGTGAGTAACGCGTGGGAACGTGCCCTTCGGTTCGGAACAACCCTGGGAAACTAGGGCTAATACCGGATACGTCCGCAAGGAGAAAGGCTTGACTGCCGAAGGATCGGCCCGCGTCTGATTAGCTGGTTGGTGGGGTAACGGCTCACCAAGGCGACGATCAGTAGCTGGTCTGAGAGGATGATCAGCCACACTGGGACTGAGACACGGCCCAGACTCCTACGGGAGGCAGCAGTGGGGAATATTGGACAATGGGCGCAAGCCTGATCCAGCCATGC…
GCF_000022085.1	Methylobacterium nodulans ORS 2060	MNOD_RS27845	Beijerinckiaceae	Methylobacterium-Methylorubrum	Rhizobiales	TTGTGATCGAGCGTTTTGAGGTCAGCTCTTCAAGGTGAGAGTTTGATCCTGGCTCAGAGCGAACGCTGGCGGCAGGCTTAACACATGCAAGTCGAGCGGGCCCTGCGGGGTCAGCGGCAGACGGGTGAGTAACGCGTGGGAACGTGCCCTTCGGTTCGGAACAACCCTGGGAAACTAGGGCTAATACCGGATACGTCCGCAAGGAGAAAGGCTTGACTGCCGAAGGATCGGCCCGCGTCTGATTAGCTGGTTGGTGGGGTAACGGCTCACCAAGGCGACGATCAGTAGCTGGTCTGAGAGGATGATCAGCCACACTGGGACTGAGACACGGCCCAGACTCCTACGGGAGGCAGCAGTGGGGAATATTGGACAATGGGCGCAAGCCTGATCCAGCCATGC…
GCF_000022085.1	Methylobacterium nodulans ORS 2060	MNOD_RS31710	Beijerinckiaceae	Methylobacterium-Methylorubrum	Rhizobiales	TTGTGATCGAGCGTTTTGAGGTCAGCTCTTCAAGGTGAGAGTTTGATCCTGGCTCAGAGCGAACGCTGGCGGCAGGCTTAACACATGCAAGTCGAGCGGGCCCTGCGGGGTCAGCGGCAGACGGGTGAGTAACGCGTGGGAACGTGCCCTTCGGTTCGGAACAACCCTGGGAAACTAGGGCTAATACCGGATACGTCCGCAAGGAGAAAGGCTTGACTGCCGAAGGATCGGCCCGCGTCTGATTAGCTGGTTGGTGGGGTAACGGCTCACCAAGGCGACGATCAGTAGCTGGTCTGAGAGGATGATCAGCCACACTGGGACTGAGACACGGCCCAGACTCCTACGGGAGGCAGCAGTGGGGAATATTGGACAATGGGCGCAAGCCTGATCCAGCCATGC…
GCF_000022085.1	Methylobacterium nodulans ORS 2060	MNOD_RS22780	Beijerinckiaceae	Methylobacterium-Methylorubrum	Rhizobiales	TTGTGATCGAGCGTTTTGAGGTCAGCTCTTCAAGGTGAGAGTTTGATCCTGGCTCAGAGCGAACGCTGGCGGCAGGCTTAACACATGCAAGTCGAGCGGGCCCTGCGGGGTCAGCGGCAGACGGGTGAGTAACGCGTGGGAACGTGCCCTTCGGTTCGGAACAACCCTGGGAAACTAGGGCTAATACCGGATACGTCCGCAAGGAGAAAGGCTTGACTGCCGAAGGATCGGCCCGCGTCTGATTAGCTGGTTGGTGGGGTAACGGCTCACCAAGGCGACGATCAGTAGCTGGTCTGAGAGGATGATCAGCCACACTGGGACTGAGACACGGCCCAGACTCCTACGGGAGGCAGCAGTGGGGAATATTGGACAATGGGCGCAAGCCTGATCCAGCCATGC…
GCF_000022745.1	Brucella microti CCM 4915	BMI_RS07635	Rhizobiaceae	Brucella	Rhizobiales	TCAACTTGAGAGTTTGATCCTGGCTCAGAACGAACGCTGGCGGCAGGCTTAACACATGCAAGTCGAGCGCCCCGCAAGGGGAGCGGCAGACGGGTGAGTAACGCGTGGGAACGTACCATTTGCTACGGAATAACTCAGGGAAACTTGTGCTAATACCGTATGTGCCCTTCGGGGGAAAGATTTATCGGCAAATGATCGGCCCGCGTTGGATTAGCTAGTTGGTGGGGTAAAGGCTCACCAAGGCGACGATCCATAGCTGGTCTGAGAGGATGATCAGCCACACTGGGACTGAGACACGGCCCAGACTCCTACGGGAGGCAGCAGTGGGGAATATTGGACAATGGGCGCAAGCCTGATCCAGCCATGCCGCGTGAGTGATGAAGGCCCTAGGGTTGTAAA…
GCF_000022745.1	Brucella microti CCM 4915	BMI_RS15390	Rhizobiaceae	Brucella	Rhizobiales	TCAACTTGAGAGTTTGATCCTGGCTCAGAACGAACGCTGGCGGCAGGCTTAACACATGCAAGTCGAGCGCCCCGCAAGGGGAGCGGCAGACGGGTGAGTAACGCGTGGGAACGTACCATTTGCTACGGAATAACTCAGGGAAACTTGTGCTAATACCGTATGTGCCCTTCGGGGGAAAGATTTATCGGCAAATGATCGGCCCGCGTTGGATTAGCTAGTTGGTGGGGTAAAGGCTCACCAAGGCGACGATCCATAGCTGGTCTGAGAGGATGATCAGCCACACTGGGACTGAGACACGGCCCAGACTCCTACGGGAGGCAGCAGTGGGGAATATTGGACAATGGGCGCAAGCCTGATCCAGCCATGCCGCGTGAGTGATGAAGGCCCTAGGGTTGTAAA…
GCF_000022745.1	Brucella microti CCM 4915	BMI_RS08620	Rhizobiaceae	Brucella	Rhizobiales	TCAACTTGAGAGTTTGATCCTGGCTCAGAACGAACGCTGGCGGCAGGCTTAACACATGCAAGTCGAGCGCCCCGCAAGGGGAGCGGCAGACGGGTGAGTAACGCGTGGGAACGTACCATTTGCTACGGAATAACTCAGGGAAACTTGTGCTAATACCGTATGTGCCCTTCGGGGGAAAGATTTATCGGCAAATGATCGGCCCGCGTTGGATTAGCTAGTTGGTGGGGTAAAGGCTCACCAAGGCGACGATCCATAGCTGGTCTGAGAGGATGATCAGCCACACTGGGACTGAGACACGGCCCAGACTCCTACGGGAGGCAGCAGTGGGGAATATTGGACAATGGGCGCAAGCCTGATCCAGCCATGCCGCGTGAGTGATGAAGGCCCTAGGGTTGTAAA…
GCF_000046705.1	Bartonella henselae Houston-1	AYT27_RS06420	Rhizobiaceae	Bartonella	Rhizobiales	TCAATATGAGAGTTTGATCCTGGCTCAGAACGAACGCTGGCGGCAGGCTTAACACATGCAAGTCGAGCGCACTCTTTTAGAGTGAGCGGCAAACGGGTGAGTAACGCGTGGGAATCTACCCATCTCTACGGAATAACACAGAGAAATTTGTGCTAATACCGTATACGTCCTTAGGGAGAAAGATTTATCGGAGATGGATGAGCCCGCGTTGGATTAGCTAGTTGGTGAGGTAACGGCTCACCAAGGCGACGATCCATAGCTGGTCTGAGAGGATGATCAGCCACACTGGGACTGAGACACGGCCCAGACTCCTACGGGAGGCAGCAGTGGGGAATATTGGACAATGGGGGCAACCCTGATCCAGCCATGCCGCGTGAGTGATGAAGGCCCTAGGGTTGT…
GCF_000046705.1	Bartonella henselae Houston-1	AYT27_RS07045	Rhizobiaceae	Bartonella	Rhizobiales	TCAATATGAGAGTTTGATCCTGGCTCAGAACGAACGCTGGCGGCAGGCTTAACACATGCAAGTCGAGCGCACTCTTTTAGAGTGAGCGGCAAACGGGTGAGTAACGCGTGGGAATCTACCCATCTCTACGGAATAACACAGAGAAATTTGTGCTAATACCGTATACGTCCTTAGGGAGAAAGATTTATCGGAGATGGATGAGCCCGCGTTGGATTAGCTAGTTGGTGAGGTAACGGCTCACCAAGGCGACGATCCATAGCTGGTCTGAGAGGATGATCAGCCACACTGGGACTGAGACACGGCCCAGACTCCTACGGGAGGCAGCAGTGGGGAATATTGGACAATGGGGGCAACCCTGATCCAGCCATGCCGCGTGAGTGATGAAGGCCCTAGGGTTGT…
GCF_000083545.1	Methylorubrum extorquens AM1	METD_RS04115	Beijerinckiaceae	Methylobacterium-Methylorubrum	Rhizobiales	CTCCGTTTATGTTGTGATCAGCTGAGATCAACTCTTCAACTTGAGAGTTTGATCCTGGCTCAGAGCGAACGCTGGCGGCAGGCTTAACACATGCAAGTCGAACGGGCACCTTCGGGTGTCAGTGGCAGACGGGTGAGTAACACGTGGGAACGTACCCTTCGGTTCGGAATAACTCAGGGAAACTTGAGCTAATACCGGATACGCCCTTTTGGGGAAAGGTTTACTGCCGAAGGATCGGCCCGCGTCTGATTAGCTTGTTGGTGGGGTAACGGCCTACCAAGGCGACGATCAGTAGCTGGTCTGAGAGGATGATCAGCCACACTGGGACTGAGACACGGCCCAGACTCCTACGGGAGGCAGCAGTGGGGAATATTGGACAATGGGCGCAAGCCTGATCCA…
GCF_000083545.1	Methylorubrum extorquens AM1	METD_RS02530	Beijerinckiaceae	Methylobacterium-Methylorubrum	Rhizobiales	CTCCGTTTATGTTGTGATCAGCTGAGATCAACTCTTCAACTTGAGAGTTTGATCCTGGCTCAGAGCGAACGCTGGCGGCAGGCTTAACACATGCAAGTCGAACGGGCACCTTCGGGTGTCAGTGGCAGACGGGTGAGTAACACGTGGGAACGTACCCTTCGGTTCGGAATAACTCAGGGAAACTTGAGCTAATACCGGATACGCCCTTTTGGGGAAAGGTTTACTGCCGAAGGATCGGCCCGCGTCTGATTAGCTTGTTGGTGGGGTAACGGCCTACCAAGGCGACGATCAGTAGCTGGTCTGAGAGGATGATCAGCCACACTGGGACTGAGACACGGCCCAGACTCCTACGGGAGGCAGCAGTGGGGAATATTGGACAATGGGCGCAAGCCTGATCCA…
GCF_000083545.1	Methylorubrum extorquens AM1	METD_RS08790	Beijerinckiaceae	Methylobacterium-Methylorubrum	Rhizobiales	CTCCGTTTATGTTGTGATCAGCTGAGATCAACTCTTCAACTTGAGAGTTTGATCCTGGCTCAGAGCGAACGCTGGCGGCAGGCTTAACACATGCAAGTCGAACGGGCACCTTCGGGTGTCAGTGGCAGACGGGTGAGTAACACGTGGGAACGTACCCTTCGGTTCGGAATAACTCAGGGAAACTTGAGCTAATACCGGATACGCCCTTTTGGGGAAAGGTTTACTGCCGAAGGATCGGCCCGCGTCTGATTAGCTTGTTGGTGGGGTAACGGCCTACCAAGGCGACGATCAGTAGCTGGTCTGAGAGGATGATCAGCCACACTGGGACTGAGACACGGCCCAGACTCCTACGGGAGGCAGCAGTGGGGAATATTGGACAATGGGCGCAAGCCTGATCCA…
GCF_000083545.1	Methylorubrum extorquens AM1	METD_RS06355	Beijerinckiaceae	Methylobacterium-Methylorubrum	Rhizobiales	CTCCGTTTATGTTGTGATCAGCTGAGATCAACTCTTCAACTTGAGAGTTTGATCCTGGCTCAGAGCGAACGCTGGCGGCAGGCTTAACACATGCAAGTCGAACGGGCACCTTCGGGTGTCAGTGGCAGACGGGTGAGTAACACGTGGGAACGTACCCTTCGGTTCGGAATAACTCAGGGAAACTTGAGCTAATACCGGATACGCCCTTTTGGGGAAAGGTTTACTGCCGAAGGATCGGCCCGCGTCTGATTAGCTTGTTGGTGGGGTAACGGCCTACCAAGGCGACGATCAGTAGCTGGTCTGAGAGGATGATCAGCCACACTGGGACTGAGACACGGCCCAGACTCCTACGGGAGGCAGCAGTGGGGAATATTGGACAATGGGCGCAAGCCTGATCCA…
GCF_000083545.1	Methylorubrum extorquens AM1	METD_RS06465	Beijerinckiaceae	Methylobacterium-Methylorubrum	Rhizobiales	CTCCGTTTATGTTGTGATCAGCTGAGATCAACTCTTCAACTTGAGAGTTTGATCCTGGCTCAGAGCGAACGCTGGCGGCAGGCTTAACACATGCAAGTCGAACGGGCACCTTCGGGTGTCAGTGGCAGACGGGTGAGTAACACGTGGGAACGTACCCTTCGGTTCGGAATAACTCAGGGAAACTTGAGCTAATACCGGATACGCCCTTTTGGGGAAAGGTTTACTGCCGAAGGATCGGCCCGCGTCTGATTAGCTTGTTGGTGGGGTAACGGCCTACCAAGGCGACGATCAGTAGCTGGTCTGAGAGGATGATCAGCCACACTGGGACTGAGACACGGCCCAGACTCCTACGGGAGGCAGCAGTGGGGAATATTGGACAATGGGCGCAAGCCTGATCCA…
GCF_000092025.1	Agrobacterium fabrum C58	ATU_RS00260	Rhizobiaceae	Allorhizobium-Neorhizobium-Pararhizobium-Rhizobium	Rhizobiales	TCAACTTGAGAGTTTGATCCTGGCTCAGAACGAACGCTGGCGGCAGGCTTAACACATGCAAGTCGAACGCCCCGCAAGGGGAGTGGCAGACGGGTGAGTAACGCGTGGGAATCTACCCATCTCTGCGGAATAGCTCTGGGAAACTGGAATTAATACCGCATACGCCCTACGGGGGAAAGATTTATCGGGGATGGATGAGCCCGCGTTGGATTAGCTAGTTGGTGGGGTAAAGGCCTACCAAGGCGACGATCCATAGCTGGTCTGAGAGGATGATCAGCCACATTGGGACTGAGACACGGCCCAAACTCCTACGGGAGGCAGCAGTGGGGAATATTGGACAATGGGCGCAAGCCTGATCCAGCCATGCCGCGTGAGTGATGAAGGCCTTAGGGTTGTAAA…
GCF_000092025.1	Agrobacterium fabrum C58	ATU_RS19535	Rhizobiaceae	Allorhizobium-Neorhizobium-Pararhizobium-Rhizobium	Rhizobiales	TCAACTTGAGAGTTTGATCCTGGCTCAGAACGAACGCTGGCGGCAGGCTTAACACATGCAAGTCGAACGCCCCGCAAGGGGAGTGGCAGACGGGTGAGTAACGCGTGGGAATCTACCCATCTCTGCGGAATAGCTCTGGGAAACTGGAATTAATACCGCATACGCCCTACGGGGGAAAGATTTATCGGGGATGGATGAGCCCGCGTTGGATTAGCTAGTTGGTGGGGTAAAGGCCTACCAAGGCGACGATCCATAGCTGGTCTGAGAGGATGATCAGCCACATTGGGACTGAGACACGGCCCAAACTCCTACGGGAGGCAGCAGTGGGGAATATTGGACAATGGGCGCAAGCCTGATCCAGCCATGCCGCGTGAGTGATGAAGGCCTTAGGGTTGTAAA…
GCF_000092025.1	Agrobacterium fabrum C58	ATU_RS12405	Rhizobiaceae	Allorhizobium-Neorhizobium-Pararhizobium-Rhizobium	Rhizobiales	TCAACTTGAGAGTTTGATCCTGGCTCAGAACGAACGCTGGCGGCAGGCTTAACACATGCAAGTCGAACGCCCCGCAAGGGGAGTGGCAGACGGGTGAGTAACGCGTGGGAATCTACCCATCTCTGCGGAATAGCTCTGGGAAACTGGAATTAATACCGCATACGCCCTACGGGGGAAAGATTTATCGGGGATGGATGAGCCCGCGTTGGATTAGCTAGTTGGTGGGGTAAAGGCCTACCAAGGCGACGATCCATAGCTGGTCTGAGAGGATGATCAGCCACATTGGGACTGAGACACGGCCCAAACTCCTACGGGAGGCAGCAGTGGGGAATATTGGACAATGGGCGCAAGCCTGATCCAGCCATGCCGCGTGAGTGATGAAGGCCTTAGGGTTGTAAA…
GCF_000092025.1	Agrobacterium fabrum C58	ATU_RS18350	Rhizobiaceae	Allorhizobium-Neorhizobium-Pararhizobium-Rhizobium	Rhizobiales	TCAACTTGAGAGTTTGATCCTGGCTCAGAACGAACGCTGGCGGCAGGCTTAACACATGCAAGTCGAACGCCCCGCAAGGGGAGTGGCAGACGGGTGAGTAACGCGTGGGAATCTACCCATCTCTGCGGAATAGCTCTGGGAAACTGGAATTAATACCGCATACGCCCTACGGGGGAAAGATTTATCGGGGATGGATGAGCCCGCGTTGGATTAGCTAGTTGGTGGGGTAAAGGCCTACCAAGGCGACGATCCATAGCTGGTCTGAGAGGATGATCAGCCACATTGGGACTGAGACACGGCCCAAACTCCTACGGGAGGCAGCAGTGGGGAATATTGGACAATGGGCGCAAGCCTGATCCAGCCATGCCGCGTGAGTGATGAAGGCCTTAGGGTTGTAAA…
GCF_000092045.1	Rhizobium etli CFN 42	RHE_RS00305	Rhizobiaceae	Allorhizobium-Neorhizobium-Pararhizobium-Rhizobium	Rhizobiales	CAACATGAGAGTTTGATCCTGGCTCAGAACGAACGCTGGCGGCAGGCTTAACACATGCAAGTCGAGCGCCCCGCAAGGGGAGCGGCAGACGGGTGAGTAACGCGTGGGAACGTACCCTTTACTACGGAATAACGCAGGGAAACTTGTGCTAATACCGTATGTGCCCTTTGGGGGAAAGATTTATCGGTAAAGGATCGGCCCGCGTTGGATTAGCTAGTTGGTGGGGTAAAGGCCTACCAAGGCGACGATCCATAGCTGGTCTGAGAGGATGATCAGCCACATTGGGACTGAGACACGGCCCAAACTCCTACGGGAGGCAGCAGTGGGGAATATTGGACAATGGGCGCAAGCCTGATCCAGCCATGCCGCGTGAGTGATGAAGGCCCTAGGGTTGTAAAG…
GCF_000092045.1	Rhizobium etli CFN 42	RHE_RS17395	Rhizobiaceae	Allorhizobium-Neorhizobium-Pararhizobium-Rhizobium	Rhizobiales	CAACATGAGAGTTTGATCCTGGCTCAGAACGAACGCTGGCGGCAGGCTTAACACATGCAAGTCGAGCGCCCCGCAAGGGGAGCGGCAGACGGGTGAGTAACGCGTGGGAACGTACCCTTTACTACGGAATAACGCAGGGAAACTTGTGCTAATACCGTATGTGCCCTTTGGGGGAAAGATTTATCGGTAAAGGATCGGCCCGCGTTGGATTAGCTAGTTGGTGGGGTAAAGGCCTACCAAGGCGACGATCCATAGCTGGTCTGAGAGGATGATCAGCCACATTGGGACTGAGACACGGCCCAAACTCCTACGGGAGGCAGCAGTGGGGAATATTGGACAATGGGCGCAAGCCTGATCCAGCCATGCCGCGTGAGTGATGAAGGCCCTAGGGTTGTAAAG…
GCF_000092045.1	Rhizobium etli CFN 42	RHE_RS19175	Rhizobiaceae	Allorhizobium-Neorhizobium-Pararhizobium-Rhizobium	Rhizobiales	CAACATGAGAGTTTGATCCTGGCTCAGAACGAACGCTGGCGGCAGGCTTAACACATGCAAGTCGAGCGCCCCGCAAGGGGAGCGGCAGACGGGTGAGTAACGCGTGGGAACGTACCCTTTACTACGGAATAACGCAGGGAAACTTGTGCTAATACCGTATGTGCCCTTTGGGGGAAAGATTTATCGGTAAAGGATCGGCCCGCGTTGGATTAGCTAGTTGGTGGGGTAAAGGCCTACCAAGGCGACGATCCATAGCTGGTCTGAGAGGATGATCAGCCACATTGGGACTGAGACACGGCCCAAACTCCTACGGGAGGCAGCAGTGGGGAATATTGGACAATGGGCGCAAGCCTGATCCAGCCATGCCGCGTGAGTGATGAAGGCCCTAGGGTTGTAAAG…
GCF_000092925.1	Starkeya novella DSM 506	SNOV_RS16270	Xanthobacteraceae	Starkeya	Rhizobiales	TCAACTTGAGAGTTTGATCCTGGCTCAGAACGAACGCTGGCGGCAGGCTTAACACATGCAAGTCGAACGCACCGCAAGGTGAGTGGCAGACGGGTGAGTAACACGTGGGGATCTGCCCAATGGTACGGAATAGCTCCGGGAAACTGGAATTAATACCGTATGTGCCCGCAAGGGGAAAGATTTATCGCCATTGGATGAACCCGCGTCGGATTAGCTAGTTGGTGTGGTAAAGGCGCACCAAGGCGACGATCCGTAGCTGGTCTGAGAGGATGATCAGCCACACTGGGACTGAGACACGGCCCAGACTCCTACGGGAGGCAGCAGTGGGGAATATTGGACAATGGGCGCAAGCCTGATCCAGCCATGCCGCGTGAGTGATGAAGGCCTTAGGGTTGTAAA…
GCF_000143145.1	Hyphomicrobium denitrificans ATCC 51888	HDEN_RS17535	Hyphomicrobiaceae	Hyphomicrobium	Rhizobiales	CAACTTGAGAGTTTGATCCTGGCTCAGAACGAACGCTGGCGGCAGGCCTAACACATGCAAGTCGAACGCCCCGCAAGGGGAGTGGCAGACGGGTGAGTAACACGTGGGAACCTTCCCTATAGTACGGAATAGCCCAGGGAAACTTGGAGTAATACCGTATACGCCCGAAAGGGGAAAGAATTTCGCTATAGGATGGGCCCGCGTAGGATTAGCTAGTTGGTGAGGTAATGGCTCACCAAGGCGACGATCCTTAGCTGGTTTGAGAGAACGACCAGCCACACTGGGACTGAGACACGGCCCAGACTCCTACGGGAGGCAGCAGTGGGGAATATTGGACAATGGGCGCAAGCCTGATCCAGCCATGCCGCGTGAGTGATGAAGGCCTTAGGGTTGTAAAGC…
GCF_000153465.1	Aurantimonas manganoxydans SI85-9A1	SI859A1_RS01855	Rhizobiaceae	Aurantimonas	Rhizobiales	AACCTGAGAGTTTGATCCTGGCTCAGAACGAACGCTGGCGGCAGGCTTAACACATGCAAGTCGAACGCATCCTTCGGGATGAGTGGCAGACGGGTGAGTAACGCGTGGGAATCTACCCATCCCTACGGGATAGCTCCGGGAAACTGGAGATAATACCGTATACGTCCTCCGGGAGAAAGATTTATCGGGGATGGATGAGCCCGCGTTGGATTAGCTAGTTGGTGGGGTAATGGCCTACCAAGGCGACGATCCATAGCTGGTCTAAGAGGATGATCAGCCACATTGGGACTGAGACACGGCCCAAACTCCTACGGGAGGCAGCAGTGGGGAATATTGGACAATGGGCGCAAGCCTGATCCAGCCATGCCGCGTGAGTGATGAAGGCCCTAGGGTTGTAAA…
GCF_000153465.1	Aurantimonas manganoxydans SI85-9A1	SI859A1_RS08260	Rhizobiaceae	Aurantimonas	Rhizobiales	AACCTGAGAGTTTGATCCTGGCTCAGAACGAACGCTGGCGGCAGGCTTAACACATGCAAGTCGAACGCATCCTTCGGGATGAGTGGCAGACGGGTGAGTAACGCGTGGGAATCTACCCATCCCTACGGGATAGCTCCGGGAAACTGGAGATAATACCGTATACGTCCTCCGGGAGAAAGATTTATCGGGGATGGATGAGCCCGCGTTGGATTAGCTAGTTGGTGAGGTAATGGCCTACCAAGGCGACGATCCATAGCTGGTCTAAGAGGATGATCAGCCACATTGGGACTGAGACACGGCCCAAACTCCTACGGGAGGCAGCAGTGGGGAATATTGGACAATGGGCGCAAGCCTGATCCAGCCATGCCGCGTGAGTGATGAAGGCCCTAGGGTTGTAAA…
GCF_000153465.1	Aurantimonas manganoxydans SI85-9A1	SI859A1_RS19740	Rhizobiaceae	Aurantimonas	Rhizobiales	AACCTGAGAGTTTGATCCTGGCTCAGAACGAACGCTGGCGGCAGGCTTAACACATGCAAGTCGAACGCATCCTTCGGGATGAGTGGCAGACGGGTGAGTAACGCGTGGGAATCTACCCATCCCTACGGGATAGCTCCGGGAAACTGGAGATAATACCGTATACGTCCTCCGGGAGAAAGATTTATCGGGGATGGATGAGCCCGCGTTGGATTAGCTAGTTGGTGGGGTAATGGCCTACCAAGGCGACGATCCATAGCTGGTCTAAGAGGATGATCAGCCACATTGGGACTGAGACACGGCCCAAACTCCTACGGGAGGCAGCAGTGGGGAATATTGGACAATGGGCGCAAGCCTGATCCAGCCATGCCGCGTGAGTGATGAAGGCCCTAGGGTTGTAAA…
GCF_000153705.1	Fulvimarina pelagi HTCC2506	FP2506_RS02060	Rhizobiaceae	Fulvimarina	Rhizobiales	GAACCTGAGAGTTTGATCCTGGCTCAGAACGAACGCTGGCGGCAGGCTTAACACATGCAAGTCGAGCGCATCCTTCGGGGTGAGCGGCAGACGGGTGAGTAACGCGTGGGAATCTACCCATCCCTACGGGATAGCTCCGGGAAACTGGAATTAAGACCGTATACGTCCGTAAGGAGAAAGATTTATCGGGGATGGATGAGCCCGCGTAGGATTAGCTAGTTGGTGCGGTAACGGCGTACCAAGGCGACGATCCTTAGCTGGTCTAAGAGGATGATCAGCCACACTGGGACTGAGACACGGCCCAGACTCCTACGGGAGGCAGCAGTGGGGAATATTGGACAATGGGCGCAAGCCTGATCCAGCCATGCCGCGTGAGTGATGACGGTCTTAGGATTGTAA…
GCF_000153705.1	Fulvimarina pelagi HTCC2506	FP2506_RS11080	Rhizobiaceae	Fulvimarina	Rhizobiales	GAACCTGAGAGTTTGATCCTGGCTCAGAACGAACGCTGGCGGCAGGCTTAACACATGCAAGTCGAGCGCATCCTTCGGGGTGAGCGGCAGACGGGTGAGTAACGCGTGGGAATCTACCCATCCCTACGGGATAGCTCCGGGAAACTGGAATTAAGACCGTATACGTCCGTAAGGAGAAAGATTTATCGGGGATGGATGAGCCCGCGTAGGATTAGCTAGTTGGTGCGGTAACGGCGTACCAAGGCGACGATCCTTAGCTGGTCTAAGAGGATGATCAGCCACACTGGGACTGAGACACGGCCCAGACTCCTACGGGAGGCAGCAGTGGGGAATATTGGACAATGGGCGCAAGCCTGATCCAGCCATGCCGCGTGAGTGATGACGGTCTTAGGATTGTAA…
GCF_000153705.1	Fulvimarina pelagi HTCC2506	FP2506_RS14985	Rhizobiaceae	Fulvimarina	Rhizobiales	GAACCTGAGAGTTTGATCCTGGCTCAGAACGAACGCTGGCGGCAGGCTTAACACATGCAAGTCGAGCGCATCCTTCGGGGTGAGCGGCAGACGGGTGAGTAACGCGTGGGAATCTACCCATCCCTACGGGATAGCTCCGGGAAACTGGAATTAAGACCGTATACGTCCGTAAGGAGAAAGATTTATCGGGGATGGATGAGCCCGCGTAGGATTAGCTAGTTGGTGCGGTAACGGCGTACCAAGGCGACGATCCTTAGCTGGTCTAAGAGGATGATCAGCCACACTGGGACTGAGACACGGCCCAGACTCCTACGGGAGGCAGCAGTGGGGAATATTGGACAATGGGCGCAAGCCTGATCCAGCCATGCCGCGTGAGTGATGACGGTCTTAGGATTGTAA…
GCF_000154705.2	Hoeflea phototrophica DFL-43	HPDFL43_RS19205	Rhizobiaceae	Hoeflea	Rhizobiales	TCAACTTGAGAGTTTGATCCTGGCTCAGAACGAACGCTGGCGGCAGGCTTAACACATGCAAGTCGAACGGTCTCTTCGGAGGCAGTGGCAGACGGGTGAGTAACGCGTGGGAATCTACCCATCTCTACGGAACAACAGTTGGAAACGACTGCTAATACCGTATACGCCCTTCGGGGGAAAGATTTATCGGAGATGGATGAGCCCGCGTTGGATTAGCTAGTTGGTGGGGTAAAGGCCTACCAAGGCGACGATCCATAGCTGGTCTGAGAGGATGATCAGCCACACTGGGACTGAGACACGGCCCAGACTCCTACGGGAGGCAGCAGTGGGGAATATTGGACAATGGGCGCAAGCCTGATCCAGCCATGCCGCGTGTGTGATGAAGGCCCTAGGGTTGTA…
GCF_000154705.2	Hoeflea phototrophica DFL-43	HPDFL43_RS02505	Rhizobiaceae	Hoeflea	Rhizobiales	TCAACTTGAGAGTTTGATCCTGGCTCAGAACGAACGCTGGCGGCAGGCTTAACACATGCAAGTCGAACGGTCTCTTCGGAGGCAGTGGCAGACGGGTGAGTAACGCGTGGGAATCTACCCATCTCTACGGAACAACAGTTGGAAACGACTGCTAATACCGTATACGCCCTTCGGGGGAAAGATTTATCGGAGATGGATGAGCCCGCGTTGGATTAGCTAGTTGGTGGGGTAAAGGCCTACCAAGGCGACGATCCATAGCTGGTCTGAGAGGATGATCAGCCACACTGGGACTGAGACACGGCCCAGACTCCTACGGGAGGCAGCAGTGGGGAATATTGGACAATGGGCGCAAGCCTGATCCAGCCATGCCGCGTGTGTGATGAAGGCCCTAGGGTTGTA…
GCF_000158715.1	Brucella neotomae 5K33	BANG_RS0106440	Rhizobiaceae	Brucella	Rhizobiales	TCAACTTGAGAGTTTGATCCTGGCTCAGAACGAACGCTGGCGGCAGGCTTAACACATGCAAGTCGAGCGCCCCGCAAGGGGAGCGGCAGACGGGTGAGTAACGCGTGGGAACGTACCATTTGCTACGGAATAACTCAGGGAAACTTGTGCTAATACCGTATGTGCCCTTCGGGGGAAAGATTTATCGGCAAATGATCGGCCCGCGTTGGATTAGCTAGTTGGTGGGGTAAAGGCTCACCAAGGCGACGATCCATAGCTGGTCTGAGAGGATGATCAGCCACACTGGGACTGAGACACGGCCCAGACTCCTACGGGAGGCAGCAGTGGGGAATATTGGACAATGGGCGCAAGCCTGATCCAGCCATGCCGCGTGAGTGATGAAGGCCCTAGGGTTGTAAA…
GCF_000160295.1	Brucella melitensis bv. 1 16M	BAWG_RS0105945	Rhizobiaceae	Brucella	Rhizobiales	TCAACTTGAGAGTTTGATCCTGGCTCAGAACGAACGCTGGCGGCAGGCTTAACACATGCAAGTCGAGCGCCCCGCAAGGGGAGCGGCAGACGGGTGAGTAACGCGTGGGAACGTACCATTTGCTACGGAATAACTCAGGGAAACTTGTGCTAATACCGTATGTGCCCTTCGGGGGAAAGATTTATCGGCAAATGATCGGCCCGCGTTGGATTAGCTAGTTGGTGGGGTAAAGGCTCACCAAGGCGACGATCCATAGCTGGTCTGAGAGGATGATCAGCCACACTGGGACTGAGACACGGCCCAGACTCCTACGGGAGGCAGCAGTGGGGAATATTGGACAATGGGCGCAAGCCTGATCCAGCCATGCCGCGTGAGTGATGAAGGCCCTAGGGTTGTAAA…
GCF_000166055.1	Rhodomicrobium vannielii ATCC 17100	RVAN_RS10965	Rhodomicrobiaceae	Rhodomicrobium	Rhizobiales	AATCTGAGAGTTTGATCCTGGCTCAGAACGAACGCTGGCGGCAGGCTTAACACATGCAAGTCGAACGCACCGCAAGGTGAGTGGCAGACGGGTGAGTAACGCGTGGGAACCTTCCCTTTGGTACGGAATAACTTCGGGAAACCGAAGCTAATACCGTATATCTCCTCCGGGAGAAAGATTTATCGCCAAAGGATGGGCCCGCGTTGGATTAGCTAGTTGGTGTGGTAAAGGCGCACCAAGGCGACGATCCATAGCTGGTCTGAGAGGATGATCAGCCACACTGGGACTGAGACACGGCCCAGACTCCTACGGGAGGCAGCAGTGGGGAATCTTGGACAATGGGGGCAACCCTGATCCAGCCATGCCGCGTGAGTGAAGAAGGCCTTAGGGTTGTAAAGC…
GCF_000166055.1	Rhodomicrobium vannielii ATCC 17100	RVAN_RS07720	Rhodomicrobiaceae	Rhodomicrobium	Rhizobiales	AATCTGAGAGTTTGATCCTGGCTCAGAACGAACGCTGGCGGCAGGCTTAACACATGCAAGTCGAACGCACCGCAAGGTGAGTGGCAGACGGGTGAGTAACGCGTGGGAACCTTCCCTTTGGTACGGAATAACTTCGGGAAACCGAAGCTAATACCGTATATCTCCTCCGGGAGAAAGATTTATCGCCAAAGGATGGGCCCGCGTTGGATTAGCTAGTTGGTGTGGTAAAGGCGCACCAAGGCGACGATCCATAGCTGGTCTGAGAGGATGATCAGCCACACTGGGACTGAGACACGGCCCAGACTCCTACGGGAGGCAGCAGTGGGGAATCTTGGACAATGGGGGCAACCCTGATCCAGCCATGCCGCGTGAGTGAAGAAGGCCTTAGGGTTGTAAAGC…
GCF_000176035.2	Mesorhizobium opportunistum WSM2075	MESOP_RS08290	Rhizobiaceae	Mesorhizobium	Rhizobiales	AACTTGAGAGTTTGATCCTGGCTCAGAACGAACGCTGGCGGCAGGCTTAACACATGCAAGTCGAGCGCCCCGCAAGGGGAGCGGCAGACGGGTGAGTAACGCGTGGGAATCTACCCATCTCTACGGAACAACTCCGGGAAACTGGAGCTAATACCGTATACGTCCTTACGGAGAAAGATTTATCGGAGATGGATGAGCCCGCGTTGGATTAGCTAGTTGGTGGGGTAATGGCCTACCAAGGCGACGATCCATAGCTGGTCTGAGAGGATGATCAGCCACACTGGGACTGAGACACGGCCCAGACTCCTACGGGAGGCAGCAGTGGGGAATATTGGACAATGGGCGCAAGCCTGATCCAGCCATGCCGCGTGAGTGATGAAGGCCCTAGGGTTGTAAAGC…
GCF_000176035.2	Mesorhizobium opportunistum WSM2075	MESOP_RS08250	Rhizobiaceae	Mesorhizobium	Rhizobiales	AACTTGAGAGTTTGATCCTGGCTCAGAACGAACGCTGGCGGCAGGCTTAACACATGCAAGTCGAGCGCCCCGCAAGGGGAGCGGCAGACGGGTGAGTAACGCGTGGGAATCTACCCATCTCTACGGAACAACTCCGGGAAACTGGAGCTAATACCGTATACGTCCTTACGGAGAAAGATTTATCGGAGATGGATGAGCCCGCGTTGGATTAGCTAGTTGGTGGGGTAATGGCCTACCAAGGCGACGATCCATAGCTGGTCTGAGAGGATGATCAGCCACACTGGGACTGAGACACGGCCCAGACTCCTACGGGAGGCAGCAGTGGGGAATATTGGACAATGGGCGCAAGCCTGATCCAGCCATGCCGCGTGAGTGATGAAGGCCCTAGGGTTGTAAAGC…
GCF_000178815.2	Methylosinus trichosporium OB3b	METTRDRAFT_RS0215435	Beijerinckiaceae	Methylosinus	Rhizobiales	GAACTTGAGAGTTTGATCCTGGCTCAGAACGAACGCTGGCGGCAGGCTTAACACATGCAAGTCGAACGGGCGCAGCGATGCGTCAGTGGCAGACGGGTGAGTAACGCGTGGGAACGTACCTTTCGGTTCGGAATAACTCAGGGAAACTTGAGCTAATACCGGATACGCCCTTAGGGGGAAAGATTTATTGCCGAAAGATCGGCCCGCGTCCGATTAGCTAGTTGGTGAGGTAAAGGCTCACCAAGGCGACGATCGGTAGCTGGTCTGAGAGGATGATCAGCCACACTGGGACTGAGACACGGCCCAGACTCCTACGGGAGGCAGCAGTGGGGAATATTGGACAATGGGCGCAAGCCTGATCCAGCCATGCCGCGTGAGTGATGAAGGCCCTAGGGTTGT…
GCF_000178815.2	Methylosinus trichosporium OB3b	METTRDRAFT_RS0215115	Beijerinckiaceae	Methylosinus	Rhizobiales	GAACTTGAGAGTTTGATCCTGGCTCAGAACGAACGCTGGCGGCAGGCTTAACACATGCAAGTCGAACGGGCGCAGCGATGCGTCAGTGGCAGACGGGTGAGTAACGCGTGGGAACGTACCTTTCGGTTCGGAATAACTCAGGGAAACTTGAGCTAATACCGGATACGCCCTTAGGGGGAAAGATTTATTGCCGAAAGATCGGCCCGCGTCCGATTAGCTAGTTGGTGAGGTAAAGGCTCACCAAGGCGACGATCGGTAGCTGGTCTGAGAGGATGATCAGCCACACTGGGACTGAGACACGGCCCAGACTCCTACGGGAGGCAGCAGTGGGGAATATTGGACAATGGGCGCAAGCCTGATCCAGCCATGCCGCGTGAGTGATGAAGGCCCTAGGGTTGT…
GCF_000182645.1	Ochrobactrum intermedium LMG 3301	OINT_RS09820	Rhizobiaceae	Ochrobactrum	Rhizobiales	TCAACTTGAGAGTTTGATCCTGGCTCAGAACGAACGCTGGCGGCAGGCTTAACACATGCAAGTCGAGCGCCCCGCAAGGGGAGCGGCAGACGGGTGAGTAACGCGTGGGAACGTACCATTTGCTACGGAATAACTCAGGGAAACTTGTGCTAATACCGTATGAGCCCGAAAGGGGAAAGATTTATCGGCAAATGATCGGCCCGCGTTGGATTAGCTAGTTGGTGGGGTAAAGGCCTACCAAGGCGACGATCCATAGCTGGTCTGAGAGGATGATCAGCCACACTGGGACTGAGACACGGCCCAGACTCCTACGGGAGGCAGCAGTGGGGAATATTGGACAATGGGCGCAAGCCTGATCCAGCCATGCCGCGTGAGTGATGAAGGCCCTAGGGTTGTAAA…
GCF_000182645.1	Ochrobactrum intermedium LMG 3301	OINT_RS18235	Rhizobiaceae	Ochrobactrum	Rhizobiales	TCAACTTGAGAGTTTGATCCTGGCTCAGAACGAACGCTGGCGGCAGGCTTAACACATGCAAGTCGAGCGCCCCGCAAGGGGAGCGGCAGACGGGTGAGTAACGCGTGGGAACGTACCATTTGCTACGGAATAACTCAGGGAAACTTGTGCTAATACCGTATGTGCCCGAAAGGGGAAAGATTTATCGGCAAATGATCGGCCCGCGTTGGATTAGCTAGTTGGTGGGGTAAAGGCCTACCAAGGCGACGATCCATAGCTGGTCTGAGAGGATGATCAGCCACACTGGGACTGAGACACGGCCCAGACTCCTACGGGAGGCAGCAGTGGGGAATATTGGACAATGGGCGCAAGCCTGATCCAGCCATGCCGCGTGAGTGATGAAGGCCCTAGGGTTGTAAA…
GCF_000182645.1	Ochrobactrum intermedium LMG 3301	OINT_RS22070	Rhizobiaceae	Ochrobactrum	Rhizobiales	TCAACTTGAGAGTTTGATCCTGGCTCAGAACGAACGCTGGCGGCAGGCTTAACACATGCAAGTCGAGCGCCCCGCAAGGGGAGCGGCAGACGGGTGAGTAACGCGTGGGAACGTACCATTTGCTACGGAATAACTCAGGGAAACTTGTGCTAATACCGTATGTGCCCGAAAGGGGAAAGATTTATCGGCAAATGATCGGCCCGCGTTGGATTAGCTAGTTGGTGGGGTAAAGGCCTACCAAGGCGACGATCCATAGCTGGTCTGAGAGGATGATCAGCCACACTGGGACTGAGACACGGCCCAGACTCCTACGGGAGGCAGCAGTGGGGAATATTGGACAATGGGCGCAAGCCTGATCCAGCCATGCCGCGTGAGTGATGAAGGCCCTAGGGTTGTAAA…
GCF_000182725.1	Brucella inopinata BO1	BIBO1_RS19790	Rhizobiaceae	Brucella	Rhizobiales	TCAACTTGAGAGTTTGATCCTGGCTCAGAACGAACGCTGGCGGCAGGCTTAACACATGCAAGTCGAGCGCCCCGCAAGGGGAGCGGCAGACGGGTGAGTAACGCGTGGGAACGTACCATTTGCTACGGAATAACTCAGGGAAACTTGTGCTAATACCGTATGTGCCCGAAAGGGGAAAGATTTATCGGCAAATGATCGGCCCGCGTTGGATTAGCTAGTTGGTGGGGTAAAGGCCCACCAAGGCGACGATCCATAGCTGGTCTGAGAGGATGATCAGCCACACTGGGACTGAGACACGGCCCAGACTCCTACGGGAGGCAGCAGTGGGGAATATTGGACAATGGGCGCAAGCCTGATCCAGCCATGCCGCGTGAGTGATGAAGGCCCTAGGGTTGTAAA…
GCF_000196435.1	Bartonella tribocorum CIP 105476	BTR_RS08245	Rhizobiaceae	Bartonella	Rhizobiales	TCAATATGAGAGTTTGATCCTGGCTCAGAACGAACGCTGGCGGCAGGCTTAACACATGCAAGTCGAGCGCGCTCCTTTTGGAGCGAGCGGCAAACGGGTGAGTAACGCGTGGGAATCTACCCCTCTCTACGGAATAACACAGAGAAATTTGTGCTAATACCGTATACGTCCCTTTGGGAGAAAGATTTATCGGAGATGGATGAGCCCGCGTTGGATTAGCTAGTTGGTGAGGTAACGGCTCACCAAGGCGACGATCCATAGCTGGTCTGAGAGGATGATCAGCCACACTGGGACTGAGACACGGCCCAGACTCCTACGGGAGGCAGCAGTGGGGAATATTGGACAATGGGGGCAACCCTGATCCAGCCATGCCGCGTGAGTGATGAAGGCCCTAGGGTT…
GCF_000196435.1	Bartonella tribocorum CIP 105476	BTR_RS09100	Rhizobiaceae	Bartonella	Rhizobiales	TCAATATGAGAGTTTGATCCTGGCTCAGAACGAACGCTGGCGGCAGGCTTAACACATGCAAGTCGAGCGCGCTCCTTTTGGAGCGAGCGGCAAACGGGTGAGTAACGCGTGGGAATCTACCCCTCTCTACGGAATAACACAGAGAAATTTGTGCTAATACCGTATACGTCCCTTTGGGAGAAAGATTTATCGGAGATGGATGAGCCCGCGTTGGATTAGCTAGTTGGTGAGGTAACGGCTCACCAAGGCGACGATCCATAGCTGGTCTGAGAGGATGATCAGCCACACTGGGACTGAGACACGGCCCAGACTCCTACGGGAGGCAGCAGTGGGGAATATTGGACAATGGGGGCAACCCTGATCCAGCCATGCCGCGTGAGTGATGAAGGCCCTAGGGTT…
GCF_000218565.1	Oligotropha carboxidovorans OM5	OCA5_RS15900	Xanthobacteraceae	Oligotropha	Rhizobiales	TCCAACTTGAGAGTTTGATCCTGGCTCAGAGCGAACGCTGGCGGCAGGCTTAACACATGCAAGTCGAACGGGCGTAGCAATACGTCAGTGGCAGACGGGTGAGTATCGCGTGGGAACGTACCTTTTGGTTCGGAACAACACAGGGAAACTTGTGCTAATACCGAATAAGCCCTTACGGGGAAAGATTTATCGCCGAAAGATCGGCCCGCGTCTGATTAGCTTGTTGGTGAGGTAACGGCTCACCAAGGCGACGATCAGTAGCTGGTCTGAGAGGATGATCAGCCACATTGGGACTGAGACACGGCCCAAACTCCTACGGGAGGCAGCAGTGGGGAATATTGGACAATGGGCGAAAGCCTGATCCAGCCATGCCGCGTGAGTGATGAAGGCCCTAGGGTT…
GCF_000223195.1	Brucella suis 1330	BS1330_RS15315	Rhizobiaceae	Brucella	Rhizobiales	TCAACTTGAGAGTTTGATCCTGGCTCAGAACGAACGCTGGCGGCAGGCTTAACACATGCAAGTCGAGCGCCCCGCAAGGGGAGCGGCAGACGGGTGAGTAACGCGTGGGAACGTACCATTTGCTACGGAATAACTCAGGGAAACTTGTGCTAATACCGTATGTGCCCTTCGGGGGAAAGATTTATCGGCAAATGATCGGCCCGCGTTGGATTAGCTAGTTGGTGGGGTAAAGGCTCACCAAGGCGACGATCCATAGCTGGTCTGAGAGGATGATCAGCCACACTGGGACTGAGACACGGCCCAGACTCCTACGGGAGGCAGCAGTGGGGAATATTGGACAATGGGCGCAAGCCTGATCCAGCCATGCCGCGTGAGTGATGAAGGCCCTAGGGTTGTAAA…
GCF_000223195.1	Brucella suis 1330	BS1330_RS08575	Rhizobiaceae	Brucella	Rhizobiales	TCAACTTGAGAGTTTGATCCTGGCTCAGAACGAACGCTGGCGGCAGGCTTAACACATGCAAGTCGAGCGCCCCGCAAGGGGAGCGGCAGACGGGTGAGTAACGCGTGGGAACGTACCATTTGCTACGGAATAACTCAGGGAAACTTGTGCTAATACCGTATGTGCCCTTCGGGGGAAAGATTTATCGGCAAATGATCGGCCCGCGTTGGATTAGCTAGTTGGTGGGGTAAAGGCTCACCAAGGCGACGATCCATAGCTGGTCTGAGAGGATGATCAGCCACACTGGGACTGAGACACGGCCCAGACTCCTACGGGAGGCAGCAGTGGGGAATATTGGACAATGGGCGCAAGCCTGATCCAGCCATGCCGCGTGAGTGATGAAGGCCCTAGGGTTGTAAA…
GCF_000223195.1	Brucella suis 1330	BS1330_RS07580	Rhizobiaceae	Brucella	Rhizobiales	TCAACTTGAGAGTTTGATCCTGGCTCAGAACGAACGCTGGCGGCAGGCTTAACACATGCAAGTCGAGCGCCCCGCAAGGGGAGCGGCAGACGGGTGAGTAACGCGTGGGAACGTACCATTTGCTACGGAATAACTCAGGGAAACTTGTGCTAATACCGTATGTGCCCTTCGGGGGAAAGATTTATCGGCAAATGATCGGCCCGCGTTGGATTAGCTAGTTGGTGGGGTAAAGGCTCACCAAGGCGACGATCCATAGCTGGTCTGAGAGGATGATCAGCCACACTGGGACTGAGACACGGCCCAGACTCCTACGGGAGGCAGCAGTGGGGAATATTGGACAATGGGCGCAAGCCTGATCCAGCCATGCCGCGTGAGTGATGAAGGCCCTAGGGTTGTAAA…
GCF_000230555.1	Pelagibacterium halotolerans B2	KKY_RS14020	Devosiaceae	Pelagibacterium	Rhizobiales	AACTTGAGAGTTTGATCCTGGCTCAGAACGAACGCTGGCGGCAGGCTTAACACATGCAAGTCGAACGAAGTCTTCGGACTTAGTGGCAGACGGGTGAGTAACGCGTGGGAATCTACCCAGTTCTCTGGAATAACTGATGGAAACGTCAGCTAATACCGGATACGCCCTTTTGGGGAAAGATTTATCGGGATTGGATGAGCCCGCGTAAGATTAGCTAGTTGGTGGGGTAATGGCCTACCAAGGCGACGATCTTTAGCTGGTCTGAGAGGATGATCAGCCACACTGGGACTGAGACACGGCCCAGACTCCTACGGGAGGCAGCAGTGGGGAATATTGGACAATGGGGGCAACCCTGATCCAGCCATGCCGCGTGAGTGATGAAGGCCTTAGGGTTGTAAA…
GCF_000230555.1	Pelagibacterium halotolerans B2	KKY_RS14050	Devosiaceae	Pelagibacterium	Rhizobiales	AACTTGAGAGTTTGATCCTGGCTCAGAACGAACGCTGGCGGCAGGCTTAACACATGCAAGTCGAACGAAGTCTTCGGACTTAGTGGCAGACGGGTGAGTAACGCGTGGGAATCTACCCAGTTCTCTGGAATAACTGATGGAAACGTCAGCTAATACCGGATACGCCCTTTTGGGGAAAGATTTATCGGGATTGGATGAGCCCGCGTAAGATTAGCTAGTTGGTGGGGTAATGGCCTACCAAGGCGACGATCTTTAGCTGGTCTGAGAGGATGATCAGCCACACTGGGACTGAGACACGGCCCAGACTCCTACGGGAGGCAGCAGTGGGGAATATTGGACAATGGGGGCAACCCTGATCCAGCCATGCCGCGTGAGTGATGAAGGCCTTAGGGTTGTAAA…
GCF_000230995.2	Mesorhizobium australicum WSM2073	MESAU_RS08290	Rhizobiaceae	Mesorhizobium	Rhizobiales	AACTTGAGAGTTTGATCCTGGCTCAGAACGAACGCTGGCGGCAGGCTTAACACATGCAAGTCGAGCGCCCCGCAAGGGGAGCGGCAGACGGGTGAGTAACGCGTGGGAATCTACCCATCTCTACGGAACAACTCCGGGAAACTGGAGCTAATACCGTATACGTCCTTTTGGAGAAAGATTTATCGGAGATGGATGAGCCCGCGTTGGATTAGCTAGTTGGTGGGGTAATGGCCTACCAAGGCGACGATCCATAGCTGGTCTGAGAGGATGATCAGCCACACTGGGACTGAGACACGGCCCAGACTCCTACGGGAGGCAGCAGTGGGGAATATTGGACAATGGGCGCAAGCCTGATCCAGCCATGCCGCGTGAGTGATGAAGGCCCTAGGGTTGTAAAGC…
GCF_000230995.2	Mesorhizobium australicum WSM2073	MESAU_RS08325	Rhizobiaceae	Mesorhizobium	Rhizobiales	AACTTGAGAGTTTGATCCTGGCTCAGAACGAACGCTGGCGGCAGGCTTAACACATGCAAGTCGAGCGCCCCGCAAGGGGAGCGGCAGACGGGTGAGTAACGCGTGGGAATCTACCCATCTCTACGGAACAACTCCGGGAAACTGGAGCTAATACCGTATACGTCCTTTTGGAGAAAGATTTATCGGAGATGGATGAGCCCGCGTTGGATTAGCTAGTTGGTGGGGTAATGGCCTACCAAGGCGACGATCCATAGCTGGTCTGAGAGGATGATCAGCCACACTGGGACTGAGACACGGCCCAGACTCCTACGGGAGGCAGCAGTGGGGAATATTGGACAATGGGCGCAAGCCTGATCCAGCCATGCCGCGTGAGTGATGAAGGCCCTAGGGTTGTAAAGC…
GCF_000236565.1	Mesorhizobium alhagi CCNWXJ12-2	MAXJ12_RS07380	Rhizobiaceae	NA	Rhizobiales	AACTTGAGAGTTTGATCCTGGCTCAGAACGAACGCTGGCGGCAGGCTTAACACATGCAAGTCGAGCGCCCCGCAAGGGGAGCGGCAGACGGGTGAGTAACGCGTGGGAATCTACCCATCACTACGGAACAACTCCGGGAAACTGGAGCTAATACCGTATACGTCCTTCGGGAGAAAGATTTATCGGTGATGGATGAGCCCGCGTTGGATTAGCTAGTTGGTGGGGTAATGGCCTACCAAGGCGACGATCCATAGCTGGTCTGAGAGGATGATCAGCCACACTGGGACTGAGACACGGCCCAGACTCCTACGGGAGGCAGCAGTGGGGAATATTGGACAATGGGCGAAAGCCTGATCCAGCCATGCCGCGTGAGTGATGAAGGCCCTAGGGTTGTAAAGC…
GCF_000250795.1	Brucella melitensis bv. 1 16M	OOO_RS0101735	Rhizobiaceae	Brucella	Rhizobiales	TCAACTTGAGAGTTTGATCCTGGCTCAGAACGAACGCTGGCGGCAGGCTTAACACATGCAAGTCGAGCGCCCCGCAAGGGGAGCGGCAGACGGGTGAGTAACGCGTGGGAACGTACCATTTGCTACGGAATAACTCAGGGAAACTTGTGCTAATACCGTATGTGCCCTTCGGGGGAAAGATTTATCGGCAAATGATCGGCCCGCGTTGGATTAGCTAGTTGGTGGGGTAAAGGCTCACCAAGGCGACGATCCATAGCTGGTCTGAGAGGATGATCAGCCACACTGGGACTGAGACACGGCCCAGACTCCTACGGGAGGCAGCAGTGGGGAATATTGGACAATGGGCGCAAGCCTGATCCAGCCATGCCGCGTGAGTGATGAAGGCCCTAGGGTTGTAAA…
GCF_000261485.1	Ensifer sojae CCBAU 05684	IC28_RS27435	Rhizobiaceae	Ensifer	Rhizobiales	TCAACTTGAGAGTTTGATCCTGGCTCAGAACGAACGCTGGCGGCAGGCTTAACACATGCAAGTCGAGCGCGTAGCAATACGAGCGGCAGACGGGTGAGTAACGCGTGGGAATCTACCCTTTTCTACGGAATAACGCAGGGAAACTTGTGCTAATACCGTATGAGCCCTTCGGGGGAAAGATTTATCGGGAAAGGATGAGCCCGCGTTGGATTAGCTAGTTGGTGGGGTAAAGGCCTACCAAGGCGACGATCCATAGCTGGTCTGAGAGGATGATCAGCCACATTGGGACTGAGACACGGCCCAAACTCCTACGGGAGGCAGCAGTGGGGAATATTGGACAATGGGCGCAAGCCTGATCCAGCCATGCCGCGTGAGTGATGAAGGCCCTAGGGTTGTAAA…
GCF_000262405.1	Microvirga lotononidis WSM3557	MICLODRAFT_RS12745	Beijerinckiaceae	Microvirga	Rhizobiales	TCTTCAACTTGAGAGTTTGATCCTGGCTCAGAACGAACGCTGGCGGCAGGCTTAACACATGCAAGTCGAACGGGCCCTTCGGGGTCAGTGGCAGACGGGTGAGTAACGCGTGGGAACGTGCCCTTCAGTTTGGAATAACCCAGGGAAACTTGGGCTAATACCGGATACGCCCGCAAGGGGAAAGATTTATCGCTGAAGGATCGGCCCGCGTCTGATTAGCTGGTTGGTGAGGTAATGGCTCACCAAGGCGACGATCAGTAGCTGGTCTGAGAGGATGATCAGCCACATTGGGACTGAGACACGGCCCAAACTCCTACGGGAGGCAGCAGTGGGGAATATTGGACAATGGGCGCAAGCCTGATCCAGCCATGCCGCGTGAGTGATGACGGCCTTAGGGTT…
GCF_000273375.1	Bartonella birtlesii IBS 325	QWU_RS00040	Rhizobiaceae	Bartonella	Rhizobiales	TCAATATGAGAGTTTGATCCTGGCTCAGAACGAACGCTGGCGGCAGGCTTAACACATGCAAGTCGAGCGCACTCTTTTAGAGTGAGCGGCAAACGGGTGAGTAACGCGTGGGAATCTACCCATCTCTACGGAATAACACAGAGAAATTTGTGCTAATACCGTATACGTCCCTTCGGGGAGAAAGATTTATCGGAGATGGATGAGCCCGCGTTGGATTAGCTAGTTGGTGAGGTAACGGCTCACCAAGGCGACGATCCATAGCTGGTCTGAGAGGATGATCAGCCACACTGGGACTGAGACACGGCCCAGACTCCTACGGGAGGCAGCAGTGGGGAATATTGGACAATGGGGGCAACCCTGATCCAGCCATGCCGCGTGAGTGATGAAGGCCCTAGGGTT…
GCF_000273375.1	Bartonella birtlesii IBS 325	QWU_RS00905	Rhizobiaceae	Bartonella	Rhizobiales	TCAATATGAGAGTTTGATCCTGGCTCAGAACGAACGCTGGCGGCAGGCTTAACACATGCAAGTCGAGCGCACTCTTTTAGAGTGAGCGGCAAACGGGTGAGTAACGCGTGGGAATCTACCCATCTCTACGGAATAACACAGAGAAATTTGTGCTAATACCGTATACGTCCCTTCGGGGAGAAAGATTTATCGGAGATGGATGAGCCCGCGTTGGATTAGCTAGTTGGTGAGGTAACGGCTCACCAAGGCGACGATCCATAGCTGGTCTGAGAGGATGATCAGCCACACTGGGACTGAGACACGGCCCAGACTCCTACGGGAGGCAGCAGTGGGGAATATTGGACAATGGGGGCAACCCTGATCCAGCCATGCCGCGTGAGTGATGAAGGCCCTAGGGTT…
GCF_000278155.1	Bartonella doshiae NCTC 12862 = ATCC 700133	MCS_RS04530	Rhizobiaceae	Bartonella	Rhizobiales	TCAATATGAGAGTTTGATCCTGGCTCAGAACGAACGCTGGCGGCAGGCTTAACACATGCAAGTCGAGCGCACTCTTTTAGAGTGAGCGGCAAACGGGTGAGTAACGCGTGGGAATCTACCCATCTCTACGGAATAACACAGAGAAATTTGTGCTAATACCGTATACGTCCTTAGGGAGAAAGATTTATCGGAGATGGATGAGCCCGCGTTGGATTAGCTAGTTGGTGAGGTAACGGCTCACCAAGGCGACGATCCATAGCTGGTCTGAGAGGATGATCAGCCACACTGGGACTGAGACACGGCCCAGACTCCTACGGGAGGCAGCAGTGGGGAATATTGGACAATGGGGGCAACCCTGATCCAGCCATGCCGCGTGAGTGATGAAGGCCCTAGGGTTGT…
GCF_000278155.1	Bartonella doshiae NCTC 12862 = ATCC 700133	MCS_RS06605	Rhizobiaceae	Bartonella	Rhizobiales	TCAATATGAGAGTTTGATCCTGGCTCAGAACGAACGCTGGCGGCAGGCTTAACACATGCAAGTCGAGCGCACTCTTTTAGAGTGAGCGGCAAACGGGTGAGTAACGCGTGGGAATCTACCCATCTCTACGGAATAACACAGAGAAATTTGTGCTAATACCGTATACGTCCTTAGGGAGAAAGATTTATCGGAGATGGATGAGCCCGCGTTGGATTAGCTAGTTGGTGAGGTAACGGCTCACCAAGGCGACGATCCATAGCTGGTCTGAGAGGATGATCAGCCACACTGGGACTGAGACACGGCCCAGACTCCTACGGGAGGCAGCAGTGGGGAATATTGGACAATGGGGGCAACCCTGATCCAGCCATGCCGCGTGAGTGATGAAGGCCCTAGGGTTGT…
GCF_000278215.1	Bartonella rattimassiliensis 15908	MCY_RS06520	Rhizobiaceae	Bartonella	Rhizobiales	TCAATATGAGAGTTTGATCCTGGCTCAGAACGAACGCTGGCGGCAGGCTTAACACATGCAAGTCGAGCGCACTCTTTTTAGAGTGAGCGGCAAACGGGTGAGTAACGCGTGGGAATCTACCCATTTCTACGGAATAACACAGAGAAATTTGTGCTAATACCGTATACGTCCTATTGGAGAAAGATTTATCGGAGATGGATGAGCCCGCGTTGGATTAGCTAGTTGGTGAGGTAACGGCTCACCAAGGCGACGATCCATAGCTGGTCTGAGAGGATGATCAGCCACACTGGGACTGAGACACGGCCCAGACTCCTACGGGAGGCAGCAGTGGGGAATATTGGACAATGGGGGCAACCCTGATCCAGCCATGCCGCGTGAGTGATGAAGGCCCTAGGGTTG…
GCF_000278235.1	Bartonella vinsonii subsp. arupensis OK-94-513	ME1_RS03130	Rhizobiaceae	Bartonella	Rhizobiales	TCAATATGAGAGTTTGATCCTGGCTCAGAACGAACGCTGGCGGCAGGCTTAACACATGCAAGTCGAGCGCACTCTTTTAGAGTGAGCGGCAAACGGGTGAGTAACGCGTGGGAATCTACCCATCTCTACGGAATAACACAGAGAAATTTGTGCTAATACCGTATACGTCCTTAGGGAGAAAGATTTATCGGAGATGGATGAGCCCGCGTTGGATTAGCTAGTTGGTGAGGTAAAGGCTCACCAAGGCGACGATCCATAGCTGGTCTGAGAGGATGATCAGCCACACTGGGACTGAGACACGGCCCAGACTCCTACGGGAGGCAGCAGTGGGGAATATTGGACAATGGGGGCAACCCTGATCCAGCCATGCCGCGTGAGTGATGAAGGCCCTAGGGTTGT…
GCF_000278315.1	Bartonella elizabethae F9251 = ATCC 49927	MEE_RS08540	Rhizobiaceae	Bartonella	Rhizobiales	TCAATATGAGAGTTTGATCCTGGCTCAGAACGAACGCTGGCGGCAGGCTTAACACATGCAAGTCGAGCGCGCTCCTTTTGGAGCGAGCGGCAAACGGGTGAGTAACGCGTGGGAATCTACCCCTCTCTACGGAATAACACAGAGAAATTTGTGCTAATACCGTATACGTCCCTTTGGGAGAAAGATTTATCGGAGATGGATGAGCCCGCGTTGGATTAGCTAGTTGGTGAGGTAACGGCTCACCAAGGCGACGATCCATAGCTGGTCTGAGAGGATGATCAGCCACACTGGGACTGAGACACGGCCCAGACTCCTACGGGAGGCAGCAGTGGGGAATATTGGACAATGGGGGCAACCCTGATCCAGCCATGCCGCGTGAGTGATGAAGGCCCTAGGGTT…
GCF_000278315.1	Bartonella elizabethae F9251 = ATCC 49927	MEE_RS05760	Rhizobiaceae	Bartonella	Rhizobiales	TCAATATGAGAGTTTGATCCTGGCTCAGAACGAACGCTGGCGGCAGGCTTAACACATGCAAGTCGAGCGCGCTCCTTTTGGAGCGAGCGGCAAACGGGTGAGTAACGCGTGGGAATCTACCCCTCTCTACGGAATAACACAGAGAAATTTGTGCTAATACCGTATACGTCCCTTTGGGAGAAAGATTTATCGGAGATGGATGAGCCCGCGTTGGATTAGCTAGTTGGTGAGGTAACGGCTCACCAAGGCGACGATCCATAGCTGGTCTGAGAGGATGATCAGCCACACTGGGACTGAGACACGGCCCAGACTCCTACGGGAGGCAGCAGTGGGGAATATTGGACAATGGGGGCAACCCTGATCCAGCCATGCCGCGTGAGTGATGAAGGCCCTAGGGTT…
GCF_000280015.1	Bartonella alsatica IBS 382	MEC_RS00010	Rhizobiaceae	Bartonella	Rhizobiales	CAAATATGAGAGTTTGATCCTGGCTCAGAACGAACGCTGGCGGCAGGCTTAACACATGCAAGTCGAGCGCACTCTTTTAGGGTGAGCGGCAAACGGGTGAGTAACGCGTGGGAATCTACCCCTCTCTACGGAATAACACGGAGAAATTTGTGCTAATACCGTATACGTCCCTACGGGGAGAAAGATTTATCGGAGATGGATGAGCCCGCGTTGGATTAGCTAGTTGGTGAGGTAATGGCTCCCCAAGGCGACGATCCATAGCTGGTCTGAGAGGATGATCAGCCACACTGGGACTGAGACACGGCCCAGACTCCTACGGGAGGCAGCAGTGGGGAATATTGGACAATGGGGGCAACCCTGATCCAGCCATGCCGCGTGAGTGATGAAGGCCCTAGGGTT…
GCF_000280015.1	Bartonella alsatica IBS 382	MEC_RS00715	Rhizobiaceae	Bartonella	Rhizobiales	CAAATATGAGAGTTTGATCCTGGCTCAGAACGAACGCTGGCGGCAGGCTTAACACATGCAAGTCGAGCGCACTCTTTTAGGGTGAGCGGCAAACGGGTGAGTAACGCGTGGGAATCTACCCCTCTCTACGGAATAACACGGAGAAATTTGTGCTAATACCGTATACGTCCCTACGGGGAGAAAGATTTATCGGAGATGGATGAGCCCGCGTTGGATTAGCTAGTTGGTGAGGTAATGGCTCCCCAAGGCGACGATCCATAGCTGGTCTGAGAGGATGATCAGCCACACTGGGACTGAGACACGGCCCAGACTCCTACGGGAGGCAGCAGTGGGGAATATTGGACAATGGGGGCAACCCTGATCCAGCCATGCCGCGTGAGTGATGAAGGCCCTAGGGTT…
GCF_000280015.1	Bartonella alsatica IBS 382	MEC_RS06915	Rhizobiaceae	Bartonella	Rhizobiales	CAAATATGAGAGTTTGATCCTGGCTCAGAACGAACGCTGGCGGCAGGCTTAACACATGCAAGTCGAGCGCACTCTTTTAGGGTGAGCGGCAAACGGGTGAGTAACGCGTGGGAATCTACCCCTCTCTACGGAATAACACGGAGAAATTTGTGCTAATACCGTATACGTCCCTACGGGGAGAAAGATTTATCGGAGATGGATGAGCCCGCGTTGGATTAGCTAGTTGGTGAGGTAATGGCTCCCCAAGGCGACGATCCATAGCTGGTCTGAGAGGATGATCAGCCACACTGGGACTGAGACACGGCCCAGACTCCTACGGGAGGCAGCAGTGGGGAATATTGGACAATGGGGGCAACCCTGATCCAGCCATGCCGCGTGAGTGATGAAGGCCCTAGGGTT…
GCF_000283235.1	Methylocystis parvus OBBP	O5O_RS0123145	Beijerinckiaceae	Methylocystis	Rhizobiales	TCCAACTTGAGAGTTTGATCCTGGCTCAGAACGAACGCTGGCGGCAGGCCTAACACATGCAAGTCGAACGCTGTAGCAATACAGAGTGGCAGACGGGTGAGTAACGCGTGGGAACGTGCCTTTCGGTTCGGAATAACTCAGGGAAACTTGAGCTAATACCGGATACGCCCTTTGGGGGAAAGATTTATTGCCGAAAGATCGGCCCGCGTCCGATTAGCTAGTTGGTGTGGTAATGGCGCACCAAGGCGACGATCGGTAGCTGGTCTGAGAGGATGATCAGCCACACTGGGACTGAGACACGGCCCAGACTCCTACGGGAGGCAGCAGTGGGGAATATTGGACAATGGGCGCAAGCCTGATCCAGCCATGCCGCGTGAGTGATGAAGGCCCTAGGGTTGT…
GCF_000283235.1	Methylocystis parvus OBBP	O5O_RS0123425	NA	NA	NA	CTGGGGAACTTGAGTGCAGAAGAGAAAAGCGGAATTCCACGTGTAGCGGTGAAATGCGTAGAGATGTGGAGGAACACCAGTGGCGAAGGCGGCTTTTTGGTCTGTAACTGACGCTGAGGCGCGAAAGCGTGGGGAGCAAACAGGATTAGATACCCTGGTAGTCCACGCCGTAAACGATGAGTGCTAAGTGTTAGAGGGTTTCCGCCCTTTAGTGCTGCAGCTAACGCATTAAGCACTCCGCCTGGGGAGTACGGTCGCAAGGACTGAAACTCAAAGGAATTGACGGGGGCCCGCACAAGCGGTGGAGCATGTGGTTTAATTCGATGCAACGCGAAGAACCTTACCTGGTCTTGACATGCCGGGAATTTTCCAGAAATGGAGAAGTGCCTTCGGGAACCC…
GCF_000284375.1	Bradyrhizobium japonicum USDA 6	BJ6T_RS07365	Xanthobacteraceae	Bradyrhizobium	Rhizobiales	TCCAACTTGAGAGTTTGATCCTGGCTCAGAGCGAACGCTGGCGGCAGGCTTAACACATGCAAGTCGAGCGGGCGTAGCAATACGTCAGCGGCAGACGGGTGAGTAACGCGTGGGAACGTACCTTTTGGTTCGGAACAACACAGGGAAACTTGTGCTAATACCGGATAAGCCCTTACGGGGAAAGATTTATCGCCGAAAGATCGGCCCGCGTCTGATTAGCTAGTTGGTGAGGTAATGGCTCACCAAGGCGACGATCAGTAGCTGGTCTGAGAGGATGATCAGCCACATTGGGACTGAGACACGGCCCAAACTCCTACGGGAGGCAGCAGTGGGGAATATTGGACAATGGGGGCAACCCTGATCCAGCCATGCCGCGTGAGTGATGAAGGCCCTAGGGTT…
GCF_000284375.1	Bradyrhizobium japonicum USDA 6	BJ6T_RS29715	Xanthobacteraceae	Bradyrhizobium	Rhizobiales	TCCAACTTGAGAGTTTGATCCTGGCTCAGAGCGAACGCTGGCGGCAGGCTTAACACATGCAAGTCGAGCGGGCGTAGCAATACGTCAGCGGCAGACGGGTGAGTAACGCGTGGGAACGTACCTTTTGGTTCGGAACAACACAGGGAAACTTGTGCTAATACCGGATAAGCCCTTACGGGGAAAGATTTATCGCCGAAAGATCGGCCCGCGTCTGATTAGCTAGTTGGTGAGGTAATGGCTCACCAAGGCGACGATCAGTAGCTGGTCTGAGAGGATGATCAGCCACATTGGGACTGAGACACGGCCCAAACTCCTACGGGAGGCAGCAGTGGGGAATATTGGACAATGGGGGCAACCCTGATCCAGCCATGCCGCGTGAGTGATGAAGGCCCTAGGGTT…
GCF_000298315.2	Rhizobium grahamii CCGE 502	RGCCGE502_RS26405	Rhizobiaceae	Allorhizobium-Neorhizobium-Pararhizobium-Rhizobium	Rhizobiales	CAACATGAGAGTTTGATCCTGGCTCAGAACGAACGCTGGCGGCAGGCTTAACACATGCAAGTCGAGCGCCCCGCAAGGGGAGCGGCAGACGGGTGAGTAACGCGTGGGAACGTACCCTTTACTACGGAATAACGCATGGAAACGTGTGCTAATACCGTATGTGCCCTTCGGGGGAAAGATTTATCGGTAAAGGATCGGCCCGCGTTGGATTAGCTAGTTGGTGGGGTAAAGGCCTACCAAGGCGACGATCCATAGCTGGTCTGAGAGGATGATCAGCCACATTGGGACTGAGACACGGCCCAAACTCCTACGGGGAGCAGCAGGTGGGGAATATTGGAACAAGTGGGCGACAACGCCTGACTCCACGCCATGCCGCGTGAGTGATGAACGGCCGTTAGG…
GCF_000298315.2	Rhizobium grahamii CCGE 502	RGCCGE502_RS34265	Rhizobiaceae	Allorhizobium-Neorhizobium-Pararhizobium-Rhizobium	Rhizobiales	CAACATGAGAGTTTGATCCTGGCTCAGAACGAACGCTGGCGGCAGGCTTAACACATGCAAGTCGAGCGCCCCGCAAGGGGAGCGGCAGACGGGTGAGTAACGCGTGGGAACGTACCCTTTACTACGGAATAACGCATGGAAACGTGTGCTAATACCGTATGTGCCCTTCGGGGGAAAGATTTATCGGTAAAGGATCGGCCCGCGTTGGATTAGCTAGTTGGTGGGGTAAAGGCCTACCAAGGCGACGATCCATAGCTGGTCTGAGAGGATGATCAGCCACATTGGGACTGAGACACGGCCCAAACTCCTACGGGAGGCAGCAGTGGGGAATATTGGACAATGGGCGCAAGCCTGATCCAGCCATGCCGCGTGAGTGATGAAGGCCTTAGGGTTGTAAAG…
GCF_000300335.1	Nitratireductor pacificus pht-3B	NA2_RS17920	Rhizobiaceae	Nitratireductor	Rhizobiales	AACATGAGAGTTTGATCCTGGCTCAGAACGAACGCTGGCGGCAGGCTTAACACATGCAAGTCGAGCGCCCCGCAAGGGGAGCGGCAGACGGGTGAGTAACACGTGGGAATCTACCCAGCTCTACGGAATAACTCAGGGAAACTTGAACTAATACCGTATACGTCCTCCGGGAGAAAGATTTATCGGAGTTGGATGAGCCCGCGTCTGATTAGCTAGTTGGTGGGGTAAAGGCCTACCAAGGCGACGATCAGTAGCTGGTCTGAGAGGATGATCAGCCACACTGGGACTGAGACACGGCCCAGACTCCTACGGGAGGCAGCAGTGGGGAATATTGGACAATGGGCGCAAGCCTGATCCAGCCATGCCGCGTGAGTGATGAAGGCCCTAGGGTTGTAAAGC…
GCF_000300515.1	Nitratireductor indicus C115	NA8A_RS23990	Rhizobiaceae	Nitratireductor	Rhizobiales	AACATGAGAGTTTGATCCTGGCTCAGAACGAACGCTGGCGGCAGGCTTAACACATGCAAGTCGAGCGCCCCGCAAGGGGAGCGGCAGACGGGTGAGTAACGCGTGGGAATCTACCTAGCTCTACGGAATAACTCAGGGAAACTTGAACTAATACCGTATACGCCCTTTGGGGGAAAGATTTATCGGAGTTGGATGAGCCCGCGTCTGATTAGCTAGTTGGTGGGGTAAAGGCCTACCAAGGCGACGATCAGTAGCTGGTCTGAGAGGATGATCAGCCACACTGGGACTGAGACACGGCCCAGACTCCTACGGGAGGCAGCAGTGGGGAATATTGGACAATGGGCGCAAGCCTGATCCAGCCATGCCGCGTGAGTGATGAAGGCCCTAGGGTTGTAAAGC…
GCF_000308295.2	Afipia birgiae 34632	BN32_RS23560	Xanthobacteraceae	Afipia	Rhizobiales	TCCAACTTGAGAGTTTGATCCTGGCTCAGAGCGAACGCTGGCGGCAGGCTTAACACATGCAAGTCGAGCGGGCGTAGCAATACGTCAGCGGCAGACGGGTGAGTAACGCGTGGGAACGTACCTTTTGGTTCGGAACAACACAGGGAAACTTGTGCTAATACCGGATAAGCCCTTACGGGGAAAGATTTATCGCCGAAAGATCGGCCCGCGTCTGATTAGCTAGTTGGTGAGGTAACGGCTCACCAAGGCGACGATCAGTAGCTGGTCTGAGAGGATGATCAGCCACATTGGGACTGAGACACGGCCCAAACTCCTACGGGAGGCAGCAGTGGGGAATATTGGACAATGGGCGCAAGCCTGATCCAGCCATGCCGCGTGAGTGATGAAGGCCCTAGGGTT…
GCF_000312525.1	Bartonella florencae R4	BN202_RS08385	Rhizobiaceae	Bartonella	Rhizobiales	TCAATATGAGAGTTTGATCCTGGCTCAGAACGAACGCTGGCGGCAGGCTTAACACATGCAAGTCGAGCGCGCTCCTCTGGAGCGAGCGGCAAACGGGTGAGTAACGCGTGGGAATCTACCCATCTCTACGGAATAACACAGAGAAATTTGTGCTAATACCGTATGCGTCCTTTTTGGAGAAAGATTTATCGGAGATGGATGAGCCCGCGTTGGATTAGCTAGTTGGTGAGGTAACGGCTCACCAAGGCGACGATCCATAGCTGGTCTGAGAGGATGATCAGCCACACTGGGACTGAGACACGGCCCAGACTCCTACGGGAGGCAGCAGTGGGGAATATTGGACAATGGGGGCAACCCTGATCCAGCCATGCCGCGTGAGTGATGAAGGCCCTAGGGTTG…
GCF_000312545.1	Bartonella senegalensis OS02	BN200_RS08240	Rhizobiaceae	Bartonella	Rhizobiales	TCAATATGAGAGTTTGATCCTGGCTCAGAACGAACGCTGGCGGCAGGCTTAACACATGCAAGTCGAGCGCACTCTTTTAGAGTGAGCGGCAAACGGGTGAGTAACGCGTGGGAATCTACCCATCTCTACGGAATAACACAGAGAAATTTGTGCTAATACCGTATACGTCCCTTGGGAGAAAGATTTATCGGAGATGGATGAGCCCGCGTTGGATTAGCTAGTTGGTGAGGTAACGGCTCACCAAGGCGACGATCCATAGCTGGTCTGAGAGGATGATCAGCCACACTGGGACTGAGACACGGCCCAGACTCCTACGGGAGGCAGCAGTGGGGAATATTGGACAATGGGGGCAACCCTGATCCAGCCATGCCGCGTGAGTGATGAAGGCCCTAGGGTTGT…
GCF_000312565.1	Bartonella rattaustraliani AUST/NH4	BN67_RS09880	Rhizobiaceae	Bartonella	Rhizobiales	GCAGGCTTAACACATGCAAGTCGAGCGCACTCTTTTAGAGTGAGCGGCAAACGGGTGAGTAACGCGTGGGAATCTACCCATCTCTACGGAATAACACAGAGAAATTTGTGCTAATACCGTATACGTCCTTAGGGAGAAAGATTTATCGGAGATGGATGAGCCCGCGTTGGATTAGCTAGTTGGTGAGGTAACGGCTCACCAAGGCGACGATCCATAGCTGGTCTGAGAGGATGATCAGCCACACTGGGACTGAGACACGGCCCAGACTCCTACGGGAGGCAGCAGTGGGGAATATTGGACAATGGGGGCAACCCTGATCCAGCCATGCCGCGTGAGTGATGAAGGCCTTAGGGTTGTAAAGCTCTTTCACCGGTGAAGATAATGACGGTAACCGGAGAA…
GCF_000312565.1	Bartonella rattaustraliani AUST/NH4	BN67_RS13835	Rhizobiaceae	Bartonella	Rhizobiales	GTTTGATCCTGGCTCAGAACGAACGCTGGCGGCAGGCTTAACACATGCAAGTCGAGCGCACTCTTTTAGAGTGAGCGGCAAACGGGTGAGTAACGCGTGGGAATCTACCCATCTCTACGGAATAACACAGAGAAATTTGTGCTAATACCGTATACGTCCTTAGGGAGAAAGATTTATCGGA
GCF_000312565.1	Bartonella rattaustraliani AUST/NH4	BN67_RS09885	Rhizobiaceae	Bartonella	Rhizobiales	TCAATATGAGAGTTTGATCCTGGCTCAGAACGAACGCTGGCGGCAGGCTTAACACATGCAAGTCGAGCGCACTCTTTTAGAGTGAGCGGCAAACGGGTGAGTAACGCGTGGGAATCTACCCATCTCTACGGAATAACACAGAGAAATTTGTGCTAATACCGTATACGTCCTTAGGGAGAAAGATTTATCGGAGATGGATGAGCCCGCGTTGGATTAGCTAGTTGGTGAGGTAACGGCTCACCAAGGCGACGATCCATAGCTGGTCTGAGAGGATGATCAGCCACACTGGGACTGAGACACGGCCCAGACTCCTACGGGAGGCAGCAGTGGGGAATATTGGACAATGGGGGCAACCCTGATCCAGCCATGCCGCGTGAGTGATGAAGGCCTTAGGGTTGT…
GCF_000312605.1	Bartonella rattimassiliensis 15908	BN339_RS10090	Rhizobiaceae	Bartonella	Rhizobiales	AACGCTGGCGGCAGGCTTAACACATGCAAGTCGAGCGCACTCTTTTTAGAGTGAGCGGCAAACGGGTGAGTAACGCGTGGGAATCTACCCATTTCTACGGAATAACACAGAGAAATTTGTGCTAATACCGTATACGTCCTATTGGAGAAAGATTTATCGGAGATGGATGAGCCCGCGTTGGATTAGCTAGTTGGTGAGGTAACGGCTCACCAAGGCGACGATCCATAGCTGGTCTGAGAGGATGATCAGCCACACTGGGACTGAGACACGGCCCAGACTCCTACGGGAGGCAGCAGTGGGGAATATTGGACAATGGGGGCAACCCTGATCCAGCCATGCCGCGTGAGTGATGAAGGCCCTAGGGTTGTAAAGCTCTTTCACCGGTGAAGATAATGACGG…
GCF_000312605.1	Bartonella rattimassiliensis 15908	BN339_RS07265	Rhizobiaceae	Bartonella	Rhizobiales	TCAATATGAGAGTTTGATCCTGGCTCAGAACGAACGCTGGCGGCAGGCTTAACACATGCAAGTCGAGCGCACTCTTTTTAGAGTGAGCGGCAAACGGGTGAGTAACGCGTGGGAATCTACCCATTTCTACGGAATAACACAGAGAAATTTGTGCTAATACCGTATACGTCCTATTGGAGAAAGATTTATCGGAGATGGATGAGCCCGCGTTGGATTAGCTAGTTGGTGAGGTAACGGCTCACCAAGGCGACGATCCATAGCTGGTCTGAGAGGATGATCAGCCACACTGGGACTGAGACACGGCCCAGACTCCTACGGGAGGCAGCAGTGGGGAATATTGGACAATGGGGGCAACCCTGATCCAGCCATGCCGCGTGAGTGATGAAGGCCCTAGGGTTG…
GCF_000314675.2	Afipia broomeae ATCC 49717	HMPREF9695_RS00705	Xanthobacteraceae	Afipia	Rhizobiales	TCCAACTTGAGAGTTTGATCCTGGCTCAGAGCGAACGCTGGCGGCAGGCTTAACACATGCAAGTCGAGCGGGCGTAGCAATACGTCAGCGGCAGACGGGTGAGTAACGCGTGGGAACGTACCTTTTGGTTCGGAACAACACAGGGAAACTTGTGCTAATACCGGATAAGCCCTTACGGGGAAAGATTTATCGCCGAAAGATCGGCCCGCGTCTGATTAGCTAGTTGGTGAGGTAACGGCTCACCAAGGCGACGATCAGTAGCTGGTCTGAGAGGATGATCAGCCACATTGGGACTGAGACACGGCCCAAACTCCTACGGGAGGCAGCAGTGGGGAATATTGGACAATGGGCGCAAGCCTGATCCAGCCATGCCGCGTGAGTGATGAAGGCCCTAGGGTT…
GCF_000314735.2	Afipia felis ATCC 53690	HMPREF9697_RS16875	Xanthobacteraceae	NA	Rhizobiales	TCCAACTTGAGAGTTTGATCCTGGCTCAGAGCGAACGCTGGCGGCAGGCTTAACACATGCAAGTCGAGCGGGCGTAGCAATACGTCAGCGGCAGACGGGTGAGTAACGCGTGGGAACATACCTTTTGGTTCGGAACAACACAGGGAAACTTGTGCTAATACCGAATAAGCCCTTACGGGGAAAGATTTATCGCCGAAAGATTGGCCCGCGTCTGATTAGCTTGTTGGTGAGGTAACGGCTCACCAAGGCGACGATCAGTAGCTGGTCTGAGAGGATGATCAGCCACATTGGGACTGAGACACGGCCCAAACTCCTACGGGAGGCAGCAGTGGGGAATATTGGACAATGGGCGCAAGCCTGATCCAGCCATGCCGCGTGAGTGATGAAGGCCCTAGGGTT…
GCF_000325745.1	Liberibacter crescens BT-1	B488_RS06585	Rhizobiaceae	Candidatus Liberibacter	Rhizobiales	GAACATGAGAGTTTGATCCTGGCTCAGAACGAACGCTGGCGGCAGGCTTAACACATGCAAGTCGAGCGCGTATTTATACGAGCGGCAGACGGGTGAGTAACGCGTGGGAATCTACCTTTTTCTACAGGATAACGCATGGAAACGTGTGCTAATACTGTATACGCCCTTTTGGGGAAAGATTTATTGGAGAGAGATGAGCCCGCGTTGGATTAGCTAGTTGGTGGGGTAAAGGCCTACCAAGGCGACGATCCATAGCTGGTCTGAGAGGATGATCAGCCACACTGGGACTGAGACACGGCCCAGACTCCTACGGGAGGCAGCAGTGGGGAATATTGGACAATGGGGGCAACCCTGATCCAGCCATGCCGCGTGAGTGAAGAAGGCCCTAGGGTTGTAAAG…
GCF_000325745.1	Liberibacter crescens BT-1	B488_RS01420	Rhizobiaceae	Candidatus Liberibacter	Rhizobiales	GAACATGAGAGTTTGATCCTGGCTCAGAACGAACGCTGGCGGCAGGCTTAACACATGCAAGTCGAGCGCGTATTTATACGAGCGGCAGACGGGTGAGTAACGCGTGGGAATCTACCTTTTTCTACAGGATAACGCATGGAAACGTGTGCTAATACTGTATACGCCCTTTTGGGGAAAGATTTATTGGAGAGAGATGAGCCCGCGTTGGATTAGCTAGTTGGTGGGGTAAAGGCCTACCAAGGCGACGATCCATAGCTGGTCTGAGAGGATGATCAGCCACACTGGGACTGAGACACGGCCCAGACTCCTACGGGAGGCAGCAGTGGGGAATATTGGACAATGGGGGCAACCCTGATCCAGCCATGCCGCGTGAGTGAAGAAGGCCCTAGGGTTGTAAAG…
GCF_000325745.1	Liberibacter crescens BT-1	B488_RS04770	Rhizobiaceae	Candidatus Liberibacter	Rhizobiales	GAACATGAGAGTTTGATCCTGGCTCAGAACGAACGCTGGCGGCAGGCTTAACACATGCAAGTCGAGCGCGTATTTATACGAGCGGCAGACGGGTGAGTAACGCGTGGGAATCTACCTTTTTCTACAGGATAACGCATGGAAACGTGTGCTAATACTGTATACGCCCTTTTGGGGAAAGATTTATTGGAGAGAGATGAGCCCGCGTTGGATTAGCTAGTTGGTGGGGTAAAGGCCTACCAAGGCGACGATCCATAGCTGGTCTGAGAGGATGATCAGCCACACTGGGACTGAGACACGGCCCAGACTCCTACGGGAGGCAGCAGTGGGGAATATTGGACAATGGGGGCAACCCTGATCCAGCCATGCCGCGTGAGTGAAGAAGGCCCTAGGGTTGTAAAG…
GCF_000330885.1	Rhizobium tropici CIAT 899	RTCIAT899_RS15980	Rhizobiaceae	Allorhizobium-Neorhizobium-Pararhizobium-Rhizobium	Rhizobiales	CAACATGAGAGTTTGATCCTGGCTCAGAACGAACGCTGGCGGCAGGCTTAACACATGCAAGTCGAGCGCCCCGCAAGGGGAGCGGCAGACGGGTGAGTAACGCGTGGGAATCTACCTTTTGCTACGGAATAACGCAGGGAAACTTGTGCTAATACCGTATGTGTCCTTCGGGAGAAAGATTTATCGGCAAGAGATGAGCCCGCGTTGGATTAGCTAGTTGGTGGGGTAAAGGCCTACCAAGGCGACGATCCATAGCTGGTCTGAGAGGATGATCAGCCACATTGGGACTGAGACACGGCCCAAACTCCTACGGGAGGCAGCAGTGGGGAATATTGGACAATGGGCGCAAGCCTGATCCAGCCATGCCGCGTGAGTGATGAAGGCCCTAGGGTTGTAAAG…
GCF_000330885.1	Rhizobium tropici CIAT 899	RTCIAT899_RS00820	Rhizobiaceae	Allorhizobium-Neorhizobium-Pararhizobium-Rhizobium	Rhizobiales	CAACATGAGAGTTTGATCCTGGCTCAGAACGAACGCTGGCGGCAGGCTTAACACATGCAAGTCGAGCGCCCCGCAAGGGGAGCGGCAGACGGGTGAGTAACGCGTGGGAATCTACCTTTTGCTACGGAATAACGCAGGGAAACTTGTGCTAATACCGTATGTGTCCTTCGGGAGAAAGATTTATCGGCAAGAGATGAGCCCGCGTTGGATTAGCTAGTTGGTGGGGTAAAGGCCTACCAAGGCGACGATCCATAGCTGGTCTGAGAGGATGATCAGCCACATTGGGACTGAGACACGGCCCAAACTCCTACGGGAGGCAGCAGTGGGGAATATTGGACAATGGGCGCAAGCCTGATCCAGCCATGCCGCGTGAGTGATGAAGGCCCTAGGGTTGTAAAG…
GCF_000330885.1	Rhizobium tropici CIAT 899	RTCIAT899_RS00310	Rhizobiaceae	Allorhizobium-Neorhizobium-Pararhizobium-Rhizobium	Rhizobiales	CAACATGAGAGTTTGATCCTGGCTCAGAACGAACGCTGGCGGCAGGCTTAACACATGCAAGTCGAGCGCCCCGCAAGGGGAGCGGCAGACGGGTGAGTAACGCGTGGGAATCTACCTTTTGCTACGGAATAACGCAGGGAAACTTGTGCTAATACCGTATGTGTCCTTCGGGAGAAAGATTTATCGGCAAGAGATGAGCCCGCGTTGGATTAGCTAGTTGGTGGGGTAAAGGCCTACCAAGGCGACGATCCATAGCTGGTCTGAGAGGATGATCAGCCACATTGGGACTGAGACACGGCCCAAACTCCTACGGGAGGCAGCAGTGGGGAATATTGGACAATGGGCGCAAGCCTGATCCAGCCATGCCGCGTGAGTGATGAAGGCCCTAGGGTTGTAAAG…
GCF_000336555.1	Afipia clevelandensis ATCC 49720	HMPREF9696_RS18515	Xanthobacteraceae	Afipia	Rhizobiales	TCCAACTTGAGAGTTTGATCCTGGCTCAGAGCGAACGCTGGCGGCAGGCTTAACACATGCAAGTCGAACGGGCGTAGCAATACGTCAGTGGCAGACGGGTGAGTAACGCGTGGGAACGTACCTTTTGGTTCGGAACAACACAGGGAAACTTGTGCTAATACCGGATAAGCCCTTACGGGGAAAGATTTATCGCCGAAAGATCGGCCCGCGTCTGATTAGCTAGTTGGTGAGGTAACGGCTCACCAAGGCGACGATCAGTAGCTGGTCTGAGAGGATGATCAGCCACATTGGGACTGAGACACGGCCCAAACTCCTACGGGAGGCAGCAGTGGGGAATATTGGACAATGGGGGCAACCCTGATCCAGCCATGCCGCGTGAGTGATGAAGGCCCTAGGGTT…
GCF_000341355.1	Bartonella australis Aust/NH1	BANH1_RS05410	Rhizobiaceae	Bartonella	Rhizobiales	TCAATTTGAGAGTTTGATCCTGGCTCAGAACGAACGCTGGCGGCAGGCTTAACACATGCAAGTCGAGCGCACTTTTTAAGTGAGCGGCAGACGGGTGAGTAACGCGTGGGAATCTACCCATTTCTACGGAATAACACAGAGAAATTTGTGCTAATACCGTATACGTCCTTCGGGAGAAAGATTTATCGGAGATGGATGAGCCCGCGTTGGATTAGCTAGTTGGTGGGGTAAAAGCTCACCAAGGCGACGATCCATAGCTGGTCTGAGAGGATGATCAGCCACACTGGGACTGAGACACGGCCCAGACTCCTACGGGAGGCAGCAGTGGGGAATATTGGACAATGGGGGCAACCCTGATCCAGCCATGCCGCGTGAGTGATGAAGGCCCTAGGGTTGTAA…
GCF_000341355.1	Bartonella australis Aust/NH1	BANH1_RS05850	Rhizobiaceae	Bartonella	Rhizobiales	TCAATTTGAGAGTTTGATCCTGGCTCAGAACGAACGCTGGCGGCAGGCTTAACACATGCAAGTCGAGCGCACTTTTTAAGTGAGCGGCAGACGGGTGAGTAACGCGTGGGAATCTACCCATTTCTACGGAATAACACAGAGAAATTTGTGCTAATACCGTATACGTCCTTCGGGAGAAAGATTTATCGGAGATGGATGAGCCCGCGTTGGATTAGCTAGTTGGTGGGGTAAAAGCTCACCAAGGCGACGATCCATAGCTGGTCTGAGAGGATGATCAGCCACACTGGGACTGAGACACGGCCCAGACTCCTACGGGAGGCAGCAGTGGGGAATATTGGACAATGGGGGCAACCCTGATCCAGCCATGCCGCGTGAGTGATGAAGGCCCTAGGGTTGTAA…
GCF_000344805.1	Bradyrhizobium oligotrophicum S58	S58_RS13900	Xanthobacteraceae	Bradyrhizobium	Rhizobiales	CAACTTGAGAGTTTGATCCTGGCTCAGAGCGAACGCTGGCGGCAGGCTTAACACATGCAAGTCGAGCGGGCGTAGCAATACGTCAGCGGCAGACGGGTGAGTAACGCGTGGGAACGTACCTTTTGGTTCGGAACAACACAGGGAAACTTGTGCTAATACCGGATAAGCCCTTACGGGGAAAGATTTATCGCCGAAAGATCGGCCCGCGTCTGATTAGCTAGTTGGTGGGGTAATGGCCCACCAAGGCGACGATCAGTAGCTGGTCTGAGAGGATGATCAGCCACATTGGGACTGAGACACGGCCCAAACTCCTACGGGAGGCAGCAGTGGGGAATATTGGACAATGGGGGCAACCCTGATCCAGCCATGCCGCGTGAGTGATGAAGGCCCTAGGGTTGT…
GCF_000344805.1	Bradyrhizobium oligotrophicum S58	S58_RS32125	Xanthobacteraceae	Bradyrhizobium	Rhizobiales	CAACTTGAGAGTTTGATCCTGGCTCAGAGCGAACGCTGGCGGCAGGCTTAACACATGCAAGTCGAGCGGGCGTAGCAATACGTCAGCGGCAGACGGGTGAGTAACGCGTGGGAACGTACCTTTTGGTTCGGAACAACACAGGGAAACTTGTGCTAATACCGGATAAGCCCTTACGGGGAAAGATTTATCGCCGAAAGATCGGCCCGCGTCTGATTAGCTAGTTGGTGGGGTAATGGCCCACCAAGGCGACGATCAGTAGCTGGTCTGAGAGGATGATCAGCCACATTGGGACTGAGACACGGCCCAAACTCCTACGGGAGGCAGCAGTGGGGAATATTGGACAATGGGGGCAACCCTGATCCAGCCATGCCGCGTGAGTGATGAAGGCCCTAGGGTTGT…
GCF_000350085.1	Mesorhizobium metallidurans STM 2683	MESS2_RS10400	Rhizobiaceae	Mesorhizobium	Rhizobiales	AACTTGAGAGTTTGATCCTGGCTCAGAACGAACGCTGGCGGCAGGCTTAACACATGCAAGTCGAGCGCCTCGCAAGAGGAGCGGCAGACGGGTGAGTAACGCGTGGGAATCTACCCATCTCTACGGAACAACTCCGGGAAACTGGAGCTAATACCGTATACGTCCTTCGGGAGAAAGATTTATCGGAGATGGATGAGCCCGCGTTGGATTAGCTAGTTGGTGGGGTAATGGCCTACCAAGGCGACGATCCATAGCTGGTCTGAGAGGATGATCAGCCACATTGGGACTGAGACACGGCCCAAACTCCTACGGGAGGCAGCAGTGGGGAATATTGGACAATGGGCGAAAGCCTGATCCAGCCATGCCGCGTGAGTGATGAAGGCCCTAGGGTTGTAAAGC…
GCF_000359745.1	Rhizobium freirei PRF 81	RHSP_RS29345	Rhizobiaceae	Allorhizobium-Neorhizobium-Pararhizobium-Rhizobium	Rhizobiales	CAACATGAGAGTTTGATCCTGGCTCAGAACGAACGCTGGCGGCAGGCTTAACACATGCAAGTCGAGCGCCCCGCAAGGGGAGCGGCAGACGGGTGAGTAACGCGTGGGAATCTACCTTTTGCTACGGAATAACGCAGGGAAACTTGTGCTAATACCGTATGTGTCCTTCGGGAGAAAGATTTATCGGCAAGAGATGAGCCCGCGTTGGATTAGCTAGTTGGTGGGGTAAAGGCCTACCAAGGCGACGATCCATAGCTGGTCTGAGAGGATGATCAGCCACATTGGGACTGAGACACGGCCCAAACTCCTACGGGAGGCAGCAGTGGGGAATATTGGACAATGGGCGCAAGCCTGATCCAGCCATGCCGCGTGAGTGATGAAGGCCCTAGGGTTGTAAAG…
GCF_000359745.1	Rhizobium freirei PRF 81	RHSP_RS14110	Rhizobiaceae	Allorhizobium-Neorhizobium-Pararhizobium-Rhizobium	Rhizobiales	CAACATGAGAGTTTGATCCTGGCTCAGAACGAACGCTGGCGGCAGGCTTAACACATGCAAGTCGAGCGCCCCGCAAGGGGAGCGGCAGACGGGTGAGTAACGCGTGGGAATCTACCTTTTGCTACGGAATAACGCAGGGAAACTTGTGCTAATACCGTATGTGTCCTTCGGGAGAAAGATTTATCGGCAAGAGATGAGCCCGCGTTGGATTAGCTAGTTGGTGGGGTAAAGGCCTACCAAGGCGACGATCCATAGCTGGTCTGAGAGGATGATCAGCCACATTGGGACTGAGACACGGCCCAAACTCCTACGGGAGGCAGCAGTGGGGAATATTGGACAATGGGCGCAAGCCTGATCCAGCCATGCCGCGTGAGTGATGAAGGCCCTAGGGTTGTAAAG…
GCF_000359745.1	Rhizobium freirei PRF 81	RHSP_RS29875	Rhizobiaceae	Allorhizobium-Neorhizobium-Pararhizobium-Rhizobium	Rhizobiales	CAACATGAGAGTTTGATCCTGGCTCAGAACGAACGCTGGCGGCAGGCTTAACACATGCAAGTCGAGCGCCCCGCAAGGGGAGCGGCAGACGGGTGAGTAACGCGTGGGAATCTACCTTTTGCTACGGAATAACGCAGGGAAACTTGTGCTAATACCGTATGTGTCCTTCGGGAGAAAGATTTATCGGCAAGAGATGAGCCCGCGTTGGATTAGCTAGTTGGTGGGGTAAAGGCCTACCAAGGCGACGATCCATAGCTGGTCTGAGAGGATGATCAGCCACATTGGGACTGAGACACGGCCCAAACTCCTACGGGAGGCAGCAGTGGGGAATATTGGACAATGGGCGCAAGCCTGATCCAGCCATGCCGCGTGAGTGATGAAGGCCCTAGGGTTGTAAAG…
GCF_000369945.1	Brucella abortus 544	B977_RS109520	Rhizobiaceae	Brucella	Rhizobiales	TCAACTTGAGAGTTTGATCCTGGCTCAGAACGAACGCTGGCGGCAGGCTTAACACATGCAAGTCGAGCGCCCCGCAAGGGGAGCGGCAGACGGGTGAGTAACGCGTGGGAACGTACCATTTGCTACGGAATAACTCAGGGAAACTTGTGCTAATACCGTATGTGCCCTTCGGGGGAAAGATTTATCGGCAAATGATCGGCCCGCGTTGGATTAGCTAGTTGGTGGGGTAAAGGCTCACCAAGGCGACGATCCATAGCTGGTCTGAGAGGATGATCAGCCACACTGGGACTGAGACACGGCCCAGACTCCTACGGGAGGCAGCAGTGGGGAATATTGGACAATGGGCGCAAGCCTGATCCAGCCATGCCGCGTGAGTGATGAAGGCCCTAGGGTTGTAAA…
GCF_000369945.1	Brucella abortus 544	B977_RS119450	Rhizobiaceae	Brucella	Rhizobiales	TCAACTTGAGAGTTTGATCCTGGCTCAGAACGAACGCTGGCGGCAGGCTTAACACATGCAAGTCGAGCGCCCCGCAAGGGGAGCGGCAGACGGGTGAGTAACGCGTGGGAACGTACCATTTGCTACGGAATAACTCAGGGAAACTTGTGCTAATACCGTATGTGCCCTTCGGGGGAAAGATTTATCGGCAAATGATCGGCCCGCGTTGGATTAGCTAGTTGGTGGGGTAAAGGCTCACCAAGGCGACGATCCATAGCTGGTCTGAGAGGATGATCAGCCACACTGGGACTGAGACACGGCCCAGACTCCTACGGGAGGCAGCAGTGGGGAATATTGGACAATGGGCGCAAGCCTGATCCAGCCATGCCGCGTGAGTGATGAAGGCCCTAGGGTTGTAAA…
GCF_000369945.1	Brucella abortus 544	B977_RS118500	Rhizobiaceae	Brucella	Rhizobiales	TCAACTTGAGAGTTTGATCCTGGCTCAGAACGAACGCTGGCGGCAGGCTTAACACATGCAAGTCGAGCGCCCCGCAAGGGGAGCGGCAGACGGGTGAGTAACGCGTGGGAACGTACCATTTGCTACGGAATAACTCAGGGAAACTTGTGCTAATACCGTATGTGCCCTTCGGGGGAAAGATTTATCGGCAAATGATCGGCCCGCGTTGGATTAGCTAGTTGGTGGGGTAAAGGCTCACCAAGGCGACGATCCATAGCTGGTCTGAGAGGATGATCAGCCACACTGGGACTGAGACACGGCCCAGACTCCTACGGGAGGCAGCAGTGGGGAATATTGGACAATGGGCGCAAGCCTGATCCAGCCATGCCGCGTGAGTGATGAAGGCCCTAGGGTTGTAAA…
GCF_000369945.1	Brucella abortus 544	B977_RS109560	Rhizobiaceae	Brucella	Rhizobiales	TCAACTTGAGAGTTTGATCCTGGCTCAGAACGAACGCTGGCGGCAGGCTTAACACATGCAAGTCGAGCGCCCCGCAAGGGGAGCGGCAGACGGGTGAGTAACGCGTGGGAACGTACCATTTGCTACGGAATAACTCAGGGAAACTTGTGCTAATACCGTATGTGCCCTTCGGGGGAAAGATTTATCGGCAAATGATCGGCCCGCGTTGGATTAGCTAGTTGGTGGGGTAAAGGCTCACCAAGGCGACGATCCATAGCTGGTCTGAGAGGATGATCAGCCACACTGGGACTGAGACACGGCCCAGACTCCTACGGGAGGCAGCAGTGGGGAATATTGGACAATGGGCGCAAGCCTGATCCAGCCATGCCGCGTGAGTGATGAAGGCCCTAGGGTTGTAAA…
GCF_000372845.1	Methylocystis rosea SV97	A3OO_RS0112205	Beijerinckiaceae	Methylocystis	Rhizobiales	TCAAACTTGAGAGTTTGATCCTGGCTCAGAACGAACGCTGGCGGCAGGCCTAACACATGCAAGTCGAACGCCCTAGCAATAGGGAGTGGCAGACGGGTGAGTAACGCGTGGGAACGTACCCTTCGGTCTGGAATAACCCAGGGAAACTTGGGCTAATACCGGATACGTGCGAGAGCAGAAAGATTTATCGCCGAAGGATCGGCCCGCGTCCGATTAGCTAGTTGGTGAGGTAAAAGCTCACCAAGGCGACGATCGGTAGCTGGTCTGAGAGGATGATCAGCCACACTGGGACTGAGACACGGCCCAGACTCCTACGGGAGGCAGCAGTGGGGAATATTGGACAATGGGCGAAAGCCTGATCCAGCCATGCCGCGTGAGTGATGAAGGCCCTAGGGTTGT…
GCF_000373025.1	Rhizobium gallicum bv. gallicum R602sp	B028_RS0122530	Rhizobiaceae	Allorhizobium-Neorhizobium-Pararhizobium-Rhizobium	Rhizobiales	CAACATGAGAGTTTGATCCTGGCTCAGAACGAACGCTGGCGGCAGGCTTAACACATGCAAGTCGAGCGCCCCGCAAGGGGAGCGGCAGACGGGTGAGTAACGCGTGGGAATCTACCCTTGACTACGGAATAACGCAGGGAAACTTGTGCTAATACCGTATGTGTCCTTCGGGAGAAAGATTTATCGGTCAAGGATGAGCCCGCGTTGGATTAGCTAGTTGGTGGGGTAAAGGCCTACCAAGGCGACGATCCATAGCTGGTCTGAGAGGATGATCAGCCACATTGGGACTGAGACACGGCCCAAACTCCTACGGGAGGCAGCAGTGGGGAATATTGGACAATGGGCGCAAGCCTGATCCAGCCATGCCGCGTGAGTGATGAAGGCCCTAGGGTTGTAAAG…
GCF_000374145.1	Neomegalonema perideroedes DSM 15528	B161_RS0112990	Unknown Family_3	Neomegalonema	Alphaproteobacteria Incertae Sedis	GGATTAAACTTGAGAGTTTGATCCTGGCTCAGAACGAACGCTGGCGGCAGGCCTAACACATGCAAGTCGAGCGCCCCGCAAGGGGAGCGGCGCACGGGTGAGTAACACGTGGGAACGTGCCTTTCAGTTCGGAACAACTCAGGGAAACTTGAGCTAATGCCGGATACGCCCTTCGGGGGAAAGATTTATCGCTGAAAGATCGGCCCGCGTTGGATTAGCTAGTTGGTGAGGTAACGGCTCACCAAGGCGACGATCCATAGCTGATCTGAGAGGATGATCAGCCACACTGGGACTGAGACACGGCCCAGACTCCTACGGGAGGCAGCAGTGGGGAATCTTGGACAATGGGCGCAAGCCTGATCCAGCCATGCCGCGTGAGTGATGAAGGTCTTCGGATTG…
GCF_000374525.1	Amorphus coralli DSM 19760	C507_RS0119870	Rhodobiaceae	Amorphus	Rhizobiales	AACCTGAGAGTTTGATCCTGGCTCAGAACGAACGCTGGCGGCAGGCTTAACACATGCAAGTCGAACGCACTCTTCGGAGTGAGTGGCAGACGGGTGAGTAACGCGTGGGAACCTACCTGGTGGTTCGGGATAACCTGGGGAAACTCAGGCTAATACCGAATAAGCCCTTCGGGGGAAAGATTTATTGCCATTGGACGGGCCCGCGTCGGATTAGCTAGTTGGTGAGGTAACGGCTCACCAAGGCTACGATCCGTAGCTGGTCTAAGAGGATGATCAGCCACACTGGGACTGAGACACGGCCCAGACTCCTACGGGAGGCAGCAGTGGGGAATATTGGACAATGGGGGCAACCCTGATCCAGCCATGCCGCGTGAGTGATGAAGGCCTTAGGGTTGTAAA…
GCF_000376125.1	Martelella mediterranea DSM 17316	B038_RS0126825	Rhizobiaceae	Martelella	Rhizobiales	TCAACTTGAGAGTTTGATCCTGGCTCAGGACGAACGCTGGCGGCAGGCTTAACACATGCAAGTCGAACGATCCTTCGGGATAGTGGCAGACGGGTGAGTAACGCGTGGGAATCTACCTTTTGGTACGGAATAGCTCCGGGAAACTGGAATTAATACCGTATGTGTCCTTCGGGAGAAAGATTTATCGCCAAGAGATGAGCCCGCGTTTGATTAGGTAGTTGGTGGGGTAATGGCCTACCAAGCCGACGATCAATAGCTGGTCTGAGAGGATGATCAGCCACATTGGGACTGAGACACGGCCCAAACTCCTACGGGAGGCAGCAGTGGGGAATATTGGACAATGGGCGCAAGCCTGATCCAGCCATGCCGCGTGAGTGATGAAGGCCCTAGGGTTGTAAA…
GCF_000379145.1	Bradyrhizobium elkanii USDA 76	BRAEL_RS0102110	Xanthobacteraceae	Bradyrhizobium	Rhizobiales	TCCAACTTGAGAGTTTGATCCTGGCTCAGAGCGAACGCTGGCGGCAGGCTTAACACATGCAAGTCGAGCGGGCATAGCAATATGTCAGCGGCAGACGGGTGAGTAACGCGTGGGAACGTACCTTTTGGTTCGGAACAACTGAGGGAAACTTCAGCTAATACCGGATAAGCCCTTACGGGGAAAGATTTATCGCCGAAAGATCGGCCCGCGTCTGATTAGCTAGTTGGTGAGGTAATGGCTCACCAAGGCGACGATCAGTAGCTGGTCTGAGAGGATGATCAGCCACATTGGGACTGAGACACGGCCCAAACTCCTACGGGAGGCAGCAGTGGGGAATATTGGACAATGGGCGCAAGCCTGATCCAGCCATGCCGCGTGAGTGATGAAGGCCCTAGGGTT…
GCF_000379605.1	Rhizobium giardinii bv. giardinii H152	A3AY_RS0126510	Rhizobiaceae	NA	Rhizobiales	TCAACTTGAGAGTTTGATCCTGGCTCAGAACGAACGCTGGCGGCAGGCTTAACACATGCAAGTCGAGCGCCCCGCAAGGGGAGCGGCAGACGGGTGAGTAACGCGTGGGAATCTACCCATCTCTACGGAATAACTCAGGGAAACTTGTGCTAATACCGTATACGCCCTTCGGGGGAAAGATTTATCGGAGATGGATGAGCCCGCGTTGGATTAGCTAGTTGGTGGGGTAAAGGCCTACCAAGGCGACGATCCATAGCTGGTCTGAGAGGATGATCAGCCACATTGGGACTGAGACACGGCCCAAACTCCTACGGGAGGCAGCAGTGGGGAATATTGGACAATGGGCGCAAGCCTGATCCAGCCATGCCGCGTGAGTGATGAAGGCCTTAGGGTTGTAAA…
GCF_000380505.1	Kaistia granuli DSM 23481	G342_RS0118290	Kaistiaceae	Kaistia	Rhizobiales	TCAATTTGAGAGTTTGATCCTGGCTCAGAACGAACGCTGGCGGCAGGCCTAACACATGCAAGTCGAACGCCCTAGCAATAGGGAGTGGCAGACGGGTGAGTAACGCGTGGGAATCTACCTTGTGGTACGGAACAACCAAGGGAAACTTTGGCTAATACCGTATGAGCCCTTCGGGGGAAAGATTTATCGCCATAAGATGAGCCCGCGTAGGATTAGCTAGTTGGTGAGGTAATGGCTCACCAAGGCGACGATCCTTAGCTGGTCTGAGAGGATGACCAGCCACACTGGGACTGAGACACGGCCCAGACTCCTACGGGAGGCAGCAGTGGGGAATATTGGACAATGGGCGCAAGCCTGATCCAGCCATGCCGCGTGTGTGATGAAGGCCTTAGGGTTGTA…
GCF_000383415.1	Hyphomicrobium zavarzinii ATCC 27496	F812_RS0100765	Hyphomicrobiaceae	Hyphomicrobium	Rhizobiales	CAATCTGAGAGTTTGATCCTGGCTCAGAACGAACGCTGGCGGCAGGCCTAACACATGCAAGTCGAACGCTGTAGCAATACAGAGTGGCAGACGGGTGAGTAACACGTGGGAATCTTCCTATCGGTACGGAATAGCTCAGGGAAACTTGGGGTAATACCGCATACGCCCTTCGGGGGAAAGATTTATCGCCGATAGATGAGCCCGCGTCTGATTAGCTAGTTGGTGAGGTAATGGCTCACCAAGGCGACGATCAGTAGCTGGTCTGAGAGGATGACCAGCCACACTGGGACTGAGACACGGCCCAGACTCCTACGGGAGGCAGCAGTGGGGAATATTGGACAATGGGCGCAAGCCTGATCCAGCCATGCCGCGTGAGTGACGAAGGTCTTCGGATTGTAA…
GCF_000384965.1	Bartonella bovis 91-4	BBBE_RS05210	Rhizobiaceae	Bartonella	Rhizobiales	TCAACTTGAGAGTTTGATCCTGGCTCAGAACGAACGCTGGCGGCAGGCTTAACACATGCAAGTCGAGCGCACTCTTTTAGAGTGAGCGGCAAACGGGTGAGTAACGCGTGGGAATCTACCCATCTCTACGGAATAACACAGAGAAATTTGTGCTAATGCCGTATACGTCCTAAGGGAGAAAGATTTATCGGAGATGGATGAGCCCGCGTTGGATTAGCTAGTTGGTGGGGTAAAGGCTCACCAAGGCGACGATCCATAGCTGGTCTGAGAGGATGATCAGCCACACTGGGACTGAGACACGGCCCAGACTCCTACGGGAGGCAGCAGTGGGGAATATTGGACAATGGGGGCAACCCTGATCCAGCCATGCCGCGTGAGTGATGAAGGCCCTAGGGTTGT…
GCF_000384965.1	Bartonella bovis 91-4	BBBE_RS05960	Rhizobiaceae	Bartonella	Rhizobiales	TCAACTTGAGAGTTTGATCCTGGCTCAGAACGAACGCTGGCGGCAGGCTTAACACATGCAAGTCGAGCGCACTCTTTTAGAGTGAGCGGCAAACGGGTGAGTAACGCGTGGGAATCTACCCATCTCTACGGAATAACACAGAGAAATTTGTGCTAATGCCGTATACGTCCTAAGGGAGAAAGATTTATCGGAGATGGATGAGCCCGCGTTGGATTAGCTAGTTGGTGGGGTAAAGGCTCACCAAGGCGACGATCCATAGCTGGTCTGAGAGGATGATCAGCCACACTGGGACTGAGACACGGCCCAGACTCCTACGGGAGGCAGCAGTGGGGAATATTGGACAATGGGGGCAACCCTGATCCAGCCATGCCGCGTGAGTGATGAAGGCCCTAGGGTTGT…
GCF_000385335.1	Methyloferula stellata AR4	A3OQ_RS0103795	Beijerinckiaceae	Methyloferula	Rhizobiales	CAACTTGAGAGTTTGATCCTGGCTCAGAACGAACGCTGGCGGCAGGCCTAACACATGCAAGTCGAACGCTGTAGCAATACAGAGTGGCAGACGGGTGAGTAACACGTGGGAACATGCCCTTCGGTTCGGAATAACTCAGGGAAACTTGAGCTAATACCGGATACGTCCGCGAGGAGAAAGATTTATCGCCGAAGGATTGGCCCGCGTCTGATTAGCTTGTTGGTGAGGTAATGGCTCACCAAGGCGACGATCAGTAGCTGGTCTGAGAGGATGATCAGCCACATTGGGACTGAGACACGGCCCAAACTCCTACGGGAGGCAGCAGTGGGGAATATTGGACAATGGGCGAAAGCCTGATCCAGCCATGCCGCGTGAGTGATGAAGGCCTTAGGGTTGTAA…
GCF_000419765.1	Rhizobium mongolense USDA 1844	A3C3_RS0137155	Rhizobiaceae	Allorhizobium-Neorhizobium-Pararhizobium-Rhizobium	Rhizobiales	CAACATGAGAGTTTGATCCTGGCTCAGAACGAACGCTGGCGGCAGGCTTAACACATGCAAGTCGAGCGCCCCGCAAGGGGAGCGGCAGACGGGTGAGTAACGCGTGGGAACGTACCCTTTACTACGGAATAACGCAGGGAAACTTGTGCTAATACCGTATGTGCCCTTCGGGGGAAAGATTTATCGGTAAGGGATCGGCCCGCGTTGGATTAGCTAGTTGGTGGGGTAAAGGCCTACCAAGGCGACGATCCATAGCTGGTCTGAGAGGATGATCAGCCACATTGGGACTGAGACACGGCCCAAACTCCTACGGGAGGCAGCAGTGGGGAATATTGGACAATGGGCGCAAGCCTGATCCAGCCATGCCGCGTGAGTGATGAAGGCCCTAGGGTTGTAAAG…
GCF_000421645.1	Aurantimonas coralicida DSM 14790	H536_RS0122140	Rhizobiaceae	Aurantimonas	Rhizobiales	AACCTGAGAGTTTGATCCTGGCTCAGAACGAACGCTGGCGGCAGGCTTAACACATGCAAGTCGAACGCATCCTTCGGGGTGAGTGGCAGACGGGTGAGTAACGCGTGGGAATCTACCCATCCCTACGGGATAGCTCCGGGAAACTGGAGATAATACCGTATACGTCCTCCGGGAGAAAGATTTATCGGGGATGGATGAGCCCGCGTTGGATTAGCTAGTTGGTGGGGTAATGGCCTACCAAGGCGACGATCCATAGCTGGTCTAAGAGGATGATCAGCCACATTGGGACTGAGACACGGCCCAAACTCCTACGGGAGGCAGCAGTGGGGAATATTGGACAATGGGCGCAAGCCTGATCCAGCCATGCCGCGTGAGTGATGAAGGCCCTAGGGTTGTAAA…
GCF_000422965.1	Pleomorphomonas oryzae DSM 16300	G522_RS0107695	Pleomorphomonadaceae	Pleomorphomonas	Rhizobiales	CTCTTGAACATGAGAGTTTGATCCTGGCTCAGAACGAACGCTGGCGGCAGGCTTAACACATGCAAGTCGAACGCTCGTAGCAATACGGGAGTGGCAGACGGGTGAGTAACGCGTGGGAACATACCCTTTGGTTCGGAATAACTGAGAGAAATTTCAGCTAATACCGGATGTGCCCTTCGGGGGAAAGATTTATCGCCAAAGGATTGGCCCGCGTCTGATTAGCTAGTTGGTGAGGTAACGGCTCACCAAGGCGACGATCAGTAGCTGGTCTGAGAGGATGATCAGCCACACTGGGACTGAGACACGGCCCAGACTCCTACGGGAGGCAGCAGTGGGGAA
GCF_000422965.1	Pleomorphomonas oryzae DSM 16300	G522_RS29590	NA	NA	NA	CTCTTGAACATGAGAGTTTGATCCTGGCTCAGAACGAACGCTGGCGGCAGGCTTAACACATG
GCF_000422965.1	Pleomorphomonas oryzae DSM 16300	G522_RS0119355	Pleomorphomonadaceae	Pleomorphomonas	Rhizobiales	CTCTTGAACATGAGAGTTTGATCCTGGCTCAGAACGAACGCTGGCGGCAGGCTTAACACATGCAAGTCGAACGCTCGTAGCAATACGGGAGTGGCAGACGGGTGAGTAACGCGTGGGAACATACCCTTTGGTTCGGAATAACTGAGAGAAATTTCAGCTAATACCGGATGTGCCCTTCGGGGGAAAGATTTATCGCCAAAGGATTGGCCCGCGTCTGATTAGCTAGTTGGTGAGGTAACGGCTCACCAAGGCGACGATCAGTAGCTGGTCTGAGAGGATGATCAGCCACACTGGGACTGAGACACGGCC
GCF_000422965.1	Pleomorphomonas oryzae DSM 16300	G522_RS0124045	Pleomorphomonadaceae	Pleomorphomonas	Rhizobiales	GAACATGAGAGTTTGATCCTGGCTCAGAACGAACGCTGGCGGCAGGCTTAACACATGCAAGTCGAACGCTCGTAGCAATACGGGAGTGGCAGACGGGTGAGTAACGCGTGGGAACATACCCTTTGGTTCGGAATAACTGAGAGAAATTTCAGCTAATACCGGATGTGCCCTTCGGGGGAAAGATTTATCGCCAAAGGATTGGCCCGCGTCTGATTAGCTAGTTGGTGAGGTAACGGCTCACCAAGGCGACGATCAGTAGCTGGTCTGAGAGGATGATCAGCCACACTGGGACTGAGACACGGCCCAGACTCCTACGGGAGGCAGCAGTGGGGAATATTGGACAATGGGGGCAACCCTGATCCAGCCATGCCGCGTGAGTGATGAAGGCCTTAGGGTTGT…
GCF_000423225.1	Kaistia adipata DSM 17808	G539_RS0100030	NA	NA	Rhizobiales	TTCAATTTGAGAGTTTGATCCTGGCTCAGAACGAACGCTGGCGGCAGGCCTAACACATGCAAGTCGAACGGTTCCTTCGGGGACAGTGGCAGACGGGTGAGTAACGC
GCF_000423225.1	Kaistia adipata DSM 17808	G539_RS0100055	Kaistiaceae	Kaistia	Rhizobiales	GCTTGCTCTTCGGTGGCGCAGCTAACGCATTAAGCATCCCGCCTGGGGAGTACGGTCGCAAGATTAAAACTCAAAGGAATTGACGGGGGCCCGCACAAGCGGTGGAGCATGTGGTTTAATTCGAAGCAACGCGCAGAACCTTACCAGCTCTTGACATGTCTCGTATGGGTACCGGAGACGGTATCCTTCAGTTCGGCTGGCGAGAACACAGGTGCTGCATGGCTGTCGTCAGCTCGTGTCGTGAGATGTTGGGTTAAGTCCCGCAACGAGCGCAACCCTCGCCTCTAGTTGCCATCATTCAGTTGGGCACTCTAGAGGGACTGCCGGTGATAAGCCGAGAGGAAGGTGGGGATGACGTCAAGTCCTCATGGCCCTTACGGGCTGGGCTACACACGTGCT…
GCF_000423365.1	Maritalea myrionectae DSM 19524	G549_RS0117465	Devosiaceae	Maritalea	Rhizobiales	AACTTGAGAGTTTGATCCTGGCTCAGAACGAACGCTGGCGGCAGGCTTAACACATGCAAGTCGAGCGCTCACTTCGGTGGGAGCGGCAGACGGGTGAGTAACGCGTGGGAACATACCTAGTAGTACGGAATAACGTTTGGAAACGAACGCTAATACCGTATACGCCCTTAGGGGGAAAGATTTATCGCTATTAGATTGGCCCGCGTTGGATTAGTTTGTTGGTGGGGTAATGGCCTACCAAGACTACGATCTATAGCTGGTCTGAGAGGATGATCAGCCACACTGGGACTGAGACACGGCCCAGACTCCTACGGGAGGCAGCAGTGGGGAATATTGGACAATGGGGGCAACCCTGATCCAGCCATGCCGCGTGAGTGATGAAGGCCTTAGGGTTGTAAA…
GCF_000425185.1	Pleomorphomonas koreensis DSM 23070	H512_RS25225	Pleomorphomonadaceae	Pleomorphomonas	Rhizobiales	GAGTAACACGTGGGAACATACCCTTTGGTTCGGAATAACTGAGAGAAATTTCAGCTAATACCGGATGAGCCCTTCGGGGGAAAGATTTATCGCCAAAGGATTGGCCCGCGTCTGATTAGGTAGTTGGTGAGGTAACGGCTCACCAAGCCGACGATCAGTAGCTGGTCTGAGAGGATGATCAGCCACACTGGGACTGAGACACGGCCCAGACTCCTACGGGAGGCAGCAGTGGGGAATATTGGACAATGGGGGCAACCCTGATCCAGCCATGCCGCGTGAGTGATGAAGGCCTTAGGGTTGTAAAGCTCTTTCGCTAGGGAAGATAATGACGGTACCTAGAGAAGAAGCCCCGGCTAACTTCGTGCCAGCAGCCGCGGTAATACGAAGGGGGCTAGCGTT…
GCF_000425185.1	Pleomorphomonas koreensis DSM 23070	H512_RS0114090	NA	NA	Rhizobiales	CTCTTGAACATGAGAGTTTGATCCTGGCTCAGAACGAACGCTGGCGGCAGGCTTAACACATGCAAGTCGAACGCTCGTAGCAATACGGGAGTGGCAGACGGGTGAGTAACACGTGGGAACATACCCTTTGGTTCGGAATAACT
GCF_000426285.1	Rhizobium leucaenae USDA 9039	K290_RS0133050	Rhizobiaceae	Allorhizobium-Neorhizobium-Pararhizobium-Rhizobium	Rhizobiales	CAACATGAGAGTTTGATCCTGGCTCAGAACGAACGCTGGCGGCAGGCTTAACACATGCAAGTCGAGCGCCCCTCCTTCAAGCAAGCTTGAAGGATTTACTCCTTGGAAAAGAAGATCAAGAGCGCTTCTAAGAAGCTTTCTTGATGGAGGGGAGCGGCAGACGGGTGAGTAACGCGTGGGAATCTACCCTTTTCTACGGAATAACGCAGGGAAACTTGTGCTAATACCGTATGTGTCCTTCGGGAGAAAGATTTATCGGGAAAGGATGAGCCCGCGTTGGATTAGCTAGTTGGTGGGGTAAAGGCCTACCAAGGCGACGATCCATAGCTGGTCTGAGAGGATGATCAGCCACATTGGGACTGAGACACGGCCCAAACTCCTACGGGAGGCAGCAGTGGG…
GCF_000427445.1	Methylocapsa acidiphila B2	METAC_RS0118350	Beijerinckiaceae	Methylocapsa	Rhizobiales	TCAACTTGAGAGTTTGATCCTGGCTCAGAACGAACGCTGGCGGCAGGCCTAACACATGCAAGTCGAACGCCCCGCAAGGGGAGTGGCAGACGGGTGAGTAACGCGTGGGAACATACCCTTCGGTTCGGAATAGCTCAGGGAAACTTGGATTAATACCGGATACGTCCGCAAGGAGAAAGATTTATCGCCGAAGGATTGGCCCGCGTCTGATTAGCTAGTTGGTGAGGTAATGGCTCACCAAGGCGACGATCAGTAGCTGGTCTGAGAGGATGATCAGCCACATTGGGACTGAGACACGGCCCAAACTCCTACGGGAGGCAGCAGTGGGGAATATTGGACAATGGGCGAAAGCCTGATCCAGCCATGCCGCGTGAGTGATGAAGGCCTTAGGGTTGTAAA…
GCF_000427445.1	Methylocapsa acidiphila B2	METAC_RS0116505	Beijerinckiaceae	Methylocapsa	Rhizobiales	TCAACTTGAGAGTTTGATCCTGGCTCAGAACGAACGCTGGCGGCAGGCCTAACACATGCAAGTCGAACGCCCCGCAAGGGGAGTGGCAGACGGGTGAGTAACGCGTGGGAACATACCCTTCGGTTCGGAATAGCTCAGGGAAACTTGGATTAATACCGGATACGTCCGCAAGGAGAAAGATTTATCGCCGAAGGATTGGCCCGCGTCTGATTAGCTAGTTGGTGAGGTAATGGCTCACCAAGGCGACGATCAGTAGCTGGTCTGAGAGGATGATCAGCCACATTGGGACTGAGACACGGCCCAAACTCCTACGGGAGGCAGCAGTGGGGAATATTGGACAATGGGCGAAAGCCTGATCCAGCCATGCCGCGTGAGTGATGAAGGCCTTAGGGTTGTAAA…
GCF_000427465.1	Sinorhizobium arboris LMG 14919	SINAR_RS0123300	Rhizobiaceae	Ensifer	Rhizobiales	TCAACTTGAGAGTTTGATCCTGGCTCAGAACGAACGCTGGCGGCAGGCTTAACACATGCAAGTCGAGCGCCCCGCAAGGGGAGCGGCAGACGGGTGAGTAACGCGTGGGAATCTACCCTTTTCTACGGAATAACGCAGGGAAACTTGTGCTAATACCGTATAAGCCCTTCGGGGGAAAGATTTATCGGGAAAGGATGAGCCCGCGTTGGATTAGCTAGTTGGTGGGGTAAAGGCCTACCAAGGCGACGATCCATAGCTGGTCTGAGAGGATGATCAGCCACATTGGGACTGAGACACGGCCCAAACTCCTACGGGAGGCAGCAGTGGGGAATATTGGACAATGGGCGCAAGCCTGATCCAGCCATGCCGCGTGAGTGATGAAGGCCCTAGGGTTGTAAA…
GCF_000427465.1	Sinorhizobium arboris LMG 14919	SINAR_RS0127415	Rhizobiaceae	Ensifer	Rhizobiales	TCAACTTGAGAGTTTGATCCTGGCTCAGAACGAACGCTGGCGGCAGGCTTAACACATGCAAGTCGAGCGCCCCGCAAGGGGAGCGGCAGACGGGTGAGTAACGCGTGGGAATCTACCCTTTTCTACGGAATAACGCAGGGAAACTTGTGCTAATACCGTATAAGCCCTTCGGGGGAAAGATTTATCGGGAAAGGATGAGCCCGCGTTGGATTAGCTAGTTGGTGGGGTAAAGGCCTACCAAGGCGACGATCCATAGCTGGTCTGAGAGGATGATCAGCCACATTGGGACTGAGACACGGCCCAAACTCCTACGGGAGGCAGCAGTGGGGAATATTGGACAATGGGCGCAAGCCTGATCCAGCCATGCCGCGTGAGTGATGAAGGCCCTAGGGTTGTAAA…
GCF_000427465.1	Sinorhizobium arboris LMG 14919	SINAR_RS0125375	Rhizobiaceae	Ensifer	Rhizobiales	TCAACTTGAGAGTTTGATCCTGGCTCAGAACGAACGCTGGCGGCAGGCTTAACACATGCAAGTCGAGCGCCCCGCAAGGGGAGCGGCAGACGGGTGAGTAACGCGTGGGAATCTACCCTTTTCTACGGAATAACGCAGGGAAACTTGTGCTAATACCGTATAAGCCCTTCGGGGGAAAGATTTATCGGGAAAGGATGAGCCCGCGTTGGATTAGCTAGTTGGTGGGGTAAAGGCCTACCAAGGCGACGATCCATAGCTGGTCTGAGAGGATGATCAGCCACATTGGGACTGAGACACGGCCCAAACTCCTACGGGAGGCAGCAGTGGGGAATATTGGACAATGGGCGCAAGCCTGATCCAGCCATGCCGCGTGAGTGATGAAGGCCCTAGGGTTGTAAA…
GCF_000429045.1	Salinarimonas rosea DSM 21201	G407_RS0105175	Beijerinckiaceae	Salinarimonas	Rhizobiales	CATCTCTTCAACGTGAGAGTTTGATCCTGGCTCAGAGCGAACGCTGGCGGCAGGCTTAACACATGCAAGTCGAACGCACCTTCGGGTGAGTGGCAGACGGGTGAGTAACGCGTGGGAACGTGCCCATCGGTTCGGAATAACCAAGGGAAACTTTGGCTAATACC
GCF_000429045.1	Salinarimonas rosea DSM 21201	G407_RS31090	NA	NA	NA	CATCTCTTCAACGTGAGAGTTTGATCCTGGCTCAGAGCGAACGCTGGCGGCAGGCTTAACACATG
GCF_000429045.1	Salinarimonas rosea DSM 21201	G407_RS0121310	Beijerinckiaceae	Salinarimonas	Rhizobiales	CATCTCTTCAACGTGAGAGTTTGATCCTGGCTCAGAGCGAACGCTGGCGGCAGGCTTAACACATGCAAGTCGAACGCACCTTCGGGTGAGTGGCAGACGGGTGAGTAACGCGTGGGAACGTGCCCATCGGTTCGGAATAACCAAGGGAAACTTTGGCTAATACCGGATACGTGCGAGAGCAGAAAGATTTATCGCCGATGGATCGGCCCGCGTCCGATTAGCTAGTTGGTGAGGTAACGGCTCACCAAGGCGACGATCGGTAGCTGGTCTGAGAGGATGATCAGCCACACTGGGACTGAGACACGGCCCAGACTCCTACGGGAGGCAGCAGTGGGGAATATTGGACAATGGGCGCAAGCCTGATCCAGCCATGCCGCGTGAGTGATGAAGGCCTTAGGG…
GCF_000429045.1	Salinarimonas rosea DSM 21201	G407_RS0117545	Beijerinckiaceae	Salinarimonas	Rhizobiales	CATCTCTTCAACGTGAGAGTTTGATCCTGGCTCAGAGCGAACGCTGGCGGCAGGCTTAACACATGCAAGTCGAACGCACCTTCGGGTGAGTGGCAGACGGGTGAGTAACGCGTGGGAACGTGCCCATCGGTTCGGAATAACCAAGGGAAACTTTGGCTAATACCGGATACGTGCGAGAGCAGAAAGATTTATCGCCGATGGATCGGCCCGCGTCC
GCF_000429865.1	Cucumibacter marinus DSM 18995	G489_RS0116175	Devosiaceae	Cucumibacter	Rhizobiales	AACTTGAGAGTTTGATCCTGGCTCAGAACGAACGCTGGCGGCAGGCCTAACACATGCAAGTCGAACGCACCTTCGGGTGAGTGGCAGACGGGTGAGTAACGCGTGGGAATCTACCCATCCCTACGGAATAGCTCCGGGAAACTGGAATTAATACCGTATACGCCCTTCGGGGGAAAGATTCATCGGGGTTGGATGAGCCCGCGTTAGATTAGCTAGTTGGTGGGGTAAAGGCCTACCAAGGCGACGATCTATAGCTGGTCTGAGAGGATGATCAGCCACACTGGGACTGAGACACGGCCCAGACTCCTACGGGAGGCAGCAGTGGGGAATATTGGACAATGGGCGCAAGCCTGATCCAGCCATGCCGCGTGAGTGATGAAGGCCCTAGGGTTGTAAAGC…
GCF_000472705.1	Mesorhizobium erdmanii USDA 3471	A3AU_RS0117520	Rhizobiaceae	Mesorhizobium	Rhizobiales	AACTTGAGAGTTTGATCCTGGCTCAGAACGAACGCTGGCGGCAGGCTTAACACATGCAAGTCGAGCGCCCCGCAAGGGGAGCGGCAGACGGGTGAGTAACGCGTGGGAATCTACCCATCTCTACGGAACAACTCCGGGAAACTGGAGCTAATACCGTATACGTCCTTTTGGAGAAAGATTTATCGGAGATGGATGAGCCCGCGTTGGATTAGCTAGTTGGTGGGGTAATGGCCTACCAAGGCGACGATCCATAGCTGGTCTGAGAGGATGATCAGCCACACTGGGACTGAGACACGGCCCAGACTCCTACGGGAGGCAGCAGTGGGGAATATTGGACAATGGGCGCAAGCCTGATCCAGCCATGCCGCGTGAGTGATGAAGGCCCTAGGGTTGTAAAGC…
GCF_000472705.1	Mesorhizobium erdmanii USDA 3471	A3AU_RS0119110	Rhizobiaceae	Mesorhizobium	Rhizobiales	AACTTGAGAGTTTGATCCTGGCTCAGAACGAACGCTGGCGGCAGGCTTAACACATGCAAGTCGAGCGCCCCGCAAGGGGAGCGGCAGACGGGTGAGTAACGCGTGGGAATCTACCCATCTCTACGGAACAACTCCGGGAAACTGGAGCTAATACCGTATACGTCCTTTTGGAGAAAGATTTATCGGAGATGGATGAGCCCGCGTTGGATTAGCTAGTTGGTGGGGTAATGGCCTACCAAGGCGACGATCCATAGCTGGTCTGAGAGGATGATCAGCCACACTGGGACTGAGACACGGCCCAGACTCCTACGGGAGGCAGCAGTGGGGAATATTGGACAATGGGCGCAAGCCTGATCCAGCCATGCCGCGTGAGTGATGAAGGCCCTAGGGTTGTAAAGC…
GCF_000472985.1	Bradyrhizobium japonicum USDA 6	YUI_RS0119150	Xanthobacteraceae	Bradyrhizobium	Rhizobiales	TCCAACTTGAGAGTTTGATCCTGGCTCAGAGCGAACGCTGGCGGCAGGCTTAACACATGCAAGTCGAGCGGGCGTAGCAATACGTCAGCGGCAGACGGGTGAGTAACGCGTGGGAACGTACCTTTTGGTTCGGAACAACACAGGGAAACTTGTGCTAATACCGGATAAGCCCTTACGGGGAAAGATTTATCGCCGAAAGATCGGCCCGCGTCTGATTAGCTAGTTGGTGAGGTAATGGCTCACCAAGGCGACGATCAGTAGCTGGTCTGAGAGGATGATCAGCCACATTGGGACTGAGACACGGCCCAAACTCCTACGGGAGGCAGCAGTGGGGAATATTGGACAATGGGGGCAACCCTGATCCAGCCATGCCGCGTGAGTGATGAAGGCCCTAGGGTT…
GCF_000472985.1	Bradyrhizobium japonicum USDA 6	YUI_RS0114360	Xanthobacteraceae	Bradyrhizobium	Rhizobiales	TCCAACTTGAGAGTTTGATCCTGGCTCAGAGCGAACGCTGGCGGCAGGCTTAACACATGCAAGTCGAGCGGGCGTAGCAATACGTCAGCGGCAGACGGGTGAGTAACGCGTGGGAACGTACCTTTTGGTTCGGAACAACACAGGGAAACTTGTGCTAATACCGGATAAGCCCTTACGGGGAAAGATTTATCGCCGAAAGATCGGCCCGCGTCTGATTAGCTAGTTGGTGAGGTAATGGCTCACCAAGGCGACGATCAGTAGCTGGTCTGAGAGGATGATCAGCCACATTGGGACTGAGACACGGCCCAAACTCCTACGGGAGGCAGCAGTGGGGAATATTGGACAATGGGGGCAACCCTGATCCAGCCATGCCGCGTGAGTGATGAAGGCCCTAGGGTT…
GCF_000473085.1	Azorhizobium doebereinerae UFLA1-100	YU1_RS0124165	Xanthobacteraceae	Azorhizobium	Rhizobiales	CAACTTGAGAGTTTGATCCTGGCTCAGAGCGAACGCTGGCGGCAGGCCTAACACATGCAAGTCGAGCGCCCAGCAATGGGAGCGGCAGACGGGTGAGTAACGCGTGGGGATCTGCCCAATGGTACGGAATAACCCAGGGAAACTTGGATTAATACCGTATGTGCCCTTCGGGGGAAAGATTTATCGCCATTGGATGAACCCGCGTCGGATTAGCTAGTTGGTGTGGTAAAGGCGCACCAAGGCGACGATCCGTAGCTGGTCTGAGAGGATGATCAGCCACACTGGGACTGAGACACGGCCCAGACTCCTACGGGAGGCAGCAGTGGGGAATATTGGACAATGGGCGCAAGCCTGATCCAGCCATGCCGCGTGTGTGATGAAGGCCTTAGGGTTGTAAAG…
GCF_000473085.1	Azorhizobium doebereinerae UFLA1-100	YU1_RS0108180	Xanthobacteraceae	Azorhizobium	Rhizobiales	CAACTTGAGAGTTTGATCCTGGCTCAGAGCGAACGCTGGCGGCAGGCCTAACACATGCAAGTCGAGCGCCCAGCAATGGGAGCGGCAGACGGGTGAGTAACGCGTGGGGATCTGCCCAATGGTACGGAATAACCCAGGGAAACTTGGATTAATACCGTATGTGCCCTTCGGGGGAAAGATTTATCGCCATTGGATGAACCCGCGTCGGATTAGCTAGTTGGTGTGGTAAAGGCGCACCAAGGCGACGATCCGTAGCTGGTCTGAGAGGATGATCAGCCACACTGGGACTGAGACACGGCCCAGACTCCTACGGGAGGCAGCAGTGGGGAATATTGGACAATGGGCGCAAGCCTGATCCAGCCATGCCGCGTGTGTGATGAAGGCCTTAGGGTTGTAAAG…
GCF_000496075.1	Lutibaculum baratangense AMV1	N177_RS09940	Lutibaculaceae	Lutibaculum	Rhizobiales	TCAATCTGAGAGTTTGATCCTGGCTCAGGACGAACGCTGGCGGCAGGCTTAACACATGCAAGTCGAGCGCCCTCTTCGGAGGGAGCGGCAGACGGGTGAGTAACGCGTGGGAACCTACCTGGTGGTACGGAATAACCCGGGGAAACTCGGGCTAATACCGCATACGCCCTTCGGGGGAAAGATTTATCGCCATCAGATGGGCCCGCGTCGGATTAGCTAGTTGGTGAGGTAACGGCTCACCAAGGCGACGATCCGTAGCTGGTCTGAGAGGATGATCAGCCACACTGGGACTGAGACACGGCCCAGACTCCTACGGGAGGCAGCAGTGGGGAATATTGGACAATGGGCGCAAGCCTGATCCAGCCATGCCGCGTGAGTGATGAAGGCCCTAGGGTTGTA…
GCF_000503895.1	Hyphomicrobium nitrativorans NL23	W911_RS03200	Hyphomicrobiaceae	Hyphomicrobium	Rhizobiales	CAATTTGAGAGTTTGATCCTGGCTCAGAACGAACGCTGGCGGCAGGCCTAACACATGCAAGTCGAACGCTGTAGCAATACAGAGTGGCAGACGGGTGAGTAACACGTGGGAATCTTCCTATCGGTACGGAATAGCTCAGGGAAACTTGGGGTAATACCGCATACGCCCTTCGGGGGAAAGATTTATCGCCGATAGACGAGCCCGCGTCTGATTAGCTAGTTGGTGAGGTAATGGCTCACCAAGGCGACGATCAGTAGCTGGTCTGAGAGGATGATCAGCCACACTGGGACTGAGACACGGCCCAGACTCCTACGGGAGGCAGCAGTGGGGAATATTGGACAATGGGCGAAAGCCTGATCCAGCCATGCCGCGTGAGTGACGAAGGTCTTCGGATTGTAA…
GCF_000518085.1	Bartonella grahamii ATCC 700132	U736_RS0107150	Rhizobiaceae	Bartonella	Rhizobiales	TCAATATGAGAGTTTGATCCTGGCTCAGAACGAACGCTGGCGGCAGGCTTAACACATGCAAGTCGAGCGCACTCTTTTAGAGTGAGCGGCAAACGGGTGAGTAACGCGTGGGAATCTACCCATCTCTACGGAATAACACAGAGAAATTTGTGCTAATACCGTATACGTCCTTTTTGGAGAAAGATTTATCGGAGATGGATGAGCCCGCGTTGGATTAGCTAGTTGGTGAGGTAACGGCTCACCAAGGCGACGATCCATAGCTGGTCTGAGAGGATGATCAGCCACACTGGGACTGAGACACGGCCCAGACTCCTACGGGAGGCAGCAGTGGGGAATATTGGACAATGGGGGCAACCCTGATCCAGCCATGCCGCGTGAGTGATGAAGGCCCTAGGGTTG…
GCF_000518085.1	Bartonella grahamii ATCC 700132	U736_RS0107695	NA	NA	NA	TGGGGTGAAGTCGTAACAAGGTAGCCGTAGGGGAACCTGTGGCTGGATCACCTCCTTTCTAAGGA
GCF_000518085.1	Bartonella grahamii ATCC 700132	U736_RS0107950	NA	NA	NA	TGGGGTGAAGTCGTAACAAGGTAGCCGTAGGGGAACCTGTGGCTGGATCACCTCCTTTCTAAGGA
GCF_000518085.1	Bartonella grahamii ATCC 700132	U736_RS0107900	Rhizobiaceae	Bartonella	Rhizobiales	TCAATATGAGAGTTTGATCCTGGCTCAGAACGAACGCTGGCGGCAGGCTTAACACATGCAAGTCGAGCGCACTCTTTTAGAGTGAGCGGCAAACGGGTGAGTAACGCGTGGGAATCTACCCATCTCTACGGAATAACACAGAGAAATTTGTGCTAATACCGTATACGTCCTTTTTGGAGAAAGATTTATCGGAGATGGATGAGCCCGCGTTGGATTAGCTAGTTGGTGAGGTAACGGCTCACCAAGGCGACGATCCATAGCTGGTCTGAGAGGATGATCAGCCACACTGGGACTGAGACACGGCCCAGACTCCTACGGGAGGCAGCAGTGGGGAATATTGGACAATGGGGGCAACCCTGATCCAGCCATGCCGCGTGAGTGATGAAGGCCCTAGGGTTG…
GCF_000518105.1	Bartonella vinsonii subsp. berkhoffii ATCC 51672	T437_RS0104915	Rhizobiaceae	Bartonella	Rhizobiales	TCAATATGAGAGTTTGATCCTGGCTCAGAACGAACGCTGGCGGCAGGCTTAACACATGCAAGTCGAGCGCACTCTTTTAGAGTGAGCGGCAAACGGGTGAGTAACGCGTGGGAATCTACCCCTCTCTACGGAATAACACAGAGAAATTTGTGCTAATACCGTATACGTCCCACAGGGAGACCTTTGGGAGAAAGATTTATCGGAGATGGATGAGCCCGCGTTGGATTAGCTAGTTGGTGAGGTAAAGGCTTACCAAGGCGACGATCCATAGCTGGTCTGAGAGGATGATCAGCCACACTGGGACTGAGACACGGCCCAGACTCCTACGGGAGGCAGCAGTGGGGAATATTGGACAATGGGGGCAACCCTGATCCAGCCATGCCGCGTGAGTGATGAAGG…
GCF_000518105.1	Bartonella vinsonii subsp. berkhoffii ATCC 51672	T437_RS0105630	Rhizobiaceae	Bartonella	Rhizobiales	TCAATATGAGAGTTTGATCCTGGCTCAGAACGAACGCTGGCGGCAGGCTTAACACATGCAAGTCGAGCGCACTCTTTTAGAGTGAGCGGCAAACGGGTGAGTAACGCGTGGGAATCTACCCCTCTCTACGGAATAACACAGAGAAATTTGTGCTAATACCGTATACGTCCCACAGGGAGACCTTTGGGAGAAAGATTTATCGGAGATGGATGAGCCCGCGTTGGATTAGCTAGTTGGTGAGGTAAAGGCTTACCAAGGCGACGATCCATAGCTGGTCTGAGAGGATGATCAGCCACACTGGGACTGAGACACGGCCCAGACTCCTACGGGAGGCAGCAGTGGGGAATATTGGACAATGGGGGCAACCCTGATCCAGCCATGCCGCGTGAGTGATGAAGG…
GCF_000518105.1	Bartonella vinsonii subsp. berkhoffii ATCC 51672	T437_RS0106500	Rhizobiaceae	Bartonella	Rhizobiales	TCAATATGAGAGTTTGATCCTGGCTCAGAACGAACGCTGGCGGCAGGCTTAACACATGCAAGTCGAGCGCACTCTTTTAGAGTGAGCGGCAAACGGGTGAGTAACGCGTGGGAATCTACCCCTCTCTACGGAATAACACAGAGAAATTTGTGCTAATACCGTATACGTCCCACAGGGAGACCTTTGGGAGAAAGATTTATCGGAGATGGATGAGCCCGCGTTGGATTAGCTAGTTGGTGAGGTAAAGGCTTACCAAGGCGACGATCCATAGCTGGTCTGAGAGGATGATCAGCCACACTGGGACTGAGACACGGCCCAGACTCCTACGGGAGGCAGCAGTGGGGAATATTGGACAATGGGGGCAACCCTGATCCAGCCATGCCGCGTGAGTGATGAAGG…
GCF_000518105.1	Bartonella vinsonii subsp. berkhoffii ATCC 51672	T437_RS0105925	Rhizobiaceae	Bartonella	Rhizobiales	TCAATATGAGAGTTTGATCCTGGCTCAGAACGAACGCTGGCGGCAGGCTTAACACATGCAAGTCGAGCGCACTCTTTTAGAGTGAGCGGCAAACGGGTGAGTAACGCGTGGGAATCTACCCCTCTCTACGGAATAACACAGAGAAATTTGTGCTAATACCGTATACGTCCCACAGGGAGACCTTTGGGAGAAAGATTTATCGGAGATGGATGAGCCCGCGTTGGATTAGCTAGTTGGTGAGGTAAAGGCTTACCAAGGCGACGATCCATAGCTGGTCTGAGAGGATGATCAGCCACACTGGGACTGAGACACGGCCCAGACTCCTACGGGAGGCAGCAGTGGGGAATATTGGACAATGGGGGCAACCCTGATCCAGCCATGCCGCGTGAGTGATGAAGG…
GCF_000518165.1	Bartonella elizabethae F9251 = ATCC 49927	T429_RS0106505	Rhizobiaceae	Bartonella	Rhizobiales	TCAATATGAGAGTTTGATCCTGGCTCAGAACGAACGCTGGCGGCAGGCTTAACACATGCAAGTCGAGCGCGCTCCTTTTGGAGCGAGCGGCAAACGGGTGAGTAACGCGTGGGAATCTACCCCTCTCTACGGAATAACACAGAGAAATTTGTGCTAATACCGTATACGTCCCTTTGGGAGAAAGATTTATCGGAGATGGATGAGCCCGCGTTGGATTAGCTAGTTGGTGAGGTAACGGCTCACCAAGGCGACGATCCATAGCTGGTCTGAGAGGATGATCAGCCACACTGGGACTGAGACACGGCCCAGACTCCTACGGGAGGCAGCAGTGGGGAATATTGGACAATGGGGGCAACCCTGATCCAGCCATGCCGCGTGAGTGATGAAGGCCCTAGGGTT…
GCF_000518165.1	Bartonella elizabethae F9251 = ATCC 49927	T429_RS0107120	Rhizobiaceae	Bartonella	Rhizobiales	TTCAATATGAGAGTTTGATCCTGGCTCAGAACGAACGCTGGCGGCAGGCTTAACACATGCAAGTCGAGCGCGCTCCTTTTGGAGCGAGCGGCAAACGGGTGAGTAACGCGTGGG
GCF_000518165.1	Bartonella elizabethae F9251 = ATCC 49927	T429_RS0108565	Rhizobiaceae	Bartonella	Rhizobiales	TCAATATGAGAGTTTGATCCTGGCTCAGAACGAACGCTGGCGGCAGGCTTAACACATGCAAGTCGAGCGCGCTCCTTTTGGAGCGAGCGGCAAACGGGTGAGTAACGCGTGGGAATCTACCCCTCTCTACGGAATAACACAGAGAAATTTGTGCTAATACCGTATACGTCCCTTTGGGAGAAAGATTTATCGGAGATGGATGAGCCCGCGTTGGATTAGCTAGTTGGTGAGGTAACGGCTCACCAAGGCGACGATCCATAGCTGGTCTGAGAGGATGATCAGCCACACTGGGACTGAGACACGGCCCAGACTCCTACGGGAGGCAGCAGTGGGGAATATTGGACAATGGGGGCAACCCTGATCCAGCCATGCCGCGTGAGTGATGAAGGCCCTAGGGTT…
GCF_000518165.1	Bartonella elizabethae F9251 = ATCC 49927	T429_RS0107490	Rhizobiaceae	Bartonella	Rhizobiales	TCAATATGAGAGTTTGATCCTGGCTCAGAACGAACGCTGGCGGCAGGCTTAACACATGCAAGTCGAGCGCGCTCCTTTTGGAGCGAGCGGCAAACGGGTGAGTAACGCGTGGGAATCTACCCCTCTCTACGGAATAACACAGAGAAATTTGTGCTAATACCGTATACGTCCCTTTGGGAGAAAGATTTATCGGAGATGGATGAGCCCGCGTTGGATTAGCTAGTTGGTGAGGTAACGGCTCACCAAGGCGACGATCCATAGCTGGTCTGAGAGGATGATCAGCCACACTGGGACTGAGACACGGCCCAGACTCCTACGGGAGGCAGCAGTGGGGAATATTGGACAATGGGGGCAACCCTGATCCAGCCATGCCGCGTGAGTGATGAAGGCCCTAGGGTT…
GCF_000518185.1	Bartonella clarridgeiae ATCC 51734	T420_RS0106290	Rhizobiaceae	Bartonella	Rhizobiales	TCAACTTGAGAGTTTGATCCTGGCTCAGAACGAACGCTGGCGGCAGGCTTAACACATGCAAGTCGAGCGCACTCATTTAGAGTGAGCGGCAGACGGGTGAGTAACGCGTGGGAATCTACCCTTTTCTACGGAATAACACAGAGAAATTTGTGCTAATACCGTATACGTCCTACTGGAGAAAGATTTATCGGAGAAGGATGAGCCCGCGTTGGATTAGCTAGTTGGTGAGGTAAAGGCTCACCAAGGCGACGATCCATAGCTGGTCTGAGAGGATGATCAGCCACACTGGGACTGAGACACGGCCCAGACTCCTACGGGAGGCAGCAGTGGGGAATATTGGACAATGGGGGCAACCCTGATCCAGCCATGCCGCGTGAGTGATGAAGGCCCTAGGGTTGT…
GCF_000518185.1	Bartonella clarridgeiae ATCC 51734	T420_RS0105275	Rhizobiaceae	Bartonella	Rhizobiales	TCAACTTGAGAGTTTGATCCTGGCTCAGAACGAACGCTGGCGGCAGGCTTAACACATGCAAGTCGAGCGCACTCATTTAGAGTGAGCGGCAGACGGGTGAGTAACGCGTGGGAATCTACCCTTTTCTACGGAATAACACAGAGAAATTTGTGCTAATACCGTATACGTCCTACTGGAGAAAGATTTATCGGAGAAGGATGAGCCCGCGTTGGATTAGCTAGTTGGTGAGGTAAAGGCTCACCAAGGCGACGATCCATAGCTGGTCTGAGAGGATGATCAGCCACACTGGGACTGAGACACGGCCCAGACTCCTACGGGAGGCAGCAGTGGGGAATATTGGACAATGGGGGCAACCCTGATCCAGCCATGCCGCGTGAGTGATGAAGGCCCTAGGGTTGT…
GCF_000518585.1	Agrobacterium larrymoorei AF3.10 = ATCC 51759	L886_RS0112010	Rhizobiaceae	NA	Rhizobiales	TCAACTTGAGAGTTTGATCCTGGCTCAGAACGAACGCTGGCGGCAGGCTTAACACATGCAAGTCGAACGCATCGCAAGATGAGTGGCAGACGGGTGAGTAACGCGTGGGAACATACCCTTTTCTACGGAATAGCTCTGGGAAACTGGAATTAATACCGTATACGCCCTACGGGGGAAAGATTTATCGGGGAAGGATTGGCCCGCGTTGGATTAGCTAGTTGGTGGGGTAAAGGCCTACCAAGGCGACGATCCATAGCTGGTCTGAGAGGATGATCAGCCACATTGGGACTGAGACACGGCCCAAACTCCT
GCF_000518585.1	Agrobacterium larrymoorei AF3.10 = ATCC 51759	L886_RS27220	Rhizobiaceae	NA	Rhizobiales	TCAACTTGAGAGTTTGATCCTGGCTCAGAACGAACGCTGGCGGCAGGCTTAACACATGCAAGTCGAACGCATCGCAAGATGAGTGGCAGACGGGTGAGTAACGCGTGGGAACATACCCTTTTCTACGGAATAGCTCTGGGAAACTGGAATTAATACCGTATACGCCCTACGGGGGAAAGATTTATCGGGGAAGGATTGGCCCGCGTTGGATTAGCTAGTTGGTGGGGTAAAGGCCTACCAAGGCGACGATCCATAGCTGGTCTGAGAGGATGATCAGCCACATTGGGACTGAGACACGGCCCAAACTCCTACGGGAGGCAGCAGTGGGGAATATTGGACAATGGGCGCAAGCCTGATCCAGCCATGCCGCGTGAGTGATGAAGGCCTTAGGGTTGTAAA…
GCF_000518665.1	Microvirga flocculans ATCC BAA-817	L879_RS0102925	Beijerinckiaceae	Microvirga	Rhizobiales	TTTCAACTTGAGAGTTTGATCCTGGCTCAGAACGAACGCTGGCGGCAGGCTTAACACATGCAAGTCGAACGCATCCTTCGGGGTGAGTGGCAGACGGGTGAGTAACGCGTGGGAACGTGCCCTTCAGTTCGGGATAACCCAGGGAAACTTGGGCTAATACCGGATA
GCF_000518665.1	Microvirga flocculans ATCC BAA-817	L879_RS0113320	Beijerinckiaceae	NA	Rhizobiales	TTTCAACTTGAGAGTTTGATCCTGGCTCAGAACGAACGCTGGCGGCAGGCTTAACACATGCAAGTCGAACGCATCCTTCGGGGTGAGTGGCAGACGGGTGAGTAACGCGTGGGAACGTGCCCTTCAGTTCGGGATAACCCAGGGAAACTTGGGCTAATACCGGATACGT
GCF_000518665.1	Microvirga flocculans ATCC BAA-817	L879_RS22245	Beijerinckiaceae	Microvirga	Rhizobiales	TTCAACTTGAGAGTTTGATCCTGGCTCAGAACGAACGCTGGCGGCAGGCTTAACACATGCAAGTCGAACGCATCCTTCGGGGTGAGTGGCAGACGGGTGAGTAACGCGTGGGAACGTGCCCTTCAGTTCGGGATAACCCAGGGAAACTTGGGCTAATACCGGATACGTGCGAGAGCAGAAAGATTTATCGCTGAAGGATCGGCCCGCGTCTGATTAGCTGGTTGGTGAGGTAACGGCTCACCAAGGCGACGATCAGTAGCTGGTCTGAGAGGATGATCAGCCACACTGGGACTGAGACACGGCCCAGACTCCTACGGGAGGCAGCAGTGGGGAATATTGGACAATGGGCGCAAGCCTGATCCAGCCATGCCGCGTGAGTGATGACGGCCTTAGGGTTGT…
GCF_000518785.1	Rhizobium selenitireducens ATCC BAA-1503	L867_RS0120845	Rhizobiaceae	NA	Rhizobiales	TCAACTTGAGAGTTTGATCCTGGCTCAGAACGAACGCTGGCGGCAGGCTTAACACATGCAAGTCGAGCGCCCCGCAAGGGGAGCGGCAGACGGGTGAGTAACGCGTGGGAATCTACCGAGCCCTACGGAATAACGCATGGAAACGTGTGCTAATACCGTATACGCCCTACGGGGGAAAGATTTATCGGGGTTTGATGAGCCCGCGTTGGATTAGCTAGTTGGTGGGGTAAAGGCCTACCAAGGCGACGATCCATAGCTGGTCTGAGAGGATGATCAGCCACATTGGGACTGAGACACGGCCCAAACTCCTACGGGAGGCAGCAGTGGGGAATATTGGACAATGGGCGCAAGCCTGATCCAGCCATGCCGCGTGAGTGATGAAGGTCTTAGGATTGTAAA…
GCF_000518785.1	Rhizobium selenitireducens ATCC BAA-1503	L867_RS0117310	NA	NA	NA	TCAACTTGAGAGTTTGATCCTGGCTCAGAACGAACGCTGGCGGCAGGCTTAACACATGCAAGTCGAGCGCCCC
GCF_000526895.1	Bartonella doshiae NCTC 12862 = ATCC 700133	T387_RS0106105	Rhizobiaceae	Bartonella	Rhizobiales	TCAATATGAGAGTTTGATCCTGGCTCAGAACGAACGCTGGCGGCAGGCTTAACACATGCAAGTCGAGCGCACTCTTTTAGAGTGAGCGGCAAACGGGTGAGTAACGCGTGGGAATCTACCCATCTCTACGGAATAACACAGAGAAATTTGTGCTAATACCGTATACGTCCTTAGGGAGAAAGATTTATCGGAGATGGATGAGCCCGCGTTGGATTAGCTAGTTGGTGAGGTAACGGCTCACCAAGGCGACGATCCATAGCTGGTCTGAGAGGATGATCAGCCACACTGGGACTGAGACACGGCCCAGACTCCTACGGGAGGCAGCAGTGGGGAATATTGGACAATGGGGGCAACCCTGATCCAGCCATGCCGCGTGAGTGATGAAGGCCCTAGGGTTGT…
GCF_000526895.1	Bartonella doshiae NCTC 12862 = ATCC 700133	T387_RS0108375	Rhizobiaceae	Bartonella	Rhizobiales	TCAATATGAGAGTTTGATCCTGGCTCAGAACGAACGCTGGCGGCAGGCTTAACACATGCAAGTCGAGCGCACTCTTTTAGAGTGAGCGGCAAACGGGTGAGTAACGCGTGGGAATCTACCCATCTCTACGGAATAACACAGAGAAATTTGTGCTAATACCGTATACGTCCTTAGGGAGAAAGATTTATCGGAGATGGATGAGCCCGCGTTGGATTAGCTAGTTGGTGAGGTAACGGCTCACCAAGGCGACGATCCATAGCTGGTCTGAGAGGATGATCAGCCACACTGGGACTGAGACACGGCCCAGACTCCTACGGGAGGCAGCAGTGGGGAATATTGGACAATGGGGGCAACCCTGATCCAGCCATGCCGCGTGAGTGATGAAGGCCCTAGGGTTGT…
GCF_000577275.2	Rhizobium favelukesii LPU83	LPU83_RS55000	Rhizobiaceae	Allorhizobium-Neorhizobium-Pararhizobium-Rhizobium	Rhizobiales	TCAACATGAGAGTTTGATCCTGGCTCAGAACGAACGCTGGCGGCAGGCTTAACACATGCAAGTCGAGCGCCCCGCAAGGGGAGCGGCAGACGGGTGAGTAACGCGTGGGAACGTACCCTTTACTACGGAATAACGCATGGAAACGTGTGCTAATACCGTATGTGCCCTTTGGGGGAAAGATTTATCGGTAAAGGATCGGCCCGCGTTGGATTAGCTAGTTGGTGGGGTAAAGGCCTACCAAGGCGACGATCCATAGCTGGTCTGAGAGGATGATCAGCCACATTGGGACTGAGACACGGCCCAAACTCCTACGGGAGGCAGCAGTGGGGAATATTGGACAATGGGCGCAAGCCTGATCCAGCCATGCCGCGTGAGTGATGAAGGCCCTAGGGTTGTAAA…
GCF_000577275.2	Rhizobium favelukesii LPU83	LPU83_RS56945	Rhizobiaceae	Allorhizobium-Neorhizobium-Pararhizobium-Rhizobium	Rhizobiales	TCAACATGAGAGTTTGATCCTGGCTCAGAACGAACGCTGGCGGCAGGCTTAACACATGCAAGTCGAGCGCCCCGCAAGGGGAGCGGCAGACGGGTGAGTAACGCGTGGGAACGTACCCTTTACTACGGAATAACGCATGGAAACGTGTGCTAATACCGTATGTGCCCTTTGGGGGAAAGATTTATCGGTAAAGGATCGGCCCGCGTTGGATTAGCTAGTTGGTGGGGTAAAGGCCTACCAAGGCGACGATCCATAGCTGGTCTGAGAGGATGATCAGCCACATTGGGACTGAGACACGGCCCAAACTCCTACGGGAGGCAGCAGTGGGGAATATTGGACAATGGGCGCAAGCCTGATCCAGCCATGCCGCGTGAGTGATGAAGGCCCTAGGGTTGTAAA…
GCF_000577275.2	Rhizobium favelukesii LPU83	LPU83_RS38545	Rhizobiaceae	Allorhizobium-Neorhizobium-Pararhizobium-Rhizobium	Rhizobiales	TCAACATGAGAGTTTGATCCTGGCTCAGAACGAACGCTGGCGGCAGGCTTAACACATGCAAGTCGAGCGCCCCGCAAGGGGAGCGGCAGACGGGTGAGTAACGCGTGGGAACGTACCCTTTACTACGGAATAACGCATGGAAACGTGTGCTAATACCGTATGTGCCCTTTGGGGGAAAGATTTATCGGTAAAGGATCGGCCCGCGTTGGATTAGCTAGTTGGTGGGGTAAAGGCCTACCAAGGCGACGATCCATAGCTGGTCTGAGAGGATGATCAGCCACATTGGGACTGAGACACGGCCCAAACTCCTACGGGAGGCAGCAGTGGGGAATATTGGACAATGGGCGCAAGCCTGATCCAGCCATGCCGCGTGAGTGATGAAGGCCCTAGGGTTGTAAA…
GCF_000615975.1	Nitratireductor aquibiodomus NL21 = JCM 21793	JCM21793_RS22300	Rhizobiaceae	Nitratireductor	Rhizobiales	AACATGAGAGTTTGATCCTGGCTCAGAACGAACGCTGGCGGCAGGCTTAACACATGCAAGTCGAGCGCCCCCTTGTGGGGAGCGGCAGACGGGTGAGTAATGCATGGGAATCTACCCAGCTCTACGGAATAACTCAGGGAAACTTGAACTAATACCGTATGCGCCCTTCGGGGGAAAGATTTATCGGAGTTGGATGAGCCCATGTCTGATTAGCTAGTTGGTGGGGTAAAGGCCTACCAAGGCGACGATCAGTAGCTGGTCTGAGAGGATGATCAGCACACTGGGACTGAGACACGGCCCAGACTCCTACGGGAGGCAGCAGTGGGGAATATTGGACAATGGGCGCAAGCCTGATCCAGCCATGCCGCGTGAGTGATGAAGGCCCTAGGGTTGTAAAGC…
GCF_000621665.1	Rhizobium undicola ORS 992 = ATCC 700741	T424_RS0118665	Rhizobiaceae	NA	Rhizobiales	TCAACTTGAGAGTTTGATCCTGGCTCAGAACGAACGCTGGCGGCAGGCTTAACACATGCAAGTCGAGCGCATCCTTCGGGGTGAGCGGCAGACGGGTGAGTAACGCGTGGGAACGTACCCTTTCCTACGGAATAGCTCCGGGAAACTGGAATTAATACCGTATACGCCCTTAGGGGGAAAGATTTATCGGGGAAGGATCGGCCCGCGTTGGATTAGCTAGTTGGTGGGGTAAAGGCCTACCAAGGCGACGATCCATAGCTGGTCTGAGAGGATGATCAGCCACATTGGGACTGAGACACGGCCCAAACTCCTACGGGAGGCAGCAGTGGGGAATATTGGACAATGGGCGCAAGCCTGATCCAGCCATGCCGCGTGAGTGATGAAGGCCTTAGGGTTGTA…
GCF_000621665.1	Rhizobium undicola ORS 992 = ATCC 700741	T424_RS0110195	NA	NA	NA	TCAACTTGAGAGTTTGATCCTGGCTCAGAACGAACGCTGGCGGCAGGCTTAACACATGCAAGTCG
GCF_000636015.1	Rhodomicrobium udaipurense JA643	T281_RS15895	Rhodomicrobiaceae	Rhodomicrobium	Rhizobiales	AATCTGAGAGTTTGATCCTGGCTCAGAACGAACGCTGGCGGCAGGCTTAACACATGCAAGTCGAACGCACCGCAAGGTGAGTGGCAGACGGGTGAGTAACGCGTGGGAACCTTCCCTTTGGTACGGAATAACTTCGGGAAACCGAAGCTAATACCGTATATCTCCTCCGGGAGAAAGATTTATCGCCAAAGGATGGGCCCGCGTTGGATTAGCTAGTTGGTGTGGTAAAGGCGCACCAAGGCGACGATCCATAGCTGGTCTGAGAGGATGATCAGCCACACTGGGACTGAGACACGGCCCAGACTCCTACGGGAGGCAGCAGTGGGGAATCTTGGACAATGGGGGCAACCCTGATCCAGCCATGCCGCGTGAGTGAAGAAGGCCTTAGGGTTGTAAAGC…
GCF_000662035.2	Brucella ceti B1/94	IL61_RS12775	Rhizobiaceae	Brucella	Rhizobiales	TCAACTTGAGAGTTTGATCCTGGCTCAGAACGAACGCTGGCGGCAGGCTTAACACATGCAAGTCGAGCGCCCCGCAAGGGGAGCGGCAGACGGGTGAGTAACGCGTGGGAACGTACCATTTGCTACGGAATAACTCAGGGAAACTTGTGCTAATACCGTATGTGCCCTTCGGGGGAAAGATTTATCGGCAAATGATCGGCCCGCGTTGGATTAGCTAGTTGGTGGGGTAAAGGCTCACCAAGGCGACGATCCATAGCTGGTCTGAGAGGATGATCAGCACACTGGGACTGAGACACGGCCCAGACTCCTACGGGAGGCAGCAGTGGGGAATATTGGACAATGGGCGCAAGCCTGATCCAGCCATGCCGCGTGAGTGATGAAGGCCCTAGGGTTGTAAAG…
GCF_000662035.2	Brucella ceti B1/94	IL61_RS15380	Rhizobiaceae	NA	Rhizobiales	CTCATGGCCCTTACGGGCTGGGCTACACACGTGCTACAATGGTGGTGACAGTGGGCAGCGAGCACGCGAGTGTGAGCTAATCTCCAAAAGCCATCTCAGTTCGGATTGCACTCTGCAACTCGAGTGCATGAAGTTGGAATCGCTAGTAATCGCGGATCAGCATGCCGCGGTGAATACGTTCCCGGGCCTTGTACACACCGCCCGTCACACCATGGGAGTTGGTTTTACCCGAAGGCGCTGTGCTAACCGCAAGGAGGCAGGCGACCACGGTAGGGTCAGCGACTGGGGTGAAGTCGTAACAAGGTAGCCGTAGGGGAACCTGCGGCTGGATCACCTCCTTTCTAAG
GCF_000688235.1	Terasakiella pusilla DSM 6293	Q397_RS0120035	Terasakiellaceae	Terasakiella	Rhodospirillales	TCAACTTGAGAGTTTGATCCTGGCTCAGAACGAACGCTGGCGGCAGGCCTAACACATGCAAGTCGAGGGAGAAGCTATCTTCGGATAGTGGAGACCGGCAGACGGGTGAGTAACACGTGGGAACATACCGAGTAGTGGGGGATAACAGTTGGAAACGACTGCTAATACCGCATACGCCCTTCGGGGGAAAGATTTATCGCTATTCGATTGGCCCGCGTTAGATTAGCTAGTTGGTAAGGTAACGGCTTACCAAGGCGACGATCTATAGCTGGTTTGAGAGGATGATCAGCCACACTGGGACTGAGACACGGCCCAGACTCCTACGGGAGGCAGCAGTGGGGAATATTGCGCAATGGAGGAAACTCTGACGCAGCCATGCCGCGTGAGTGAAGAAGGCCT…
GCF_000688515.1	Afifella pfennigii DSM 17143	Q331_RS0118895	Rhodobiaceae	Afifella	Rhizobiales	CAACTTGAGAGTTTGATCCTGGCTCAGAACGAACGCTGGCGGCAGGCTTAACACATGCAAGTCGAACGCGCTCTTCGGAGCGAGTGGCAGACGGGTGAGTAACGCGTGGGAATCTACCCAATGGTACGGGATAACCCGAGGAAACTCGAGCTAATACCGTATACGCCCTTCGGGGGAAAGATTTATCGCCATTGGATGAGCCCGCGTCGGATTAGCTTGTTGGTGGGGTAATGGCCTACCAAGGCGACGATCCGTAGCTGGTCTGAGAGGATGATCAGCCACACTGGGACTGAGACACGGCCCAGACTCCTACGGGAGGCAGCAGTGGGGAATCTTGGACAATGGGCGAAAGCCTGATCCAGCCATGCCGCGTGAGTGAAGAAGGCCCTAGGGTTGTAA…
GCF_000696095.1	Agrobacterium rhizogenes NBRC 13257	RRH01S_RS32915	Rhizobiaceae	Allorhizobium-Neorhizobium-Pararhizobium-Rhizobium	Rhizobiales	TCAACATGAGAGTTTGATCCTGGCTCAGAACGAACGCTGGCGGCAGGCTTAACACATGCAAGTCGAGCGCCCCGCAAGGGGAGCGGCAGACGGGTGAGTAACGCGTGGGAATCTACCCTTTTCTACGGAATAACGCAGGGAAACTTGTGCTAATACCGTATGTGTCCTTCGGGAGAAAGATTTATCGGGAAAGGATGAGCCCGCGTTGGATTAGCTAGTTGGTGGGGTAAAGGCCTACCAAGGCGACGATCCATAGCTGGTCTGAGAGGATGATCAGCCACATTGGGACTGAGACACGGCCCAAACTCCTACGGGAGGCAGCAGTGGGGAATATTGGACAATGGGCGCAAGCCTGATCCAGCCATGCCGCGTGAGTGATGAAGGCCCTAGGGTTGTAAA…
GCF_000697965.2	Ensifer adhaerens Casida A	FA04_RS18105	Rhizobiaceae	Ensifer	Rhizobiales	TCAACTTGAGAGTTTGATCCTGGCTCAGAACGAACGCTGGCGGCAGGCTTAACACATGCAAGTCGAGCGCCCCGCAAGGGGAGCGGCAGACGGGTGAGTAACGCGTGGGAATCTACCCTTTTCTACGGAATAACGCAGGGAAACTTGTGCTAATACCGTATACGCCCTTCGGGGGAAAGATTTATCGGGAAAGGATGAGCCCGCGTTGGATTAGCTAGTTGGTGGGGTAAAGGCCTACCAAGGCGACGATCCATAGCTGGTCTGAGAGGATGATCAGCCACATTGGGACTGAGACACGGCCCAAACTCCTACGGGAGGCAGCAGTGGGGAATATTGGACAATGGGCGCAAGCCTGATCCAGCCATGCCGCGTGAGTGATGAAGGCCCTAGGGTTGTAAA…
GCF_000697965.2	Ensifer adhaerens Casida A	FA04_RS25235	Rhizobiaceae	Ensifer	Rhizobiales	TCAACTTGAGAGTTTGATCCTGGCTCAGAACGAACGCTGGCGGCAGGCTTAACACATGCAAGTCGAGCGCCCCGCAAGGGGAGCGGCAGACGGGTGAGTAACGCGTGGGAATCTACCCTTTTCTACGGAATAACGCAGGGAAACTTGTGCTAATACCGTATACGCCCTTCGGGGGAAAGATTTATCGGGAAAGGATGAGCCCGCGTTGGATTAGCTAGTTGGTGGGGTAAAGGCCTACCAAGGCGACGATCCATAGCTGGTCTGAGAGGATGATCAGCCACATTGGGACTGAGACACGGCCCAAACTCCTACGGGAGGCAGCAGTGGGGAATATTGGACAATGGGCGCAAGCCTGATCCAGCCATGCCGCGTGAGTGATGAAGGCCCTAGGGTTGTAAA…
GCF_000697965.2	Ensifer adhaerens Casida A	FA04_RS13570	Rhizobiaceae	Ensifer	Rhizobiales	TCAACTTGAGAGTTTGATCCTGGCTCAGAACGAACGCTGGCGGCAGGCTTAACACATGCAAGTCGAGCGCCCCGCAAGGGGAGCGGCAGACGGGTGAGTAACGCGTGGGAATCTACCCTTTTCTACGGAATAACGCAGGGAAACTTGTGCTAATACCGTATACGCCCTTCGGGGGAAAGATTTATCGGGAAAGGATGAGCCCGCGTTGGATTAGCTAGTTGGTGGGGTAAAGGCCTACCAAGGCGACGATCCATAGCTGGTCTGAGAGGATGATCAGCCACATTGGGACTGAGACACGGCCCAAACTCCTACGGGAGGCAGCAGTGGGGAATATTGGACAATGGGCGCAAGCCTGATCCAGCCATGCCGCGTGAGTGATGAAGGCCCTAGGGTTGTAAA…
GCF_000697965.2	Ensifer adhaerens Casida A	FA04_RS16115	Rhizobiaceae	Ensifer	Rhizobiales	TCAACTTGAGAGTTTGATCCTGGCTCAGAACGAACGCTGGCGGCAGGCTTAACACATGCAAGTCGAGCGCCCCGCAAGGGGAGCGGCAGACGGGTGAGTAACGCGTGGGAATCTACCCTTTTCTACGGAATAACGCAGGGAAACTTGTGCTAATACCGTATACGCCCTTCGGGGGAAAGATTTATCGGGAAAGGATGAGCCCGCGTTGGATTAGCTAGTTGGTGGGGTAAAGGCCTACCAAGGCGACGATCCATAGCTGGTCTGAGAGGATGATCAGCCACATTGGGACTGAGACACGGCCCAAACTCCTACGGGAGGCAGCAGTGGGGAATATTGGACAATGGGCGCAAGCCTGATCCAGCCATGCCGCGTGAGTGATGAAGGCCCTAGGGTTGTAAA…
GCF_000697965.2	Ensifer adhaerens Casida A	FA04_RS33055	Rhizobiaceae	Ensifer	Rhizobiales	TCAACTTGAGAGTTTGATCCTGGCTCAGAACGAACGCTGGCGGCAGGCTTAACACATGCAAGTCGAGCGCCCCGCAAGGGGAGCGGCAGACGGGTGAGTAACGCGTGGGAATCTACCCTTTTCTACGGAATAACGCAGGGAAACTTGTGCTAATACCGTATACGCCCTTCGGGGGAAAGATTTATCGGGAAAGGATGAGCCCGCGTTGGATTAGCTAGTTGGTGGGGTAAAGGCCTACCAAGGCGACGATCCATAGCTGGTCTGAGAGGATGATCAGCCACATTGGGACTGAGACACGGCCCAAACTCCTACGGGAGGCAGCAGTGGGGAATATTGGACAATGGGCGCAAGCCTGATCCAGCCATGCCGCGTGAGTGATGAAGGCCCTAGGGTTGTAAA…
GCF_000705355.1	Rhizobium marinum MGL06	EO99_RS0125160	Rhizobiaceae	Pseudorhizobium	Rhizobiales	CAACTTGAGAGTTTGATCCTGGCTCAGAACGAACGCTGGCGGCAGGCTTAACACATGCAAGTCGAACGCCCCGCAAGGGGAGTGGCAGACGGGTGAGTAACGCGTGGGAATCTACCCAATTCTACGGAACAACAGTTGGAAACGACTGCTAATACCGTATACGCCCTACGGGGGAAAGATTTATCGGAATTGGATGAGCCCGCGTTGGATTAGCTAGTTGGTGGGGTAAAGGCCTACCAAGGCGACGATCCATAGCTGGTCTGAGAGGATGATCAGCCACATTGGGACTGAGACACGGCCCAAACTCCTACGGGAGGCAGCAGTGGGGAATATTGGACAATGGGCGCAAGCCTGATCCAGCCATGCCGCGTGAGTGATGAAGGTCTTAGGATTGTAAAG…
GCF_000706625.1	Bartonella koehlerae C-29	O9A_RS06820	Rhizobiaceae	Bartonella	Rhizobiales	TCAATATGAGAGTTTGATCCTGGCTCAGAACGAACGCTGGCGGCAGGCTTAACACATGCAAGTCGAGCGCACTCTTTTAGAGTGAGCGGCAAACGGGTGAGTAACGCGTGGGAATCTACCCATCTCTACGGAATAACACAGAGAAATTTGTGCTAATACCGTATACGTCCTTAGGGAGAAAGATTTATCGGAGATGGATGAGCCCGCGTTGGATTAGCTAGTTGGTGAGGTAACGGCCCACCAAGGCGACGATCCATAGCTGGTCTGAGAGGATGATCAGCCACACTGGGACTGAGACACGGCCCAGACTCCTACGGGAGGCAGCAGTGGGGAATATTGGACAATGGGGGCAACCCTGATCCAGCCATGCCGCGTGAGTGATGAAGGCCCTAGGGTTGT…
GCF_000706645.1	Bartonella rochalimae ATCC BAA-1498	O99_RS04730	Rhizobiaceae	Bartonella	Rhizobiales	TCAACTTGAGAGTTTGATCCTGGCTCAGAACGAACGCTGGCGGCAGGCTTAACACATGCAAGTCGAGCGCACTCTTATGAGTGAGCGGCAGACGGGTGAGTAACGCGTGGGAATCTACCCTTTTCTACGGAATAACACAGAGAAATTTGTGCTAATACCGTATACGTCCTACTGGAGAAAGATTTATCGGAGAAGGATGAGCCCGCGTTGGATTAGCTAGTTGGTGAGGTAAAGGCTCACCAAGGCGACGATCCATAGCTGGTCTGAGAGGATGATCAGCCACACTGGGACTGAGACACGGCCCAGACTCCTACGGGAGGCAGCAGTGGGGAATATTGGACAATGGGGGCAACCCTGATCCAGCCATGCCGCGTGAGTGATGAAGGCCCTAGGGTTGTA…
GCF_000706645.1	Bartonella rochalimae ATCC BAA-1498	O99_RS06490	Rhizobiaceae	Bartonella	Rhizobiales	TCAACTTGAGAGTTTGATCCTGGCTCAGAACGAACGCTGGCGGCAGGCTTAACACATGCAAGTCGAGCGCACTCTTATGAGTGAGCGGCAGACGGGTGAGTAACGCGTGGGAATCTACCCTTTTCTACGGAATAACACAGAGAAATTTGTGCTAATACCGTATACGTCCTACTGGAGAAAGATTTATCGGAGAAGGATGAGCCCGCGTTGGATTAGCTAGTTGGTGAGGTAAAGGCTCACCAAGGCGACGATCCATAGCTGGTCTGAGAGGATGATCAGCCACACTGGGACTGAGACACGGCCCAGACTCCTACGGGAGGCAGCAGTGGGGAATATTGGACAATGGGGGCAACCCTGATCCAGCCATGCCGCGTGAGTGATGAAGGCCCTAGGGTTGTA…
GCF_000712255.1	Brucella neotomae 5K33	X658_RS07385	Rhizobiaceae	Brucella	Rhizobiales	TCAACTTGAGAGTTTGATCCTGGCTCAGAACGAACGCTGGCGGCAGGCTTAACACATGCAAGTCGAGCGCCCCGCAAGGGGAGCGGCAGACGGGTGAGTAACGCGTGGGAACGTACCATTTGCTACGGAATAACTCAGGGAAACTTGTGCTAATACCGTATGTGCCCTTCGGGGGAAAGATTTATCGGCAAATGATCGGCCCGCGTTGGATTAGCTAGTTGGTGGGGTAAAGGCTCACCAAGGCGACGATCCATAGCTGGTCTGAGAGGATGATCAGCACACTGGGACTGAGACACGGCCCAGACTCCTACGGGAGGCAGCAGTGGGGAATATTGGACAATGGGCGCAAGCCTGATCCAGCCATGCCGCGTGAGTGATGAAGGCCCTAGGGTTGTAAAG…
GCF_000722615.1	Pseudorhizobium pelagicum R1-200B4	GV67_RS23000	Rhizobiaceae	Pseudorhizobium	Rhizobiales	TCAACTTGAGAGTTTGATCCTGGCTCAGAACGAACGCTGGCGGCAGGCTTAACACATGCAAGTCGAACGCCCCGCAAGGGGAGTGGCAGACGGGTGAGTAACGCGTGGGAATCTACCCAATTCTACGGAACAACAGTTGGAAACGACTGCTAATACCGTATACGCCCTACGGGGGAAAGATTTATCGGAATTGGATGAGCCCGCGTTGGATTAGCTAGTTGGTGGGGTAAAGGCCTACCAAGGCGACGATCCATAGCTGGTCTGAGAGGATGATCAGCCACATTGGGACTGAGACACGGCCCAAACTCCTACGGGAGGCAGCAGTGGGGAATATTGGACAATGGGCGCAAGCCTGATCCAGCCATGCCGCGTGAGTGATGAAGGTCTTAGGATTGTAAA…
GCF_000731315.1	Neorhizobium galegae bv. orientalis HAMBI 540	RG540_RS17685	Rhizobiaceae	Neorhizobium	Rhizobiales	CAACTTGAGAGTTTGATCCTGGCTCAGAACGAACGCTGGCGGCAGGCTTAACACATGCAAGTCGAGCGCCTCGCAAGAGGAGCGGCAGACGGGTGAGTAACGCGTGGGAATCTACCCATCCCTACGGAACAACTCCGGGAAACTGGAGCTAATACCGTATACGCCCTTCGGGGGAAAGATTTATCGGGGATGGATGAGCCCGCGTTGGATTAGCTAGTTGGTGGGGTAAAGGCCTACCAAGGCGACGATCCATAGCTGGTCTGAGAGGATGATCAGCCACATTGGGACTGAGACACGGCCCAAACTCCTACGGGAGGCAGCAGTGGGGAATATTGGACAATGGGCGCAAGCCTGATCCAGCCATGCCGCGTGAGTGATGAAGGTCTTAGGATTGTAAAG…
GCF_000731315.1	Neorhizobium galegae bv. orientalis HAMBI 540	RG540_RS19425	Rhizobiaceae	Neorhizobium	Rhizobiales	CAACTTGAGAGTTTGATCCTGGCTCAGAACGAACGCTGGCGGCAGGCTTAACACATGCAAGTCGAGCGCCTCGCAAGAGGAGCGGCAGACGGGTGAGTAACGCGTGGGAATCTACCCATCCCTACGGAACAACTCCGGGAAACTGGAGCTAATACCGTATACGCCCTTCGGGGGAAAGATTTATCGGGGATGGATGAGCCCGCGTTGGATTAGCTAGTTGGTGGGGTAAAGGCCTACCAAGGCGACGATCCATAGCTGGTCTGAGAGGATGATCAGCCACATTGGGACTGAGACACGGCCCAAACTCCTACGGGAGGCAGCAGTGGGGAATATTGGACAATGGGCGCAAGCCTGATCCAGCCATGCCGCGTGAGTGATGAAGGTCTTAGGATTGTAAAG…
GCF_000731315.1	Neorhizobium galegae bv. orientalis HAMBI 540	RG540_RS20300	Rhizobiaceae	Neorhizobium	Rhizobiales	CAACTTGAGAGTTTGATCCTGGCTCAGAACGAACGCTGGCGGCAGGCTTAACACATGCAAGTCGAGCGCCTCGCAAGAGGAGCGGCAGACGGGTGAGTAACGCGTGGGAATCTACCCATCCCTACGGAACAACTCCGGGAAACTGGAGCTAATACCGTATACGCCCTTCGGGGGAAAGATTTATCGGGGATGGATGAGCCCGCGTTGGATTAGCTAGTTGGTGGGGTAAAGGCCTACCAAGGCGACGATCCATAGCTGGTCTGAGAGGATGATCAGCCACATTGGGACTGAGACACGGCCCAAACTCCTACGGGAGGCAGCAGTGGGGAATATTGGACAATGGGCGCAAGCCTGATCCAGCCATGCCGCGTGAGTGATGAAGGTCTTAGGATTGTAAAG…
GCF_000732195.1	Rhizobium vignae CCBAU 05176	GQ59_RS30200	Rhizobiaceae	NA	Rhizobiales	TCAACTTGAGAGTTTGATCCTGGCTCAGAACGAACGCTGGCGGCAGGCTTAACACATGCAAGTCGAGCGCCCCGCAAGGGGAGCGGCAGACGGGTGAGTAACGCGTGGGAATCTACCCATCCCTACGGAACAACTCCGGGAAACTGGAGCTAATACCGTATACGCCCTTCGGGGGAAAGATTTATCGGGGATGGATGAGCCCGCGTTGGATTAGCTAGTTGGTGGGGTAAAGGCCTACCAAGGCGACGATCCATAGCTGGTCTGAGAGGATGATCAGCCACATTGGGACTGAGACACGGCCCAAACTCCTACGGGAGGCAGCAGTGGGGAATATTGGACAATGGGCGAAAGCCTGATCCAGCAATGCCGCGTGAGTGATGAAGGCCTTAGGGTTGTAAA…
GCF_000732195.1	Rhizobium vignae CCBAU 05176	GQ59_RS30420	Prevotellaceae	Prevotella	Bacteroidales	TGGGTTTAAAGGGAGCGTAGGCTGGAGATTAAGTGTGTTGTGAAATGTAGACGCTCAACGTCTGAATTGCAGCGCATACTGGTTTCCTTGAGTACGCACAACGTTGGCGGAATTCGTCGTGTAGCGGTGAAATGCTTAGATATGACGAAGAACTCCGATTGCGAAGGCAGCTGACGGGAGCGCAACTGACGCTGAAGCTCGAAGGTGCGGGTATCGA
GCF_000732195.1	Rhizobium vignae CCBAU 05176	GQ59_RS30195	Rhizobiaceae	Neorhizobium	Rhizobiales	GCCATGCCGCGTGAGTGATGAAGGTCTTAGGATTGTAAAGCTCTTTCACCGGAGAAGATAATGACGGTATCCGGAGAAGAAGCCCCGGCTAACTTCGTGCCAGCAGCCGCGGTAATACGAAGGGGGCTAGCGTTGTTCGGAATTACTGGGCGTAAAGCGCACGTAGGCGGATATTTAAGTCAGGGGTGAAATCCCAGAGCTCAACTCTGGAACTGCCTTTGATACTGGGTATCTTGAGTATGGAAGAGGTAAGTGGAATTGCGAGTGTAGAGGTGAAATTCGTAGATATTCGGAAGAACACCAGTGGCGAAGGCGGCTTACTGGTCCATTACTGACGCTGAGGTGCGAAAGCGTGGGGAGCAAACAGGATTAGATACCCTGGTAGTCCACGCCGTAAAC…
GCF_000739695.1	Tepidicaulis marinus MA2	M2A_RS09390	Parvibaculaceae	Tepidicaulis	Parvibaculales	TCAATTTGAGAGTTTGATCCTGGCTCAGAACGAACGCTGGCGGCAGGCTTAACACATGCAAGTCGAACGCGAACGCACCTTCGGGTGTTAGTAGAGTGGCAGACGGGTGAGTAACGCGTGGGAACCTACCTAGGGGTACGGAATAACGCAGGGAAACTTGTGCTAATACCGTATACGTCCTTCGGGAGAAAGATTTATCGCCCCTAGATGGGCCCGCGTTGGATTAGCTTGTTGGTGAGGTAATGGCTCACCAAGGCTACGATCCATAGCTGGTCTGAGAGGATGATCAGCCACACTGGGACTGAGACACGGCCCAGACT
GCF_000739695.1	Tepidicaulis marinus MA2	M2A_RS16630	Parvibaculaceae	Tepidicaulis	Parvibaculales	CCTACGGGAGGCAGCAGTGGGGAATCTTGCACAATGGGCGAAAGCCTGATGCAGCCATGCCGCGTGAGTGAAGAAGGCCCTAGGGTTGTAAAACTCTTTCAGTGGGGAAGATAATGACGGTACCCACAGAAGAAGCTCCGGCTAACTCCGTGCCAGCAGCCGCGGTAATACGGAGGGAGCTAGCGTTGTTCGGAATTACTGGGCGTAAAGCGCACGTAGGCGGACTGATCAGTTGGGGGTGAAAGCCCAGGGCTCAACCCTGGAACTGCCTTCAATACTGTCAGTCTTGAGTCCGAGAGAGGTGAGTGGAATTTCCAGTGTAGAGGTGAAATTCGTAGATATTGGAAAGAACACCAGTGGCGAAGGCGGCTCACTGGCTCGGTACTGACGCTGAGGTGC…
GCF_000739935.1	Agrobacterium rubi TR3 = NBRC 13261	RRU01S_RS24815	Rhizobiaceae	Allorhizobium-Neorhizobium-Pararhizobium-Rhizobium	Rhizobiales	AGAGTTTGATCCTGGCTCAGAACGAACGCTGGCGGCAGGCTTAACACATGCAAGTCGAACGCTCCGCAAGGAGAGTGGCAGACGGGTGAGTAACGCGTGGGAATCTACCCAACCCTGCGGAATAGCTCTGGGAAACTGGAATTAATACCGCATACGCCTACGGGAAGGAAGTTATCGGGGATGGATGAGCCCGCGTTGGATTAGCTAGTTGGTGGGGTAAAGGCCTACCAAGGCGACGATCCATAGCTGGTCTGAGAGGATGATCAGCCACATTGGGACTGAGACACGGCCCAAACTCCTACGGGAGGCAGCAGTGGGGAATATTGGACAATGGGCGCAAGCCTGATCCAGCCATGCCGCGTGAGTGATGAAGGCCTTAGGGTTGTAAAGCTCTTTCAC…
GCF_000740335.1	Brucella canis RM6/66	DK60_RS08145	Rhizobiaceae	Brucella	Rhizobiales	TCAACTTGAGAGTTTGATCCTGGCTCAGAACGAACGCTGGCGGCAGGCTTAACACATGCAAGTCGAGCGCCCCGCAAGGGGAGCGGCAGACGGGTGAGTAACGCGTGGGAACGTACCATTTGCTACGGAATAACTCAGGGAAACTTGTGCTAATACCGTATGTGCCCTTCGGGGGAAAGATTTATCGGCAAATGATCGGCCCGCGTTGGATTAGCTAGTTGGTGGGGTAAAGGCTCACCAAGGCGACGATCCATAGCTGGTCTGAGAGGATGATCAGCCACACTGGGACTGAGACACGGCCCAGACTCCTACGGGAGGCAGCAGTGGGGAATATTGGACAATGGGCGCAAGCCTGATCCAGCCATGCCGCGTGAGTGATGAAGGCCCTAGGGTTGTAAA…
GCF_000740335.1	Brucella canis RM6/66	DK60_RS13885	Rhizobiaceae	Brucella	Rhizobiales	TCAACTTGAGAGTTTGATCCTGGCTCAGAACGAACGCTGGCGGCAGGCTTAACACATGCAAGTCGAGCGCCCCGCAAGGGGAGCGGCAGACGGGTGAGTAACGCGTGGGAACGTACCATTTGCTACGGAATAACTCAGGGAAACTTGTGCTAATACCGTATGTGCCCTTCGGGGGAAAGATTTATCGGCAAATGATCGGCCCGCGTTGGATTAGCTAGTTGGTGGGGTAAAGGCTCACCAAGGCGACGATCCATAGCTGGTCTGAGAGGATGATCAGCCACACTGGGACTGAGACACGGCCCAGACTCCTACGGGAGGCAGCAGTGGGGAATATTGGACAATGGGCGCAAGCCTGATCCAGCCATGCCGCGTGAGTGATGAAGGCCCTAGGGTTGTAAA…
GCF_000740335.1	Brucella canis RM6/66	DK60_RS09120	Rhizobiaceae	Brucella	Rhizobiales	TCAACTTGAGAGTTTGATCCTGGCTCAGAACGAACGCTGGCGGCAGGCTTAACACATGCAAGTCGAGCGCCCCGCAAGGGGAGCGGCAGACGGGTGAGTAACGCGTGGGAACGTACCATTTGCTACGGAATAACTCAGGGAAACTTGTGCTAATACCGTATGTGCCCTTCGGGGGAAAGATTTATCGGCAAATGATCGGCCCGCGTTGGATTAGCTAGTTGGTGGGGTAAAGGCTCACCAAGGCGACGATCCATAGCTGGTCTGAGAGGATGATCAGCCACACTGGGACTGAGACACGGCCCAGACTCCTACGGGAGGCAGCAGTGGGGAATATTGGACAATGGGCGCAAGCCTGATCCAGCCATGCCGCGTGAGTGATGAAGGCCCTAGGGTTGTAAA…
GCF_000740415.1	Brucella melitensis bv. 1 16M	DK63_RS10720	Rhizobiaceae	Brucella	Rhizobiales	TCAACTTGAGAGTTTGATCCTGGCTCAGAACGAACGCTGGCGGCAGGCTTAACACATGCAAGTCGAGCGCCCCGCAAGGGGAGCGGCAGACGGGTGAGTAACGCGTGGGAACGTACCATTTGCTACGGAATAACTCAGGGAAACTTGTGCTAATACCGTATGTGCCCTTCGGGGGAAAGATTTATCGGCAAATGATCGGCCCGCGTTGGATTAGCTAGTTGGTGGGGTAAAGGCTCACCAAGGCGACGATCCATAGCTGGTCTGAGAGGATGATCAGCCACACTGGGACTGAGACACGGCCCAGACTCCTACGGGAGGCAGCAGTGGGGAATATTGGACAATGGGCGCAAGCCTGATCCAGCCATGCCGCGTGAGTGATGAAGGCCCTAGGGTTGTAAA…
GCF_000740415.1	Brucella melitensis bv. 1 16M	DK63_RS11700	Rhizobiaceae	Brucella	Rhizobiales	TCAACTTGAGAGTTTGATCCTGGCTCAGAACGAACGCTGGCGGCAGGCTTAACACATGCAAGTCGAGCGCCCCGCAAGGGGAGCGGCAGACGGGTGAGTAACGCGTGGGAACGTACCATTTGCTACGGAATAACTCAGGGAAACTTGTGCTAATACCGTATGTGCCCTTCGGGGGAAAGATTTATCGGCAAATGATCGGCCCGCGTTGGATTAGCTAGTTGGTGGGGTAAAGGCTCACCAAGGCGACGATCCATAGCTGGTCTGAGAGGATGATCAGCCACACTGGGACTGAGACACGGCCCAGACTCCTACGGGAGGCAGCAGTGGGGAATATTGGACAATGGGCGCAAGCCTGATCCAGCCATGCCGCGTGAGTGATGAAGGCCCTAGGGTTGTAAA…
GCF_000740415.1	Brucella melitensis bv. 1 16M	DK63_RS04890	Rhizobiaceae	Brucella	Rhizobiales	TCAACTTGAGAGTTTGATCCTGGCTCAGAACGAACGCTGGCGGCAGGCTTAACACATGCAAGTCGAGCGCCCCGCAAGGGGAGCGGCAGACGGGTGAGTAACGCGTGGGAACGTACCATTTGCTACGGAATAACTCAGGGAAACTTGTGCTAATACCGTATGTGCCCTTCGGGGGAAAGATTTATCGGCAAATGATCGGCCCGCGTTGGATTAGCTAGTTGGTGGGGTAAAGGCTCACCAAGGCGACGATCCATAGCTGGTCTGAGAGGATGATCAGCCACACTGGGACTGAGACACGGCCCAGACTCCTACGGGAGGCAGCAGTGGGGAATATTGGACAATGGGCGCAAGCCTGATCCAGCCATGCCGCGTGAGTGATGAAGGCCCTAGGGTTGTAAA…
GCF_000742005.1	Brucella suis 1330	DK66_RS13855	Rhizobiaceae	Brucella	Rhizobiales	TCAACTTGAGAGTTTGATCCTGGCTCAGAACGAACGCTGGCGGCAGGCTTAACACATGCAAGTCGAGCGCCCCGCAAGGGGAGCGGCAGACGGGTGAGTAACGCGTGGGAACGTACCATTTGCTACGGAATAACTCAGGGAAACTTGTGCTAATACCGTATGTGCCCTTCGGGGGAAAGATTTATCGGCAAATGATCGGCCCGCGTTGGATTAGCTAGTTGGTGGGGTAAAGGCTCACCAAGGCGACGATCCATAGCTGGTCTGAGAGGATGATCAGCCACACTGGGACTGAGACACGGCCCAGACTCCTACGGGAGGCAGCAGTGGGGAATATTGGACAATGGGCGCAAGCCTGATCCAGCCATGCCGCGTGAGTGATGAAGGCCCTAGGGTTGTAAA…
GCF_000742255.1	Brucella neotomae 5K33	DK64_RS00030	Rhizobiaceae	Brucella	Rhizobiales	TCAACTTGAGAGTTTGATCCTGGCTCAGAACGAACGCTGGCGGCAGGCTTAACACATGCAAGTCGAGCGCCCCGCAAGGGGAGCGGCAGACGGGTGAGTAACGCGTGGGAACGTACCATTTGCTACGGAATAACTCAGGGAAACTTGTGCTAATACCGTATGTGCCCTTCGGGGGAAAGATTTATCGGCAAATGATCGGCCCGCGTTGGATTAGCTAGTTGGTGGGGTAAAGGCTCACCAAGGCGACGATCCATAGCTGGTCTGAGAGGATGATCAGCCACACTGGGACTGAGACACGGCCCAGACTCCTACGGGAGGCAGCAGTGGGGAATATTGGACAATGGGCGCAAGCCTGATCCAGCCATGCCGCGTGAGTGATGAAGGCCCTAGGGTTGTAAA…
GCF_000742255.1	Brucella neotomae 5K33	DK64_RS05110	Rhizobiaceae	Brucella	Rhizobiales	TCAACTTGAGAGTTTGATCCTGGCTCAGAACGAACGCTGGCGGCAGGCTTAACACATGCAAGTCGAGCGCCCCGCAAGGGGAGCGGCAGACGGGTGAGTAACGCGTGGGAACGTACCATTTGCTACGGAATAACTCAGGGAAACTTGTGCTAATACCGTATGTGCCCTTCGGGGAAAGATTTATCGGCAAATGATCGGCCCGCGTTGGATTAGCTAGTTGGTGGGGTAAAGGCTCACCAAGGCGACGATCCATAGCTGGTCTGAGAGGATGATCAGCCACACTGGGACTGAGACACGGCCCAGACTCCTACGGGAGGCAGCAGTGGGGAATATTGGACAATGGGCGCAAGCCTGATCCAGCCATGCCGCGTGAGTGATGAAGGCCCTAGGGTTGTAAAG…
GCF_000742255.1	Brucella neotomae 5K33	DK64_RS13675	Rhizobiaceae	Brucella	Rhizobiales	TCAACTTGAGAGTTTGATCCTGGCTCAGAACGAACGCTGGCGGCAGGCTTAACACATGCAAGTCGAGCGCCCCGCAAGGGGAGCGGCAGACGGGTGAGTAACGCGTGGGAACGTACCATTTGCTACGGAATAACTCAGGGAAACTTGTGCTAATACCGTATGTGCCCTTCGGGGGAAAGATTTATCGGCAAATGATCGGCCCGCGTTGGATTAGCTAGTTGGTGGGGTAAAGGCTCACCAAGGCGACGATCCATAGCTGGTCTGAGAGGATGATCAGCCACACTGGGACTGAGACACGGCCCAGACTCCTACGGGAGGCAGCAGTGGGGAATATTGGACAATGGGCGCAAGCCTGATCCAGCCATGCCGCGTGAGTGATGAAGGCCCTAGGGTTGTAAA…
GCF_000743575.1	Devosia riboflavina IFO13584	JP75_RS24370	Devosiaceae	Devosia	Rhizobiales	AACTTGAGAGTTTGATCCTGGCTCAGAACGAACGCTGGCGGCAGGCTTAACACATGCAAGTCGAACGCCCCGCAAGGGGAGTGGCAGACGGGTGAGTAACGCGTGGGAATCTACCTAGTTCTACGGAACAACAGTTGGAAACGACTGCTAATACCGTATACGCCCTACGGGGGAAAGATTTATCGGAATTAGATGAGCCCGCGTAAGATTAGCTAGTTGGTGGGGTAATGGCCTACCAAGGCGACGATCTTTAGCTGGTCTGAGAGGATGATCAGCCACACTGGGACTGAGACACGGCCCAGACTCCTACGGGAGGCAGCAGTGGGGAATATTGGACAATGGGCGCAAGCCTGATCCAGCCATGCCGCGTGAGTGATGAAGGCCTTAGGGTTGTAAAGC…
GCF_000745425.1	Beijerinckia mobilis UQM 1969	DL88_RS18210	Beijerinckiaceae	Beijerinckia	Rhizobiales	CAACTTGAGAGTTTGATCCTGGCTCAGAACGAACGCTGGCGGCAGGCCTAACACATGCAAGTCGAACGCCGTAGCAATACGGAGTGGCAGACGGGTGAGTAACGCGTGGGAACGTACCCTTTGGTTCGGAATAACTCAGGGAAACTTGGGCTAATACCGGATACGTCCGAGAGGAGAAAGATTTATCGCCGAAGGATCGGCCCGCGTCTGATTAGCTAGTTGGTGTGGTAATGGCGCACCAAGGCGACGATCAGTAGCTGGTCTGAGAGGATGATCAGCCACATTGGGACTGAGACACGGCCCAAACTCCTACGGGAGGCAGCAGTGGGGAATATTGGACAATGGGCGCAAGCCTGATCCAGCCATGCCGCGTGAGTGATGACGGCCTTAGGGTTGTAA…
GCF_000746085.1	Methylocapsa aurea UQM 1969	DL86_RS07155	Beijerinckiaceae	Methylocapsa	Rhizobiales	CAACTTGAGAGTTTGATCCTGGCTCAGAACGAACGCTGGCGGCAGGCCTAACACATGCAAGTCGAACGCCGTAGCAATACGGAGTGGCAGACGGGTGAGTAACACGTGGGAACATACCCTTCGGTTCGGAATAACTCAGGGAAACTTGTGCTAATACCGGATACGTCCGCAAGGAGAAAGATTTATCGCCGAAGGATTGGCCCGCGTCTGATTAGCTTGTTGGTGAGGTAATGGCTCACCAAGGCGACGATCAGTAGCTGGTCTGAGAGGATGATCAGCCACATTGGGACTGAGACACGGCCCAAACTCCTACGGGAGGCAGCAGTGGGGAATATTGGACAATGGGCGAAAGCCTGATCCAGCCATGCCGCGTGAGTGATGAAGGCCTTAGGGTTGTAA…
GCF_000757795.1	Methylobacterium oryzae CBMB20	MOC_RS08455	Beijerinckiaceae	Methylobacterium-Methylorubrum	Rhizobiales	GTGATCGGCCAGATCAATCTCTTCAACGTGAGAGTTTGATCCTGGCTCAGAGCGAACGCTGGCGGCAGGCTTAACACATGCAAGTCGAGCGGACCTTTCGGGGTCAGCGGCGGACGGGTGAGTAACGCGTGGGAACGTGCCTTCCGGTTCGGAATAACCCTGGGAAACTAGGGCTAATACCGGATACGCCCTTATGGGGAAAGGTTTACTGCCGGAAGATCGGCCCGCGTCTGATTAGCTAGTTGGTGGGGTAACGGCCTACCAAGGCGACGATCAGTAGCTGGTCTGAGAGGATGATCAGCCACACTGGGACTGAGACACGGCCCAGACTCCTACGGGAGGCAGCAGTGGGGAATATTGGACAATGGGCGCAAGCCTGATCCAGCCATGCCGCGTGAG…
GCF_000757795.1	Methylobacterium oryzae CBMB20	MOC_RS12710	Beijerinckiaceae	Methylobacterium-Methylorubrum	Rhizobiales	GTGATCGGCCAGATCAATCTCTTCAACGTGAGAGTTTGATCCTGGCTCAGAGCGAACGCTGGCGGCAGGCTTAACACATGCAAGTCGAGCGGACCTTTCGGGGTCAGCGGCGGACGGGTGAGTAACGCGTGGGAACGTGCCTTCCGGTTCGGAATAACCCTGGGAAACTAGGGCTAATACCGGATACGCCCTTATGGGGAAAGGTTTACTGCCGGAAGATCGGCCCGCGTCTGATTAGCTAGTTGGTGGGGTAACGGCCTACCAAGGCGACGATCAGTAGCTGGTCTGAGAGGATGATCAGCCACACTGGGACTGAGACACGGCCCAGACTCCTACGGGAGGCAGCAGTGGGGAATATTGGACAATGGGCGCAAGCCTGATCCAGCCATGCCGCGTGAG…
GCF_000757795.1	Methylobacterium oryzae CBMB20	MOC_RS17975	Beijerinckiaceae	Methylobacterium-Methylorubrum	Rhizobiales	GTGATCGGCCAGATCAATCTCTTCAACGTGAGAGTTTGATCCTGGCTCAGAGCGAACGCTGGCGGCAGGCTTAACACATGCAAGTCGAGCGGACCTTTCGGGGTCAGCGGCGGACGGGTGAGTAACGCGTGGGAACGTGCCTTCCCGGTTCGGAATAACCCTGGGAAACTAGGGCTAATACCGGATACGCCCTTATGGGGAAAGGTTTACTGCCGGAAGATCGGCCCGCGTCTGATTAGCTAGTTGGTGGGGTAACGGCCTACCAAGGCGACGATCAGTAGCTGGTCTGAGAGGATGATCAGCCACACTGGGACTGAGACACGGCCCAGACTCCTACGGGAGGCAGCAGTGGGGGAATATTGGACAATGGGCGCAAGCCTGATCCAGCCATGCCGCGTG…
GCF_000757795.1	Methylobacterium oryzae CBMB20	MOC_RS22910	Beijerinckiaceae	Methylobacterium-Methylorubrum	Rhizobiales	GTGATCGGCCAGATCAATCTCTTCAACGTGAGAGTTTGATCCTGGCTCAGAGCGAACGCTGGCGGCAGGCTTAACACATGCAAGTCGAGCGGACCTTTCGGGGTCAGCGGCGGACGGGTGAGTAACGCGTGGGAACGTGCCTTCCGGTTCGGAATAACCCTGGGAAACTAGGGCTAATACCGGATACGCCCTTATGGGGAAAGGTTTACTGCCGGAAGATCGGCCCGCGTCTGATTAGCTAGTTGGTGGGGTAACGGCCTACCAAGGCGACGATCAGTAGCTGGTCTGAGAGGATGATCAGCCACACTGGGACTGAGACACGGCCCAGACTCCTACGGGAGGCAGCAGTGGGGAATATTGGACAATGGGCGCAAGCCTGATCCAGCCATGCCGCGTGAG…
GCF_000828475.1	Methyloceanibacter caenitepidi Gela4	GL4_RS15815	Methyloligellaceae	Methyloceanibacter	Rhizobiales	TCAATCTAAGAGTTTGATCCTGGCTCAGAACGAACGCTGGCGGCAGGCCTAACACATGCAAGTCGAACGAGAAGCTACCTTCGGGTAGTGGAAAGTGGCAGACGGGTGAGTAACGCGTGGGAACGTGCCTTTCGGTTCGGAATAACTCAGGGAAACTTGGGCTAATACCGGATACGCCCTTCGGGGGAAAGATTTATCGCCGAAAGATCGGCCCGCGTCAGATTAGCTAGTTGGTGGGGTAATGGCTCACCAAGGCGACGATCTGTAGCTGGTCTGAGAGGATGATCAGCCACACTGGGACTGAGACACGGCCCAGACTCCTACGGGAGGCAGCAGTGGGGAATATTGGACAATGGGCGAAAGCCTGATCCAGCCATGCCGCGTGGGTGAAGAAGGCCC…
GCF_000949865.1	Rhizobium nepotum 39/7	RS75_RS24985	Rhizobiaceae	Allorhizobium-Neorhizobium-Pararhizobium-Rhizobium	Rhizobiales	TCAACTTGAGAGTTTGATCCTGGCTCAGAACGAACGCTGGCGGCAGGCTTAACACATGCAAGTCGAACGCCCCGCAAGGGGAGTGGCAGACGGGTGAGTAACGCGTGGGAATCTACCGTGCCCTGCGGAATAGCTCTGGGAAACTGGAATTAATACCGCATACGCCCTACGGGGGAAAGATTTATCGGGGTATGATGAGCCCGCGTTGGATTAGCTAGTTGGTGGGGTAATGGCCTACCAAGGCGACGATCCATAGCTGGTCTGAGAGGATGATCAGCCACATTGGGACTGAGACACGGCCCAAACTCCTACGGGAGGCAGCAGTGGGGAATATTGGACAATGGGCGCAAGCCTGATCCAGCCATGCCGCGTGAGTGATGAAGGCCTTAGGGTTGTAAA…
GCF_000960975.1	Martelella endophytica YC6887	TM49_RS22460	Rhizobiaceae	Martelella	Rhizobiales	CAACTTGAGAGTTTGATCCTGGCTCAGGACGAACGCTGGCGGCAGGCTTAACACATGCAAGTCGAACGATCCTTCGGGATAGTGGCAGACGGGTGAGTAACGCGTGGGAATCTACCTTTTGGTACGGAATAGCTCCGGGAAACTGGAATTAATACCGTATGTGTCCTTCGGGAGAAAGATTTATCGCCAAGAGATGAGCCCGCGTTTGATTAGGTAGTTGGTGGGGTAATGGCCTACCAAGCCGACGATCAATAGCTGGTCTGAGAGGATGATCAGCCACATTGGGACTGAGACACGGCCCAAACTCCTACGGGAGGCAGCAGTGGGGAATATTGGACAATGGGCGCAAGCCTGATCCAGCCATGCCGCGTGAGTGATGAAGGCCCTAGGGTTGTAAAG…
GCF_000960975.1	Martelella endophytica YC6887	TM49_RS02980	Rhizobiaceae	Martelella	Rhizobiales	CAACTTGAGAGTTTGATCCTGGCTCAGGACGAACGCTGGCGGCAGGCTTAACACATGCAAGTCGAACGATCCTTCGGGATAGTGGCAGACGGGTGAGTAACGCGTGGGAATCTACCTTTTGGTACGGAATAGCTCCGGGAAACTGGAATTAATACCGTATGTGTCCTTCGGGAGAAAGATTTATCGCCAAGAGATGAGCCCGCGTTTGATTAGGTAGTTGGTGGGGTAATGGCCTACCAAGCCGACGATCAATAGCTGGTCTGAGAGGATGATCAGCCACATTGGGACTGAGACACGGCCCAAACTCCTACGGGAGGCAGCAGTGGGGAATATTGGACAATGGGCGCAAGCCTGATCCAGCCATGCCGCGTGAGTGATGAAGGCCCTAGGGTTGTAAAG…
GCF_000960975.1	Martelella endophytica YC6887	TM49_RS04700	Rhizobiaceae	Martelella	Rhizobiales	CAACTTGAGAGTTTGATCCTGGCTCAGGACGAACGCTGGCGGCAGGCTTAACACATGCAAGTCGAACGATCCTTCGGGATAGTGGCAGACGGGTGAGTAACGCGTGGGAATCTACCTTTTGGTACGGAATAGCTCCGGGAAACTGGAATTAATACCGTATGTGTCCTTCGGGAGAAAGATTTATCGCCAAGAGATGAGCCCGCGTTTGATTAGGTAGTTGGTGGGGTAATGGCCTACCAAGCCGACGATCAATAGCTGGTCTGAGAGGATGATCAGCCACATTGGGACTGAGACACGGCCCAAACTCCTACGGGAGGCAGCAGTGGGGAATATTGGACAATGGGCGCAAGCCTGATCCAGCCATGCCGCGTGAGTGATGAAGGCCCTAGGGTTGTAAAG…
GCF_000969415.1	Devosia geojensis BD-c194	VE25_RS07900	Devosiaceae	NA	Rhizobiales	AACTTGAGAGTTTGATCCTGGCTCAGAACGAACGCTGGCGGCAGGCTTAACACATGCAAGTCGAACGCACTCTTCGGAGTGAGTGGCAGACGGGTGAGTAACGCGTGGGAACCTACCCTTTACTACGGAATAACTGAGGGAAACTTCAGCTAATACCGTATACGCCCTACGGGGGAAAGATTTATCGGTAAAGGATGGGCCCGCGTTGGATTAGCTAGTTGGTGGGGTAATGGCCTACCAAGGCGACGATCCATAGCTGGTCTGAGAGGATGATCAGCCACACTGGGACTGAGACACGGCCCAGACTCCTACGGGAGGCAGCAGTGGGGAATATTGGACAATGGGGGAAACCCTGATCCAGCCATGCCGCGTGAGTGATGAAGGCCTTAGGGTTGTAAA…
GCF_000969445.1	Devosia chinhatensis IPL18	VE26_RS00190	Lactobacillaceae	Lactobacillus	Lactobacillales	CCTACGGGAGGCAGCAGTGGGGAATCTTCCACAATGGGCGAAAGCCTGATGGAGCAACGCCGCGTGGGTGAAGAAGGTCTTCGGATCGTAAAACCCTGTTGTTAGAGAAGAAAGTGCGTGAGAGTAACTGTTCACGTTTCGACGGTATCTAACCAGAAAGCCACGGCTAACTACGTGCCAGCAGCCGCGGTAATACGTAGGTGGCAAGCGTTATCCGGATTTATTGGGCGTAAAGGGAACGCAGGCGGTCTTTTAAGTCTGATGTGAAAGCCTTCGGCTTAACCGGAGTAGTGCATTGGAAACTGGGAGACTTGAGTGCAGAAGAGGAGAGTGGAACTCCATGTGTAGCGGTGAAATGCGTAGATATATGGAAGAACACCAGTGGCGAAAGCGGCTCTC…
GCF_000969445.1	Devosia chinhatensis IPL18	VE26_RS12645	Devosiaceae	Devosia	Rhizobiales	AACTTGAGAGTTTGATCCTGGCTCAGAACGAACGCTGGCGGCAGGCTTAACACATGCAAGTCGAACGCCCCGCAAGGGGAGTGGCAGACGGGTGAGTAACGCGTGGGAATCTACCTAGTTCTACGGAACAACAGTTGGAAACGACTGCTAATACCGTATACGCCCTATGGGGGAAAGATTTATCGGAATTAGATGAGCCCGCGTAAGATTAGCTAGTTGGTGAGGTAATGGCTCACCAAGGCGACGATCTTTAGCTGGTCTGAGAGGATGATCAGCCACACTGGGACTGAGACACGGCCCAGACTCCTACGGGAGGCAGCAGTGGGGAATATTGGACAATGGGCGCAAGCCTGATCCAGCCATGCCGCGTGAGTGATGAAGGCCTTAGGGTTGTAAAGC…
GCF_000969445.1	Devosia chinhatensis IPL18	VE26_RS13200	Devosiaceae	Devosia	Rhizobiales	AACTTGAGAGTTTGATCCTGGCTCAGAACGAACGCTGGCGGCAGGCTTAACACATGCAAGTCGAACGCCCCGCAAGGGGAGTGGCAGACGGGTGAGTAACGCGTGGGAATCTACCTAGTTCTACGGAACAACAGTTGGAAACGACTGCTAATACCGTATACGCCCTATGGGGGAAAGATTTATCGGAATTAGATGAGCCCGCGTAAGATTAGCTAGTTGGTGAGGTAATGGCTCACCAAGGCGACGATCTTTAGCTGGTCTGAGAGGATGATCAGCCACACTGGGACTGAGACACGGCCCAGACTCCTACGGGAGGCAGCAGTGGGGAATATTGGACAATGGGCGCAAGCCTGATCCAGCCATGCCGCGTGAGTGATGAAGGCCTTAGGGTTGTAAAGC…
GCF_000970435.1	Devosia limi DSM 17137	VW29_RS21325	Devosiaceae	Devosia	Rhizobiales	AACTTGAGAGTTTGATCCTGGCTCAGAACGAACGCTGGCGGCAGGCTTAACACATGCAAGTCGAACGGTCTCTTCGGAGGCAGTGGCAGACGGGTGAGTAACGCGTGGGAATCTACCTAGTTCTGCGGAACAACAGTTGGAAACGACTGCTAATACCGCATACGCCCTACGGGGGAAAGATTTATCGGAATTAGATGAGCCCGCGTAAGATTAGCTAGTTGGTGGGGTAATGGCCTACCAAGGCGACGATCTTTAGCTGGTCTGAGAGGATGATCAGCCACACTGGGACTGAGACACGGCCCAGACTCCTACGGGAGGCAGCAGTGGGGAATATTGGACAATGGGCGCAAGCCTGATCCAGCCATGCCGCGTGAGTGATGAAGGCCTTAGGGTTGTAAA…
GCF_000970455.1	Devosia soli GH2-10	VW35_RS04035	Devosiaceae	Devosia	Rhizobiales	AACTTGAGAGTTTGATCCTGGCTCAGAACGAACGCTGGCGGCAGGCTTAACACATGCAAGTCGAACGCATCGCAAGATGAGTGGCAGACGGGTGAGTAACGCGTGGGAATCTACCTAGTTCTACGGAACAACAGTTGGAAACGACTGCTAATACCGTATACGCCCTACGGGGGAAAGATTTATCGGAATTAGATGAGCCCGCGTAAGATTAGCTAGTTGGTGGGGTAATGGCCTACCAAGGCGACGATCTTTAGCTGGTCTGAGAGGATGATCAGCCACACTGGGACTGAGACACGGCCCAGACTCCTACGGGAGGCAGCAGTGGGGAATATTGGACAATGGGCGCAAGCCTGATCCAGCCATGCCGCGTGAGTGATGAAGGCCTTAGGGTTGTAAAGC…
GCF_000970465.2	Devosia insulae DS-56	VW23_RS14370	Devosiaceae	Devosia	Rhizobiales	AACTTGAGAGTTTGATCCTGGCTCAGAACGAACGCTGGCGGCAGGCTTAACACATGCAAGTCGAACGCCCCGCAAGGGGAGTGGCAGACGGGTGAGTAACGCGTGGGAATCTACCTAGTTCTACGGAACAACACAGGGAAACTTGTGCTAATACCGTATACGCCCTACGGGGGAAAGATTTATCGGAATTAGATGAGCCCGCGTAAGATTAGCTAGTTGGTGGGGTAATGGCCTACCAAGGCGACGATCTTTAGCTGGTCTGAGAGGATGATCAGCCACACTGGGACTGAGACACGGCCCAGACTCCTACGGGAGGCAGCAGTGGGGAATATTGGACAATGGGCGCAAGCCTGATCCAGCCATGCCGCGTGAGTGATGAAGGCCTTAGGGTTGTAAAGC…
GCF_000971275.1	Devosia psychrophila Cr7-05	WH91_RS05590	Devosiaceae	Devosia	Rhizobiales	AACTTGAGAGTTTGATCCTGGCTCAGAACGAACGCTGGCGGCAGGCTTAACACATGCAAGTCGAACGCTCCGCAAGGAGAGTGGCAGACGGGTGAGTAACGCGTGGGAATCTACCTAGTTCTACGGAACAACAGTTGGAAACGACTGCTAATACCGTATACGCCCTACGGGGGAAAGATTTATCGGAATTAGATGAGCCCGCGTAAGATTAGCTAGTTGGTGGGGTAATGGCCTACCAAGGCGACGATCTTTAGCTGGTCTGAGAGGATGATCAGCCACACTGGGACTGAGACACGGCCCAGACTCCTACGGGAGGCAGCAGTGGGGAATATTGGACAATGGGCGCAAGCCTGATCCAGCCATGCCGCGTGAGTGATGAAGGCCTTAGGGTTGTAAAGC…
GCF_000971295.1	Devosia epidermidihirudinis E84	WH87_RS02875	Devosiaceae	Devosia	Rhizobiales	AACTTGAGAGTTTGATCCTGGCTCAGAACGAACGCTGGCGGCAGGCTTAACACATGCAAGTCGAACGGTCTCTTCGGAGGCAGTGGCAGACGGGTGAGTAACGCGTGGGAATCTACCTAGTTCTGCGGAACAACAGTTGGAAACGACTGCTAATACCGCATACGCCCTACGGGGGAAAGATTTATCGGAATTAGATGAGCCCGCGTAAGATTAGCTAGTTGGTGGGGTAATGGCCTACCAAGGCGACGATCTTTAGCTGGTCTGAGAGGATGATCAGCCACACTGGGACTGAGACACGGCCCAGACTCCTACGGGAGGCAGCAGTGGGGAATATTGGACAATGGGCGCAAGCCTGATCCAGCCATGCCGCGTGAGTGATGAAGGCCTTAGGGTTGTAAA…
GCF_000971295.1	Devosia epidermidihirudinis E84	WH87_RS02915	Devosiaceae	Devosia	Rhizobiales	AACTTGAGAGTTTGATCCTGGCTCAGAACGAACGCTGGCGGCAGGCTTAACACATGCAAGTCGAACGGTCTCTTCGGAGGCAGTGGCAGACGGGTGAGTAACGCGTGGGAATCTACCTAGTTCTGCGGAACAACAGTTGGAAACGACTGCTAATACCGCATACGCCCTACGGGGGAAAGATTTATCGGAATTAGATGAGCCCGCGTAAGATTAGCTAGTTGGTGGGGTAATGGCCTACCAAGGCGACGATCTTTAGCTGGTCTGAGAGGATGATCAGCCACACTGGGACTGAGACACGGCCCAGACTCCTACGGGAGGCAGCAGTGGGGAATATTGGACAATGGGCGCAAGCCTGATCCAGCCATGCCGCGTGAGTGATGAAGGCCTTAGGGTTGTAAA…
GCF_001006805.1	Microvirga massiliensis JC119	BN1233_RS42360	Beijerinckiaceae	Microvirga	Rhizobiales	TCTAAGTTGAGAGTTTGATCCTGGCTCAGAGCGAACGCTGGCGGCAGGCTTAACACATGCAAGTCGAACGCATCCTTCGGGATGAGTGGCAGACGGGTGAGTAACACGTGGGAACGTGCCTTCTGGTTCGGAATAACCCAGGGAAACTTGGGCTAATACCGGATACGCCCTTACGGGGAAAGATTTATCGCCGGAAGATCGGCCCGCGTCTGATTAGCTTGTTGGTGGGGTAATGGCCCACCAAGGCGACGATCAGTAGCTGGTCTGAGAGGATGATCAGCCACACTGGGACTGAGACACGGCCCAGACTCCTACGGGAGGCAGCAGTGGGGAATATTGGACAATGGGCGCAAGCCTGATCCAGCCATGCCGCGTGAGTGATGAAGGCCCTAGGGTTGT…
GCF_001017175.1	Microvirga vignae BR3299	AA309_RS25415	Beijerinckiaceae	Microvirga	Rhizobiales	AACTTGAGAGTTTGATCCTGGCTCAGAACGAACGCTGGCGGCAGGCTTAACACATGCAAGTCGAACGGGCCCTTCGGGGTCAGTGGCAGACGGGTGAGTAACGCGTGGGAACGTGCCCTTCAGTTCGGAATAACCCAGGGAAACTTGGGCTAATACCGGATACGTCCGTAAGGAGAAAGATTTATCGCTGAAGGATCGGCCCGCGTCTGATTAGCTGGTTGGTAGGGTAATGGCCTACCAAGGCGACGATCAGTAGCTGGTCTGAGAGGATGATCAGCCACATTGGGACTGAGACACGGCCCAAACTCCTACGGGAGGCAGCAGTGGGGAATATTGGACAATGGGCGCAAGCCTGATCCAGCCATGCCGCGTGAGTGATGACGGCCTTAGGGTTGTAAA…
GCF_001043885.1	Methylobacterium platani JCM 14648	SQ03_RS21900	Beijerinckiaceae	Methylobacterium-Methylorubrum	Rhizobiales	TTGTGATCAGCTTTGATCAGCTCTTCAACTTGAGAGTTTGATCCTGGCTCAGAGCGAACGCTGGCGGCAGGCTTAACACATGCAAGTCGAGCGGGCATCCTCGTGGTGTCAGCGGCAGACGGGTGAGTAACACGTGGGAACGTGCCCTTCGGTTCGGAATAACTCAGGGAAACTTGAGCTAATACCGGATACGCCCTTTTGGGGAAAGGTTTATCTGCCGAAGGATCGGCCCGCGTCTGATTAGCTAGTTGGTGAGGTTATGGCTCACCAAGGCGACGATCAGTAGCTGGTCTGAGAGGATGATCAGCCACACTGGGACTGAGACACGGCCCAGACTCCTACGGGAGGCAGCAGTGGGGAATATTGGACAATGGGGGCAACCCTGATCCAGCCATGCCG…
GCF_001043895.1	Methylobacterium indicum SE2.11	QR78_RS25045	Beijerinckiaceae	Methylobacterium-Methylorubrum	Rhizobiales	AGCCTCCGTTACTATTGTGATCAGCTATGATCAGCTCTTCAACTTGAGAGTTTGATCCTGGCTCAGAGCGAACGCTGGCGGCAGGCTTAACACATGCAAGTCGAGCGGGCATCCTTGTGGTGTCAGCGGCAGACGGGTGAGTAACGCGTGGGAACGTGCCCTTCGGTTCGGAATAACTCAGGGAAACTTGAGCTAATACCGGATACGTGCGAGAGCAGAAAGGTTTACTGCCGAAGGATCGGCCCGCGTCTGATTAGCTAGTTGGTGAGGTTACGGCTCACCAAGGCGACGATCAGTAGCTGGTCTGAGAGGATGATCAGCCACACTGGGACTGAGACACGGCCCAGACTCCTACGGGAGGCAGCAGTGGGGAATATTGGACAATGGGGGCAACCCTGA…
GCF_001043915.1	Methylobacterium aquaticum DSM 16371	VP06_RS20395	Beijerinckiaceae	Methylobacterium-Methylorubrum	Rhizobiales	GCTTCCGTTTATGTTGTGATCAGCTTTGATCAGCTCTTCAACTTGAGAGTTTGATCCTGGCTCAGAGCGAACGCTGGCGGCAGGCTTAACACATGCAAGTCGAGCGGGCCCTTCGGGGTCAGCGGCAGACGGGTGAGTAACGCGTGGGAACGTGCCCTTCGGTTCGGAATAACTCAGGGAAACTTGAGCTAATACCGGATACGCCCTTTTGGGGAAAGGCTTGACTGCCGAAGGATCGGCCCGCGTCTGATTAGCTAGTTGGTGAGGTTATGGCTCACCAAGGCGACGATCAGTAGCTGGTCTGAGAGGATGATCAGCCACACTGGGACTGAGACACGGCCCAGACTCCTACGGGAGGCAGCAGTGGGGAATATTGGACAATGGGGGCAACCCTGATCC…
GCF_001043955.1	Methylobacterium tarhaniae DSM 25844	VQ03_RS15855	NA	NA	NA	GCTTCCGTTTATGTTGTGATCAGCTATGATCAGCTCTTCAACTTGAGAGTTTGATCCTGGCTCAGAGCGAACGCTGGCGGCAGGCTTAACACATGCAAGTCGAGCGG
GCF_001043955.1	Methylobacterium tarhaniae DSM 25844	VQ03_RS21160	NA	NA	NA	GCTTCCGTTTATGTTGTGATCAGCTATGATCAGCTCTTCAACTTGAGAGTTTGATCCTGGCTCAGAGCGAACGCTGGCGGCAGGCTTAACACATGCAAGTCGAGCGG
GCF_001043955.1	Methylobacterium tarhaniae DSM 25844	VQ03_RS32335	NA	NA	NA	AGCCTCCGTTTATGTTGTGATCAGCTATGATCAGCTCTTCAACTTGAGAGTTTGATCCTGGCTCAG
GCF_001043955.1	Methylobacterium tarhaniae DSM 25844	VQ03_RS06440	NA	NA	NA	GCTTCCGTTTATGTTGTGATCAGCTATGATCAGCTCTTCAACTTGAGAGTTTGATCCTGGCTCAGAGCGAACGCTGGCGGCAGGCTTAACACATGCAAGTCGAGCGG
GCF_001043955.1	Methylobacterium tarhaniae DSM 25844	VQ03_RS10365	Beijerinckiaceae	Methylobacterium-Methylorubrum	Rhizobiales	GAATAACTCAGGGAAACTTGAGCTAATACCGGATACGCCCTTCTGGGGAAAGGCTTGCTGCCGAAGGATCGGCCCGCGTCTGATTAGCTGGTTGGTGAGGTTATGGCTCACCAAGGCGACGATCAGTAGCTGGTCTGAGAGGATGATCAGCCACACTGGGACTGAGACACGGCCCAGACTCCTACGGGAGGCAGCAGTGGGGAATATTGGACAATGGGGGCAACCCTGATCCAGCCATGCCGCGTGAGTGATGACGGCCTTAGGGTTGTAAAGCTCTTTTCTCCGGGACGATAATGACGGTACCGGAGGAATAAGCCCCGGCTAACTTCGTGCCAGCAGCCGCGGTAATACGAAGGGGGCTAGCGTTGCTCGGAATCACTGGGCGTAAAGGGCGCGTAG…
GCF_001043975.1	Methylobacterium variabile DSM 16961	VQ02_RS20145	Beijerinckiaceae	Methylobacterium-Methylorubrum	Rhizobiales	GCTTCCGTTTATGTTGTGATCAGCTTTGATCAGCTCTTCAACTTGAGAGTTTGATCCTGGCTCAGAGCGAACGCTGGCGGCAGGCTTAACACATGCAAGTCGAGCGGGCATCCTTGTGGTGTCAGCGGCAGACGGGTGAGTAACGCGTGGGAACGTGCCCTTCGGTTCGGAATAACTCAGGGAAACTTGAGCTAATACCGGATACGCCCTTCTGGGGAAAGGCTTGCTGCCGAAGGATCGGCCCGCGTCTGATTAGCTGGTTGGTGAGGTTACGGCTCACCAAGGCGACGATCAGTAGCTGGTCTGAGAGGATGATCAGCCACACTGGGACTGAGACACGGCCCAGACTCCTACGGGAGGCAGCAGTGGGGAATATTGGACAATGGGGGCAACCCTGAT…
GCF_001043975.1	Methylobacterium variabile DSM 16961	VQ02_RS14235	NA	NA	NA	GCTTCCGTTTATGTTGTGATCAGCTTTGATCAGCTCTTCAACTTGAGAGTTTGATCCTGGCTCAGAGCGAACGCTGGCGGCAGGCTTAACACATGCAAGTCGAGCGGGCATCCTTGTGGT
GCF_001050155.1	Nitratireductor soli ZZ-1	AB843_RS02435	Rhizobiaceae	Nitratireductor	Rhizobiales	AACATGAGAGTTTGATCCTGGCTCAGAACGAACGCTGGCGGCAGGCTTAACACATGCAAGTCGAGCGCCCCGCAAGGGGAGCGGCAGACGGGTGAGTAACGCGTGGGAATCTACCCAGCTCTACGGAATAATTCAGGGAAACTTGGACTAATACCGTATACGTCCTTCGGGAGAAAGATTTATCGGAGTTGGATGAGCCCGCGTCTGATTAGCTAGTTGGTGGGGTAAAGGCCTACCAAGGCGACGATCAGTAGCTGGTCTGAGAGGATGATCAGCCACACTGGGACTGAGACACGGCCCAGACTCCTACGGGAGGCAGCAGTGGGGAATATTGGACAATGGGCGAAAGCCTGATCCAGCCATGCCGCGTGAGTGATGAAGGCCCTAGGGTTGTAAAGC…
GCF_001050155.1	Nitratireductor soli ZZ-1	AB843_RS25250	NA	NA	Amb-18S-504	GGTGGTGCATGGCCGTTCTTAGTTGGTGGAGCGATTTGTCTGGTTAATTCCGTTAACGAACGAGACCTCAGCCTGCTAACTAGCTATGCGGAGGGCTTCCTTCGCAGCTAGCTTCTTAGAGGGACTATGGCCTTCCAGGCCACGGAAGTTTGAGGCAATAACAGGTCTGTGATGCCCTTAGATGTTCTGGGCCGCACGCGCGCTACACTGATGTATTCAACGAGTCTATAGCCTTGGCCGACAGGCCCGGGTAATCTTTGAAATTTCATCGTGATGGGGATAGATCATTGCAATTGTTGGTCTTCAACGAGGAATTCCTAGTAAGCGCGAGTCATCAGCTCGCGTTGACTACGTCCCTGCCCTTTGTACACAC
GCF_001050495.1	Microvirga massiliensis	HMMV_RS42285	Beijerinckiaceae	Microvirga	Rhizobiales	TCTAAGTTGAGAGTTTGATCCTGGCTCAGAGCGAACGCTGGCGGCAGGCTTAACACATGCAAGTCGAACGCATCCTTCGGGATGAGTGGCAGACGGGTGAGTAACACGTGGGAACGTGCCTTCTGGTTCGGAATAACCCAGGGAAACTTGGGCTAATACCGGATACGCCCTTACGGGGAAAGATTTATCGCCGGAAGATCGGCCCGCGTCTGATTAGCTTGTTGGTGGGGTAATGGCCCACCAAGGCGACGATCAGTAGCTGGTCTGAGAGGATGATCAGCCACACTGGGACTGAGACACGGCCCAGACTCCTACGGGAGGCAGCAGTGGGGAATATTGGACAATGGGCGCAAGCCTGATCCAGCCATGCCGCGTGAGTGATGAAGGCCCTAGGGTTGT…
GCF_001187535.1	Rhizobium ecuadorense CNPSO 671	AF337_RS03890	Rhizobiaceae	Allorhizobium-Neorhizobium-Pararhizobium-Rhizobium	Rhizobiales	CAACATGAGAGTTTGATCCTGGCTCAGAACGAACGCTGGCGGCAGGCTTAACACATGCAAGTCGAGCGCCCCGCAAGGGGAGCGGCAGACGGGTGAGTAACGCGTGGGAACGTACCCTTTACTACGGAATAACGCAGGGAAACTTGTGCTAATACCGTATGTGCCCTTTGGGGGAAAGATTTATCGGTAAAGGATCGGCCCGCGTTGGATTAGCTAGTTGGTGGGGTAAAGGCCTACCAAGGCGACGATCCATAGCTGGTCTGAGAGGATGATCAGCCACATTGGGACTGAGACACGGCCCAAACTCCTACGGGAGGCAGCAGTGGGGAATATTGGACAATGGGCGCAAGCCTGATCCAGCCATGCCGCGTGAGTGATGAAGGCCCTAGGGTTGTAAAG…
GCF_001189235.2	Bradyrhizobium embrapense SEMIA 6208	AKN83_RS25445	Xanthobacteraceae	Bradyrhizobium	Rhizobiales	TCCAACTTGAGAGTTTGATCCTGGCTCAGAGCGAACGCTGGCGGCAGGCTTAACACATGCAAGTCGAGCGGGCATAGCAATATGTCAGCGGCAGACGGGTGAGTAACGCGTGGGAACGTACCTTTTGGTTCGGAACAACACAGGGAAACTTGTGCTAATACCGGATAAGCCCTTACGGGGAAAGATTTATCGCCGAAAGATCGGCCCGCGTCTGATTAGCTAGTTGGTGAGGTAATGGCTCACCAAGGCGACGATCAGTAGCTGGTCTGAGAGGATGATCAGCCACATTGGGACTGAGACACGGCCCAAACTCCTACGGGAGGCAGCAGTGGGGAATATTGGACAATGGGCGCAAGCCTGATCCAGCCATGCCGCGTGAGTGATGAAGGCCCTAGGGTT…
GCF_001189245.1	Bradyrhizobium pachyrhizi PAC 48	AKL29_RS22325	Xanthobacteraceae	Bradyrhizobium	Rhizobiales	TCCAACTTGAGAGTTTGATCCTGGCTCAGAGCGAACGCTGGCGGCAGGCTTAACACATGCAAGTCGAGCGGGCATAGCAATATGTCAGCGGCAGACGGGTGAGTAACGCGTGGGAACGTACCTTTTGGTTCGGAACAACTGAGGGAAACTTCAGCTAATACCGGATAAGCCCTTACGGGGAAAGATTTATCGCCGAAAGATCGGCCCGCGTCTGATTAGCTAGTTGGTGAGGTAATGGCTCACCAAGGCGACGATCAGTAGCTGGTCTGAGAGGATGATCAGCCACATTGGGACTGAGACACGGCCCAAACTCCTACGGGAGGCAGCAGTGGGGAATATTGGACAATGGGCGCAAGCCTGATCCAGCCATGCCGCGTGAGTGATGAAGGCCCTAGGGTT…
GCF_001189845.1	Bradyrhizobium tropiciagri SEMIA 6148	AKN84_RS38560	Xanthobacteraceae	Bradyrhizobium	Rhizobiales	TCCAACTTGAGAGTTTGATCCTGGCTCAGAGCGAACGCTGGCGGCAGGCTTAACACATGCAAGTCGAGCGGGCATAGCAATATGTCAGCGGCAGACGGGTGAGTAACGCGTGGGAACGTACCTTTTGGTTCGGAACAACTGAGGGAAACTTCAGCTAATACCGGATAAGCCCTTACGGGGAAAGATTTATCGCCGAAAGATCGGCCCGCGTCTGATTAGCTAGTTGGTGAGGTAATGGCTCACCAAGGCGACGATCAGTAGCTGGTCTGAGAGGATGATCAGCCACATTGGGACTGAGACACGGCCCAAACTCCTACGGGAGGCAGCAGTGGGGAATATTGGACAATGGGCGCAAGCCTGATCCAGCCATGCCGCGTGAGTGATGAAGGCCCTAGGGTT…
GCF_001238275.1	Bradyrhizobium viridifuturi SEMIA 690	ALC15_RS24565	Xanthobacteraceae	Bradyrhizobium	Rhizobiales	TCCAACTTGAGAGTTTGATCCTGGCTCAGAGCGAACGCTGGCGGCAGGCTTAACACATGCAAGTCGAGCGGGCATAGCAATATGTCAGCGGCAGACGGGTGAGTAACGCGTGGGAACGTACCTTTTGGTTCGGAACAACACAGGGAAACTTGTGCTAATACCGGATAAGCCCTTACGGGGAAAGATTTATCGCCGAAAGATCGGCCCGCGTCTGATTAGCTAGTTGGTGAGGTAATGGCTCACCAAGGCGACGATCAGTAGCTGGTCTGAGAGGATGATCAGCCACATTGGGACTGAGACACGGCCCAAACTCCTACGGGAGGCAGCAGTGGGGAATATTGGACAATGGGCGCAAGCCTGATCCAGCCATGCCGCGTGAGTGATGAAGGCCCTAGGGTT…
GCF_001281405.1	Bartonella ancashensis 20.00	PU02_RS00510	Rhizobiaceae	Bartonella	Rhizobiales	TCAACTTGAGAGTTTGATCCTGGCTCAGAACGAACGCTGGCGGCAGGCTTAACACATGCAAGTCGAGCGCACTCTTTATGAGTGAGCGGCAGACGGGTGAGTAACGCGTGGGAATCTACCCATCTCTACGGAATAACACAGAGAAATTTGTGCTAATACCGTATACGTCCTTAGGGAGAAAGATTTATCGGAGATGGATGAGCCCGCGTTGGATTAGCTAGTTGGTGAGGTAATGGCCCACCAAGGCGACGATCCATAGCTGGTCTGAGAGGATGATCAGCCACACTGGGACTGAGACACGGCCCAGACTCCTACGGGAGGCAGCAGTGGGGAATATTGGACAATGGGGGCAACCCTGATCCAGCCATGCCGCGTGAGTGATGAAGGCCTTAGGGTTGT…
GCF_001281405.1	Bartonella ancashensis 20.00	PU02_RS00965	Rhizobiaceae	Bartonella	Rhizobiales	TCAACTTGAGAGTTTGATCCTGGCTCAGAACGAACGCTGGCGGCAGGCTTAACACATGCAAGTCGAGCGCACTCTTTATGAGTGAGCGGCAGACGGGTGAGTAACGCGTGGGAATCTACCCATCTCTACGGAATAACACAGAGAAATTTGTGCTAATACCGTATACGTCCTTAGGGAGAAAGATTTATCGGAGATGGATGAGCCCGCGTTGGATTAGCTAGTTGGTGAGGTAATGGCCCACCAAGGCGACGATCCATAGCTGGTCTGAGAGGATGATCAGCCACACTGGGACTGAGACACGGCCCAGACTCCTACGGGAGGCAGCAGTGGGGAATATTGGACAATGGGGGCAACCCTGATCCAGCCATGCCGCGTGAGTGATGAAGGCCTTAGGGTTGT…
GCF_001402875.1	Blastochloris viridis ATCC 19567	BVIR_RS01525	Xanthobacteraceae	Blastochloris	Rhizobiales	CAACTTGAGAGTTTGATCCTGGCTCAGAGCGAACGCTGGCGGCAGGCTTAACACATGCAAGTCGAGCGCCGTAGCAATACGGAGCGGCAGACGGGTGAGTAACGCGTGGGAATGTGCCCAAAGGTACGGAACAACCAAGGGAAACTTTGGCTAATACCGTATGTGCCCGAGAGGGGAAAGATTTATTGCCTTTGGAGCAGCCCGCGTCTGATTAGCTAGTTGGTGGGGTAACGGCCCACCAAGGCGACGATCAGTAGCTGGTCTGAGAGGATGATCAGCCACACTGGGACTGAGACACGGCCCAGACTCCTACGGGAGGCAGCAGTGGGGAATATTGGACAATGGGCGCAAGCCTGATCCAGCCATGCCGCGTGAGTGATGAAGGCCTTAGGGTTGTAA…
GCF_001402875.1	Blastochloris viridis ATCC 19567	BVIR_RS01575	Xanthobacteraceae	Blastochloris	Rhizobiales	CAACTTGAGAGTTTGATCCTGGCTCAGAGCGAACGCTGGCGGCAGGCTTAACACATGCAAGTCGAGCGCCGTAGCAATACGGAGCGGCAGACGGGTGAGTAACGCGTGGGAATGTGCCCAAAGGTACGGAACAACCAAGGGAAACTTTGGCTAATACCGTATGTGCCCGAGAGGGGAAAGATTTATTGCCTTTGGAGCAGCCCGCGTCTGATTAGCTAGTTGGTGGGGTAACGGCCCACCAAGGCGACGATCAGTAGCTGGTCTGAGAGGATGATCAGCCACACTGGGACTGAGACACGGCCCAGACTCCTACGGGAGGCAGCAGTGGGGAATATTGGACAATGGGCGCAAGCCTGATCCAGCCATGCCGCGTGAGTGATGAAGGCCTTAGGGTTGTAA…
GCF_001402875.1	Blastochloris viridis ATCC 19567	BVIR_RS01550	Xanthobacteraceae	Blastochloris	Rhizobiales	CAACTTGAGAGTTTGATCCTGGCTCAGAGCGAACGCTGGCGGCAGGCTTAACACATGCAAGTCGAGCGCCGTAGCAATACGGAGCGGCAGACGGGTGAGTAACGCGTGGGAATGTGCCCAAAGGTACGGAACAACCAAGGGAAACTTTGGCTAATACCGTATGTGCCCGAGAGGGGAAAGATTTATTGCCTTTGGAGCAGCCCGCGTCTGATTAGCTAGTTGGTGGGGTAACGGCCCACCAAGGCGACGATCAGTAGCTGGTCTGAGAGGATGATCAGCCACACTGGGACTGAGACACGGCCCAGACTCCTACGGGAGGCAGCAGTGGGGAATATTGGACAATGGGCGCAAGCCTGATCCAGCCATGCCGCGTGAGTGATGAAGGCCTTAGGGTTGTAA…
GCF_001418005.1	Chelatococcus sambhunathii DSM 18167	ASC46_RS19000	Beijerinckiaceae	Chelatococcus	Rhizobiales	TTCAACTTGAGAGTTTGATCCTGGCTCAGAGCGAACGCTGGCGGCAGGCCTAACACATGCAAGTCGAACGGTTCCTTCGGGGACAGTGGCAGACGGGTGAGTAACGCGTGGGAACGTGCCCTTTGGTTCGGAATAACTCAGGGAAACTTGAGCTAATACCGGATACGTCCGAGAGGAGAAAGATTTATCGCCGAAGGATCGGCCCGCGTCTGATTAGCTAGTTGGTGGGGTAACGGCCTACCAAGGCGACGATCAGTAGCTGGTCTGAGAGGATGATCAGCCACACTGGGACTGAGACACGGCCCAGACTCCTACGGGAGGCAGCAGTGGGGAATATTGGACAATGGGCGCAAGCCTGATCCAGCCATGCCGCGTGAGTGATGAAGGCCCTAGGGTTGT…
GCF_001440035.1	Bradyrhizobium manausense BR 3351	AOQ71_RS12790	Xanthobacteraceae	Bradyrhizobium	Rhizobiales	TCCAACTTGAGAGTTTGATCCTGGCTCAGAGCGAACGCTGGCGGCAGGCTTAACACATGCAAGTCGAGCGGGCGTAGCAATACGTCAGCGGCAGACGGGTGAGTAACGCGTGGGAACGTACCTTTTGGTTCGGAACAACACAGGGAAACTTGTGCTAATACCGGATAAGCCCTTACGGGGAAAGATTTATCGCCGAAAGATCGGCCCGCGTCTGATTAGCTAGTTGGTAGGGTAATGGCCTACCAAGGCGACGATCAGTAGCTGGTCTGAGAGGATGATCAGCCACATTGGGACTGAGACACGGCCCAAACTCCTACGGGAGGCAGCAGTGGGGAATATTGGACAATGGGGGCAACCCTGATCCAGCCATGCCGCGTGAGTGATGAAGGCCCTAGGGTT…
GCF_001440035.1	Bradyrhizobium manausense BR 3351	AOQ71_RS46560	NA	NA	NA	GATGAGCCAGAATTGGCACCTTGTCTATAAATAAGGTGCAAAATGATTTTAACTGAAGAGTTTGATCATGGCTCAGATTGAACGCTGGCGGCAGGCTTAACACATGCAAGTCGAGCGG
GCF_001440395.1	Bradyrhizobium jicamae PAC68	CQ12_RS39410	Streptomycetaceae	Streptomyces	Streptomycetales	CATTCACGGAGAGTTTGATCCTGGCTCAGGACGAACGCTGGCGGCGTGCTTAACACATGCAAGTCGAACGATGAACCTCCTTCGGGAGGGGATTAGTGGCGAACGGGTGAGTAACACGTGGGCAATCTGCCCTGCACTCTGGGACAAGCCCTGGAAACGGGGTCTAATACCGGATATGACTCAGGACCGCATGGTCTCTGGGTGGAAAGCTCCGGCGGTGCAGGATGAGCCCGCGGCCTATCAGCTTGTTGGTGAGGTAACGGCTCACCAAGGCGACGACGNNNNNNNNNNNNNNNNNNNNNNNNNNNNNNNNNNNNNNNNNNNNNNNNNNNNNNNNNNNNNNNNNNNNGAGAGGGCGACCGGCCACACTGGGACTGAGACACGGCCCAGACTCCTACG…
GCF_001440395.1	Bradyrhizobium jicamae PAC68	CQ12_RS14295	Xanthobacteraceae	Bradyrhizobium	Rhizobiales	TCCAACTTGAGAGTTTGATCCTGGCTCAGAGCGAACGCTGGCGGCAGGCTTAACACATGCAAGTCGAGCGGGCGTAGCAATACGTCAGCGGCAGACGGGTGAGTAACGCGTGGGAACGTACCTTTTGGTTCGGAACAACACAGGGAAACTTGTGCTAATACCGGATAAGCCCTTACGGGGAAAGATTTATCGCCGAAAGATCGGCCCGCGTCTGATTAGCTAGTTGGTGAGGTAATGGCTCACCAAGGCGACGATCAGTAGCTGGTCTGAGAGGATGATCAGCCACATTGGGACTGAGACACGGCCCAAACTCCTACGGGAGGCAGCAGTGGGGAATATTGGACAATGGGCGCAAGCCTGATCCAGCCATGCCGCGTGAGTGATGAAGGCCCTAGGGTT…
GCF_001440405.1	Bradyrhizobium valentinum LmjM3	CP49_RS37625	Xanthobacteraceae	Bradyrhizobium	Rhizobiales	TCCAACTTGAGAGTTTGATCCTGGCTCAGAGCGAACGCTGGCGGCAGGCTTAACACATGCAAGTCGAGCGGGCGTAGCAATACGTCAGCGGCAGACGGGTGAGTAACGCGTGGGAACGTACCTTTTGGTTCGGAACAACCCAGGGAAACTTGGGCTAATACCGGATAAGCCCTTACGGGGAAAGATTTATCGCCGAAAGATCGGCCCGCGTCTGATTAGCTAGTTGGTGAGGTAATGGCTCACCAAGGCGACGATCAGTAGCTGGTCTGAGAGGATGATCAGCCACATTGGGACTGAGACACGGCCCAAACTCCTACGGGAGGCAGCAGTGGGGAATATTGGACAATGGGCGCAAGCCTGATCCAGCCATGCCGCGTGAGTGATGAAGGCCCTAGGGTT…
GCF_001440415.1	Bradyrhizobium retamae Ro19	CQ13_RS03320	Xanthobacteraceae	Bradyrhizobium	Rhizobiales	TCCAACTTGAGAGTTTGATCCTGGCTCAGAGCGAACGCTGGCGGCAGGCTTAACACATGCAAGTCGAGCGGGCGTAGCAATACGTCAGCGGCAGACGGGTGAGTAACGCGTGGGAACGTACCTTTTGGTTCGGAACAACCCAGGGAAACTTGGGCTAATACCGGATAAGCCCTTACGGGGAAAGATTTATCGCCGAAAGATCGGCCCGCGTCTGATTAGCTAGTTGGTGAGGTAATGGCTCACCAAGGCGACGATCAGTAGCTGGTCTGAGAGGATGATCAGCCACATTGGGACTGAGACACGGCCCAAACTCCTACGGGAGGCAGCAGTGGGGAATATTGGACAATGGGCGCAAGCCTGATCCAGCCATGCCGCGTGAGTGATGAAGGCCCTAGGGTT…
GCF_001440475.1	Bradyrhizobium lablabi CCBAU 23086	CQ14_RS15590	Xanthobacteraceae	Bradyrhizobium	Rhizobiales	TCCAACTTGAGAGTTTGATCCTGGCTCAGAGCGAACGCTGGCGGCAGGCTTAACACATGCAAGTCGAGCGGGCGTAGCAATACGTCAGCGGCAGACGGGTGAGTAACGCGTGGGAACGTACCTTTTGGTTCGGAACAACCCAGGGAAACTTGGGCTAATACCGGATAAGCCCTTACGGGGAAAGATTTATCGCCGAAAGATCGGCCCGCGTCTGATTAGCTAGTTGGTGAGGTAACGGCTCACCAAGGCGACGATCAGTAGCTGGTCTGAGAGGATGATCAGCCACATTGGGACTGAGACACGGCCCAAACTCCTACGGGAGGCAGCAGTGGGGAATATTGGACAATGGGCGCAAGCCTGATCCAGCCATGCCGCGTGAGTGATGAAGGCCCTAGGGTT…
GCF_001461695.1	Sinorhizobium fredii USDA 205	N181_RS10335	Rhizobiaceae	Ensifer	Rhizobiales	CCAAGGCGACGATCCATAGCTGGTCTGAGAGGATGATCAGCCACATTGGGACTGAGACACGGCCCAAACTCCTACGGGAGGCAGCAGTGGGGAATATTGGACAATGGGCGCAAGCCTGATCCAGCCATGCCGCGTGAGTGATGAAGGCCCTAGGGTTGTAAAGCTCTTTCACCGGTGAAGATAATGACGGTAACCGGAGAAGAAGCCCCGGCTAACTTCGTGCCAGCAGCCGCGGTAATACGAAGGGGGCTAGCGTTGTTCGGAATTACTGGGCGTAAAGCGCACGTAGGCGGACATTTAAGTCAGGGGTGAAATCCCGGGGCTCAACCCCGGAACTGCCTTTGATACTGGGTGTCTAGAGTCCGGAAGAGGTGAGTGGAATTCCGAGTGTAGAGGTGA…
GCF_001463825.1	Aurantimonas coralicida DSM 14790	AUL29_RS19925	Rhizobiaceae	Aurantimonas	Rhizobiales	AACCTGAGAGTTTGATCCTGGCTCAGAACGAACGCTGGCGGCAGGCTTAACACATGCAAGTCGAACGCATCCTTCGGGGTGAGTGGCAGACGGGTGAGTAACGCGTGGGAATCTACCCATCCCTACGGGATAGCTCCGGGAAACTGGAGATAATACCGTATACGTCCTCCGGGAGAAAGATTTATCGGGGATGGATGAGCCCGCGTTGGATTAGCTAGTTGGTGGGGTAATGGCCTACCAAGGCGACGATCCATAGCTGGTCTAAGAGGATGATCAGCCACATTGGGACTGAGACACGGCCCAAACTCCTACGGGAGGCAGCAGTGGGGAATATTGGACAATGGGCGCAAGCCTGATCCAGCCATGCCGCGTGAGTGATGAAGGCCCTAGGGTTGTAAA…
GCF_001463845.1	Fulvimarina pelagi DSM 15513	AUL26_RS14830	Rhizobiaceae	Fulvimarina	Rhizobiales	GAACCTGAGAGTTTGATCCTGGCTCAGAACGAACGCTGGCGGCAGGCTTAACACATGCAAGTCGAGCGCATCCTTCGGGGTGAGCGGCAGACGGGTGAGTAACGCGTGGGAATCTACCCATCCCTACGGGATAGCTCCGGGAAACTGGAATTAAGACCGTATACGTCCGTAAGGAGAAAGATTTATCGGGGATGGATGAGCCCGCGTAGGATTAGCTAGTTGGTGCGGTAACGGCGTACCAAGGCGACGATCCTTAGCTGGTCTAAGAGGATGATCAGCCACACTGGGACTGAGACACGGCCCAGACTCCTACGGGAGGCAGCAGTGGGGAATATTGGACAATGGGCGCAAGCCTGATCCAGCCATGCCGCGTGAGTGATGACGGTCTTAGGATTGTAA…
GCF_001463865.1	Aurantimonas manganoxydans SI85-9A1 DSM 21871	AUL25_RS09245	Rhizobiaceae	Aurantimonas	Rhizobiales	AACCTGAGAGTTTGATCCTGGCTCAGAACGAACGCTGGCGGCAGGCTTAACACATGCAAGTCGAACGCATCCTTCGGGATGAGTGGCAGACGGGTGAGTAACGCGTGGGAATCTACCCATCCCTACGGGATAGCTCCGGGAAACTGGAGATAATACCGTATACGTCCTCCGGGAGAAAGATTTATCGGGGATGGATGAGCCCGCGTTGGATTAGCTAGTTGGTGGGGTAATGGCCTACCAAGGCGACGATCCATAGCTGGTCTAAGAGGATGATCAGCCACATTGGGACTGAGACACGGCCCAAACTCCTACGGGAGGCAGCAGTGGGGAATATTGGACAATGGGCGCAAGCCTGATCCAGCCATGCCGCGTGAGTGATGAAGGCCCTAGGGTTGTAAA…
GCF_001463885.1	Aureimonas altamirensis DSM 21988	AUL31_RS14610	Rhizobiaceae	Aureimonas	Rhizobiales	AACCTGAGAGTTTGATCCTGGCTCAGAACGAACGCTGGCGGCAGGCTTAACACATGCAAGTCGAACGCACCTTTCGGGGTGAGTGGCAGACGGGTGAGTAACGCGTGGGAATCTACCCTTCTCTACGGGATAGCTCCGGGAAACTGGAATTAATACCGTATACGTCCTGAGGGAGAAAGATTTATCGGGGAAGGATGAGCCCGCGTTGGATTAGCTAGTTGGTGGGGTAAAGGCCTACCAAGGCGACGATCCATAGCTGGTCTAAGAGGATGATCAGCCACATTGGGACTGAGACACGGCCCAAACTCCTACGGGAGGCAGCAGTGGGGAATATTGGACAATGGGCGCAAGCCTGATCCAGCCATGCCGCGTGAGTGATGAAGGCCCTAGGGTTGTAAA…
GCF_001463905.1	Aureimonas frigidaquae JCM 14755	AUL30_RS00005	Rhizobiaceae	Aureimonas	Rhizobiales	AACCTGAGAGTTTGATCCTGGCTCAGAACGAACGCTGGCGGCAGGCTTAACACATGCAAGTCGAACGCATCCTTCGGGATGAGTGGCAGACGGGTGAGTAACGCGTGGGAATCTACCCATCCCTACGGGATAGCTCCGGGAAACTGGAATTAATACCGTATACGTCCTTCGGGAGAAAGATTTATCGGGGATGGATGAGCCCGCGTTGGATTAGCTAGTTGGTGGGGTAAAGGCCTACCAAGGCGACGATCCATAGCTGGTCTAAGAGGATGATCAGCCACATTGGGACTGAGACACGGCCCAAACTCCTACGGGAGGCAGCAGTGGGGAATATTGGACAATGGGCGCAAGCCTGATCCAGCCATGCCGCGTGAGTGATGAAGGCCCTAGGGTTGTAAA…
GCF_001463945.1	Aureimonas ureilytica DSM 18598 = NBRC 106430	AUL27_RS23465	Rhizobiaceae	Aureimonas	Rhizobiales	AACCTGAGAGTTTGATCCTGGCTCAGAACGAACGCTGGCGGCAGGCTTAACACATGCAAGTCGAGCGCCCCGCAAGGGGAGCGGCAGACGGGTGAGTAACGCGTGGGAATCTACCCTGATCTGCGGAATAGCTCCGGGAAACTGGAATTAATACCGCATGTGCCCTGAGGGGCAAAGATTTATCGGTTCAGGATGAGCCCGCGTCCGATTAGCTAGTTGGTGGGGTAAAGGCCTACCAAGGCGACGATCGGTAGCTGGTCTAAGAGGATGATCAGCCACATTGGGACTGAGACACGGCCCAAACTCCTACGGGAGGCAGCAGTGGGGAATATTGGACAATGGGCGCAAGCCTGATCCAGCCATGCCGCGTGAGTGATGAAGGCCCTAGGGTTGTAAAGC…
GCF_001517345.1	Chelatococcus sambhunathii DSM 18167	AWT66_RS19195	Beijerinckiaceae	Chelatococcus	Rhizobiales	TTCAACTTGAGAGTTTGATCCTGGCTCAGAGCGAACGCTGGCGGCAGGCCTAACACATGCAAGTCGAACGGTTCCTTCGGGGACAGTGGCAGACGGGTGAGTAACGCGTGGGAACGTGCCCTTTGGTTCGGAATAACTCAGGGAAACTTGAGCTAATACCGGATACGTCCGAGAGGAGAAAGATTTATCGCCGAAGGATCGGCCCGCGTCTGATTAGCTAGTTGGTGGGGTAACGGCCTACCAAGGCGACGATCAGTAGCTGGTCTGAGAGGATGATCAGCCACACTGGGACTGAGACACGGCCCAGACTCCTACGGGAGGCAGCAGTGGGGAATATTGGACAATGGGCGCAAGCCTGATCCAGCCATGCCGCGTGAGTGATGAAGGCCCTAGGGTTGT…
GCF_001525625.2	Bartonella henselae Houston-1 FDAARGOS_175	AL470_RS06300	Rhizobiaceae	Bartonella	Rhizobiales	TCAATATGAGAGTTTGATCCTGGCTCAGAACGAACGCTGGCGGCAGGCTTAACACATGCAAGTCGAGCGCACTCTTTTAGAGTGAGCGGCAAACGGGTGAGTAACGCGTGGGAATCTACCCATCTCTACGGAATAACACAGAGAAATTTGTGCTAATACCGTATACGTCCTTAGGGAGAAAGATTTATCGGAGATGGATGAGCCCGCGTTGGATTAGCTAGTTGGTGAGGTAACGGCTCACCAAGGCGACGATCCATAGCTGGTCTGAGAGGATGATCAGCCACACTGGGACTGAGACACGGCCCAGACTCCTACGGGAGGCAGCAGTGGGGAATATTGGACAATGGGGGCAACCCTGATCCAGCCATGCCGCGTGAGTGATGAAGGCCCTAGGGTTGT…
GCF_001525625.2	Bartonella henselae Houston-1 FDAARGOS_175	AL470_RS05655	Rhizobiaceae	Bartonella	Rhizobiales	TCAATATGAGAGTTTGATCCTGGCTCAGAACGAACGCTGGCGGCAGGCTTAACACATGCAAGTCGAGCGCACTCTTTTAGAGTGAGCGGCAAACGGGTGAGTAACGCGTGGGAATCTACCCATCTCTACGGAATAACACAGAGAAATTTGTGCTAATACCGTATACGTCCTTAGGGAGAAAGATTTATCGGAGATGGATGAGCCCGCGTTGGATTAGCTAGTTGGTGAGGTAACGGCTCACCAAGGCGACGATCCATAGCTGGTCTGAGAGGATGATCAGCCACACTGGGACTGAGACACGGCCCAGACTCCTACGGGAGGCAGCAGTGGGGAATATTGGACAATGGGGGCAACCCTGATCCAGCCATGCCGCGTGAGTGATGAAGGCCCTAGGGTTGT…
GCF_001541305.1	Agrobacterium tumefaciens NCPPB 3001	ASH09_RS12220	Rhizobiaceae	Allorhizobium-Neorhizobium-Pararhizobium-Rhizobium	Rhizobiales	TCAACTTGAGAGTTTGATCCTGGCTCAGAACGAACGCTGGCGGCAGGCTTAACACATGCAAGTCGAACGCCCCGCAAGGGGAGTGGCAGACGGGTGAGTAACGCGTGGGAACATACCCTTTCCTGCGGAATAGCTCCGGGAAACTGGAATTAATACCGCATACGCCCTACGGGGGAAAGATTTATCGGGGAAGGATTGGCCCGCGTTGGATTAGCTAGTTGGTGGGGTAAAGGCCTACCAAGGCGACGATCCATAGCTGGTCTGAGAGGATGATCAGCCACATTGGGACTGAGACACGGCCCAAACTCCTACGGGAGGCAGCAGTGGGGAATATTGGACAATGGGCGCAAGCCTGATCCAGCCATGCCGCGTGAGTGATGAAGGCCTTAGGGTTGTAAA…
GCF_001541315.1	Agrobacterium tumefaciens B6	ASB65_RS19105	Rhizobiaceae	Allorhizobium-Neorhizobium-Pararhizobium-Rhizobium	Rhizobiales	TCAACTTGAGAGTTTGATCCTGGCTCAGAACGAACGCTGGCGGCAGGCTTAACACATGCAAGTCGAACGCCCCGCAAGGGGAGTGGCAGACGGGTGAGTAACGCGTGGGAACATACCCTTTCCTGCGGAATAGCTCCGGGAAACTGGAATTAATACCGCATACGCCCTACGGGGGAAAGATTTATCGGGGAAGGATTGGCCCGCGTTGGATTAGCTAGTTGGTGGGGTAAAGGCCTACCAAGGCGACGATCCATAGCTGGTCTGAGAGGATGATCAGCCACATTGGGACTGAGACACGGCCCAAACTCCTACGGGAGGCAGCAGTGGGGAATATTGGACAATGGGCGCAAGCCTGATCCAGCCATGCCGCGTGAGTGATGAAGGCCTTAGGGTTGTAAA…
GCF_001541345.2	Agrobacterium vitis NCPPB 3554	ASB66_RS25940	Rhizobiaceae	Allorhizobium-Neorhizobium-Pararhizobium-Rhizobium	Rhizobiales	TCAACTTGAGAGTTTGATCCTGGCTCAGAACGAACGCTGGCGGCAGGCTTAACACATGCAAGTCGAGCGCCTCGCAAGAGGAGCGGCAGACGGGTGAGTAACGCGTGGGAATCTACCGTACCCTACGGAATAGCTCCGGGAAACTGGAATTAATACCGTATACGCCCTTCGGGGGAAAGATTTATCGGGGTATGATGAGCCCGCGTTGGATTAGCTAGTTGGTGGGGTAAAGGCCTACCAAGGCGACGATCCATAGCTGGTCTGAGAGGATGATCAGCCACATTGGGACTGAGACACGGCCCAAACTCCTACGGGAGGCAGCAGTGGGGAATATTGGACAATGGGCGCAAGCCTGATCCAGCCATGCCGCGTGAGTGATGAAGGTCTTAGGATTGTAAA…
GCF_001542405.1	Rhizobium altiplani BR 10423	AS026_RS08355	Rhizobiaceae	Allorhizobium-Neorhizobium-Pararhizobium-Rhizobium	Rhizobiales	TCAACATGAGAGTTTGATCCTGGCTCAGAACGAACGCTGGCGGCAGGCTTAACACATGCAAGTCGAGCGCCCCGCAAGGGGAGCGGCAGACGGGTGAGTAACGCGTGGGAACGTACCCTTTTCTACGGAATAACCCAGGGAAACTTGGACTAATACCGTATGTGCCCTTCGGGGGAAAGATTTATCGGAAAAGGATCGGCCCGCGTTGGATTAGCTAGTTGGTGGGGTAAAGGCCTACCAAGGCGACGATCCATAGCTGGTCTGAGAGGATGATCAGCCACATTGGGACTGAGACACGGCCCAAACTCCTACGGGAGGCAGCAGTGGGGAATATTGGACAATGGGCGCAAGCCTGATCCAGCCATGCCGCGTGAGTGATGAAGGCCCTAGGGTTGTAAA…
GCF_001542405.1	Rhizobium altiplani BR 10423	AS026_RS12835	Rhizobiaceae	Allorhizobium-Neorhizobium-Pararhizobium-Rhizobium	Rhizobiales	TCAACATGAGAGTTTGATCCTGGCTCAGAACGAACGCTGGCGGCAGGCTTAACACATGCAAGTCGAGCGCCCCGCAAGGGGAGCGGCAGACGGGTGAGTAACGCGTGGGAACGTACCCTTTTCTACGGAATAACCCAGGGAAACTTGGACTAATACCGTATGTGCCCTTCGGGGGAAAGATTTATCGGAAAAGGATCGGCCCGCGTTGGATTAGCTAGTTGGTGGGGTAAAGGCCTACCAAGGCGACGATCCATAGCTGGTCTGAGAGGATGATCAGCCACATTGGGACTGAGACACGGCCCAAACTCCTACGGGAGGCAGCAGTGGGGAATATTGGACAATGGGCGCAAGCCTGATCCAGCCATGCCGCGTGAGTGATGAAGGCCCTAGGGTTGTAAA…
GCF_001542405.1	Rhizobium altiplani BR 10423	AS026_RS27185	Rhizobiaceae	Allorhizobium-Neorhizobium-Pararhizobium-Rhizobium	Rhizobiales	TCAACATGAGAGTTTGATCCTGGCTCAGAACGAACGCTGGCGGCAGGCTTAACACATGCAAGTCGAGCGCCCCGCAAGGGGAGCGGCAGACGGGTGAGTAACGCGTGGGAACGTACCCTTTTCTACGGAATAACCCAGGGAAACTTGGACTAATACCGTATGTGCCCTTCGGGGGAAAGATTTATCGGAAAAGGATCGGCCCGCGTTGGATTAGCTAGTTGGTGGGGTAAAGGCCTACCAAGGCGACGATCCATAGCTGGTCTGAGAGGATGATCAGCCACATTGGGACTGAGACACGGCCCAAACTCCTACGGGAGGCAGCAGTGGGGAATATTGGACAATGGGCGCAAGCCTGATCCAGCCATGCCGCGTGAGTGATGAAGGCCCTAGGGTTGTAAA…
GCF_001542405.1	Rhizobium altiplani BR 10423	AS026_RS27940	Rhizobiaceae	Allorhizobium-Neorhizobium-Pararhizobium-Rhizobium	Rhizobiales	TCAACATGAGAGTTTGATCCTGGCTCAGAACGAACGCTGGCGGCAGGCTTAACACATGCAAGTCGAGCGCCCCGCAAGGGGAGCGGCAGACGGGTGAGTAACGCGTGGGAACGTACCCTTTTCTACGGAATAACCCAGGGAAACTTGGACTAATACCGTATGTGCCCTTCGGGGGAAAGATTTATCGGAAAAGGATCGGCCCGCGTTGGATTAGCTAGTTGGTGGGGTAAAGGCCTACCAAGGCGACGATCCATAGCTGGTCTGAGAGGATGATCAGCCACATTGGGACTGAGACACGGCCCAAACTCCTACGGGAGGCAGCAGTGGGGAATATTGGACAATGGGCGCAAGCCTGATCCAGCCATGCCGCGTGAGTGATGAAGGCCCTAGGGTTGTAAA…
GCF_001542405.1	Rhizobium altiplani BR 10423	AS026_RS28245	Rhizobiaceae	Allorhizobium-Neorhizobium-Pararhizobium-Rhizobium	Rhizobiales	TCAACATGAGAGTTTGATCCTGGCTCAGAACGAACGCTGGCGGCAGGCTTAACACATGCAAGTCGAGCGCCCCGCAAGGGGAGCGGCAGACGGGTGAGTAACGCGTGGGAACGTACCCTTTTCTACGGAATAACCCAGGGAAACTTGGACTAATACCGTATGTGCCCTTCGGGGGAAAGATTTATCGGAAAAGGATCGGCCCGCGTTGGATTAGCTAGTTGGTGGGGTAAAGGCCTACCAAGGCGACGATCCATAGCTGGTCTGAGAGGATGATCAGCCACATTGGGACTGAGACACGGCCCAAACTCCTACGGGAGGCAGCAGTGGGGAATATTGGACAATGGGCGCAAGCCTGATCCAGCCATGCCGCGTGAGTGATGAAGGCCCTAGGGTTGTAAA…
GCF_001542405.1	Rhizobium altiplani BR 10423	AS026_RS28430	Rhizobiaceae	Allorhizobium-Neorhizobium-Pararhizobium-Rhizobium	Rhizobiales	TCAACATGAGAGTTTGATCCTGGCTCAGAACGAACGCTGGCGGCAGGCTTAACACATGCAAGTCGAGCGCCCCGCAAGGGGAGCGGCAGACGGGTGAGTAACGCGTGGGAACGTACCCTTTTCTACGGAATAACCCAGGGAAACTTGGACTAATACCGTATGTGCCCTTCGGGGGAAAGATTTATCGGAAAAGGATCGGCCCGCGTTGGATTAGCTAGTTGGTGGGGTAAAGGCCTACCAAGGCGACGATCCATAGCTGGTCTGAGAGGATGATCAGCCACATTGGGACTGAGACACGGCCCAAACTCCTACGGGAGGCAGCAGTGGGGAATATTGGACAATGGGCGCAAGCCTGATCCAGCCATGCCGCGTGAGTGATGAAGGCCCTAGGGTTGTAAA…
GCF_001542415.1	Bradyrhizobium macuxiense BR 10303	AS156_RS04825	Xanthobacteraceae	Bradyrhizobium	Rhizobiales	TCCAACTTGAGAGTTTGATCCTGGCTCAGAGCGAACGCTGGCGGCAGGCTTAACACATGCAAGTCGAGCGGGCGTAGCAATACGTCAGCGGCAGACGGGTGAGTAACGCGTGGGAACGTACCTTTTGGTTCGGAACAACTGAGGGAAACTTCAGCTAATACCGGATAAGCCCTTACGGGGAAAGATTTATCGCCGAAAGATCGGCCCGCGTCTGATTAGCTAGTTGGTGAGGTAATGGCTCACCAAGGCGACGATCAGTAGCTGGTCTGAGAGGATGATCAGCCACATTGGGACTGAGACACGGCCCAAACTCCTACGGGAGGCAGCAGTGGGGAATATTGGACAATGGGCGCAAGCCTGATCCAGCCATGCCGCGTGAGTGATGAAGGCCCTAGGGTT…
GCF_001548155.2	Blastochloris viridis DSM 133	BV133_RS04225	Xanthobacteraceae	Blastochloris	Rhizobiales	CAACTTGAGAGTTTGATCCTGGCTCAGAGCGAACGCTGGCGGCAGGCTTAACACATGCAAGTCGAGCGCCGTAGCAATACGGAGCGGCAGACGGGTGAGTAACGCGTGGGAATGTGCCCAAAGGTACGGAACAACCAAGGGAAACTTTGGCTAATACCGTATGTGCCCGAGAGGGGAAAGATTTATTGCCTTTGGAGCAGCCCGCGTCTGATTAGCTAGTTGGTGGGGTAACGGCCCACCAAGGCGACGATCAGTAGCTGGTCTGAGAGGATGATCAGCCACACTGGGACTGAGACACGGCCCAGACTCCTACGGGAGGCAGCAGTGGGGAATATTGGACAATGGGCGCAAGCCTGATCCAGCCATGCCGCGTGAGTGATGAAGGCCTTAGGGTTGTAA…
GCF_001548155.2	Blastochloris viridis DSM 133	BV133_RS04200	Xanthobacteraceae	Blastochloris	Rhizobiales	CAACTTGAGAGTTTGATCCTGGCTCAGAGCGAACGCTGGCGGCAGGCTTAACACATGCAAGTCGAGCGCCGTAGCAATACGGAGCGGCAGACGGGTGAGTAACGCGTGGGAATGTGCCCAAAGGTACGGAACAACCAAGGGAAACTTTGGCTAATACCGTATGTGCCCGAGAGGGGAAAGATTTATTGCCTTTGGAGCAGCCCGCGTCTGATTAGCTAGTTGGTGGGGTAACGGCCCACCAAGGCGACGATCAGTAGCTGGTCTGAGAGGATGATCAGCCACACTGGGACTGAGACACGGCCCAGACTCCTACGGGAGGCAGCAGTGGGGAATATTGGACAATGGGCGCAAGCCTGATCCAGCCATGCCGCGTGAGTGATGAAGGCCTTAGGGTTGTAA…
GCF_001548155.2	Blastochloris viridis DSM 133	BV133_RS04175	Xanthobacteraceae	Blastochloris	Rhizobiales	CAACTTGAGAGTTTGATCCTGGCTCAGAGCGAACGCTGGCGGCAGGCTTAACACATGCAAGTCGAGCGCCGTAGCAATACGGAGCGGCAGACGGGTGAGTAACGCGTGGGAATGTGCCCAAAGGTACGGAACAACCAAGGGAAACTTTGGCTAATACCGTATGTGCCCGAGAGGGGAAAGATTTATTGCCTTTGGAGCAGCCCGCGTCTGATTAGCTAGTTGGTGGGGTAACGGCCCACCAAGGCGACGATCAGTAGCTGGTCTGAGAGGATGATCAGCCACACTGGGACTGAGACACGGCCCAGACTCCTACGGGAGGCAGCAGTGGGGAATATTGGACAATGGGCGCAAGCCTGATCCAGCCATGCCGCGTGAGTGATGAAGGCCTTAGGGTTGTAA…
GCF_001558695.1	Paramesorhizobium deserti A-3-E	ATN84_RS06755	Rhizobiaceae	Paramesorhizobium	Rhizobiales	TCAACTTGAGAGTTTGATCCTGGCTCAGAACGAACGCTGGCGGCAGGCTTAACACATGCAAGTCGAACGCCCTCTTCGGAGGGAGTGGCAGACGGGTGAGTAACGCGTGGGAATCTACCCATCTCTACGGAACAACTCCGGGAAACTGGAGCTAATACCGTATACGTCCTTTTGGAGAAAGATTTATCGGAGATGGATGAGCCCGCGTTGGATTAGCTAGTTGGTGGGGTAAAGGCCTACCAAGGCGACGATCCATAGCTGGTCTGAGAGGATGATCAGCCACACTGGGACTGAGACACGGCCCAGACTCCTACGGGAGGCAGCAGTGGGGAATATTGGACAATGGGCGCAAGCCTGATCCAGCCATGCCGCGTGAGTGATGAAGGCCCTAGGGTTGTA…
GCF_001559035.2	Bartonella bacilliformis FDAARGOS_174	AL467_RS01345	Rhizobiaceae	Bartonella	Rhizobiales	TCAACTTGAGAGTTTGATCCTGGCTCAGAACGAACGCTGGCGGCAGGCTTAACACATGCAAGTCGAGCGCACTCTTTTTGAGTGAGCGGCAGACGGGTGAGTAACGCGTGGGAATCTACCCATCTCTACGGAATAACACAGAGAAATTTGTGCTAATACCGTATACGTCCTTCGGGAGAAAGATTTATCGGAGATGGATGAGCCCGCGTTGGATTAGCTAGTTGGTGAGGTAACGGCCCACCAAGGCGACGATCCATAGCTGGTCTGAGAGGATGATCAGCCACACTGGGACTGAGACACGGCCCAGACTCCTACGGGAGGCAGCAGTGGGGAATATTGGACAATGGGGGCAACCCTGATCCAGCCATGCCGCGTGAGTGATGAAGGCCTTAGGGTTGT…
GCF_001559035.2	Bartonella bacilliformis FDAARGOS_174	AL467_RS05230	Rhizobiaceae	Bartonella	Rhizobiales	TCAACTTGAGAGTTTGATCCTGGCTCAGAACGAACGCTGGCGGCAGGCTTAACACATGCAAGTCGAGCGCACTCTTTTTGAGTGAGCGGCAGACGGGTGAGTAACGCGTGGGAATCTACCCATCTCTACGGAATAACACAGAGAAATTTGTGCTAATACCGTATACGTCCTTCGGGAGAAAGATTTATCGGAGATGGATGAGCCCGCGTTGGATTAGCTAGTTGGTGAGGTAACGGCCCACCAAGGCGACGATCCATAGCTGGTCTGAGAGGATGATCAGCCACACTGGGACTGAGACACGGCCCAGACTCCTACGGGAGGCAGCAGTGGGGAATATTGGACAATGGGGGCAACCCTGATCCAGCCATGCCGCGTGAGTGATGAAGGCCTTAGGGTTGT…
GCF_001605015.1	Aminobacter aminovorans KCTC 2477	AA2016_RS03035	Rhizobiaceae	Aminobacter	Rhizobiales	AACTTGAGAGTTTGATCCTGGCTCAGAACGAACGCTGGCGGCAGGCTTAACACATGCAAGTCGAGCGCCCCGCAAGGGGAGCGGCAGACGGGTGAGTAACGCGTGGGAATCTACCCAGCTCTACGGAATAACTCAGGGAAACTTGTGCTAATACCGTATACGTCCGATAGGAGAAAGATTTATCGGAGTTGGATGAGCCCGCGTTGGATTAGCTAGTTGGTGGGGTAAAGGCCTACCAAGGCGACGATCCATAGCTGGTCTGAGAGGATGATCAGCCACACTGGGACTGAGACACGGCCCAGACTCCTACGGGAGGCAGCAGTGGGGAATATTGGACAATGGGCGCAAGCCTGATCCAGCCATGCCGCGTGAGTGATGAAGGCCCTAGGGTTGTAAAGC…
GCF_001605015.1	Aminobacter aminovorans KCTC 2477	AA2016_RS03000	Rhizobiaceae	Aminobacter	Rhizobiales	AACTTGAGAGTTTGATCCTGGCTCAGAACGAACGCTGGCGGCAGGCTTAACACATGCAAGTCGAGCGCCCCGCAAGGGGAGCGGCAGACGGGTGAGTAACGCGTGGGAATCTACCCAGCTCTACGGAATAACTCAGGGAAACTTGTGCTAATACCGTATACGTCCGATAGGAGAAAGATTTATCGGAGTTGGATGAGCCCGCGTTGGATTAGCTAGTTGGTGGGGTAAAGGCCTACCAAGGCGACGATCCATAGCTGGTCTGAGAGGATGATCAGCCACACTGGGACTGAGACACGGCCCAGACTCCTACGGGAGGCAGCAGTGGGGAATATTGGACAATGGGCGCAAGCCTGATCCAGCCATGCCGCGTGAGTGATGAAGGCCCTAGGGTTGTAAAGC…
GCF_001605015.1	Aminobacter aminovorans KCTC 2477	AA2016_RS09055	Rhizobiaceae	Aminobacter	Rhizobiales	AACTTGAGAGTTTGATCCTGGCTCAGAACGAACGCTGGCGGCAGGCTTAACACATGCAAGTCGAGCGCCCCGCAAGGGGAGCGGCAGACGGGTGAGTAACGCGTGGGAATCTACCCAGCTCTACGGAATAACTCAGGGAAACTTGTGCTAATACCGTATACGTCCGATAGGAGAAAGATTTATCGGAGTTGGATGAGCCCGCGTTGGATTAGCTAGTTGGTGGGGTAAAGGCCTACCAAGGCGACGATCCATAGCTGGTCTGAGAGGATGATCAGCCACACTGGGACTGAGACACGGCCCAGACTCCTACGGGAGGCAGCAGTGGGGAATATTGGACAATGGGCGCAAGCCTGATCCAGCCATGCCGCGTGAGTGATGAAGGCCCTAGGGTTGTAAAGC…
GCF_001641335.1	Bradyrhizobium stylosanthis BR 446	A7X65_RS38525	Xanthobacteraceae	Bradyrhizobium	Rhizobiales	TCCAACTTGAGAGTTTGATCCTGGCTCAGAGCGAACGCTGGCGGCAGGCTTAACACATGCAAGTCGAGCGGGCGTAGCAATACGTCAGCGGCAGACGGGTGAGTAACGCGTGGGAACGTACCTTTTGGTTCGGAACAACACAGGGAAACTTGTGCTAATACCGGATAAGCCCTTACGGGGAAAGATTTATCGCCGAAAGATCGGCCCGCGTCTGATTAGCTAGTTGGTAGGGTAATGGCC
GCF_001641335.1	Bradyrhizobium stylosanthis BR 446	A7X65_RS39800	Xanthobacteraceae	Bradyrhizobium	Rhizobiales	TCCAACTTGAGAGTTTGATCCTGGCTCAGAGCGAACGCTGGCGGCAGGCTTAACACATGCAAGTCGAGCGGGCGTAGCAATACGTCAGCGGCAGACGGGTGAGTAACGCGTGGGAACGTACCTTTTGGTTCGGAACAACACAGGGAAACTTGTGCTAATACCGGATAAGCCCTTACGGGGAAAGATTTATCGCCGAAAGATCGGCCCGCGTCTGATTAGCTAGTTGGTAGGGTAATGGCC
GCF_001641335.1	Bradyrhizobium stylosanthis BR 446	A7X65_RS40325	Xanthobacteraceae	Bradyrhizobium	Rhizobiales	TCCAACTTGAGAGTTTGATCCTGGCTCAGAGCGAACGCTGGCGGCAGGCTTAACACATGCAAGTCGAGCGGGCGTAGCAATACGTCAGCGGCAGACGGGTGAGTAACGCGTGGGAACGTACCTTTTGGTTCGGAACAACACAGGGAAACTTGTGCTAATACCGGATAAGCCCTTACGGGGAAAGATTTATCGCCGAAAGATCGGCCCGCGTCTGATTAGCTAGTTGGTAGGGTAATGGCCTACCAAGGCGACGATCAGTAGCTGGTCTGAGAGGATGATCAGCCACATTGGGACTGAGACACGGCCCAAACTCCTACGGGAGGCAGCAGTGGGGAATATTGGACAATGGGGGCAACCCTGATCCAGCCATGCCGCGTGAGTGATGAAGGCCCTAGGGTT…
GCF_001641635.1	Bradyrhizobium centrolobii BR 10245	AYJ54_RS37750	Xanthobacteraceae	NA	Rhizobiales	TCCAACTTGAGAGTTTGATCCTGGCTCAGAGCGAACGCTGGCGGCAGGCTTAACACATGCAAGTCGAGCGGGCGTAGCAATACGTCAGCGGCAGACGGGTGAGTAACGCGTGGGAACGTACCTTTTGGTTCGGAACAACACAGGGAAACTTGTGCTAATACCGGATAAGCCCTTACGGGGAAAGATTTATCGCCGAAAGATCGGCCCGCGTCTGATTAGCTAGTTGGTGAGGTAATGGCTCACCAAGGCGACGATCAGTAGCTGGTCTGAGAGGATGATCAGCCACATTGGGACTGAGACACGGCCCAAACTCCTACGGGAGGCAGCAGTGGGGAATATTGGACAATGGGGGCAACCCTGATCCAGCCATGCCGCGTGAGTGATGAAGGCCCTAGGGTT…
GCF_001641635.1	Bradyrhizobium centrolobii BR 10245	AYJ54_RS24505	Xanthobacteraceae	NA	Rhizobiales	TCCAACTTGAGAGTTTGATCCTGGCTCAGAGCGAACGCTGGCGGCAGGCTTAACACATGCAAGTCGAGCGGGCGTAGCAATACGTCAGCGGCAGACGGGTGAGTAACGCGTGGGAACGTACCTTTTGGTTCGGAACAACACAGGGAAACTTGTGCTAATACCGGATAAGCCCTTACGGGGAAAGATTTATCGCCGAAAGATCGGCCCGCGTCTGATTAGCTAGTTGGTGAGGTAATGGCTCACCAAGGCGACGATCAGTAGCTGGTCTGAGAGGATGATCAGCCACATTGGGACTGAGACACGGCCCAAACTCCTACGGGAGGCAGCAGTGGGGAATATTGGACAATGGGGGCAACCCTGATCCAGCCATGCCGCGTGAGTGATGAAGGCCCTAGGGTT…
GCF_001641635.1	Bradyrhizobium centrolobii BR 10245	AYJ54_RS37300	Xanthobacteraceae	NA	Rhizobiales	TCCAACTTGAGAGTTTGATCCTGGCTCAGAGCGAACGCTGGCGGCAGGCTTAACACATGCAAGTCGAGCGGGCGTAGCAATACGTCAGCGGCAGACGGGTGAGTAACGCGTGGGAACGTACCTTTTGGTTCGGAACAACACAGGGAAACTTGTGCTAATACCGGATAAGCCCTTACGGGGAAAGATTTATCGCCGAAAGATCGGCCCGCGTCTGATTAGCTAGTTGGTGAGGTAATGGCTCACCAAGGCGACGATCAGTAGCTGGTCTGAGAGGATGATCAGCCACATTGGGACTGAGACACGGCCCAAACTCCTACGGGAGGCAGCAGTGGGGAATATTGGACAATGGGGGCAACCCTGATCCAGCCATGCCGCGTGAGTGATGAAGGCCCTAGGGTT…
GCF_001641635.1	Bradyrhizobium centrolobii BR 10245	AYJ54_RS37360	Xanthobacteraceae	NA	Rhizobiales	TCCAACTTGAGAGTTTGATCCTGGCTCAGAGCGAACGCTGGCGGCAGGCTTAACACATGCAAGTCGAGCGGGCGTAGCAATACGTCAGCGGCAGACGGGTGAGTAACGCGTGGGAACGTACCTTTTGGTTCGGAACAACACAGGGAAACTTGTGCTAATACCGGATAAGCCCTTACGGGGAAAGATTTATCGCCGAAAGATCGGCCCGCGTCTGATTAGCTAGTTGGTGAGGTAATGGCTCACCAAGGCGACGATCAGTAGCTGGTCTGAGAGGATGATCAGCCACATTGGGACTGAGACACGGCCCAAACTCCTACGGGAGGCAGCAGTGGGGAATATTGGACAATGGGGGCAACCCTGATCCAGCCATGCCGCGTGAGTGATGAAGGCCCTAGGGTT…
GCF_001641695.1	Bradyrhizobium neotropicale BR 10247	AXW67_RS36065	Xanthobacteraceae	NA	Rhizobiales	TCCAACTTGAGAGTTTGATCCTGGCTCAGAGCGAACGCTGGCGGCAGGCTTAACACATGCAAGTCGAGCGGGCGTAGCAATACGTCAGCGGCAGACGGGTGAGTAACGCGTGGGAACGTACCTTTTGGTTCGGAACAACACAGGGAAACTTGTGCTAATACCGGATAAGCCCTTACGGGGAAAGATTTATCGCCGAAAGATCGGCCCGCGTCTGATTAGCTAGTTGGTGAGGTAATGGCTCACCAAGGCGACGATCAGTAGCTGGTCTGAGAGGATGATCAGCCACATTGGGACTGAGACACGGCCCAAACTCCTACGGGAGGCAGCAGTGGGGAATATTGGACAATGGGGGCAACCCTGATCCAGCCATGCCGCGTGAGTGATGAAGGCCCTAGGGTT…
GCF_001641695.1	Bradyrhizobium neotropicale BR 10247	AXW67_RS00015	Xanthobacteraceae	NA	Rhizobiales	TCCAACTTGAGAGTTTGATCCTGGCTCAGAGCGAACGCTGGCGGCAGGCTTAACACATGCAAGTCGAGCGGGCGTAGCAATACGTCAGCGGCAGACGGGTGAGTAACGCGTGGGAACGTACCTTTTGGTTCGGAACAACACAGGGAAACTTGTGCTAATACCGGATAAGCCCTTACGGGGAAAGATTTATCGCCGAAAGATCGGCCCGCGTCTGATTAGCTAGTTGGTGAGGTAATGGCTCACCAAGGCGACGATCAGTAGCTGGTCTGAGAGGATGATCAGCCACATTGGGACTGAGACACGGCCCAAACTCCTACGGGAGGCAGCAGTGGGGAATATTGGACAATGGGGGCAACCCTGATCCAGCCATGCCGCGTGAGTGATGAAGGCCCTAGGGTT…
GCF_001641695.1	Bradyrhizobium neotropicale BR 10247	AXW67_RS08090	Xanthobacteraceae	NA	Rhizobiales	TCCAACTTGAGAGTTTGATCCTGGCTCAGAGCGAACGCTGGCGGCAGGCTTAACACATGCAAGTCGAGCGGGCGTAGCAATACGTCAGCGGCAGACGGGTGAGTAACGCGTGGGAACGTACCTTTTGGTTCGGAACAACACAGGGAAACTTGTGCTAATACCGGATAAGCCCTTACGGGGAAAGATTTATCGCCGAAAGATCGGCCCGCGTCTGATTAGCTAGTTGGTGAGGTAATGGCTCACCAAGGCGACGATCAGTAGCTGGTCTGAGAGGATGATCAGCCACATTGGGACTGAGACACGGCCCAAACTCCTACGGGAGGCAGCAGTGGGGAATATTGGACAATGGGGGCAACCCTGATCCAGCCATGCCGCGTGAGTGATGAAGGCCCTAGGGTT…
GCF_001641695.1	Bradyrhizobium neotropicale BR 10247	AXW67_RS10210	Xanthobacteraceae	NA	Rhizobiales	TCCAACTTGAGAGTTTGATCCTGGCTCAGAGCGAACGCTGGCGGCAGGCTTAACACATGCAAGTCGAGCGGGCGTAGCAATACGTCAGCGGCAGACGGGTGAGTAACGCGTGGGAACGTACCTTTTGGTTCGGAACAACACAGGGAAACTTGTGCTAATACCGGATAAGCCCTTACGGGGAAAGATTTATCGCCGAAAGATCGGCCCGCGTCTGATTAGCTAGTTGGTGAGGTAATGGCTCACCAAGGCGACGATCAGTAGCTGGTCTGAGAGGATGATCAGCCACATTGGGACTGAGACACGGCCCAAACTCCTACGGGAGGCAGCAGTGGGGAATATTGGACAATGGGGGCAACCCTGATCCAGCCATGCCGCGTGAGTGATGAAGGCCCTAGGGTT…
GCF_001642675.1	Bradyrhizobium diazoefficiens USDA 110	AAV28_RS03935	Xanthobacteraceae	Bradyrhizobium	Rhizobiales	TCCAACTTGAGAGTTTGATCCTGGCTCAGAGCGAACGCTGGCGGCAGGCTTAACACATGCAAGTCGAGCGGGCGTAGCAATACGTCAGCGGCAGACGGGTGAGTAACGCGTGGGAACGTACCTTTTGGTTCGGAACAACACAGGGAAACTTGTGCTAATACCGGATAAGCCCTTACGGGGAAAGATTTATCGCCGAAAGATCGGCCCGCGTCTGATTAGCTAGTTGGTAGGGTAACGGCCTACCAAGGCGACGATCAGTAGCTGGTCTGAGAGGATGATCAGCCACATTGGGACTGAGACACGGCCCAAACTCCTACGGGAGGCAGCAGTGGGGAATATTGGACAATGGGGGCAACCCTGATCCAGCCATGCCGCGTGAGTGATGAAGGCCCTAGGGTT…
[truncated: 538 more rows]

## Sheet: Table S3
Table S3. Distance matrices comparing the 16S rRNA sequences extracted from the genomes with reference sequences for type strains according to accessions provided on LPSN and/or description papers. Profile-to-profile alignments considering RNA secondary structure were used to compute pairwise distances with no gaps counted in the identity measure.
[truncated: 155 more rows]

[truncated: 3 more sheets: Table S4, TableS5, TableS6]
